# Supplementary material
Source: publisher figshare collection journal article supplement (https://gsajournals.figshare.com/ndownloader/files/12839771)
Supplement: Supplementary file 1 [file 12839771]

Table S2. Amino acid substitutions used to measure performance and predictions for seven approaches. The amino acid substitutions include 2,910 with phenotypic effects and 10,797 SNPs in 995 A. thaliana genes.
Protein	Position	WT	MUT	Description	Allele	Reference	GeneName	Class	Frequency	Duplicated(1=yes,0=no)	Training (1=True positive, 0=True negative)	SiftScore	PolyPhen2	Provean	MAPP	Gerp++	LRT-logistic	LRTm-logistic	Constraint	MaskedConstraint	Log10(P-value LRT)	Log10(P-value LRTmasked)	Rn	An	Sift.95.Spec	Sift.95.Sens	Poly.95.Spec	Poly.95.Sens	Prov.95.Spec	Prov.95.Sens	MAPP.95.Spec	MAPP.95.Sens	Gerp.95.Spec	Gerp.95.Sens	LRT.95.Spec	LRT.95.Sens	LRTm.95.Spec	LRTm.95.Sens
AT4G16420.1	216	K	A	Disrupts acetylation of ADA2b	NA	PubMed:16603259	ADA2B	SWISSPROT	NA	0	1	NA	0.386	-5.23	7.09	8.89	0.889424292	0.872388156	0.0961051	0.0961648	-7.648688873	-7.657577317	39	0	NA	NA	0	1	1	1	0	1	1	1	0	1	0	1
AT1G01040.2	395	E	K	In dcl1-13; early-flowering and decreased number of leaves. Suppresses hyl1 mutant phenotype.	dcl1-13	http://rnajournal.cshlp.org/content/15/3/450.full	DCL1	BOTH	NA	0	1	0	0.99	-3.796	14.79	5.93	0.906522145	0.887721713	0.0503677	0.050397	-9.167434186	-9.176778139	37	0	1	1	0	1	0	1	1	1	0	1	1	1	0	1
AT1G01040.2	415	P	S	In sin1-1; impaired reproductive development.	sin1-1	http://rnajournal.cshlp.org/content/15/3/450.full	DCL1	BOTH	NA	0	1	0	1	-7.66	17.5	6.98	0.943067216	0.927048244	5.61E-16	3.68E-17	-11.62120433	-11.63123723	37	0	1	1	1	1	1	1	1	1	0	1	1	1	1	1
AT1G01040.2	431	I	K	In sin1-2; impaired reproductive development.	sin1-2	http://rnajournal.cshlp.org/content/15/3/450.full	DCL1	BOTH	NA	0	1	0.002	1	-6.64	28.51	6.99	0.956406331	0.942772768	2.11E-16	2.11E-16	-12.58968176	-12.60050107	38	0	1	1	1	1	1	1	1	1	0	1	1	1	1	1
AT1G01040.2	107	K	M	NA	NA	NA	NA	ENSVATH00000052	0.1375	0	0	0.171	0.578	-0.84	3.22	-6.65	0.172141395	0.174512189	0.820951	0.823166	-0.216667522	-0.220647417	13	0	0	0	0	1	0	0	0	1	0	0	0	0	0	0
AT1G01040.2	528	A	V	NA	NA	NA	NA	ENSVATH00000056	0.025	0	NA	0.087	0.184	-1.938	9.53	2.78	0.853999416	0.773394546	0.0299963	0.0300153	-8.629000503	-8.637856932	35	2	0	1	0	1	0	1	0	1	0	1	0	1	0	1
AT1G01040.2	961	V	A	NA	NA	NA	NA	ENSVATH00000059	0.075	0	NA	0.034	0.936	-2.37	7.28	5.87	0.913373417	0.896831028	0.0478678	0.047894	-8.873615269	-8.876559958	39	0	1	1	0	1	0	1	0	1	0	1	1	1	0	1
AT1G01040.2	1205	G	E	NA	NA	NA	NA	ENSVATH00000061	0.025	0	NA	0.048	0.574	-2.5	9.12	-8.84	0.159306757	0.159793307	0.716971	0.718728	-0.370942261	-0.375392048	11	0	0	1	0	1	0	1	0	1	0	0	0	0	0	0
AT1G01040.2	1808	I	F	NA	NA	NA	NA	ENSVATH00000070	0.1375	0	0	0.062	0.002	-0.782	NA	-4.74	0.027669806	0.030683744	10	10	-2.015063338	-3.88008459	1	0	0	1	0	0	0	0	NA	NA	0	0	0	0	0	0
AT1G01040.2	405	R	K	NA	NA	NA	NA	ENSVATH01000237	0.0375	0	NA	0.135	0.342	-1.747	6.07	7.02	0.954561414	0.940659753	1.61E-16	1.36E-16	-12.38745772	-12.39769687	38	0	0	1	0	1	0	1	0	1	0	1	1	1	1	1
AT1G01040.2	1324	L	I	NA	NA	NA	NA	ENSVATH01000245	0.0125	0	NA	0.208	0.22	-0.811	2.48	5.99	0.921124483	0.90406345	0.0570589	0.0570812	-9.699556481	-9.707548762	38	0	0	0	0	1	0	0	0	0	0	1	1	1	1	1
AT1G01040.2	1538	P	S	NA	NA	NA	NA	ENSVATH01000249	0.075	0	NA	0.794	0.023	-4.006	3.2	-0.51	0.513205817	0.506639693	0.335555	0.336017	-1.825408195	-1.832316476	29	0	0	0	0	0	0	1	0	1	0	1	0	1	0	1
AT1G01040.2	1826	K	R	NA	NA	NA	NA	ENSVATH01000252	0.025	0	NA	0.036	0.022	-1.718	1.84	-0.595	0.695606658	0.632396275	0.161141	0.161248	-5.161358665	-5.170163177	31	1	1	1	0	0	0	1	0	0	0	1	0	1	0	1
AT1G01040.2	10	A	D	NA	NA	NA	NA	ENSVATH04500351	0.0125	0	NA	0.05	0	0.306	3.21	-2.33	0.05925607	0.027469701	2.34618	1.9411	-1.01535884	-1.403020454	6	5	0	1	0	0	0	0	0	1	0	0	0	0	0	0
AT1G01040.2	47	T	P	NA	NA	NA	NA	ENSVATH04500353	0.0375	0	NA	0.246	0	-0.62	7.04	-13.5	0.099315734	0.102638979	1.51436	1.51976	-0.683914278	-0.677230947	5	0	0	0	0	0	0	0	0	1	0	0	0	0	0	0
AT1G01040.2	230	A	S	NA	NA	NA	NA	ENSVATH04500355	0.0125	0	NA	0.455	0.001	0.278	2.78	-12.85	0.119216947	0.118165425	4.9284	5.13462	-3.860618434	-3.77302653	10	1	0	0	0	0	0	0	0	0	0	0	0	0	0	0
AT1G01040.2	230	A	V	NA	NA	NA	NA	ENSVATH04500356	0.0125	0	NA	0.033	0	-0.533	1.99	-13.5	0.042616636	0.009325342	4.9284	5.13462	-3.860618434	-3.77302653	10	10	1	1	0	0	0	0	0	0	0	0	0	0	0	0
AT1G01040.2	490	Q	L	NA	NA	NA	NA	ENSVATH04500363	0.0625	0	NA	0.301	0	-2.173	2.72	2.741	0.172828521	0.039187426	0.228769	0.228961	-3.487825425	-3.495177223	17	9	0	0	0	0	0	1	0	0	0	1	0	0	0	0
AT1G01040.2	870	K	R	NA	NA	NA	NA	ENSVATH04500377	0.0375	0	NA	0.243	0.022	-1.382	2.89	4.75	0.892607777	0.85146863	0.0746205	0.074656	-9.047204604	-9.056731544	37	1	0	0	0	0	0	1	0	1	0	1	1	1	0	1
AT1G01040.2	933	Q	L	NA	NA	NA	NA	ENSVATH04500381	0.0125	0	NA	0.005	0.017	-3.498	4.4	2.735	0.213036861	0.196119605	0.199228	0.199533	-3.255962974	-3.267311985	6	0	1	1	0	0	0	1	0	1	0	1	0	0	0	0
AT1G01040.2	950	T	S	NA	NA	NA	NA	ENSVATH04500382	0.0125	0	NA	0.302	0.988	-3.286	2.68	6.37	0.949033874	0.922823394	0.0190023	0.0190102	-12.07601603	-12.08536389	39	1	0	0	0	1	0	1	0	0	0	1	1	1	1	1
AT1G01040.2	1211	D	Y	NA	NA	NA	NA	ENSVATH04500386	0.0125	0	NA	0.036	0.019	-5.368	9.96	5.94	0.824555679	0.80153005	0.101024	0.101087	-6.862696538	-6.872354291	34	0	1	1	0	0	1	1	0	1	0	1	0	1	0	1
AT1G01040.2	1457	D	N	NA	NA	NA	NA	ENSVATH04500393	0.1375	0	0	0.115	0.239	-2.376	3.23	8.56	0.542643245	0.518973812	0.138251	0.13834	-3.908079924	-3.917171561	24	0	0	1	0	1	0	1	0	1	1	1	0	1	0	1
AT1G01040.2	1502	T	M	NA	NA	NA	NA	ENSVATH04500394	0.0125	0	NA	0.008	0.95	-5.425	4.19	8.53	0.943831428	0.927983921	0.027543	0.0275516	-11.71541814	-11.72467943	37	0	1	1	0	1	1	1	0	1	1	1	1	1	1	1
AT1G01040.2	1536	D	G	NA	NA	NA	NA	ENSVATH04500395	0.0125	0	NA	0.161	0.002	-1.174	4.75	1.26	0.26250368	0.240887662	0.185643	0.185789	-3.836370579	-3.845028559	8	0	0	0	0	0	0	0	0	1	0	1	0	0	0	0
AT1G01040.2	1642	A	V	NA	NA	NA	NA	ENSVATH04500399	0.0125	0	NA	0.013	0.563	-3.268	7.75	7.75	0.832493058	0.813558133	0.0951644	0.0951932	-6.079876674	-6.094648892	37	0	1	1	0	1	0	1	0	1	0	1	0	1	0	1
AT1G01040.2	1820	N	I	NA	NA	NA	NA	ENSVATH04500410	0.0125	0	NA	0.122	0.19	-1.431	NA	-1.32	0.094401728	0.093281828	0.765519	0.860669	-0.01724272	-0.039119381	4	0	0	1	0	1	0	1	NA	NA	0	1	0	0	0	0
AT1G01360.1	159	C	S	Abnormal stable homogeneity in reducing condition.	NA	PubMed:23844015, PubMed:24645846	PYL9	SWISSPROT	NA	1	1	0.365	1	-8.584	14.19	9.44	0.979888832	0.97136845	0.0143384	0.0143407	-16	-16	39	0	0	0	1	1	1	1	1	1	1	1	1	1	1	1
AT1G01360.1	112	I	V	Increased HAB1 inhibitory ability.	NA	PubMed:23844015	PYL9	SWISSPROT	NA	1	1	0.81	0.572	-0.991	6.7	7.8	0.957062186	0.940013206	0.031303	0.0313083	-15.11569526	-15.11569526	31	0	0	0	0	1	0	0	0	1	0	1	1	1	1	1
AT1G01360.1	7	G	D	NA	NA	NA	NA	ENSVATH00000602	0.0375	1	NA	0.056	0.016	-0.149	5.87	1.7	0.516011401	0.414588001	0.293991	0.294207	-3.336349007	-3.344642552	28	2	0	1	0	0	0	0	0	1	0	1	0	1	0	1
AT1G01360.1	13	G	C	NA	NA	NA	NA	ENSVATH04502062	0.0125	1	NA	0.087	0.994	-1.154	1.66	-7.39	0.114918905	0.072870779	0.893021	0.911207	-0.131905977	-0.165792999	12	3	0	1	1	1	0	0	0	0	0	0	0	0	0	0
AT1G01360.1	18	V	E	NA	NA	NA	NA	ENSVATH04502064	0.0125	1	NA	1	0.261	1.287	5.55	3.79	0.127587752	0.12120261	0.545483	0.570485	-0.939445689	-1.066016442	5	0	0	0	0	1	0	0	0	1	0	1	0	0	0	0
AT1G01360.1	165	L	V	Slight potentiation of (-)-ABA-binding.	NA	PubMed:23844015	PYL9	SWISSPROT	NA	1	1	1	0.557	-2.377	10.74	0.166	0.923969352	0.890297268	0.0419822	0.0419901	-10.45299491	-10.45687478	38	1	0	0	0	1	0	1	0	1	0	1	1	1	0	1
AT1G01360.1	29	C	S	Stable homogeneity in reducing condition.	NA	PubMed:23844015, PubMed:24645846	PYL9	SWISSPROT	NA	1	1	0.389	0.001	-0.108	3.24	1.885	0.267727705	0.246034368	0.270548	0.270638	-4.048160467	-4.052004901	8	0	0	0	0	0	0	0	0	1	0	1	0	0	0	0
AT1G01360.1	34	C	S	Stable homogeneity in reducing condition.	NA	PubMed:23844015, PubMed:24645846	PYL9	SWISSPROT	NA	1	1	0.015	0.458	-8.768	14.04	10	0.982646636	0.975317914	4.36E-17	4.36E-17	-16	-16	41	0	1	1	0	1	1	1	1	1	1	1	1	1	1	1
AT1G01510.1	118	E	K	In am-EM2; decreased trichome branching and modified microtubule density along the basal-apical axis of the trichome.	am-em2	PubMed:11889034	AN	SWISSPROT	NA	0	1	0	0.993	-3.299	5.45	8.3	0.774085479	0.757027368	0.129812	0.129845	-4.732162082	-4.733876538	36	0	1	1	1	1	0	1	0	1	1	1	0	1	0	1
AT1G01510.1	170	G	D	In doq-1; premature opening of flowers and twisted petals.	doq-1	PubMed:23368817	AN	SWISSPROT	NA	0	1	0	1	-6.313	35.86	10	0.947475386	0.935099024	2.05E-16	2.77E-16	-10.30596722	-10.3076308	42	0	1	1	1	1	1	1	1	1	1	1	1	1	1	1
AT1G01510.1	22	H	Y	NA	NA	NA	NA	ENSVATH00000837	0.0625	0	NA	0.003	0.001	1.353	6.61	-5.87	0.10008261	0.09950914	0.717439	0.722259	-0.286802726	-0.295508876	4	0	1	1	0	0	0	0	0	1	0	0	0	0	0	0
AT1G01510.1	37	D	E	NA	NA	NA	NA	ENSVATH00000838	0.0625	0	NA	1	0.003	0.395	1.94	-8.5	0.065985839	0.005303055	0.524043	0.524228	-1.141290202	-1.1424691	20	15	0	0	0	0	0	0	0	0	0	0	0	0	0	0
AT1G01510.1	346	V	G	NA	NA	NA	NA	ENSVATH04502768	0.05	0	NA	0.101	0	0.365	7.4	5.51	0.095881494	0.068669991	0.623981	0.624806	-0.791736053	-0.794322069	5	2	0	1	0	0	0	0	0	1	0	1	0	0	0	0
AT1G01510.1	432	Y	F	NA	NA	NA	NA	ENSVATH04502772	0.125	0	0	0.015	0.011	-0.261	5.68	3.76	0.193004195	0.180043029	0.279651	0.27971	-2.764173709	-2.765437164	6	0	1	1	0	0	0	0	0	1	0	1	0	0	0	0
AT1G01510.1	540	L	S	NA	NA	NA	NA	ENSVATH04502773	0.05	0	NA	0.006	0.44	-3.389	7.98	4.115	0.368141204	0.329798544	0.149566	0.149582	-6.112945622	-6.114170244	8	0	1	1	0	1	0	1	0	1	0	1	0	1	0	1
AT1G01580.1	384	T	M	In frd1-3; loss of induced ferric-chelate reductase activity.	frd1-3	PubMed:10067892	FRO2	SWISSPROT	NA	1	1	0.001	1	-5.867	22.73	8.94	0.963848613	0.94978637	0.0286298	0.0286368	-14.91713567	-14.91713567	34	0	1	1	1	1	1	1	1	1	1	1	1	1	1	1
AT1G01580.1	442	E	D	NA	NA	NA	NA	ENSVATH00000984	0.175	1	0	1	0.001	2.039	1.26	-15.9	0.230134216	0.087015219	0.0635231	0.0635396	-14.35360902	-14.36463188	15	24	0	0	0	0	0	0	0	0	0	0	0	0	0	0
AT1G01580.1	40	M	I	NA	NA	NA	NA	ENSVATH01002137	0.0625	1	NA	0.385	0.005	-1.028	5.62	-4.35	0.319022038	0.271129881	0.290994	0.291391	-2.352193701	-2.363992802	18	1	0	0	0	0	0	0	0	1	0	0	0	1	0	0
AT1G01580.1	330	F	L	NA	NA	NA	NA	ENSVATH04503205	0.0125	1	NA	0.1	0.028	-5.373	7.24	8.93	0.959300507	0.909245814	0.0454564	0.0454668	-15.05692316	-15.05692316	37	3	0	1	0	0	1	1	0	1	1	1	1	1	1	1
AT1G01580.1	423	L	H	NA	NA	NA	NA	ENSVATH04503209	0.0125	1	NA	0.001	0.471	-6.575	6.05	6.78	0.889534746	0.862449194	0.073476	0.0734982	-10.73192072	-10.74097026	30	0	1	1	0	1	1	1	0	1	0	1	0	1	0	1
AT1G01580.1	445	V	L	NA	NA	NA	NA	ENSVATH04503216	0.1	1	NA	0.16	0.875	-2.84	6.5	3.41	0.920653174	0.862741688	0.0585158	0.0585317	-11.85830884	-11.86734335	35	2	0	0	0	1	0	1	0	1	0	1	1	1	0	1
AT1G01580.1	543	D	E	NA	NA	NA	NA	ENSVATH04503219	0.0125	1	NA	0.099	0.244	-3.842	3.32	-6.48	0.945408479	0.913704843	0.0588565	0.0588739	-13.83764771	-13.851126	33	1	0	1	0	1	0	1	0	1	0	0	1	1	1	1
AT1G01580.1	651	N	S	NA	NA	NA	NA	ENSVATH04503223	0.025	1	NA	0.712	0.659	-3.872	1.95	3.1	0.741823675	0.707265913	0.141664	0.141723	-7.355227692	-7.366531543	26	0	0	0	0	1	0	1	0	0	0	1	0	1	0	1
AT1G01580.1	656	I	V	NA	NA	NA	NA	ENSVATH04503224	0.0125	1	NA	0.079	0.008	-0.929	2.89	-7.17	0.396392377	0.273679682	0.107546	0.107597	-7.778465791	-7.788617783	8	2	0	1	0	0	0	0	0	1	0	0	0	1	0	0
AT1G01900.1	552	S	A	Loss of protease activity.	NA	PubMed:18643977	SBTI1.1	SWISSPROT	NA	0	1	0	1	-2.98	28.89	10	0.980693495	0.972879831	2.30E-16	4.36E-17	-15.49208344	-15.49208344	41	0	1	1	1	1	0	1	1	1	1	1	1	1	1	1
AT1G01900.1	219	T	A	NA	NA	NA	NA	ENSVATH00001577	0.0125	0	NA	0.237	0	1.953	3.41	0.223	0.053629757	0.444336171	0.0813287	0.0678569	-7.3854972	-6.230363504	1	15	0	0	0	0	0	0	0	1	0	1	0	0	0	1
AT1G01900.1	601	A	T	NA	NA	NA	NA	ENSVATH00001587	0.0125	0	NA	1	0	0.804	4.14	-10.3	0.121763345	0.092470791	1.0755	1.08155	-0.075936881	-0.070297598	12	2	0	0	0	0	0	0	0	1	0	0	0	0	0	0
AT1G01900.1	708	V	A	NA	NA	NA	NA	ENSVATH00001592	0.0125	0	NA	0.586	0.035	-2.72	3.95	3.07	0.503904199	0.163692564	0.0793745	0.0640533	-8.014600469	-6.844317879	30	10	0	0	0	0	0	1	0	1	0	1	0	1	0	0
AT1G01900.1	139	E	D	NA	NA	NA	NA	ENSVATH01003176	0.4625	0	0	0.617	0.106	-0.648	3.72	-2.04	0.084232737	0.053239382	0.981959	0.987736	-0.011714904	-0.017428032	8	3	0	0	0	1	0	0	0	1	0	1	0	0	0	0
AT1G01900.1	180	E	D	NA	NA	NA	NA	ENSVATH01003177	0.025	0	NA	0.361	0.168	-1.655	3.16	-17.4	0.174103039	0.184905301	2.32081	2.3628	-1.766902312	-1.726556552	13	0	0	0	0	1	0	1	0	1	0	0	0	0	0	0
AT1G01900.1	75	S	C	NA	NA	NA	NA	ENSVATH04504875	0.0125	0	NA	0.008	0.789	-2.05	2.4	-19.1	0.150847714	0.167824	4.69891	4.79875	-4.990413143	-4.934734077	8	0	1	1	0	1	0	1	0	0	0	0	0	0	0	0
AT1G01900.1	96	D	N	NA	NA	NA	NA	ENSVATH04504877	0.0125	0	NA	0.291	0.015	0.719	1.51	-5.02	0.100075976	0.075035529	1.00043	1.00751	-0.006775457	-0.000386694	9	2	0	0	0	0	0	0	0	0	0	0	0	0	0	0
AT1G01900.1	135	G	D	NA	NA	NA	NA	ENSVATH04504878	0.025	0	NA	0.14	0.953	-6.014	5.69	7.85	0.720551254	0.690681185	0.108813	0.108882	-6.126050795	-6.139918453	28	0	0	1	0	1	1	1	0	1	0	1	0	1	0	1
AT1G01900.1	158	E	D	NA	NA	NA	NA	ENSVATH04504879	0.0125	0	NA	0.175	0.161	-2.913	10.21	2.18	0.972523557	0.945817568	0.00846064	0.0084638	-16	-16	38	2	0	0	0	1	0	1	0	1	0	1	1	1	1	1
AT1G01900.1	188	E	A	NA	NA	NA	NA	ENSVATH04504882	0.0125	0	NA	0.913	0.001	-1.481	3.87	0.105	0.089342061	0.148402777	0.318019	0.243552	-3.862307322	-2.669328568	1	4	0	0	0	0	0	1	0	1	0	1	0	0	0	0
AT1G01900.1	374	G	R	NA	NA	NA	NA	ENSVATH04504895	0.0125	0	NA	0.003	1	-7.433	36.52	10	0.982646636	0.975317914	4.36E-17	1.12E-16	-16	-16	41	0	1	1	1	1	1	1	1	1	1	1	1	1	1	1
AT1G01900.1	381	P	S	NA	NA	NA	NA	ENSVATH04504900	0.0125	0	NA	0.134	0.029	-6.376	5.35	7.22	0.71629856	0.443878238	0.0546903	0.0429008	-10.33634901	-8.999999957	31	7	0	1	0	0	1	1	0	1	0	1	0	1	0	1
AT1G01900.1	391	E	G	NA	NA	NA	NA	ENSVATH04504902	0.0125	0	NA	0.359	0	1.063	1.57	-7.86	0.013928906	0.138635438	1.6221	1.39699	-0.379034683	-0.639209741	1	14	0	0	0	0	0	0	0	0	0	0	0	0	0	0
AT1G01900.1	476	A	T	NA	NA	NA	NA	ENSVATH04504905	0.0125	0	NA	0.51	0.02	-0.081	2.91	-1.15	0.174363543	0.121420343	0.320431	0.321169	-2.673951032	-2.689519109	8	2	0	0	0	0	0	0	0	1	0	1	0	0	0	0
AT1G01900.1	531	S	C	NA	NA	NA	NA	ENSVATH04504907	0.0125	0	NA	0.037	0.99	-0.761	1.73	-4.78	0.117355498	0.122663134	1.21576	0.91459	-0.089884883	-0.231743091	8	0	1	1	0	1	0	0	0	0	0	0	0	0	0	0
AT1G01900.1	531	S	T	NA	NA	NA	NA	ENSVATH04504908	0.0125	0	NA	0.282	0.009	1.522	2.44	-4.78	0.037205858	0.015102123	1.21576	0.91459	-0.089884883	-0.231743091	8	10	0	0	0	0	0	0	0	0	0	0	0	0	0	0
AT1G01900.1	531	S	R	NA	NA	NA	NA	ENSVATH04504909	0.0125	0	NA	0.037	0.971	-1.693	24.53	-6.41	0.117355498	0.122663134	1.21576	0.91459	-0.089884883	-0.231743091	8	0	1	1	0	1	0	1	1	1	0	0	0	0	0	0
AT1G01900.1	696	V	L	NA	NA	NA	NA	ENSVATH04504914	0.0125	0	NA	0.423	0.617	-2.802	4.44	3.9	0.542162305	0.356637015	0.137723	0.137835	-3.4497692	-3.462824641	32	4	0	0	0	1	0	1	0	1	0	1	0	1	0	1
AT1G01900.1	704	C	S	NA	NA	NA	NA	ENSVATH04504915	0.025	0	NA	1	0.029	0.849	0.74	-0.3565	0.022711214	0.013727182	0.551801	0.553968	-0.794692761	-0.804058857	11	18	0	0	0	0	0	0	0	0	0	1	0	0	0	0
AT1G01900.1	707	M	I	NA	NA	NA	NA	ENSVATH04504916	0.0375	0	NA	0.179	0	-0.16	2.68	-11.3	0.091228337	0.068974031	1.49773	1.5094	-0.704595654	-0.688841849	7	2	0	0	0	0	0	0	0	0	0	0	0	0	0	0
AT1G01900.1	723	K	E	NA	NA	NA	NA	ENSVATH04504917	0.0125	0	NA	0.909	0.007	-1.537	2.57	-0.957	0.171679571	0.110976525	0.668453	0.672906	-0.404187542	-0.414161542	17	3	0	0	0	0	0	1	0	0	0	1	0	0	0	0
AT1G01900.1	729	K	Q	NA	NA	NA	NA	ENSVATH04504918	0.0125	0	NA	0.454	0.813	-2.471	2.41	4.06	0.524357065	0.513002411	0.253231	0.25367	-2.291002407	-2.306440999	28	0	0	0	0	1	0	1	0	0	0	1	0	1	0	1
AT1G02050.1	132	I	T	In lap6-1; pollen exine layer defects leading to altered pollen-stigma adhesion.	lap6-1	PubMed:20442277	PKSA	SWISSPROT	NA	1	1	0	1	-4.628	9.42	8.92	0.982570422	0.975241615	0.0216884	0.0216913	-16	-16	41	0	1	1	1	1	1	1	0	1	1	1	1	1	1	1
AT1G02050.1	324	T	A	NA	NA	NA	NA	ENSVATH00001793	0.1125	1	0	0.911	0.004	0.265	3.77	-4.7	0.135917237	0.082522843	0.474505	0.474755	-1.690642417	-1.693568539	9	3	0	0	0	0	0	0	0	1	0	0	0	0	0	0
AT1G02050.1	262	E	D	NA	NA	NA	NA	ENSVATH01003437	0.75	1	0	1	0	2.989	1.29	-7.17	0.009250023	0.903423819	0.0898468	0.0747801	-11.6193348	-10.51684222	1	37	0	0	0	0	0	0	0	0	0	0	0	0	0	1
AT1G02050.1	302	M	V	NA	NA	NA	NA	ENSVATH04505520	0.025	1	NA	0.624	0	-0.332	2.5	-7.46	0.103852311	0.062520497	0.524096	0.524522	-1.342456557	-1.346266645	6	3	0	0	0	0	0	0	0	0	0	0	0	0	0	0
AT1G02050.1	120	G	S	NA	NA	NA	NA	ENSVATH04505523	0.0125	1	NA	0.131	0.003	0.911	2.55	-2.34	0.157270098	0.078644839	0.215409	0.215527	-3.161862098	-3.165744016	8	4	0	1	0	0	0	0	0	0	0	0	0	0	0	0
AT1G02050.1	115	L	V	NA	NA	NA	NA	ENSVATH04505524	0.0125	1	NA	0.644	0.021	0.249	4.04	-20	0.165607617	0.150960465	1.70917	1.7128	-0.749116672	-0.745664651	15	1	0	0	0	0	0	0	0	1	0	0	0	0	0	0
AT1G02050.1	93	T	K	NA	NA	NA	NA	ENSVATH04505525	0.0125	1	NA	0.847	0.856	-2.042	4.64	-0.372	0.795540447	0.773788976	0.129317	0.129349	-6.012182741	-6.016579409	34	0	0	0	0	1	0	1	0	1	0	1	0	1	0	1
AT1G02050.1	88	Y	H	NA	NA	NA	NA	ENSVATH04505526	0.0625	1	NA	0.77	1	-0.599	2.64	4.07	0.822252022	0.42466219	0.0646283	0.0646378	-12.6469016	-12.65119881	32	9	0	0	1	1	0	0	0	0	0	1	0	1	0	1
AT1G02050.1	82	R	Q	NA	NA	NA	NA	ENSVATH04505527	0.0125	1	NA	0.077	0.865	0.677	2.57	5.715	0.629984349	0.562795882	0.0910468	0.0910567	-10.72384852	-10.72671161	9	0	0	1	0	1	0	0	0	0	0	1	0	1	0	1
AT1G02065.1	247	S	D	Complete loss of DNA binding. Slight increase in nuclear import efficiency.	NA	PubMed:16095614	SPL8	SWISSPROT	NA	0	1	NA	0.954	-3.702	36.9	10	0.982646636	0.975317914	7.71E-18	3.68E-17	-16	-16	41	0	NA	NA	0	1	0	1	1	1	1	1	1	1	1	1
AT1G02065.1	248	C	A	Increase in nuclear import efficiency.	NA	PubMed:16095614	SPL8	SWISSPROT	NA	0	1	NA	0.98	-8.248	31.68	10	0.982646636	0.975317914	2.05E-17	4.36E-17	-16	-16	41	0	NA	NA	0	1	1	1	1	1	1	1	1	1	1	1
AT1G02065.1	22	D	E	NA	NA	NA	NA	ENSVATH00001823	0.05	0	NA	0.769	0.001	-0.931	3.26	-2.75	0.237397311	0.203375395	0.481264	0.483114	-1.311898006	-1.324946086	16	1	0	0	0	0	0	0	0	1	0	0	0	0	0	0
AT1G02065.1	277	T	P	NA	NA	NA	NA	ENSVATH00001827	0.2	0	0	0.285	0	-0.611	2.63	-7.63	0.058952863	0.083530889	0.221843	0.185381	-3.088302922	-2.334907983	4	9	0	0	0	0	0	0	0	0	0	0	0	0	0	0
AT1G02065.1	20	N	H	NA	NA	NA	NA	ENSVATH01003495	0.1	0	NA	0.201	0.002	-0.485	2.49	-7.85	0.119511868	0.107012748	1.48997	1.51211	-0.497924008	-0.480708974	10	1	0	0	0	0	0	0	0	0	0	0	0	0	0	0
AT1G02065.1	27	R	P	NA	NA	NA	NA	ENSVATH04505627	0.0125	0	NA	0.011	0.993	-4.253	NA	-0.3285	0.131997043	0.13110721	0.596921	0.606513	-0.254264896	-0.264688596	8	0	1	1	1	1	0	1	NA	NA	0	1	0	0	0	0
AT1G02065.1	44	R	S	NA	NA	NA	NA	ENSVATH04505628	0.0125	0	NA	0.552	0.001	0.557	2.56	1.16	0.131245066	0.090571618	0.286754	0.287375	-2.112148177	-2.124399388	5	2	0	0	0	0	0	0	0	0	0	1	0	0	0	0
AT1G02065.1	98	G	V	NA	NA	NA	NA	ENSVATH04505630	0.025	0	NA	0.185	0	-1.593	NA	-0.839	0.020730022	0.034509251	8.83205	10	-2.257986186	-1.029682419	2	0	0	0	0	0	0	1	NA	NA	0	1	0	0	0	0
AT1G02065.1	165	V	G	NA	NA	NA	NA	ENSVATH04505632	0.0125	0	NA	0.003	0.996	-6.593	9.23	9.18	0.944516224	0.928075015	0.0368045	0.0368165	-12.1246493	-12.13875302	36	0	1	1	1	1	1	1	0	1	1	1	1	1	1	1
AT1G02065.1	176	E	D	NA	NA	NA	NA	ENSVATH04505633	0.0125	0	NA	0.789	0.979	-1.502	2.97	-17.4	0.450371697	0.306386062	0.211262	0.211569	-4.318419603	-4.334316779	23	3	0	0	0	1	0	1	0	1	0	0	0	1	0	1
AT1G02065.1	290	S	L	NA	NA	NA	NA	ENSVATH04505650	0.0125	0	NA	0.031	0.976	-3.935	14.97	7.435	0.903090257	0.88219861	0.0455431	0.0455468	-9.668657546	-9.674714065	35	0	1	1	0	1	0	1	1	1	0	1	1	1	0	1
AT1G02065.1	300	T	A	NA	NA	NA	NA	ENSVATH04505652	0.025	0	NA	0.818	0.332	-0.578	4.6	0.924	0.335112059	0.307118216	0.111844	0.111959	-4.350182427	-4.36694887	11	0	0	0	0	1	0	0	0	1	0	1	0	1	0	1
AT1G02065.1	247	S	A	Slight decrease in DNA binding and nuclear import efficiency.	NA	PubMed:16095614	SPL8	SWISSPROT	NA	0	1	NA	0.677	-2.786	28.89	10	0.982646636	0.975317914	7.71E-18	3.68E-17	-16	-16	41	0	NA	NA	0	1	0	1	1	1	1	1	1	1	1	1
AT1G02065.1	233	S	A	Slight decrease in DNA binding efficiency.	NA	PubMed:16095614	SPL8	SWISSPROT	NA	0	1	NA	0.98	-2.978	28.89	10	0.982646636	0.975317914	6.50E-17	6.50E-17	-16	-16	41	0	NA	NA	0	1	0	1	1	1	1	1	1	1	1	1
AT1G02090.1	83	R	H	NA	NA	NA	NA	ENSVATH00001936	0.025	0	NA	0.564	0.003	-1.062	2.24	-4.875	0.204135503	0.138676096	1.04415	1.0466	-0.052306074	-0.049524152	22	3	0	0	0	0	0	0	0	0	0	0	0	0	0	0
AT1G02090.1	111	P	A	NA	NA	NA	NA	ENSVATH04505964	0.0125	0	NA	0.266	0.001	-3.625	7.24	6.44	0.805605863	0.757330143	0.117725	0.117834	-5.491538966	-5.500159018	38	1	0	0	0	0	0	1	0	1	0	1	0	1	0	1
AT1G02090.1	97	Q	R	NA	NA	NA	NA	ENSVATH04505965	0.0125	0	NA	0.184	0.989	-3.899	23.44	9.26	0.899244857	0.883118541	0.0393482	0.0393831	-7.735746652	-7.744727493	40	0	0	0	0	1	0	1	1	1	1	1	1	1	0	1
AT1G02090.1	88	S	F	NA	NA	NA	NA	ENSVATH04505966	0.0125	0	NA	0.071	0.889	0.079	5.39	-4.95	0.095904902	0.097905837	1.0389	1.04178	-0.042029437	-0.039114154	5	0	0	1	0	1	0	0	0	1	0	0	0	0	0	0
AT1G02090.1	83	R	C	NA	NA	NA	NA	ENSVATH04505967	0.025	0	NA	0.208	0.008	-2.203	5.21	-5.39	0.247216499	0.225103867	1.04415	1.0466	-0.052306074	-0.049524152	22	1	0	0	0	0	0	1	0	1	0	0	0	0	0	0
AT1G02090.1	80	N	H	NA	NA	NA	NA	ENSVATH04505968	0.0125	0	NA	0.13	0.903	-4.349	4.27	7.75	0.853359635	0.832736615	0.099481	0.099552	-7.170704591	-7.180936027	36	0	0	1	0	1	0	1	0	1	0	1	0	1	0	1
AT1G02090.1	144	K	A	No effect on the interaction with CSN1, but decreased interaction with CSN8.	NA	PubMed:18854373	CSN7	SWISSPROT	NA	0	1	NA	1	-5.56	20.01	9.41	0.914414249	0.898623745	0.0332691	0.0332953	-8.570018509	-8.579928659	40	0	NA	NA	1	1	1	1	1	1	1	1	1	1	0	1
AT1G02130.1	121	N	I	Inhibits trafficking between the ER and Golgi.	NA	PubMed:11090219	RABD2A	SWISSPROT	NA	1	1	0	0.999	-8.543	22.05	10	0.983859296	0.977064892	2.30E-16	2.30E-16	-16	-16	42	0	1	1	1	1	1	1	1	1	1	1	1	1	1	1
AT1G02130.1	131	I	V	NA	NA	NA	NA	ENSVATH00002014	0.0125	1	NA	1	0	0.913	0.19	9.06	0.018366029	0.967124658	0.00953066	1.32E-16	-16	-16	1	41	0	0	0	0	0	0	0	0	1	1	0	0	1	1
AT1G02130.1	198	N	K	NA	NA	NA	NA	ENSVATH04506100	0.0125	1	NA	0.489	0	-1.254	23.4	-20	0.130865481	0.135175396	1.20797	1.24434	-0.138254169	-0.116896978	10	0	0	0	0	0	0	0	1	1	0	0	0	0	0	0
AT1G02130.1	185	P	L	NA	NA	NA	NA	ENSVATH04506102	0.0125	1	NA	0.112	0.025	-4.115	4.83	5.41	0.870598239	0.844499965	0.075643	0.0756965	-9.188991622	-9.213908966	32	0	0	1	0	0	0	1	0	1	0	1	0	1	0	1
AT1G02130.1	171	E	D	NA	NA	NA	NA	ENSVATH04506107	0.025	1	NA	0.577	0	0.042	3.17	10	0.09641771	0.069477611	0.132118	0.132261	-6.22475374	-6.249073711	8	14	0	0	0	0	0	0	0	1	1	1	0	0	0	0
AT1G02145.3	307	S	P	In ebs4-2; incomplete assembly of glycans and compromised endoplasmic reticulum-associated degradation (ERAD) of defective proteins.	ebs4-2	PubMed:20023196	ALG12	SWISSPROT	NA	0	1	0	1	-4.712	39.26	8.45	0.920687288	0.904469091	0.0542203	0.0542396	-9.32702234	-9.332326594	39	0	1	1	1	1	1	1	1	1	1	1	1	1	1	1
AT1G02145.3	38	E	K	In ebs4-3; incomplete assembly of glycans and compromised endoplasmic reticulum-associated degradation (ERAD) of defective proteins.	ebs4-3	PubMed:20023196	ALG12	SWISSPROT	NA	0	1	0	1	-3.596	5.34	8.49	0.942863974	0.926306106	0.038615	0.0386272	-11.98840418	-11.99512429	36	0	1	1	1	1	0	1	0	1	1	1	1	1	1	1
AT1G02145.3	415	D	N	NA	NA	NA	NA	ENSVATH00002041	0.025	0	NA	1	0	-0.711	1.44	0.36	0.103536592	0.05804956	0.644464	0.56974	-0.932404735	-0.646037631	10	4	0	0	0	0	0	0	0	0	0	1	0	0	0	0
AT1G02145.3	122	K	R	NA	NA	NA	NA	ENSVATH01003850	0.9375	0	NA	1	0	1.456	0.95	3.23	0.039701023	0.065190654	0.144297	0.118246	-7.710181474	-6.804634554	12	25	0	0	0	0	0	0	0	0	0	1	0	0	0	0
AT1G02145.3	262	S	T	NA	NA	NA	NA	ENSVATH01003855	0.025	0	NA	0.024	0.084	-1.496	3.34	2.29	0.495252304	0.483793926	0.356513	0.356733	-2.546084152	-2.549971175	26	0	1	1	0	1	0	1	0	1	0	1	0	1	0	1
AT1G02145.3	363	V	L	NA	NA	NA	NA	ENSVATH01003859	0.0375	0	NA	0.73	0.002	-1.369	2.39	-12.1	0.121981333	0.109387482	1.58218	1.59953	-0.694182337	-0.678097235	10	1	0	0	0	0	0	1	0	0	0	0	0	0	0	0
AT1G02145.3	434	R	Q	NA	NA	NA	NA	ENSVATH01003862	0.0375	0	NA	0.296	0.989	-3.26	12.37	4.285	0.894176709	0.872910488	0.053072	0.0530859	-9.220234657	-9.224224239	35	0	0	0	0	1	0	1	1	1	0	1	1	1	0	1
AT1G02145.3	30	M	I	NA	NA	NA	NA	ENSVATH04506178	0.0125	0	NA	0.55	0.289	-2.328	5.81	0.866	0.683768299	0.65939653	0.19178	0.191881	-5.045178817	-5.052192926	29	0	0	0	0	1	0	1	0	1	0	1	0	1	0	1
AT1G02145.3	71	F	S	NA	NA	NA	NA	ENSVATH04506183	0.0125	0	NA	0	1	-6.96	10.69	7.555	0.880255144	0.86205979	0.0780487	0.078077	-7.558466674	-7.563783267	38	0	1	1	1	1	1	1	0	1	0	1	0	1	0	1
AT1G02145.3	94	P	S	NA	NA	NA	NA	ENSVATH04506186	0.025	0	NA	0.543	0.962	-5.456	7.08	7.47	0.847263041	0.797156862	0.0986673	0.098704	-7.872558265	-7.878305585	35	1	0	0	0	1	1	1	0	1	0	1	0	1	0	1
AT1G02145.3	155	L	P	NA	NA	NA	NA	ENSVATH04506193	0.0125	0	NA	0.012	1	-6.361	22.05	6.705	0.805804095	0.783277595	0.066624	0.0666456	-6.253215614	-6.257014998	34	0	1	1	1	1	1	1	1	1	0	1	0	1	0	1
AT1G02145.3	212	A	T	NA	NA	NA	NA	ENSVATH04506201	0.0125	0	NA	0.431	0.024	-3.157	8.47	4.86	0.641791838	0.581232196	0.194302	0.19443	-4.059230085	-4.06454967	31	1	0	0	0	0	0	1	0	1	0	1	0	1	0	1
AT1G02145.3	366	F	I	NA	NA	NA	NA	ENSVATH04506214	0.0125	0	NA	0.299	0.987	-5.348	7.06	9.97	0.953413633	0.939438618	0.0218913	0.0218981	-12.29042733	-12.29649282	38	0	0	0	0	1	1	1	0	1	1	1	1	1	1	1
AT1G02145.3	379	L	F	NA	NA	NA	NA	ENSVATH04506215	0.0125	0	NA	0.138	1	-3.729	11.21	-2.13	0.887928551	0.869293259	0.0328071	0.0328126	-7.850580724	-7.870477669	38	0	0	1	1	1	0	1	1	1	0	1	0	1	0	1
AT1G02145.3	391	V	I	NA	NA	NA	NA	ENSVATH04506217	0.0125	0	NA	0.39	0.269	-0.185	2.8	0.913	0.14351963	0.143285495	0.707449	0.708182	-0.477876715	-0.480245488	9	0	0	0	0	1	0	0	0	0	0	1	0	0	0	0
AT1G02145.3	414	D	N	NA	NA	NA	NA	ENSVATH04506219	0.025	0	NA	0.618	0	1.977	0.82	0.49	0.025359437	0.061251921	0.309442	0.309629	-3.28279649	-3.288013187	8	20	0	0	0	0	0	0	0	0	0	1	0	0	0	0
AT1G02145.3	431	L	F	NA	NA	NA	NA	ENSVATH04506222	0.0125	0	NA	0.716	0.009	2.314	1.09	1.32	0.047499293	0.009021665	0.436846	0.437115	-1.605220971	-1.608019256	12	14	0	0	0	0	0	0	0	0	0	1	0	0	0	0
AT1G02145.3	443	H	N	NA	NA	NA	NA	ENSVATH04506224	0.0125	0	NA	0.532	0.021	-4.47	6.45	8.03	0.852516336	0.801460909	0.0979266	0.097962	-8.407886548	-8.414547156	34	1	0	0	0	0	0	1	0	1	1	1	0	1	0	1
AT1G02170.1	220	C	A	Loss of autoprocessing and cell death regulatory function.	NA	PubMed:15691845, PubMed:21097903	AMC1	SWISSPROT	NA	0	1	NA	0.998	-8.683	31.68	10	0.979108642	0.970923625	3.68E-17	7.84E-19	-15.11569526	-15.11569526	41	0	NA	NA	1	1	1	1	1	1	1	1	1	1	1	1
AT1G02170.1	133	R	H	NA	NA	NA	NA	ENSVATH00002055	0.075	0	NA	0.075	0.219	-3.481	6.97	7.13	0.651581767	0.613323817	0.099933	0.0999595	-6.692717953	-6.696376341	22	0	0	1	0	1	0	1	0	1	0	1	0	1	0	1
AT1G02170.1	55	Q	P	NA	NA	NA	NA	ENSVATH01003879	0.7625	0	0	0.285	0	2.454	2.24	-2.15	0.00741889	0.190445538	1.24084	0.945195	-0.051516614	-0.185331636	1	19	0	0	0	0	0	0	0	0	0	1	0	0	0	0
AT1G02170.1	63	P	T	NA	NA	NA	NA	ENSVATH01003880	0.0125	0	NA	0.258	0.165	-0.288	3.11	5.15	0.390853483	0.348322222	0.102558	0.102634	-6.511201186	-6.519993057	8	0	0	0	0	1	0	0	0	1	0	1	0	1	0	1
AT1G02170.1	31	A	P	NA	NA	NA	NA	ENSVATH04506263	0.0125	0	NA	0.039	0.511	-4.149	38.15	9.32	0.95410064	0.939044091	1.36E-16	5.61E-16	-13.02727059	-13.0371365	36	0	0	1	0	1	0	1	1	1	1	1	1	1	1	1
AT1G02170.1	237	A	T	NA	NA	NA	NA	ENSVATH04506271	0.05	0	NA	0.946	0	0.501	2.55	-2.35	0.058825837	0.026317891	0.961696	0.962964	-0.034600724	-0.0358828	6	5	0	0	0	0	0	0	0	0	0	0	0	0	0	0
AT1G02170.1	298	S	N	NA	NA	NA	NA	ENSVATH04506274	0.0125	0	NA	0.53	0.361	-0.475	NA	-0.446	0.127076503	0.129371315	0.926143	0.933303	-0.029231124	-0.032712772	9	0	0	0	0	1	0	0	NA	NA	0	1	0	0	0	0
AT1G02205.2	146	H	A	Loss of activity.	NA	PubMed:22773744	CER1	SWISSPROT	NA	0	1	NA	0.976	-9.17	35.09	10	0.983859296	0.977064892	2.00E-17	2.00E-17	-16	-16	42	0	NA	NA	0	1	1	1	1	1	1	1	1	1	1	1
AT1G02205.2	159	H	A	Loss of activity.	NA	PubMed:22773744	CER1	SWISSPROT	NA	0	1	NA	1	-9.089	35.09	10	0.983859296	0.977064892	7.84E-19	7.84E-19	-16	-16	42	0	NA	NA	1	1	1	1	1	1	1	1	1	1	1	1
AT1G02205.2	248	H	A	Loss of activity.	NA	PubMed:22773744	CER1	SWISSPROT	NA	0	1	NA	1	-9.449	35.09	10	0.983859296	0.977064892	6.50E-17	6.50E-17	-16	-16	42	0	NA	NA	1	1	1	1	1	1	1	1	1	1	1	1
AT1G02205.2	291	I	R	NA	NA	NA	NA	ENSVATH00002126	0.4125	0	0	0.486	0	-1.339	5.08	-2.75	0.045321284	0.035164743	1.14663	1.14864	-0.197062163	-0.194336057	4	6	0	0	0	0	0	1	0	1	0	0	0	0	0	0
AT1G02205.2	593	M	T	NA	NA	NA	NA	ENSVATH00002133	0.5625	0	0	0.384	0	0.042	3.84	-4.3	0.156599461	0.10912361	0.376218	0.376663	-2.47761185	-2.485728584	7	2	0	0	0	0	0	0	0	1	0	0	0	0	0	0
AT1G02205.2	607	Q	K	NA	NA	NA	NA	ENSVATH00002134	0.5625	0	0	1	0.002	1.946	0.75	5.17	0.038639385	0.295330086	0.0934609	0.0935003	-9.726343496	-9.734625268	8	28	0	0	0	0	0	0	0	0	0	1	0	0	0	1
AT1G02205.2	421	N	K	NA	NA	NA	NA	ENSVATH01004000	0.1	0	NA	1	0	3.089	1.3	-1.44	0.013252351	0.613731663	0.193947	0.168509	-6.724278736	-5.9623584	1	26	0	0	0	0	0	0	0	0	0	1	0	0	0	1
AT1G02205.2	422	H	Y	NA	NA	NA	NA	ENSVATH01004001	0.025	0	NA	0.668	0.028	-2.859	2.01	-7.53	0.115403787	0.010739284	0.279939	0.280165	-3.534330193	-3.542013704	19	14	0	0	0	0	0	1	0	0	0	0	0	0	0	0
AT1G02205.2	486	I	M	NA	NA	NA	NA	ENSVATH01004015	0.075	0	NA	0.01	0.026	-0.161	10.42	-14.8	0.481516193	0.483955313	0.0446023	0.0218659	-11.77209274	-10.25948889	2	0	1	1	0	0	0	0	0	1	0	0	0	1	0	1
AT1G02205.2	265	L	F	NA	NA	NA	NA	ENSVATH04506368	0.0125	0	NA	0.732	0.005	0.335	3.14	-11.6	0.065015373	0.034926791	0.2321	0.232141	-4.80730434	-4.80969352	10	16	0	0	0	0	0	0	0	1	0	0	0	0	0	0
AT1G02205.2	298	T	S	NA	NA	NA	NA	ENSVATH04506369	0.1125	0	0	0.05	0.595	-3.371	11.33	7.55	0.981423163	0.973786987	1.36E-16	2.11E-16	-15.67567227	-15.67567227	41	0	0	1	0	1	0	1	1	1	0	1	1	1	1	1
AT1G02205.2	357	K	T	NA	NA	NA	NA	ENSVATH04506372	0.0125	0	NA	0.16	0.056	-3.537	7.12	6.45	0.785672312	0.759337052	0.157252	0.15729	-6.794200378	-6.798018746	31	0	0	0	0	1	0	1	0	1	0	1	0	1	0	1
AT1G02205.2	452	V	L	NA	NA	NA	NA	ENSVATH04506375	0.0125	0	NA	0.816	0.05	0.729	2.24	-10.5	0.089966557	0.00854054	0.426265	0.426632	-2.036713317	-2.041640173	20	14	0	0	0	1	0	0	0	0	0	0	0	0	0	0
AT1G02205.2	534	P	Q	NA	NA	NA	NA	ENSVATH04506383	0.025	0	NA	0.679	1	-7.445	17.67	7.48	0.980031188	0.971797536	7.84E-19	4.66E-16	-15.67567227	-15.67567227	40	0	0	0	1	1	1	1	1	1	0	1	1	1	1	1
AT1G02280.1	181	S	D	According to PubMed:16412428, supposed to mimic the effects of phosphoserine, but normal activity.	NA	PubMed:12741849, PubMed:16412428	TOC33	SWISSPROT	NA	1	1	NA	0.869	-2.592	32.3	3.145	0.407441249	0.384159079	0.239521	0.239579	-3.872869274	-3.875147045	17	0	NA	NA	0	1	0	1	1	1	0	1	0	1	0	1
AT1G02280.1	130	R	A	Loss of homidimerization and heterodimerization with TOC159, reduction of GTPase activity.	NA	PubMed:12869544, PubMed:17337454, PubMed:18541539	TOC33	SWISSPROT	NA	1	1	NA	1	-5.707	25.85	5.29	0.973640318	0.96460621	7.84E-19	7.84E-19	-13.65377616	-13.65814227	42	0	NA	NA	1	1	1	1	1	1	0	1	1	1	1	1
AT1G02280.1	181	S	A	Loss of phosphorylation, normal activity.	NA	PubMed:12741849, PubMed:16412428	TOC33	SWISSPROT	NA	1	1	1	0	0.94	2.78	3.145	0.043396827	0.005986037	0.239521	0.239579	-3.872869274	-3.875147045	17	22	0	0	0	0	0	0	0	0	0	1	0	0	0	0
AT1G02280.1	228	A	V	NA	NA	NA	NA	ENSVATH04506926	0.0375	1	NA	0.877	0.073	-1.084	4.88	9.02	0.821448595	0.790678799	0.0679149	0.0679264	-8.460937696	-8.462970893	29	0	0	0	0	1	0	0	0	1	1	1	0	1	0	1
AT1G02280.1	24	E	D	NA	NA	NA	NA	ENSVATH04506934	0.0125	1	NA	0.152	0	-1.76	3.54	-4.12	0.864079981	0.791619332	0.111609	0.11163	-8.069349931	-8.072343277	38	2	0	1	0	0	0	1	0	1	0	0	0	1	0	1
AT1G02280.1	181	S	T	Phosphothreonine instead of phosphoserine.	NA	PubMed:12741849, PubMed:16412428	TOC33	SWISSPROT	NA	1	1	0.046	0.002	-1.246	4.42	3.145	0.407441249	0.384159079	0.239521	0.239579	-3.872869274	-3.875147045	17	0	0	1	0	0	0	0	0	1	0	1	0	1	0	1
AT1G02500.1	114	C	R	Loss of the NO-mediated inhibition by S-nitrosylation.	NA	PubMed:16365035	SAM1	SWISSPROT	NA	1	1	0.548	0	2.464	0.93	0.581	0.003495438	0.821495146	0.130393	0.101039	-7.518745175	-6.556859102	1	38	0	0	0	0	0	0	0	0	0	1	0	0	0	1
AT1G02740.1	87	Y	A	Loss of H3K4me3/H3K36me3 binding capacity and loss of activity.	NA	PubMed:25211338	MRG2	SWISSPROT	NA	0	1	NA	0.953	-7.586	6.22	6.5	0.900744358	0.880882421	0.0999949	0.100046	-9.249252462	-9.25864738	36	0	NA	NA	0	1	1	1	0	1	0	1	1	1	0	1
AT1G02740.1	5	N	S	NA	NA	NA	NA	ENSVATH01006795	0.2	0	0	0.744	0.004	-1.22	1.82	-5.74	0.019806784	0.026092261	2.29114	2.31137	-1.721385853	-1.700505776	8	16	0	0	0	0	0	0	0	0	0	0	0	0	0	0
AT1G02740.1	272	L	F	NA	NA	NA	NA	ENSVATH04509753	0.0125	0	NA	0.009	1	-3.888	9.39	8.81	0.970757196	0.96047182	0.0178372	0.0178451	-13.85456118	-13.86503601	40	0	1	1	1	1	0	1	0	1	1	1	1	1	1	1
AT1G02740.1	229	L	F	NA	NA	NA	NA	ENSVATH04509755	0.0125	0	NA	0.013	0.998	-3.302	8.3	-5.88	0.776816076	0.750425878	0.123078	0.123149	-6.51506698	-6.522878745	31	0	1	1	1	1	0	1	0	1	0	0	0	1	0	1
AT1G02740.1	164	N	T	NA	NA	NA	NA	ENSVATH04509763	0.2375	0	0	0.313	0.087	-1.766	3.9	6.27	0.422239798	0.382520845	0.197068	0.197233	-6.173826034	-6.185956277	11	0	0	0	0	1	0	1	0	1	0	1	0	1	0	1
AT1G02740.1	42	L	P	NA	NA	NA	NA	ENSVATH04509778	0.025	0	NA	0.313	0.787	1.217	NA	-4.205	0.050082996	0.032008732	1.05737	1.08198	-0.029889865	-0.021289155	4	5	0	0	0	1	0	0	NA	NA	0	0	0	0	0	0
AT1G02740.1	11	D	N	NA	NA	NA	NA	ENSVATH04509779	0.0125	0	NA	0.031	0.175	-1.21	2.31	2.94	0.329686137	0.245577499	0.250964	0.25139	-2.775554997	-2.786256522	19	2	1	1	0	1	0	0	0	0	0	1	0	1	0	0
AT1G02860.1	55	S	F	In bah1-2; loss of activity.	bah1-2	PubMed:18753285	BAH1	SWISSPROT	NA	0	1	0.035	0.09	-1.957	7.14	1.4675	0.259887595	0.231911344	0.19256	0.192645	-5.160291982	-5.166030357	4	0	1	1	0	1	0	1	0	1	0	1	0	0	0	0
AT1G02860.1	74	E	K	In bah1-4; loss of activity.	bah1-4	PubMed:18753285	BAH1	SWISSPROT	NA	0	1	0.007	0.556	-0.133	6.07	7.63	0.564275071	0.499366199	0.0672783	0.0673092	-9.760998246	-9.769126955	8	0	1	1	0	1	0	0	0	1	0	1	0	1	0	1
AT1G02860.1	156	V	I	In bah1-5; loss of activity.	bah1-5	PubMed:18753285	BAH1	SWISSPROT	NA	0	1	0.207	0.084	-0.716	3.48	5.76	0.419714035	0.337723073	0.157205	0.157263	-6.670982676	-6.676863452	11	1	0	0	0	1	0	0	0	1	0	1	0	1	0	1
AT1G02860.1	160	R	Q	In bah1-6; loss of activity.	bah1-6	PubMed:18753285	BAH1	SWISSPROT	NA	0	1	0.157	0.009	0.229	3.7	5.795	0.535686415	0.471695709	0.0959744	0.0959988	-9.595975611	-9.600987567	7	0	0	1	0	0	0	0	0	1	0	1	0	1	0	1
AT1G02860.1	162	E	K	In bah1-7; loss of activity.	bah1-7	PubMed:18753285	BAH1	SWISSPROT	NA	0	1	0	0.996	-3.463	9.24	6.69	0.95799796	0.944677	0.0190827	0.0190899	-12.79265382	-12.80049988	38	0	1	1	1	1	0	1	0	1	0	1	1	1	1	1
AT1G02860.1	181	E	K	In bah1-9; loss of activity.	bah1-9	PubMed:18753285	BAH1	SWISSPROT	NA	0	1	0.381	0.879	-2.756	2.63	3.75	0.580920757	0.513102363	0.231545	0.23168	-4.616055442	-4.622932458	26	1	0	0	0	1	0	1	0	0	0	1	0	1	0	1
AT1G02860.1	210	D	G	NA	NA	NA	NA	ENSVATH00003373	0.0125	0	NA	0.465	0.075	-4.535	4.3	8.66	0.920490358	0.86486091	0.074648	0.0746724	-11.17535489	-11.1835764	37	2	0	0	0	1	1	1	0	1	1	1	1	1	0	1
AT1G02860.1	113	H	N	NA	NA	NA	NA	ENSVATH04510547	0.0125	0	NA	0.491	0.001	0.581	2.67	-1.28	0.088758448	0.091767044	0.675159	0.614653	-0.918861607	-0.668339927	1	0	0	0	0	0	0	0	0	0	0	1	0	0	0	0
AT1G02860.1	190	I	K	NA	NA	NA	NA	ENSVATH04510551	0.0125	0	NA	0.128	0.002	0.25	NA	0.369	0.018418449	0.05167789	10	4.46888	-0.629527622	-1.933141319	1	0	0	1	0	0	0	0	NA	NA	0	1	0	0	0	0
AT1G02900.1	69	R	A	Loss of propeptide cleavage by kexin-like convertase leading to an impaired activity.	NA	PubMed:18775699	RALF1	SWISSPROT	NA	1	1	NA	0.999	-6	14.8	7.185	0.979923107	0.971402791	0.00587311	0.00587252	-16	-16	39	0	NA	NA	1	1	1	1	1	1	0	1	1	1	1	1
AT1G02900.1	28	F	V	NA	NA	NA	NA	ENSVATH04510879	0.0125	1	NA	0.645	0.133	0.184	4.22	-4.7	0.110697532	0.079586117	0.353146	0.354418	-0.236420779	-0.249653628	8	2	0	0	0	1	0	0	0	1	0	0	0	0	0	0
AT1G02900.1	5	F	Y	NA	NA	NA	NA	ENSVATH04510880	0.0125	1	NA	1	0.462	-0.393	2.99	-17.3	0.111636434	0.09828416	1.04016	1.0655	-0.052662363	-0.032414586	9	1	0	0	0	1	0	0	0	1	0	0	0	0	0	0
AT1G03000.1	766	R	Q	In pex6-1; Loss of sensitivity to exogenous indole-3-butyric acid (IBA)and decreased number of peroxisomes. Larger size of the peroxisomes.	pex6-1	http://www.pnas.org/content/101/6/1786.full	PEX6	BOTH	NA	0	1	0	1	-3.515	14.43	9.45	0.932770925	0.917944652	5.61E-16	4.68E-16	-9.766815736	-9.769471636	40	0	1	1	1	1	0	1	1	1	1	1	1	1	1	1
AT1G03000.1	887	K	N	NA	NA	NA	NA	ENSVATH00003549	0.075	0	NA	0.484	0	1.096	2.24	-1.49	0.061994535	0.075635499	0.541051	0.540399	-1.273930842	-1.270278924	2	5	0	0	0	0	0	0	0	0	0	1	0	0	0	0
AT1G03000.1	504	G	A	NA	NA	NA	NA	ENSVATH01007828	0.0125	0	NA	0.809	0.01	-0.533	4.44	5.74	0.202094861	0.169931902	0.453447	0.453654	-1.709582488	-1.711714995	12	1	0	0	0	0	0	0	0	1	0	1	0	0	0	0
AT1G03000.1	894	P	R	NA	NA	NA	NA	ENSVATH04511430	0.0375	0	NA	0.564	0	-0.654	8.67	-15.25	0.115182472	0.121505922	2.65282	2.65937	-2.555128021	-2.547644597	5	0	0	0	0	0	0	0	0	1	0	0	0	0	0	0
AT1G03000.1	886	S	L	NA	NA	NA	NA	ENSVATH04511431	0.0125	0	NA	0.309	0	2.249	1.32	1.74	0.010173728	0.128395129	0.402778	0.403268	-1.797176692	-1.801895753	5	23	0	0	0	0	0	0	0	0	0	1	0	0	0	0
AT1G03000.1	869	M	L	NA	NA	NA	NA	ENSVATH04511434	0.0125	0	NA	1	0.358	-2.479	3.94	8.84	0.893166325	0.868669926	0.0756913	0.0757141	-10.22450752	-10.22955671	32	0	0	0	0	1	0	1	0	1	1	1	1	1	0	1
AT1G03000.1	728	I	M	NA	NA	NA	NA	ENSVATH04511439	0.025	0	NA	0.011	1	-2.693	11.81	-5.68	0.928954381	0.913196073	0.0327792	0.0327889	-9.864183516	-9.868111669	39	0	1	1	1	1	0	1	1	1	0	0	1	1	1	1
AT1G03000.1	627	T	S	NA	NA	NA	NA	ENSVATH04511446	0.0125	0	NA	0.493	0.02	-0.092	3.99	-2.565	0.116909426	0.120021717	1.10628	1.10772	-0.107754534	-0.106331985	8	0	0	0	0	0	0	0	0	1	0	0	0	0	0	0
AT1G03000.1	508	L	M	NA	NA	NA	NA	ENSVATH04511451	0.05	0	NA	0.105	0.99	-1.594	7.81	-1.81	0.552971554	0.494995448	0.208962	0.209045	-3.033325234	-3.035582902	29	1	0	1	0	1	0	1	0	1	0	1	0	1	0	1
AT1G03000.1	487	E	V	NA	NA	NA	NA	ENSVATH04511456	0.025	0	NA	0.123	0.315	-2.214	8.3	-3.52	0.253987174	0.260146368	0.871093	0.871931	-0.161505413	-0.162909266	20	0	0	1	0	1	0	1	0	1	0	0	0	0	0	0
AT1G03000.1	475	L	F	NA	NA	NA	NA	ENSVATH04511458	0.025	0	NA	0.927	0.001	4.567	1.4	7.29	0.040307392	0.125733811	0.129712	0.129747	-6.506118318	-6.509149954	8	22	0	0	0	0	0	0	0	0	0	1	0	0	0	0
AT1G03000.1	463	G	D	NA	NA	NA	NA	ENSVATH04511459	0.0125	0	NA	0.116	1	-6.942	11.54	9	0.923516658	0.909107816	0.0610829	0.0610994	-8.830651821	-8.834224604	41	0	0	1	1	1	1	1	1	1	1	1	1	1	1	1
AT1G03000.1	380	V	I	NA	NA	NA	NA	ENSVATH04511464	0.0125	0	NA	0.302	0.864	-0.758	4.55	7.54	0.651511183	0.587851411	0.155035	0.155088	-4.567210233	-4.570102441	30	1	0	0	0	1	0	0	0	1	0	1	0	1	0	1
AT1G03000.1	273	I	V	NA	NA	NA	NA	ENSVATH04511465	0.025	0	NA	1	0	0.267	1.54	-10.6	0.008223336	0.023996487	0.639587	0.640134	-0.689542481	-0.691764366	11	26	0	0	0	0	0	0	0	0	0	0	0	0	0	0
AT1G03000.1	222	H	Y	NA	NA	NA	NA	ENSVATH04511468	0.0125	0	NA	0.168	0.977	-4.901	5.75	8.89	0.910968822	0.893531044	0.0848503	0.0848745	-9.112188042	-9.116219874	38	0	0	0	0	1	1	1	0	1	1	1	1	1	0	1
AT1G03000.1	196	I	T	NA	NA	NA	NA	ENSVATH04511469	0.025	0	NA	0.369	0	1.606	2.6	-20	0.138563764	0.13536773	6.28098	6.34057	-7.971876281	-7.946771689	4	1	0	0	0	0	0	0	0	0	0	0	0	0	0	0
AT1G03000.1	132	S	A	NA	NA	NA	NA	ENSVATH04511471	0.025	0	NA	0.582	0.005	-1.331	4.25	-1.849	0.26907001	0.244032731	0.903243	0.904157	-0.102153618	-0.103365774	23	1	0	0	0	0	0	1	0	1	0	1	0	0	0	0
AT1G03160.1	362	K	M	Loss of function and no detection in punctate structures.	NA	PubMed:16617119	FZL	SWISSPROT	NA	0	1	NA	1	-5.783	17.24	9.29	0.954970111	0.941659418	5.61E-16	7.84E-19	-12.0873051	-12.09750486	39	0	NA	NA	1	1	1	1	1	1	1	1	1	1	1	1
AT1G03160.1	25	P	R	NA	NA	NA	NA	ENSVATH00003770	0.2375	0	0	0.225	0.482	-1.044	26.29	-1.115	0.142980036	0.140931403	0.568098	0.569332	-0.665019785	-0.670162963	8	0	0	0	0	1	0	0	1	1	0	1	0	0	0	0
AT1G03160.1	88	D	E	NA	NA	NA	NA	ENSVATH00003773	0.025	0	NA	1	0.056	-0.862	2.06	-12.8	0.127118201	0.025403786	0.512615	0.513804	-0.92965177	-0.936014001	22	10	0	0	0	1	0	0	0	0	0	0	0	0	0	0
AT1G03160.1	269	V	A	NA	NA	NA	NA	ENSVATH00003776	0.2125	0	0	0.853	0.002	0.75	4.7	5.14	0.149219387	0.146379922	0.556754	0.557578	-0.888663542	-0.893098896	8	0	0	0	0	0	0	0	0	1	0	1	0	0	0	0
AT1G03160.1	643	D	N	NA	NA	NA	NA	ENSVATH00003787	0.225	0	0	0.415	0.245	-2.533	2.05	7.53	0.389669193	0.295006902	0.229671	0.229919	-3.288294821	-3.296638109	21	2	0	0	0	1	0	1	0	0	0	1	0	1	0	1
AT1G03160.1	543	I	V	NA	NA	NA	NA	ENSVATH01008297	0.7875	0	0	0.596	0	-0.198	2.43	-19.7	0.023039518	0.092358749	2.09777	1.86804	-1.066586619	-1.415100267	2	11	0	0	0	0	0	0	0	0	0	0	0	0	0	0
AT1G03160.1	544	A	S	NA	NA	NA	NA	ENSVATH01008298	0.7875	0	0	0.8	0	1.201	2.17	-3.04	0.009721912	0.167478786	1.31055	1.17013	-0.191914673	-0.371763355	1	17	0	0	0	0	0	0	0	0	0	0	0	0	0	0
AT1G03160.1	714	E	G	NA	NA	NA	NA	ENSVATH01008301	0.4875	0	0	0.024	0.223	-4.525	4.13	4.28	0.59633155	0.493327477	0.268479	0.268707	-3.803928877	-3.811501807	31	2	1	1	0	1	1	1	0	1	0	1	0	1	0	1
AT1G03160.1	741	Y	S	NA	NA	NA	NA	ENSVATH01008302	0.0125	0	NA	0.416	0.153	-1.806	2.02	-1.922	0.232870871	0.20624113	0.729725	0.731005	-0.409378822	-0.412833647	19	1	0	0	0	1	0	1	0	0	0	1	0	0	0	0
AT1G03160.1	3	T	S	NA	NA	NA	NA	ENSVATH04512424	0.025	0	NA	NA	0.007	0.083	2.03	2.335	0.087250953	0.031657228	0.390827	0.391557	-1.355735754	-1.362187172	8	6	NA	NA	0	0	0	0	0	0	0	1	0	0	0	0
AT1G03160.1	181	S	W	NA	NA	NA	NA	ENSVATH04512426	0.0125	0	NA	0.004	1	-6.019	3.94	6.585	0.641556841	0.630117057	0.235179	0.235374	-2.826930336	-2.832532018	33	0	1	1	1	1	1	1	0	1	0	1	0	1	0	1
AT1G03160.1	303	K	N	NA	NA	NA	NA	ENSVATH04512428	0.0125	0	NA	0.355	0.23	-3.131	4.79	-3.22	0.562152158	0.464857019	0.299943	0.300279	-2.833797899	-2.841405343	32	2	0	0	0	1	0	1	0	1	0	0	0	1	0	1
AT1G03160.1	738	I	K	NA	NA	NA	NA	ENSVATH04512458	0.0125	0	NA	0.72	0.074	-1.478	23.91	-1.9	0.124189116	0.125419336	0.843772	0.846507	-0.170950444	-0.175073381	8	0	0	0	0	1	0	1	1	1	0	1	0	0	0	0
AT1G03160.1	748	D	N	NA	NA	NA	NA	ENSVATH04512459	0.0125	0	NA	0.496	0.007	-1.938	3.49	1.48	0.271781348	0.109285654	0.255693	0.255925	-3.458725368	-3.466758109	20	6	0	0	0	0	0	1	0	1	0	1	0	0	0	0
AT1G03160.1	826	A	T	NA	NA	NA	NA	ENSVATH04512465	0.0125	0	NA	0.453	0.529	-0.837	4.18	-3.18	0.153057699	0.16184235	2.21959	2.23196	-1.610300681	-1.598191208	11	0	0	0	0	1	0	0	0	1	0	0	0	0	0	0
AT1G03160.1	829	G	V	NA	NA	NA	NA	ENSVATH04512466	0.0125	0	NA	0.264	0.005	-1.121	9.92	5.14	0.161389131	0.156671248	0.492744	0.493425	-1.260075774	-1.265443379	8	0	0	0	0	0	0	0	0	1	0	1	0	0	0	0
AT1G03160.1	871	E	K	NA	NA	NA	NA	ENSVATH04512467	0.0125	0	NA	0.395	0.359	-0.539	5.08	7.04	0.24221332	0.229482302	0.275693	0.27606	-2.387552057	-2.395327998	11	0	0	0	0	1	0	0	0	1	0	1	0	0	0	0
AT1G03190.1	521	G	E	In uvh6-1; confers increased sensitivity to UV light and heat, yellow-green leaf coloration, and mild growth defects.	uvh6-1	PubMed:12857822	XPD	SWISSPROT	NA	0	1	0.043	1	-7.993	35.36	7.79	0.978619511	0.970323608	7.84E-19	2.11E-16	-15.00516482	-15.00516482	41	0	0	1	1	1	1	1	1	1	0	1	1	1	1	1
AT1G03190.1	426	P	A	NA	NA	NA	NA	ENSVATH00003852	0.1375	0	0	0.744	0.999	-6.259	7.86	7.79	0.969947215	0.959542936	0.0138152	0.0138167	-13.72439384	-13.72953778	40	0	0	0	1	1	1	1	0	1	0	1	1	1	1	1
AT1G03190.1	95	V	L	NA	NA	NA	NA	ENSVATH04512608	0.025	0	NA	0.263	0	-0.647	3.01	-10.9	0.10232377	0.03360836	0.722956	0.723644	-0.32507092	-0.326501724	16	7	0	0	0	0	0	0	0	1	0	0	0	0	0	0
AT1G03190.1	263	L	V	NA	NA	NA	NA	ENSVATH04512611	0.025	0	NA	0.512	0.095	-1.26	7.94	-2.97	0.878976618	0.835723474	0.0574504	0.0574588	-8.40679259	-8.409638617	37	1	0	0	0	1	0	0	0	1	0	0	0	1	0	1
AT1G03190.1	525	V	A	NA	NA	NA	NA	ENSVATH04512634	0.0125	0	NA	0.17	0.12	-3.113	4.5	4.96	0.557149523	0.512748748	0.101554	0.10157	-6.908727075	-6.911371399	16	0	0	0	0	1	0	1	0	1	0	1	0	1	0	1
AT1G03190.1	563	Q	E	NA	NA	NA	NA	ENSVATH04512638	0.0125	0	NA	0.311	0.017	-1.659	4	7.47	0.962639417	0.940606751	0.0352952	0.0352987	-13.95938975	-13.96380242	38	1	0	0	0	0	0	1	0	1	0	1	1	1	1	1
AT1G03430.1	83	H	K	Impaired AHK4 binding.	NA	PubMed:16965536	AHP5	SWISSPROT	NA	1	1	NA	1	-8.779	23.46	10	0.982646636	0.975317914	7.84E-19	7.84E-19	-16	-16	41	0	NA	NA	1	1	1	1	1	1	1	1	1	1	1	1
AT1G03430.1	22	Q	H	NA	NA	NA	NA	ENSVATH04513703	0.0125	1	NA	0.185	0.005	-1.075	2.78	-10.6	0.14108849	0.102152195	0.57734	0.579198	-1.060226236	-1.072955223	10	2	0	0	0	0	0	0	0	0	0	0	0	0	0	0
AT1G03430.1	48	V	G	NA	NA	NA	NA	ENSVATH04513707	0.0375	1	NA	0	1	-6.949	12.95	8.8	0.904456592	0.888431032	0.0908408	0.0909453	-8.051085533	-8.069546128	40	0	1	1	1	1	1	1	1	1	1	1	1	1	0	1
AT1G03430.1	141	E	D	NA	NA	NA	NA	ENSVATH04513730	0.0375	1	NA	0.084	0.975	-2.595	4.68	6.85	0.70246819	0.680766444	0.235922	0.236323	-4.797149468	-4.816858328	31	0	0	1	0	1	0	1	0	1	0	1	0	1	0	1
AT1G04240.1	69	P	S	In shy2-2; gain of function. Affects auxin-related developmental processes. Affects photomorphogenesis.	shy2-2	http://dev.biologists.org/content/develop/126/4/711.full.pdf	IAA3	BOTH	NA	1	1	0	0.999	-7.765	17.5	10	0.983859296	0.977064892	2.30E-16	7.84E-19	-16	-16	42	0	1	1	1	1	1	1	1	1	1	1	1	1	1	1
AT1G04240.1	67	G	E	In shy2-3; gain of function. Affects auxin-related developmental processes. Affects photomorphogenesis.	shy2-3	http://dev.biologists.org/content/develop/126/4/711.full.pdf	IAA3	BOTH	NA	1	1	0	1	-7.827	6.03	10	0.975437149	0.966408212	0.0128546	0.0128569	-14.34285902	-14.35360902	41	0	1	1	1	1	1	1	0	1	1	1	1	1	1	1
AT1G04240.1	45	E	A	NA	NA	NA	NA	ENSVATH00005146	0.2375	1	0	0.432	0.038	-1.256	3.21	-1.99	0.141225497	0.146035811	1.22232	1.2274	-0.202575255	-0.19849819	11	0	0	0	0	0	0	0	0	1	0	1	0	0	0	0
AT1G04240.1	47	E	Q	NA	NA	NA	NA	ENSVATH01011233	0.0375	1	NA	0.219	0.46	-0.991	2.08	-0.586	0.26221562	0.269723159	0.922074	0.924879	-0.065424292	-0.068391627	21	0	0	0	0	1	0	0	0	0	0	1	0	0	0	0
AT1G04240.1	168	I	M	NA	NA	NA	NA	ENSVATH04517003	0.0125	1	NA	0.067	0.03	-0.318	4.97	-17.8	0.122537162	0.015958232	0.243473	0.245993	-2.911435146	-3.014295613	18	12	0	1	0	0	0	0	0	1	0	0	0	0	0	0
AT1G04240.1	144	D	E	NA	NA	NA	NA	ENSVATH04517004	0.0125	1	NA	1	0.001	0.181	1.75	-20	0.150419338	0.005748497	0.144433	0.144494	-6.685810341	-6.694444431	22	19	0	0	0	0	0	0	0	0	0	0	0	0	0	0
AT1G04240.1	63	A	S	NA	NA	NA	NA	ENSVATH04517005	0.0125	1	NA	0.121	0.409	-2.084	8.82	7.66	0.916747211	0.89943418	0.0515887	0.0516003	-9.420873943	-9.42752095	38	0	0	1	0	1	0	1	0	1	0	1	1	1	0	1
AT1G04240.1	58	S	A	NA	NA	NA	NA	ENSVATH04517006	0.0125	1	NA	1	0	1.514	2.35	0.715	0.038682352	0.061418757	0.174306	0.174389	-3.224384456	-3.230138425	7	16	0	0	0	0	0	0	0	0	0	1	0	0	0	0
AT1G04240.1	2	D	Y	NA	NA	NA	NA	ENSVATH04517007	0.0625	1	NA	0.016	0.999	-1.377	4.69	-4.23	0.228007841	0.196290255	0.501648	0.502399	-1.093925829	-1.098672477	16	1	1	1	1	1	0	1	0	1	0	0	0	0	0	0
AT1G04240.1	70	P	L	NA	shy2-6	http://www.sciencedirect.com/science/article/pii/S1360138501020428	IAA3	MANUAL	NA	1	1	0	1	-9.783	26.92	10	0.983859296	0.977064892	2.30E-16	7.84E-19	-16	-16	42	0	1	1	1	1	1	1	1	1	1	1	1	1	1	1
AT1G04250.1	88	P	L	In axr3-1; gain of function. Affects auxin-related developmental processes. Affects photomorphogenesis.;	axr3-1	http://www.sciencemag.org/content/279/5355/1371.full	AXR3	BOTH	NA	1	1	0	1	-8.78	26.92	10	0.981423163	0.973786987	1.14E-16	2.00E-17	-15.67567227	-15.67567227	41	0	1	1	1	1	1	1	1	1	1	1	1	1	1	1
AT1G04250.1	89	V	G	In axr3-3; gain of function. Affects auxin-related developmental processes. Affects photomorphogenesis.;	axr3-3	http://www.sciencemag.org/content/279/5355/1371.full	AXR3	BOTH	NA	1	1	0	1	-6.278	17.34	10	0.959876375	0.947701185	0.0200441	0.0200632	-12.31551191	-12.33561097	40	0	1	1	1	1	1	1	1	1	1	1	1	1	1	1
AT1G04250.1	4	S	C	NA	NA	NA	NA	ENSVATH04517130	0.0125	1	NA	0.031	0.206	-0.624	3.64	-5.695	0.132183646	0.136804316	1.48674	1.49875	-0.800996715	-0.783266849	9	0	1	1	0	1	0	0	0	1	0	0	0	0	0	0
AT1G04250.1	85	G	E	NA	axr3-101	http://pcp.oxfordjournals.org/content/49/7/1025.full	AXR3	MANUAL	NA	1	1	0	1	-7.015	35.36	10	0.980693495	0.972879831	2.11E-16	5.61E-16	-15.49208344	-15.49208344	41	0	1	1	1	1	1	1	1	1	1	1	1	1	1	1
AT1G04310.1	67	P	L	In ers2-1; ethylene insensitivity.	ers2-1	PubMed:9707532	ERS2	SWISSPROT	NA	0	1	0	1	-9.624	26.92	10	0.982646636	0.975317914	3.68E-17	2.00E-17	-16	-16	41	0	1	1	1	1	1	1	1	1	1	1	1	1	1	1
AT1G04310.1	94	I	F	In ers2-2; ethylene insensitivity.	ers2-2	PubMed:9707532	ERS2	SWISSPROT	NA	0	1	0	0.998	-3.854	10.65	10	0.982646636	0.975317914	4.36E-17	4.36E-17	-16	-16	41	0	1	1	1	1	0	1	0	1	1	1	1	1	1	1
AT1G04310.1	560	T	A	NA	NA	NA	NA	ENSVATH00005294	0.5375	0	0	0.728	0	-0.175	3.8	3.07	0.070894647	0.065731631	0.449696	0.402941	-1.925344439	-1.509739447	3	5	0	0	0	0	0	0	0	1	0	1	0	0	0	0
AT1G04310.1	555	F	V	NA	NA	NA	NA	ENSVATH00005295	0.0125	0	NA	0.039	0.992	-2.718	16.65	10	0.981296978	0.973393766	0.0126329	0.0126402	-16	-16	40	0	0	1	0	1	0	1	1	1	1	1	1	1	1	1
AT1G04310.1	396	C	R	NA	NA	NA	NA	ENSVATH00005305	0.6125	0	0	1	0	7.019	0.33	5.44	0.015456185	0.950890572	0.0341695	0.0222975	-15.00516482	-13.47043106	1	38	0	0	0	0	0	0	0	0	0	1	0	0	1	1
AT1G04310.1	531	V	A	NA	NA	NA	NA	ENSVATH01011489	0.125	0	0	0.57	0.904	0.004	3.94	3.33	0.237897334	0.140671497	0.221685	0.221878	-4.642110871	-4.654679212	9	3	0	0	0	1	0	0	0	1	0	1	0	0	0	0
AT1G04310.1	509	L	I	NA	NA	NA	NA	ENSVATH01011491	0.5375	0	0	0.066	0.423	-1.502	5.53	2.09	0.954844271	0.942068042	0.0175621	0.0175703	-11.74499781	-11.75629241	40	0	0	1	0	1	0	1	0	1	0	1	1	1	1	1
AT1G04310.1	635	F	Y	NA	NA	NA	NA	ENSVATH04517377	0.0125	0	NA	1	0	-0.094	2.86	4.98	0.102939739	0.043793933	0.392762	0.393559	-1.973152262	-1.984900228	7	5	0	0	0	0	0	0	0	0	0	1	0	0	0	0
AT1G04310.1	623	M	I	NA	NA	NA	NA	ENSVATH04517378	0.025	0	NA	1	0	1.689	0.97	-19.1	0.024612305	0.232478102	0.224159	0.195953	-4.299576675	-3.629466556	3	18	0	0	0	0	0	0	0	0	0	0	0	0	0	0
AT1G04310.1	623	M	V	NA	NA	NA	NA	ENSVATH04517379	0.025	0	NA	0.196	0	1.11	2.4	0.759	0.124589741	0.095595649	0.224159	0.195953	-4.299576675	-3.629466556	3	4	0	0	0	0	0	0	0	0	0	1	0	0	0	0
AT1G04310.1	501	A	T	NA	NA	NA	NA	ENSVATH04517385	0.2375	0	0	0.006	0.084	-0.024	13.45	7.82	0.388906547	0.394731727	0.0490012	0.0309703	-10.26604799	-8.841272703	1	0	1	1	0	1	0	0	1	1	0	1	0	1	0	1
AT1G04310.1	479	F	Y	NA	NA	NA	NA	ENSVATH04517388	0.025	0	NA	0.028	0.992	-2.74	13.32	10	0.98129695	0.97339374	0.0126401	0.0126471	-16	-16	40	0	1	1	0	1	0	1	1	1	1	1	1	1	1	1
AT1G04310.1	452	T	A	NA	NA	NA	NA	ENSVATH04517390	0.0125	0	NA	0.023	0	-0.319	4.67	6.67	0.235007957	0.140362164	0.222431	0.223255	-3.839777649	-3.891712418	11	3	1	1	0	0	0	0	0	1	0	1	0	0	0	0
AT1G04310.1	449	A	S	NA	NA	NA	NA	ENSVATH04517391	0.025	0	NA	0.785	0.004	0.517	3.41	4.81	0.216105262	0.089236833	0.140428	0.140537	-7.323472825	-7.339595611	6	7	0	0	0	0	0	0	0	1	0	1	0	0	0	0
AT1G04310.1	442	I	L	NA	NA	NA	NA	ENSVATH04517392	0.0125	0	NA	0.148	0.061	-0.573	2.43	8.83	0.409271387	0.384607351	0.195725	0.196061	-3.849470742	-3.868458322	17	0	0	1	0	1	0	0	0	0	1	1	0	1	0	1
AT1G04310.1	412	G	R	NA	NA	NA	NA	ENSVATH04517394	0.0125	0	NA	0.305	0.999	-0.275	3.81	7.85	0.281226224	0.262795785	0.300171	0.300542	-3.350415932	-3.364124359	11	0	0	0	1	1	0	0	0	1	0	1	0	0	0	0
AT1G04310.1	326	A	T	NA	NA	NA	NA	ENSVATH04517397	0.0125	0	NA	0.792	0.001	0.071	1.76	4.16	0.093377208	0.09833559	0.425529	0.379545	-2.294827605	-1.84461841	1	2	0	0	0	0	0	0	0	0	0	1	0	0	0	0
AT1G04310.1	61	I	V	NA	NA	NA	NA	ENSVATH04517408	0.075	0	NA	1	0	0.552	1.71	3.67	0.031885107	0.103662124	0.157507	0.157683	-5.382711274	-5.399220893	8	22	0	0	0	0	0	0	0	0	0	1	0	0	0	0
AT1G04310.1	38	D	E	NA	NA	NA	NA	ENSVATH04517409	0.05	0	NA	0.122	0.993	-2.789	4.38	-1.74	0.912779879	0.868797061	0.0505565	0.050591	-12.15594614	-12.17731487	31	1	0	1	1	1	0	1	0	1	0	1	1	1	0	1
AT1G04310.1	25	A	E	NA	NA	NA	NA	ENSVATH04517410	0.05	0	NA	0.122	0	-0.954	NA	-5.37	0.042059039	0.044725035	6.72588	8.67122	-1.867621825	-1.726582005	4	0	0	1	0	0	0	0	NA	NA	0	0	0	0	0	0
AT1G04310.1	3	K	N	NA	NA	NA	NA	ENSVATH04517411	0.0625	0	NA	0.023	0.002	-2.466	2.25	0.321	0.246387505	0.227694252	0.279124	0.27965	-3.521947459	-3.537627462	8	0	1	1	0	0	0	1	0	0	0	1	0	0	0	0
AT1G04400.1	337	G	E	Loss of activity.	NA	PubMed:9565033	CRY2	SWISSPROT	NA	0	1	NA	1	-7.978	35.36	10	0.976011118	0.967418631	2.77E-16	2.77E-16	-14.10393919	-14.11010806	42	0	NA	NA	1	1	1	1	1	1	1	1	1	1	1	1
AT1G04400.1	611	C	Y	NA	NA	NA	NA	ENSVATH04517976	0.45	0	0	0	NA	-0.651	NA	-7.95	0.018064249	0.030781175	10	10	-1.242307204	-1.151810267	3	0	1	1	NA	NA	0	0	NA	NA	0	0	0	0	0	0
AT1G04400.2	611	C	Y	NA	NA	NA	NA	ENSVATH04517976	0.45	0	0	0	NA	-0.651	NA	-7.95	0.01806424	0.030781162	10	10	-1.242304927	-1.151807803	3	0	1	1	NA	NA	0	0	NA	NA	0	0	0	0	0	0
AT1G04400.1	564	L	F	NA	NA	NA	NA	ENSVATH04517979	0.0125	0	NA	0.093	0.02	-2.27	2.26	-6.31	0.211395905	0.163905866	0.839235	0.840329	-0.168390625	-0.169959517	20	2	0	1	0	0	0	1	0	0	0	0	0	0	0	0
AT1G04400.2	564	L	F	NA	NA	NA	NA	ENSVATH04517979	0.0125	0	NA	0.093	0.02	-2.27	2.26	-6.31	0.211395459	0.163905566	0.83924	0.840334	-0.168382945	-0.169951809	20	2	0	1	0	0	0	1	0	0	0	0	0	0	0	0
AT1G04400.1	543	V	L	NA	NA	NA	NA	ENSVATH04517983	0.475	0	0	0.752	0	-0.167	3.63	-17.9	0.072296316	0.032748108	0.963243	0.964664	-0.033943256	-0.03541324	9	5	0	0	0	0	0	0	0	1	0	0	0	0	0	0
AT1G04400.2	543	V	L	NA	NA	NA	NA	ENSVATH04517983	0.475	0	0	0.752	0	-0.167	3.63	-17.9	0.072296146	0.032748041	0.963249	0.96467	-0.033936682	-0.035407114	9	5	0	0	0	0	0	0	0	1	0	0	0	0	0	0
AT1G04400.1	511	G	E	NA	NA	NA	NA	ENSVATH04517986	0.5	0	0	1	0	0.576	1.43	1.91	0.01310637	0.195033836	0.377022	0.324399	-2.435453472	-1.930990873	3	20	0	0	0	0	0	0	0	0	0	1	0	0	0	0
AT1G04400.2	511	G	E	NA	NA	NA	NA	ENSVATH04517986	0.5	0	0	1	0	0.576	1.43	1.92	0.013106529	0.195035487	0.37702	0.324398	-2.435507925	-1.93104645	3	20	0	0	0	0	0	0	0	0	0	1	0	0	0	0
AT1G04400.1	498	A	S	NA	NA	NA	NA	ENSVATH04517987	0.475	0	0	0.376	0.084	-0.39	3.62	5.28	0.26114175	0.081246474	0.358334	0.358921	-1.362683422	-1.366371996	29	8	0	0	0	1	0	0	0	1	0	1	0	0	0	0
AT1G04400.2	498	A	S	NA	NA	NA	NA	ENSVATH04517987	0.475	0	0	0.376	0.084	-0.39	3.62	5.28	0.261106246	0.081234863	0.358552	0.35914	-1.362034209	-1.365721281	29	8	0	0	0	1	0	0	0	1	0	1	0	0	0	0
AT1G04400.1	482	A	G	NA	NA	NA	NA	ENSVATH04517990	0.475	0	0	0.376	0.023	-1.774	3.42	2.28	0.200577631	0.18603908	0.225488	0.225583	-2.933316348	-2.937387936	6	0	0	0	0	0	0	1	0	1	0	1	0	0	0	0
AT1G04400.2	482	A	G	NA	NA	NA	NA	ENSVATH04517990	0.475	0	0	0.376	0.023	-1.774	3.42	2.28	0.200576566	0.186038306	0.225489	0.225584	-2.933290276	-2.937357858	6	0	0	0	0	0	0	1	0	1	0	1	0	0	0	0
AT1G04400.1	198	A	T	NA	NA	NA	NA	ENSVATH04518010	0.0125	0	NA	0.465	0	-0.1	2.93	-14.1	0.074014194	0.028976376	1.40359	1.40614	-0.469043828	-0.465984053	11	6	0	0	0	0	0	0	0	1	0	0	0	0	0	0
AT1G04400.2	198	A	T	NA	NA	NA	NA	ENSVATH04518010	0.0125	0	NA	0.465	0	-0.1	2.93	-14.1	0.074014218	0.028976376	1.40362	1.40618	-0.469074522	-0.466014532	11	6	0	0	0	0	0	0	0	1	0	0	0	0	0	0
AT1G04400.1	152	N	S	NA	NA	NA	NA	ENSVATH04518015	0.0125	0	NA	0.632	0	-1.585	3.25	3.64	0.141885047	0.070395672	0.564995	0.472521	-1.120095377	-0.758159773	16	5	0	0	0	0	0	1	0	1	0	1	0	0	0	0
AT1G04400.2	152	N	S	NA	NA	NA	NA	ENSVATH04518015	0.0125	0	NA	0.632	0	-1.585	3.25	3.64	0.141885651	0.070395991	0.564989	0.472516	-1.120117137	-0.758177193	16	5	0	0	0	0	0	1	0	1	0	1	0	0	0	0
AT1G04400.1	127	Q	H	NA	NA	NA	NA	ENSVATH04518016	0.0625	0	NA	0.217	0.124	-4.384	2.97	0.721	0.763772702	0.709061701	0.164548	0.164597	-5.413552232	-5.417988938	35	1	0	0	0	1	0	1	0	1	0	1	0	1	0	1
AT1G04400.2	127	Q	H	NA	NA	NA	NA	ENSVATH04518016	0.0625	0	NA	0.217	0.124	-4.384	2.97	0.725	0.763771079	0.709060021	0.164548	0.164597	-5.413509466	-5.417946869	35	1	0	0	0	1	0	1	0	1	0	1	0	1	0	1
AT1G04400.1	127	Q	P	NA	NA	NA	NA	ENSVATH04518017	0.0625	0	NA	0.07	0.993	-5.542	16.42	6.21	0.785336674	0.766009244	0.164548	0.164597	-5.413552232	-5.417988938	35	0	0	1	1	1	1	1	1	1	0	1	0	1	0	1
AT1G04400.2	127	Q	P	NA	NA	NA	NA	ENSVATH04518017	0.0625	0	NA	0.07	0.993	-5.542	16.42	6.21	0.785335157	0.766007784	0.164548	0.164597	-5.413509466	-5.417946869	35	0	0	1	1	1	1	1	1	1	0	1	0	1	0	1
AT1G04400.1	83	I	V	NA	NA	NA	NA	ENSVATH04518025	0.475	0	0	0.858	0	-0.543	4.61	-2.72	0.048547698	0.160112898	0.197392	0.166078	-4.21456552	-3.429593674	3	12	0	0	0	0	0	0	0	1	0	0	0	0	0	0
AT1G04400.2	83	I	V	NA	NA	NA	NA	ENSVATH04518025	0.475	0	0	0.858	0	-0.543	4.61	-2.72	0.048547377	0.160112022	0.197393	0.166079	-4.214532067	-3.429562144	3	12	0	0	0	0	0	0	0	1	0	0	0	0	0	0
AT1G04400.1	7	T	A	NA	NA	NA	NA	ENSVATH04518028	0.0125	0	NA	0.2	0.864	-3.984	9.09	10	0.930182067	0.914528877	0.0447282	0.0447367	-9.962270399	-9.96726402	39	0	0	0	0	1	0	1	0	1	1	1	1	1	1	1
AT1G04400.2	7	T	A	NA	NA	NA	NA	ENSVATH04518028	0.0125	0	NA	0.2	0.864	-3.984	9.09	10	0.930181786	0.914528521	0.0447283	0.0447367	-9.96224651	-9.967243882	39	0	0	0	0	1	0	1	0	1	1	1	1	1	1	1
AT1G04400.2	254	G	R	NA	fha-2	http://www.sciencemag.org/content/279/5355/1360.full	CRY2	MANUAL	NA	0	1	0.002	1	-7.686	36.52	10	0.975069534	0.966281403	5.61E-16	2.11E-16	-13.91755933	-13.92560783	42	0	1	1	1	1	1	1	1	1	1	1	1	1	1	1
AT1G04400.2	377	G	R	NA	NA	http://www.sciencedirect.com/science/article/pii/S1674205214606493	CRY2	MANUAL	NA	0	1	0	1	-7.984	36.52	10	0.975949684	0.96738211	5.61E-16	3.68E-17	-14.09785672	-14.09785672	42	0	1	1	1	1	1	1	1	1	1	1	1	1	1	1
AT1G04550.2	74	P	S	In bdl; gain of function. Affects auxin-related developmental processes.	bdl	http://www.sciencedirect.com/science/article/pii/S1360138501020428	IAA12	BOTH	NA	1	1	0	1	-7.749	17.5	10	0.981344594	0.973441486	1.61E-16	1.61E-16	-16	-16	40	0	1	1	1	1	1	1	1	1	1	1	1	1	1	1
AT1G04550.2	119	P	A	NA	NA	NA	NA	ENSVATH00005760	0.8	1	0	0.736	0	1.571	2.64	-14.7	0.043741234	0.056414281	6.63512	4.76523	-3.25834425	-4.8304343	2	4	0	0	0	0	0	0	0	0	0	0	0	0	0	0
AT1G04550.2	36	R	C	NA	NA	NA	NA	ENSVATH01012177	0.0125	1	NA	0.191	1	-1.03	2.2	-1.47	0.103083774	0.023091551	0.37461	0.375213	-1.524670281	-1.529957212	15	9	0	0	1	1	0	0	0	0	0	1	0	0	0	0
AT1G04550.2	6	E	G	NA	NA	NA	NA	ENSVATH04519063	0.1375	1	0	0.381	0.992	-0.247	4.17	2.03	0.294983608	0.294131686	0.521025	0.522178	-0.785368055	-0.790168763	20	0	0	0	0	1	0	0	0	1	0	1	0	0	0	1
AT1G04550.2	46	P	A	NA	NA	NA	NA	ENSVATH04519066	0.0125	1	NA	0.061	1	-7.033	7.55	8.19	0.880955985	0.854385748	0.0428659	0.0428744	-9.964934261	-9.972152768	31	0	0	1	1	1	1	1	0	1	1	1	0	1	0	1
AT1G04550.2	89	A	V	NA	NA	NA	NA	ENSVATH04519072	0.0125	1	NA	0.031	0.865	-1.212	NA	0.486	0.149380856	0.143796491	1.35E-14	1.35E-14	-0.351986587	-0.363823142	8	0	1	1	0	1	0	0	NA	NA	0	1	0	0	0	0
AT1G04550.2	147	S	F	NA	NA	NA	NA	ENSVATH04519073	0.0125	1	NA	0.018	1	-2.783	10.04	4.505	0.637772402	0.610108251	0.155837	0.1559	-5.084607553	-5.09052902	26	0	1	1	1	1	0	1	0	1	0	1	0	1	0	1
AT1G04550.2	205	F	C	NA	NA	NA	NA	ENSVATH04519074	0.0125	1	NA	0	1	-7.447	17.91	10	0.982646636	0.975317914	5.32E-17	6.50E-17	-16	-16	41	0	1	1	1	1	1	1	1	1	1	1	1	1	1	1
AT1G04860.1	240	C	A	Confers CAN sensitivity.	NA	PubMed:11115897	UBP2	SWISSPROT	NA	0	1	NA	1	-9	31.68	9.76	0.982646636	0.975317914	2.05E-17	2.05E-17	-16	-16	41	0	NA	NA	1	1	1	1	1	1	1	1	1	1	1	1
AT1G04860.1	454	A	V	NA	NA	NA	NA	ENSVATH00006260	0.1125	0	0	0.522	0.37	-0.506	1.89	-3.35	0.015993966	0.020651608	0.861792	0.865398	-0.115752521	-0.11962664	9	18	0	0	0	1	0	0	0	0	0	0	0	0	0	0
AT1G04860.1	429	V	A	NA	NA	NA	NA	ENSVATH00006261	0.95	0	NA	0.821	0	1.554	4.09	-7.61	0.026448502	0.091721849	0.783804	0.649987	-0.488113966	-0.23572521	2	10	0	0	0	0	0	0	0	1	0	0	0	0	0	0
AT1G04860.1	961	E	V	NA	NA	NA	NA	ENSVATH04520858	0.0125	0	NA	0.063	0	-0.681	NA	3.07	0.054121803	0.077645022	3.09213	0.772603	-0.081164762	-0.50478463	1	0	0	1	0	0	0	0	NA	NA	0	1	0	0	0	0
AT1G04860.1	958	F	V	NA	NA	NA	NA	ENSVATH04520859	0.0125	0	NA	0.738	0	-0.267	NA	-6.14	0.090147228	0.097523456	2.59704	2.77319	-0.556117704	-0.529000362	7	0	0	0	0	0	0	0	NA	NA	0	0	0	0	0	0
AT1G04860.1	827	T	I	NA	NA	NA	NA	ENSVATH04520863	0.0125	0	NA	0.088	0.002	-2.488	4.74	3.95	0.2702965	0.214364385	0.145595	0.145674	-4.562411139	-4.570625672	8	1	0	1	0	0	0	1	0	1	0	1	0	0	0	0
AT1G04860.1	803	R	W	NA	NA	NA	NA	ENSVATH04520864	0.025	0	NA	0.015	0.842	-2.518	4.06	-12.5	0.159894043	0.164968178	1.09054	1.09326	-0.067864772	-0.066116056	13	0	1	1	0	1	0	1	0	1	0	0	0	0	0	0
AT1G04860.1	784	D	V	NA	NA	NA	NA	ENSVATH04520865	0.025	0	NA	0.277	0.232	-3.023	2.86	-3.04	0.110837116	0.112786671	0.959852	0.965599	-0.024243856	-0.028610025	7	0	0	0	0	1	0	1	0	0	0	0	0	0	0	0
AT1G04860.1	673	E	K	NA	NA	NA	NA	ENSVATH04520868	0.0125	0	NA	0.172	0.655	-1.467	3.75	-4.63	0.14391183	0.15143419	1.83696	1.8482	-0.902267344	-0.892101812	11	0	0	0	0	1	0	1	0	1	0	0	0	0	0	0
AT1G04860.1	599	G	R	NA	NA	NA	NA	ENSVATH04520869	0.05	0	NA	0.524	0.992	-0.151	2.35	-4.47	0.131337365	0.084602261	0.866705	0.868671	-0.160293238	-0.163477775	14	3	0	0	0	1	0	0	0	0	0	0	0	0	0	0
AT1G04860.1	550	M	T	NA	NA	NA	NA	ENSVATH04520870	0.0125	0	NA	0.779	0.003	-1.19	NA	0.44	0.090751027	0.097270679	2.367	2.55767	-0.375859253	-0.342169995	7	0	0	0	0	0	0	0	NA	NA	0	1	0	0	0	0
AT1G04860.1	536	S	P	NA	NA	NA	NA	ENSVATH04520871	0.025	0	NA	0.332	0.984	-0.958	NA	0.271	0.11925883	0.114514005	4.43E-16	3.39E-15	-0.164293579	-0.181611112	5	0	0	0	0	1	0	0	NA	NA	0	1	0	0	0	0
AT1G04860.1	514	N	Y	NA	NA	NA	NA	ENSVATH04520873	0.0125	0	NA	0.039	0	-1.404	2.39	-13.8	0.080257972	0.064735267	3.86804	3.91946	-3.379378889	-3.345712732	4	2	0	1	0	0	0	1	0	0	0	0	0	0	0	0
AT1G04860.1	475	A	D	NA	NA	NA	NA	ENSVATH04520874	0.0125	0	NA	0.592	0.048	-1.299	10.3	-3.91	0.153694698	0.137578842	1.17661	1.18106	-0.16694218	-0.162858711	14	1	0	0	0	1	0	1	0	1	0	0	0	0	0	0
AT1G04860.1	435	S	Y	NA	NA	NA	NA	ENSVATH04520877	0.0375	0	NA	0.31	0.993	-2.149	3.27	-8.975	0.165259907	0.178428291	2.68347	2.70212	-1.798073305	-1.781700874	13	0	0	0	1	1	0	1	0	1	0	0	0	0	0	0
AT1G04860.1	338	R	C	NA	NA	NA	NA	ENSVATH04520879	0.0375	0	NA	0.136	0.17	-1.75	3.01	-6.91	0.142812135	0.154984722	3.30601	3.33426	-2.974739205	-2.95133295	9	0	0	1	0	1	0	1	0	1	0	0	0	0	0	0
AT1G04860.1	257	D	N	NA	NA	NA	NA	ENSVATH04520881	0.025	0	NA	0.262	0.03	-3.237	1.58	0.898	0.204900377	0.157410947	0.768428	0.771059	-0.257267801	-0.262073813	19	2	0	0	0	0	0	1	0	0	0	1	0	0	0	0
AT1G04860.1	214	L	I	NA	NA	NA	NA	ENSVATH04520882	0.025	0	NA	0.453	0.521	-0.393	3.11	2.18	0.233472741	0.220230167	0.248533	0.248752	-2.482752623	-2.488214199	10	0	0	0	0	1	0	0	0	1	0	1	0	0	0	0
AT1G04860.1	124	V	A	NA	NA	NA	NA	ENSVATH04520885	0.025	0	NA	0.397	0.606	-3.362	3.93	4.13	0.229837495	0.039256003	0.148582	0.148676	-4.16578791	-4.173393998	23	11	0	0	0	1	0	1	0	1	0	1	0	0	0	0
AT1G04860.1	106	N	K	NA	NA	NA	NA	ENSVATH04520886	0.025	0	NA	0.482	0.001	0.34	5.4	-15	0.101475957	0.107876041	0.381995	0.305838	-1.625665989	-1.078217834	1	0	0	0	0	0	0	0	0	1	0	0	0	0	0	0
AT1G04860.1	70	R	Q	NA	NA	NA	NA	ENSVATH04520889	0.0125	0	NA	0.607	0.005	0.344	1.99	-1.29	0.124077593	0.125195418	0.815938	0.81951	-0.139532024	-0.143520644	8	0	0	0	0	0	0	0	0	0	0	1	0	0	0	0
AT1G05180.1	154	C	Y	In axr1-3; auxin-resistant.	axr1-3	PubMed:8321287	AXR1	SWISSPROT	NA	1	1	0.022	1	-7.634	21.23	10	0.970196858	0.960531566	2.05E-17	2.05E-17	-13.05922212	-13.06759118	42	0	1	1	1	1	1	1	1	1	1	1	1	1	1	1
AT1G05180.1	409	N	S	NA	NA	NA	NA	ENSVATH01014413	0.1875	1	0	1	0.001	0.632	2.13	3.98	0.029544495	0.004226754	0.401915	0.402338	-2.160516925	-2.166562818	17	22	0	0	0	0	0	0	0	0	0	1	0	0	0	0
AT1G05180.1	302	V	L	NA	NA	NA	NA	ENSVATH01014414	0.025	1	NA	1	0	-0.743	3.33	-2.2	0.369267138	0.243006589	0.499496	0.431985	-1.595891853	-1.206341599	30	4	0	0	0	0	0	0	0	1	0	1	0	1	0	0
AT1G05180.1	537	L	F	NA	NA	NA	NA	ENSVATH04522749	0.0125	1	NA	0.142	0.96	-1.758	7.21	-0.756	0.753984207	0.726191033	0.0400677	0.0400897	-6.187203585	-6.192703832	30	0	0	1	0	1	0	1	0	1	0	1	0	1	0	1
AT1G05180.1	465	T	N	NA	NA	NA	NA	ENSVATH04522750	0.0125	1	NA	0.296	0.174	-2.547	11.37	2.04	0.477766082	0.465797207	0.358865	0.359176	-2.563819854	-2.569400945	25	0	0	0	0	1	0	1	1	1	0	1	0	1	0	1
AT1G05180.1	405	D	N	NA	NA	NA	NA	ENSVATH04522759	0.0125	1	NA	0.146	0.961	-3.108	2.64	8.66	0.668971964	0.641250841	0.184235	0.184364	-5.410170991	-5.417752499	27	0	0	1	0	1	0	1	0	0	1	1	0	1	0	1
AT1G05180.1	147	M	L	NA	NA	NA	NA	ENSVATH04522768	0.0125	1	NA	1	0	0.08	1.55	4.4	0.439751041	0.091162897	0.129325	0.129419	-7.288211323	-7.298138554	27	11	0	0	0	0	0	0	0	0	0	1	0	1	0	0
AT1G05180.1	132	S	P	NA	NA	NA	NA	ENSVATH04522773	0.05	1	NA	0.254	0.956	-2.951	19.02	7.815	0.840479256	0.821627777	0.116872	0.11696	-6.380798109	-6.388528422	37	0	0	0	0	1	0	1	1	1	0	1	0	1	0	1
AT1G05180.1	109	D	V	NA	NA	NA	NA	ENSVATH04522774	0.0125	1	NA	0.045	0.979	-5.785	15.27	8.44	0.866298707	0.849574338	0.131153	0.131242	-6.672504157	-6.680290306	39	0	0	1	0	1	1	1	1	1	1	1	0	1	0	1
AT1G05180.1	42	A	T	NA	NA	NA	NA	ENSVATH04522778	0.0125	1	NA	0.16	0.992	-3.509	21.53	8.43	0.878014847	0.857219336	0.0323211	0.0323396	-8.102628608	-8.110120365	36	0	0	0	0	1	0	1	1	1	1	1	0	1	0	1
AT1G05460.1	888	W	F	Loss of binding to AGO1 and AGO4.	NA	PubMed:22940249	SDE3	SWISSPROT	NA	0	1	NA	0.958	-2.572	NA	-0.617	0.136442129	0.13220783	0.248252	0.252841	-0.428774634	-0.452781745	7	0	NA	NA	0	1	0	1	NA	NA	0	1	0	0	0	0
AT1G05460.1	427	K	A	Loss of helicase activity.	NA	PubMed:22940249	SDE3	SWISSPROT	NA	0	1	NA	1	-5.943	23.32	9.46	0.982618767	0.975289991	0.00794164	0.00794589	-16	-16	41	0	NA	NA	1	1	1	1	1	1	1	1	1	1	1	1
AT1G05460.1	824	P	A	NA	NA	NA	NA	ENSVATH00007286	0.05	0	NA	0.019	1	-7.151	10.9	7.31	0.965904516	0.954244337	0.0230473	0.0230616	-13.45093417	-13.47328992	39	0	1	1	1	1	1	1	0	1	0	1	1	1	1	1
AT1G05460.1	855	G	E	NA	NA	NA	NA	ENSVATH01015760	0.15	0	0	0.074	0.567	0.576	5.93	-4.19	0.13921921	0.107048801	1.23607	1.24352	-0.264077097	-0.255959059	14	2	0	1	0	1	0	0	0	1	0	0	0	0	0	0
AT1G05460.1	855	G	R	NA	NA	NA	NA	ENSVATH01015761	0.15	0	0	0.044	0.727	-0.808	6.83	-13	0.154697328	0.138695667	1.23607	1.24352	-0.264077097	-0.255959059	14	1	0	1	0	1	0	0	0	1	0	0	0	0	0	0
AT1G05460.1	965	C	S	NA	NA	NA	NA	ENSVATH04524352	0.0375	0	NA	0.598	0	-0.193	NA	-2.37	0.063889204	0.049253265	2.11736	2.2219	-0.556657204	-0.513930993	4	2	0	0	0	0	0	0	NA	NA	0	0	0	0	0	0
AT1G05460.1	960	E	A	NA	NA	NA	NA	ENSVATH04524353	0.0125	0	NA	0	0.066	-0.35	NA	1.38	0.090772762	0.094313611	1.53855	1.6187	-0.26692156	-0.235860496	5	0	1	1	0	1	0	0	NA	NA	0	1	0	0	0	0
AT1G05460.1	931	W	C	NA	NA	NA	NA	ENSVATH04524355	0.0375	0	NA	0.084	0	-1.314	NA	2.36	0.119095362	0.11506847	0.246008	0.251469	-0.385657602	-0.410823662	5	0	0	1	0	0	0	1	NA	NA	0	1	0	0	0	0
AT1G05460.1	876	G	C	NA	NA	NA	NA	ENSVATH04524358	0.0125	0	NA	0.099	0.821	-0.286	NA	-0.617	0.087451011	0.090625429	1.69581	1.8799	-0.236217976	-0.195703105	5	0	0	1	0	1	0	0	NA	NA	0	1	0	0	0	0
AT1G05460.1	870	D	H	NA	NA	NA	NA	ENSVATH04524359	0.0125	0	NA	0.022	1	-2.536	18.75	7.28	0.943096753	0.922213932	0.0189425	0.018954	-14.03603141	-14.06304816	30	0	1	1	1	1	0	1	1	1	0	1	1	1	1	1
AT1G05460.1	861	G	S	NA	NA	NA	NA	ENSVATH04524360	0.0375	0	NA	0.81	0.212	0.467	1.91	2.29	0.114073391	0.041032015	0.306279	0.307265	-2.309655045	-2.329067058	9	6	0	0	0	1	0	0	0	0	0	1	0	0	0	0
AT1G05460.1	860	G	S	NA	NA	NA	NA	ENSVATH04524361	0.0125	0	NA	0.739	0.008	0.943	4.61	2.6	0.13515469	0.091912213	0.212903	0.213605	-2.535505982	-2.556152087	4	2	0	0	0	0	0	0	0	1	0	1	0	0	0	0
AT1G05460.1	543	L	F	NA	NA	NA	NA	ENSVATH04524365	0.0375	0	NA	1	0	4.394	2.09	3.43	0.015684139	0.676142992	0.0660261	0.0542266	-11.11072239	-9.882171772	5	34	0	0	0	0	0	0	0	0	0	1	0	0	0	1
AT1G05460.1	393	I	V	NA	NA	NA	NA	ENSVATH04524376	0.0375	0	NA	0.26	0.784	-0.786	1.92	0.14	0.471882755	0.401011515	0.165267	0.165478	-4.5522824	-4.572825604	20	1	0	0	0	1	0	0	0	0	0	1	0	1	0	1
AT1G05460.1	392	P	L	NA	NA	NA	NA	ENSVATH04524377	0.025	0	NA	0.248	1	-9.489	13.24	7.75	0.96126668	0.948852488	0.0413944	0.0414183	-12.85013762	-12.87219894	39	0	0	0	1	1	1	1	1	1	0	1	1	1	1	1
AT1G05460.1	338	R	H	NA	NA	NA	NA	ENSVATH04524379	0.0375	0	NA	0.256	0.001	1.071	1.84	-16.65	0.076738709	0.041994464	1.61558	1.6359	-0.750090227	-0.730505736	8	4	0	0	0	0	0	0	0	0	0	0	0	0	0	0
AT1G05460.1	333	S	P	NA	NA	NA	NA	ENSVATH04524380	0.0375	0	NA	0.334	0	0.742	2.92	-13.985	0.03340721	0.028621548	2.51397	2.52538	-1.655067651	-1.646724437	6	10	0	0	0	0	0	0	0	1	0	0	0	0	0	0
AT1G05460.1	324	A	V	NA	NA	NA	NA	ENSVATH04524381	0.0125	0	NA	0.177	1	-3.973	11.42	6.55	0.953220521	0.939662111	0.0516312	0.0516666	-11.93893977	-11.96036383	39	0	0	0	1	1	0	1	1	1	0	1	1	1	1	1
AT1G05460.1	235	D	N	NA	NA	NA	NA	ENSVATH04524391	0.0125	0	NA	0.475	0.337	-0.211	2.22	5.29	0.111952809	0.111728571	0.741883	0.753515	-0.200921485	-0.216197863	6	0	0	0	0	1	0	0	0	0	0	1	0	0	0	0
AT1G05460.1	141	D	G	NA	NA	NA	NA	ENSVATH04524393	0.0125	0	NA	0.355	0.021	-3.816	3.61	4.21	0.556425419	0.384107583	0.116817	0.116956	-7.2424567	-7.267606239	20	3	0	0	0	0	0	1	0	1	0	1	0	1	0	1
AT1G05460.1	138	K	M	NA	NA	NA	NA	ENSVATH04524395	0.0875	0	NA	0.127	0.987	-5.418	4.14	-1.71	0.697494927	0.446621388	0.0988738	0.0989689	-8.127847219	-8.151615027	29	5	0	1	0	1	1	1	0	1	0	1	0	1	0	1
AT1G05460.1	86	Y	F	NA	NA	NA	NA	ENSVATH04524400	0.0125	0	NA	1	0.036	-1.204	1.51	-5.16	0.204735245	0.009496321	0.102215	0.10229	-8.154901954	-8.170747052	21	18	0	0	0	0	0	0	0	0	0	0	0	0	0	0
AT1G05470.1	575	G	D	In cvp2-1; induces an open vein network.	cvp2-1	PubMed:15100402	IP5P6	SWISSPROT	NA	1	1	0.03	NA	-2.275	39.31	7	0.764614796	0.719512867	0.101231	0.101357	-8.428869048	-8.590056721	24	0	1	1	NA	NA	0	1	1	1	0	1	0	1	0	1
AT1G05470.1	543	A	V	In cvp2-2; induces an open vein network.	cvp2-2	PubMed:15100402	IP5P6	SWISSPROT	NA	1	1	0.003	NA	-3.817	22.41	7.93	0.963478448	0.95174544	0.0314841	0.0314883	-12.76935952	-12.80386252	40	0	1	1	NA	NA	0	1	1	1	0	1	1	1	1	1
AT1G05470.1	603	E	D	NA	NA	NA	NA	ENSVATH04524501	0.0125	1	NA	0.124	NA	-2.621	2.97	-11.4	0.947617617	0.903466611	0.0554164	0.0555171	-12.7620493	-12.90735303	38	2	0	1	NA	NA	0	1	0	1	0	0	1	1	1	1
AT1G05470.1	381	C	S	NA	NA	NA	NA	ENSVATH04524509	0.0125	1	NA	0.315	NA	-9.95	2.9	8.24	0.978881128	0.964575777	0.0144857	0.014486	-16	-16	40	1	0	0	NA	NA	1	1	0	1	1	1	1	1	1	1
AT1G05470.1	272	Y	F	NA	NA	NA	NA	ENSVATH04524512	0.0125	1	NA	1	NA	-0.441	NA	1.01	0.384984873	0.288027597	2.30E-16	4.73E-17	-4.179520707	-5.616985766	10	0	0	0	NA	NA	0	0	NA	NA	0	1	0	1	0	0
AT1G05470.1	67	S	N	NA	NA	NA	NA	ENSVATH04524519	0.0125	1	NA	0.514	0.462	-1.06	2.58	0.422	0.56173827	0.397527894	0.156994	0.157212	-5.989526191	-6.029256674	24	3	0	0	0	1	0	0	0	0	0	1	0	1	0	1
AT1G05470.1	17	M	I	NA	NA	NA	NA	ENSVATH04524525	0.025	1	NA	0.153	0.014	-1.121	5.37	1.83	0.791333644	0.714211688	0.0645134	0.0645368	-9.813337153	-9.856279342	24	1	0	1	0	0	0	0	0	1	0	1	0	1	0	1
AT1G05580.1	761	P	K	Disturbs overall chloroplast structure.	NA	PubMed:15220473	CHX23	SWISSPROT	NA	1	1	NA	0.998	-7.2	6.64	7.755	0.973935381	0.957053167	0.0419133	0.0419261	-15.36344491	-15.36344491	39	1	NA	NA	1	1	1	1	0	1	0	1	1	1	1	1
AT1G05580.1	819	A	T	NA	NA	NA	NA	ENSVATH00007465	0.5875	1	0	0.238	0.014	0.202	NA	-2.51	0.080984413	0.074589328	2.39931	2.55461	-0.398548447	-0.36864249	7	1	0	0	0	0	0	0	NA	NA	0	0	0	0	0	0
AT1G05580.1	362	F	V	NA	NA	NA	NA	ENSVATH00007470	0.25	1	0	0.494	0	0.369	2.51	-1.06	0.078064573	0.049385329	1.03948	1.04652	-0.035705005	-0.030252901	7	3	0	0	0	0	0	0	0	0	0	1	0	0	0	0
AT1G05580.1	274	V	M	NA	NA	NA	NA	ENSVATH00007472	0.5625	1	0	0.206	0.046	-0.438	4.01	6.64	0.511934741	0.45528225	0.107714	0.107755	-8.468332066	-8.478157401	9	0	0	0	0	1	0	0	0	1	0	1	0	1	0	1
AT1G05580.1	721	V	I	NA	NA	NA	NA	ENSVATH01016227	0.075	1	NA	1	0.177	0.171	1.61	-3.89	0.099414665	0.003087794	0.166496	0.166583	-5.764272126	-5.77358313	20	20	0	0	0	1	0	0	0	0	0	0	0	0	0	0
AT1G05580.1	811	A	T	NA	NA	NA	NA	ENSVATH04525246	0.0125	1	NA	0.199	0.709	0.102	2.77	-3.8	0.198418843	0.187247466	0.275319	0.275621	-2.223534183	-2.233229602	8	0	0	0	0	1	0	0	0	0	0	0	0	0	0	0
AT1G05580.1	618	A	T	NA	NA	NA	NA	ENSVATH04525247	0.0125	1	NA	0.107	0.998	-3.083	14.56	3.8	0.912184678	0.888093542	0.0686691	0.0686934	-11.57088429	-11.58221287	31	0	0	1	1	1	0	1	1	1	0	1	1	1	0	1
AT1G05580.1	529	A	T	NA	NA	NA	NA	ENSVATH04525249	0.025	1	NA	0.637	0.001	-0.464	3.4	-17.7	0.094916618	0.072657911	1.53465	1.56789	-0.253596241	-0.239766053	9	2	0	0	0	0	0	0	0	1	0	0	0	0	0	0
AT1G05580.1	430	I	M	NA	NA	NA	NA	ENSVATH04525251	0.025	1	NA	0.036	0.031	-1.391	6.07	-4.38	0.348710253	0.288648785	0.204581	0.204747	-3.927349457	-3.938596533	15	1	1	1	0	0	0	1	0	1	0	0	0	1	0	1
AT1G05580.1	370	S	A	NA	NA	NA	NA	ENSVATH04525257	0.0125	1	NA	0.895	0.001	0.694	3.7	1.51	0.429375593	0.338683036	0.122981	0.12304	-7.852187687	-7.8621492	8	1	0	0	0	0	0	0	0	1	0	1	0	1	0	1
AT1G05580.1	38	Q	L	NA	NA	NA	NA	ENSVATH04525265	0.025	1	NA	0.403	0.001	-0.611	4.26	2.2	0.41918049	0.372768512	0.158189	0.158277	-7.110926432	-7.123194065	8	0	0	0	0	0	0	0	0	1	0	1	0	1	0	1
AT1G05760.1	139	D	N	In rtm1-1; susceptible to systemic infection by tobacco etch virus (TEV).	rtm1-1	PubMed:10618445	RTM1	SWISSPROT	NA	1	1	1	0.069	0.285	1.91	-8.91	0.119317987	0.103151275	0.846274	0.858592	-0.176397979	-0.197723775	9	1	0	0	0	1	0	0	0	0	0	0	0	0	0	0
AT1G05760.1	56	S	F	In rtm1-2; susceptible to systemic infection by tobacco etch virus (TEV).	rtm1-2	PubMed:10618445	RTM1	SWISSPROT	NA	1	1	0	1	-5.317	6.7	5.305	0.77111123	0.739848868	0.105139	0.105288	-6.998751029	-7.042042832	29	0	1	1	1	1	1	1	0	1	0	1	0	1	0	1
AT1G05760.1	132	G	D	In rtm1-5; susceptible to systemic infection by tobacco etch virus (TEV).	rtm1-5	PubMed:10618445	RTM1	SWISSPROT	NA	1	1	0.269	0.443	-5.606	31.85	3.53	0.5666136	0.512237286	0.106633	0.106803	-8.086888466	-8.129288914	13	0	0	0	0	1	1	1	1	1	0	1	0	1	0	1
AT1G05760.1	93	N	I	NA	NA	NA	NA	ENSVATH00007737	0.125	1	0	0.141	0.083	-3.074	6.21	1.57	0.221176842	0.205258686	0.272253	0.273668	-2.822117357	-2.87255503	8	0	0	1	0	1	0	1	0	1	0	1	0	0	0	0
AT1G05760.1	62	F	C	NA	NA	NA	NA	ENSVATH01016796	0.125	1	0	0.205	0.004	-1.248	3.22	-19.9	0.103382238	0.103202884	0.80399	0.820024	-0.179776202	-0.203096255	5	0	0	0	0	0	0	0	0	1	0	0	0	0	0	0
AT1G05760.1	116	S	P	NA	NA	NA	NA	ENSVATH04526143	0.0125	1	NA	0.279	0.033	-0.872	5.97	2.21	0.40307148	0.312559302	0.140542	0.140692	-8.030554727	-8.061667437	6	1	0	0	0	0	0	0	0	1	0	1	0	1	0	1
AT1G05760.1	98	S	Y	NA	NA	NA	NA	ENSVATH04526144	0.0125	1	NA	0.005	1	-4.844	20.66	9.33	0.979910287	0.97138991	0.00904107	0.00905009	-16	-16	39	0	1	1	1	1	1	1	1	1	1	1	1	1	1	1
AT1G05850.1	168	S	I	In arm; abnormal root architecture in responses to high nitrate.	arm	PubMed:20007445	CTL1	SWISSPROT	NA	1	1	0.019	0.01	-1.683	3.66	4.12	0.274311311	0.22585802	0.299362	0.301355	-3.05860635	-3.091003244	13	1	1	1	0	0	0	1	0	1	0	1	0	0	0	0
AT1G05850.1	188	G	R	In hot2-1; reduced tolerance to abiotic stresses such as salt, drought and heat.	hot2-1	PubMed:17156413	CTL1	SWISSPROT	NA	1	1	0.03	1	-7.631	36.52	10	0.977886061	0.969243535	1.61E-16	7.84E-19	-14.81155246	-14.8439751	41	0	1	1	1	1	1	1	1	1	1	1	1	1	1	1
AT1G05850.1	224	I	T	NA	NA	NA	NA	ENSVATH04526834	0.0375	1	NA	0.657	0.26	-2.429	5.38	7.93	0.49283472	0.475305782	0.301982	0.302891	-3.116126295	-3.141199418	24	0	0	0	0	1	0	1	0	1	0	1	0	1	0	1
AT1G06040.1	115	I	M	NA	NA	NA	NA	ENSVATH01017581	0.1	1	NA	0.255	0.002	-0.103	3.74	-9.21	0.06202575	0.064579074	2.00148	1.78662	-0.971457213	-1.288150609	1	2	0	0	0	0	0	0	0	1	0	0	0	0	0	0
AT1G06040.1	225	H	Y	NA	NA	NA	NA	ENSVATH04527751	0.0125	1	NA	1	0	-1.001	2.57	-18.7	0.015310766	0.098333799	0.5834	0.505349	-1.116211418	-0.789162671	4	17	0	0	0	0	0	0	0	0	0	0	0	0	0	0
AT1G06040.1	219	M	L	NA	NA	NA	NA	ENSVATH04527752	0.0125	1	NA	0.303	0.315	-0.599	5.04	-14.4	0.141647476	0.141282246	0.696801	0.701533	-0.386564132	-0.398416909	9	0	0	0	0	1	0	0	0	1	0	0	0	0	0	0
AT1G06040.1	116	E	D	NA	NA	NA	NA	ENSVATH04527759	0.0125	1	NA	0.564	0.001	-0.785	1.44	-12.6	0.102332097	0.019721731	0.476269	0.477889	-1.121695406	-1.133925429	18	10	0	0	0	0	0	0	0	0	0	0	0	0	0	0
AT1G06040.1	226	K	N	Prevents nuclear import.	NA	PubMed:21685177	BBX24	SWISSPROT	NA	1	1	0.166	0.992	-4.313	3.48	4.2	0.968036953	0.956421345	0.0429358	0.0429575	-14.12915909	-14.14908372	38	0	0	0	0	1	0	1	0	1	0	1	1	1	1	1
AT1G06400.1	126	N	I	Decreases GTP-binding.	NA	PubMed:8013629	RABA1A	SWISSPROT	NA	1	1	0	1	-8.497	22.05	10	0.983859296	0.977064892	5.32E-17	5.32E-17	-16	-16	42	0	1	1	1	1	1	1	1	1	1	1	1	1	1	1
AT1G06400.1	72	Q	L	Loss of GTPase activity.	NA	PubMed:8013629	RABA1A	SWISSPROT	NA	1	1	0.047	0.994	-6.529	19.88	10	0.983859296	0.977064892	2.05E-17	4.36E-17	-16	-16	42	0	0	1	1	1	1	1	1	1	1	1	1	1	1	1
AT1G08090.1	119	G	R	In lin1; reduced nitrate uptake and increased lateral root initiation.	lin1	PubMed:16157886	NRT2.1	SWISSPROT	NA	1	1	0	1	-6.778	36.52	10	0.983859296	0.977064892	4.36E-17	3.68E-17	-16	-16	42	0	1	1	1	1	1	1	1	1	1	1	1	1	1	1
AT1G08090.1	38	K	N	NA	NA	NA	NA	ENSVATH04537749	0.0375	1	NA	0.093	0.003	-2.658	2.46	-15.9	0.770973089	0.489171988	0.130473	0.130616	-9.810245597	-9.839894483	31	6	0	1	0	0	0	1	0	0	0	0	0	1	0	1
AT1G08090.1	372	A	T	NA	NA	NA	NA	ENSVATH04537756	0.0125	1	NA	0.218	0.974	-2.724	13.29	7.57	0.96425208	0.952752283	0.0392939	0.039324	-12.89166842	-12.91521645	40	0	0	0	0	1	0	1	1	1	0	1	1	1	1	1
AT1G08260.1	992	G	R	In esd7-1; early flowering independently of photoperiod, shortened inflorescence internodes and altered flowers, leaves and roots development. Enrichement in acetylated H3 and trimethylated H3 'Lys-4' (H3K4me3) activating epigenetic marks of the chromatin of FT and AG loci.	esd7-1	http://onlinelibrary.wiley.com/doi/10.1111/j.1365-313X.2009.04093.x/full	TIL1	BOTH	NA	1	1	0.004	1	-7.236	36.52	9.75	0.96189676	0.94912438	2.30E-16	2.30E-16	-13.24286599	-13.25657569	38	0	1	1	1	1	1	1	1	1	1	1	1	1	1	1
AT1G08260.1	469	G	R	In til1-4; lengthening of the cell cycle during embryo development and alters cell type patterning of the hypophyseal lineage in the root, leading to a displacement of the root pole from its normal position on top of the suspensor. Slow growing roots, slightly delayed flowering, altered floral phyllotaxis, a reduced number of ovules, abnormally developing ovules, and reduced fertility.	til1-4	http://www.plantcell.org/content/17/12/3362.full	TIL1	BOTH	NA	1	1	0	1	-7.328	36.52	9.48	0.976212016	0.966781626	2.77E-16	2.30E-16	-15.18368445	-15.18368445	39	0	1	1	1	1	1	1	1	1	1	1	1	1	1	1
AT1G08260.1	2097	V	L	NA	NA	NA	NA	ENSVATH00011546	0.0625	1	NA	1	0	2.411	0.9	2.34	0.004434799	0.561247267	0.187672	0.121435	-3.969626996	-3.107730045	1	30	0	0	0	0	0	0	0	0	0	1	0	0	0	1
AT1G08260.1	630	R	S	NA	NA	NA	NA	ENSVATH01024410	0.0125	1	NA	0.02	0.001	-5.145	2.83	6.11	0.868977518	0.790779189	0.0537059	0.0537325	-9.578142644	-9.592394806	34	2	1	1	0	0	1	1	0	0	0	1	0	1	0	1
AT1G08260.1	1759	I	M	NA	NA	NA	NA	ENSVATH01024425	0.15	1	0	0.393	0.009	-1.548	7.49	-12	0.234397248	0.215537378	0.205981	0.206435	-3.490583744	-3.504723537	7	0	0	0	0	0	0	1	0	1	0	0	0	0	0	0
AT1G08260.1	37	L	I	NA	NA	NA	NA	ENSVATH04538497	0.0125	1	NA	0.298	0.006	-0.84	1.29	5.1	0.575885228	0.548658697	0.131714	0.131824	-4.529801268	-4.541619027	24	0	0	0	0	0	0	0	0	0	0	1	0	1	0	1
AT1G08260.1	121	E	G	NA	NA	NA	NA	ENSVATH04538506	0.0125	1	NA	0.156	0.006	-4.55	7.23	7.61	0.462994364	0.413176525	0.268788	0.269465	-1.736960757	-1.749955898	28	1	0	1	0	0	1	1	0	1	0	1	0	1	0	1
AT1G08260.1	195	L	F	NA	NA	NA	NA	ENSVATH04538515	0.0125	1	NA	0.027	0.858	-2.934	4.72	1.44	0.652217598	0.629522785	0.109361	0.109438	-4.296907325	-4.307510001	29	0	1	1	0	1	0	1	0	1	0	1	0	1	0	1
AT1G08260.1	202	Y	F	NA	NA	NA	NA	ENSVATH04538516	0.0125	1	NA	0.002	1	-3.324	8.95	7.89	0.905865644	0.884970242	0.0340732	0.0340912	-9.801408612	-9.813874362	35	0	1	1	1	1	0	1	0	1	0	1	1	1	0	1
AT1G08260.1	493	N	K	NA	NA	NA	NA	ENSVATH04538539	0.0125	1	NA	0.284	0.007	-2.457	5.77	3.63	0.631593785	0.560907002	0.0459077	0.0459296	-11.04393391	-11.06005814	8	0	0	0	0	0	0	1	0	1	0	1	0	1	0	1
AT1G08260.1	565	I	V	NA	NA	NA	NA	ENSVATH04538543	0.0625	1	NA	1	0	0.395	1.81	3.86	0.015468749	0.154797053	0.0815764	0.0816293	-6.129154416	-6.143039829	9	30	0	0	0	0	0	0	0	0	0	1	0	0	0	0
AT1G08260.1	885	V	L	NA	NA	NA	NA	ENSVATH04538558	0.0125	1	NA	0.071	0.005	-1.098	3.39	-1.28	0.181028355	0.188810324	1.39306	1.40267	-0.376198886	-0.367546757	15	0	0	1	0	0	0	0	0	1	0	1	0	0	0	0
AT1G08260.1	1222	I	T	NA	NA	NA	NA	ENSVATH04538575	0.0125	1	NA	0.64	0.01	-0.425	2.57	-3.67	0.094948646	0.080220745	4.20638	4.44027	-1.832933861	-1.776600118	12	2	0	0	0	0	0	0	0	0	0	0	0	0	0	0
AT1G08260.1	1279	G	E	NA	NA	NA	NA	ENSVATH04538577	0.0125	1	NA	1	0.153	-0.578	5.29	-7.8	0.109680134	0.114220733	1.81509	1.82574	-1.153207798	-1.140064726	6	0	0	0	0	1	0	0	0	1	0	0	0	0	0	0
AT1G08260.1	1327	S	L	NA	NA	NA	NA	ENSVATH04538579	0.05	1	NA	0.282	0.001	-2.514	6.73	0.671	0.090333096	0.081369096	0.74196	0.640173	-0.611957443	-0.367225961	4	1	0	0	0	0	0	1	0	1	0	1	0	0	0	0
AT1G08260.1	1389	E	V	NA	NA	NA	NA	ENSVATH04538582	0.0125	1	NA	0.114	0.891	-6.15	31.34	6.48	0.888012121	0.864898981	2.77E-16	2.77E-16	-9.205012349	-9.220597542	34	0	0	1	0	1	1	1	1	1	0	1	0	1	0	1
AT1G08260.1	1420	N	S	NA	NA	NA	NA	ENSVATH04538585	0.0125	1	NA	0.838	0.017	-1.758	2.98	1.78	0.255311357	0.074694787	0.240737	0.241309	-3.163439176	-3.177614174	23	8	0	0	0	0	0	1	0	1	0	1	0	0	0	0
AT1G08260.1	1463	L	F	NA	NA	NA	NA	ENSVATH04538592	0.0125	1	NA	0.045	0.24	-1.683	2.63	-5.48	0.093160332	0.06145074	2.3623	2.37778	-1.876060203	-1.861129143	8	3	0	1	0	1	0	1	0	0	0	0	0	0	0	0
AT1G08260.1	1480	N	S	NA	NA	NA	NA	ENSVATH04538593	0.0125	1	NA	0.571	0	-0.505	3.69	4.73	0.082702064	0.106861077	0.352041	0.264097	-2.297987587	-1.729360753	1	3	0	0	0	0	0	0	0	1	0	1	0	0	0	0
AT1G08260.1	1507	W	S	NA	NA	NA	NA	ENSVATH04538594	0.0125	1	NA	0.4	0.001	-1.371	2.67	-4.6	0.098599944	0.087262904	1.34966	1.35733	-0.377723791	-0.370176693	7	1	0	0	0	0	0	1	0	0	0	0	0	0	0	0
AT1G08260.1	1513	Q	L	NA	NA	NA	NA	ENSVATH04538595	0.0125	1	NA	0.211	0.001	-3.472	8.63	7.065	0.273644235	0.221943294	0.180206	0.180478	-3.637583504	-3.649643422	11	1	0	0	0	0	0	1	0	1	0	1	0	0	0	0
AT1G08260.1	1562	D	E	NA	NA	NA	NA	ENSVATH04538601	0.0625	1	NA	1	0.003	-1.949	3.04	-3.36	0.348531011	0.206297696	0.339441	0.34049	-1.996763567	-2.008801401	26	4	0	0	0	0	0	1	0	1	0	0	0	1	0	0
AT1G08260.1	1803	L	F	NA	NA	NA	NA	ENSVATH04538617	0.0125	1	NA	1	0.018	0.752	2.86	5.14	0.032658198	0.011142631	0.334825	0.33536	-2.222555052	-2.230239512	13	19	0	0	0	0	0	0	0	0	0	1	0	0	0	0
AT1G08260.1	1878	I	T	NA	NA	NA	NA	ENSVATH04538620	0.0125	1	NA	0.574	0.001	0.84	2.36	-14	0.078789872	0.091379486	4.5015	4.72906	-2.072479765	-2.016700797	6	0	0	0	0	0	0	0	0	0	0	0	0	0	0	0
AT1G08260.1	2130	S	N	NA	NA	NA	NA	ENSVATH04538630	0.0125	1	NA	0.493	0.009	0.03	3.6	-0.65	0.084764369	0.094953804	0.705339	0.517568	-1.042226114	-0.461653778	1	0	0	0	0	0	0	0	0	1	0	1	0	0	0	0
AT1G08450.1	293	P	S	In crt3-10; loss of response to the PAMP elf18, but no effect on the response to PAMP flg22.	crt3-10	PubMed:19717464	CRT3	SWISSPROT	NA	1	1	0.013	0.875	-7.042	17.5	9.99	0.977735587	0.969243535	1.61E-16	1.61E-16	-14.81155246	-14.81155246	41	0	1	1	0	1	1	1	1	1	1	1	1	1	1	1
AT1G08450.1	115	G	D	In crt3-3; loss of response to the PAMP elf18, but no effect on the response to PAMP flg22.	crt3-3	PubMed:19717464	CRT3	SWISSPROT	NA	1	1	0.001	1	-6.53	35.86	10	0.975584622	0.966884105	1.61E-16	2.11E-16	-14.01556631	-14.02567855	42	0	1	1	1	1	1	1	1	1	1	1	1	1	1	1
AT1G08450.1	142	G	E	In crt3-4; loss of response to the PAMP elf18, but no effect on the response to PAMP flg22.	crt3-4	PubMed:19717464	CRT3	SWISSPROT	NA	1	1	0	1	-7	35.36	10	0.971980872	0.962633195	5.61E-16	2.11E-16	-13.35810172	-13.36475055	42	0	1	1	1	1	1	1	1	1	1	1	1	1	1	1
AT1G08450.1	147	G	E	In crt3-5; loss of response to the PAMP elf18, but no effect on the response to PAMP flg22.	crt3-5	PubMed:19717464	CRT3	SWISSPROT	NA	1	1	0.026	1	-7.227	35.36	10	0.974405621	0.965503421	3.68E-17	1.14E-16	-13.79351954	-13.79955445	42	0	1	1	1	1	1	1	1	1	1	1	1	1	1	1
AT1G08450.1	179	H	Y	In crt3-6; loss of response to the PAMP elf18, but no effect on the response to PAMP flg22.	crt3-6	PubMed:19717464	CRT3	SWISSPROT	NA	1	1	0	1	-5.337	18.27	10	0.982719817	0.975639615	6.50E-17	2.05E-17	-15.67567227	-15.67567227	42	0	1	1	1	1	1	1	1	1	1	1	1	1	1	1
AT1G08450.1	203	G	D	In crt3-7; loss of response to the PAMP elf18, but no effect on the response to PAMP flg22.	crt3-7	PubMed:19717464	CRT3	SWISSPROT	NA	1	1	0	1	-6.884	35.86	10	0.972349163	0.963068087	1.14E-16	2.77E-16	-13.42196165	-13.4283785	42	0	1	1	1	1	1	1	1	1	1	1	1	1	1	1
AT1G08450.1	67	P	L	In psl1-1; no effect on EFR accumulation, but decreased response to the PAMP elf18.	psl1-1	PubMed:19763087	CRT3	SWISSPROT	NA	1	1	0.119	0.375	-2.65	4.25	-8.62	0.15155764	0.156095925	1.08979	1.09157	-0.115666355	-0.113341794	12	0	0	1	0	1	0	1	0	1	0	0	0	0	0	0
AT1G08450.1	244	G	S	In psl1-3; no effect on EFR accumulation, but decreased response to the PAMP elf18.	psl1-3	PubMed:19763087	CRT3	SWISSPROT	NA	1	1	0.071	0.997	-5.413	3.29	10	0.954219853	0.941939652	0.0195225	0.019529	-11.33918763	-11.34648262	41	0	0	1	1	1	1	1	0	1	1	1	1	1	1	1
AT1G08450.1	335	S	L	In psl1-4; loss of EFR accumulation and loss of response to the PAMP elf18.	psl1-4	PubMed:19763087	CRT3	SWISSPROT	NA	1	1	0.001	0.973	-4.522	5.39	8.005	0.872877181	0.856434981	0.0894212	0.0890723	-6.927617738	-6.911413896	39	0	1	1	0	1	1	1	0	1	1	1	0	1	0	1
AT1G08450.1	400	R	Q	NA	NA	NA	NA	ENSVATH01024802	0.1	1	NA	0.069	0.008	-1.373	2.02	-2.465	0.299088674	0.266926337	0.616308	0.617732	-0.515160831	-0.518048843	23	1	0	1	0	0	0	1	0	0	0	0	0	0	0	0
AT1G08450.1	412	N	Y	NA	NA	NA	NA	ENSVATH04539373	0.025	1	NA	0.141	0.101	-1.878	2.95	-5.74	0.089611228	0.046722877	0.618631	0.620113	-0.558070895	-0.562729963	8	4	0	1	0	1	0	1	0	1	0	0	0	0	0	0
AT1G08450.1	156	I	L	NA	NA	NA	NA	ENSVATH04539387	0.0125	1	NA	0.003	0.943	-1.812	10.44	10	0.981548343	0.97418611	7.84E-19	7.84E-19	-15.36344491	-15.36344491	42	0	1	1	0	1	0	1	0	1	1	1	1	1	1	1
AT1G08490.1	418	C	S	Loss of catalytic activity.	NA	PubMed:15480755	NFS2	SWISSPROT	NA	0	1	0.001	1	-8.965	14.04	9.46	0.979946853	0.971426583	1.32E-16	7.37E-17	-16	-16	39	0	1	1	1	1	1	1	1	1	1	1	1	1	1	1
AT1G08490.1	250	A	S	NA	NA	NA	NA	ENSVATH00011853	0.0625	0	NA	0.013	0.981	-2.957	23.39	10	0.983859296	0.975639615	3.68E-17	3.68E-17	-15.67567227	-16	42	0	1	1	0	1	0	1	1	1	1	1	1	1	1	1
AT1G08490.1	450	V	I	NA	NA	NA	NA	ENSVATH04539581	0.025	0	NA	0.029	0.021	-0.378	4.22	-16.7	0.110601553	0.113636677	1.19184	1.19505	-0.244545165	-0.240440176	7	0	1	1	0	0	0	0	0	1	0	0	0	0	0	0
AT1G08490.1	447	A	S	NA	NA	NA	NA	ENSVATH04539582	0.0125	0	NA	0.7	0	-0.242	2.22	-12.35	0.043659367	0.028488561	1.38309	1.23547	-0.276447464	-0.472103419	5	7	0	0	0	0	0	0	0	0	0	0	0	0	0	0
AT1G08490.1	357	I	L	NA	NA	NA	NA	ENSVATH04539590	0.0125	0	NA	1	0	1.55	0.75	-8.41	0.005185674	0.87867659	0.0450529	0.0221891	-9.839978599	-8.326767981	1	38	0	0	0	0	0	0	0	0	0	0	0	0	0	1
AT1G08490.1	213	K	Q	NA	NA	NA	NA	ENSVATH04539601	0.025	0	NA	0.047	0.037	-2.852	3.28	7.73	0.814608341	0.759857941	0.138301	0.138376	-7.159652349	-7.171296933	34	1	0	1	0	0	0	1	0	1	0	1	0	1	0	1
AT1G08490.1	210	I	V	NA	NA	NA	NA	ENSVATH04539602	0.0125	0	NA	0.232	0.005	-0.805	8.19	-9.47	0.258604094	0.215832923	0.272892	0.273264	-2.336064562	-2.345352826	14	1	0	0	0	0	0	0	0	1	0	0	0	0	0	0
AT1G08490.1	209	L	M	NA	NA	NA	NA	ENSVATH04539603	0.0125	0	NA	0.115	0.003	-0.72	2.18	-1.43	0.035977429	0.070110004	0.147697	0.130494	-6.974485232	-6.096154997	11	24	0	1	0	0	0	0	0	0	0	1	0	0	0	0
AT1G08490.1	204	N	K	NA	NA	NA	NA	ENSVATH04539604	0.0125	0	NA	0.161	0	-0.017	3.06	-11.8	0.068445516	0.073956905	0.665192	0.556078	-0.793573535	-0.496089528	1	2	0	0	0	0	0	0	0	1	0	0	0	0	0	0
AT1G08490.1	204	N	D	NA	NA	NA	NA	ENSVATH04539605	0.0125	0	NA	0.633	0	1.352	1.71	0.739	0.014526139	0.175106722	0.665192	0.556078	-0.793573535	-0.496089528	1	15	0	0	0	0	0	0	0	0	0	1	0	0	0	0
AT1G08490.1	152	Y	F	NA	NA	NA	NA	ENSVATH04539610	0.025	0	NA	0.321	0.005	-3.374	4.94	8.31	0.8703232	0.851025627	0.117666	0.117728	-7.51196849	-7.520740051	37	0	0	0	0	0	0	1	0	1	1	1	0	1	0	1
AT1G08490.1	27	C	R	NA	NA	NA	NA	ENSVATH04539618	0.0125	0	NA	0.285	0	1.04	1.3	-7.29	0.004223173	0.501907969	0.203685	0.164937	-3.904687651	-3.126781153	2	31	0	0	0	0	0	0	0	0	0	0	0	0	0	1
AT1G08490.1	388	C	S	Total loss of the Cys desulfurase activity, but only 20% decrease of the SeCys lyase activity.	NA	PubMed:16455656	NFS2	SWISSPROT	NA	0	1	0.063	0.918	-7.072	2.75	8.955	0.979972734	0.971739454	0.014505	0.0145109	-15.67567227	-15.67567227	40	0	0	1	0	1	1	1	0	0	1	1	1	1	1	1
AT1G08510.1	315	N	A	Loss of activity.	NA	PubMed:15531590	FATB	SWISSPROT	NA	0	1	NA	1	-7.217	25.8	10	0.982646636	0.975317914	7.84E-19	7.84E-19	-16	-16	41	0	NA	NA	1	1	1	1	1	1	1	1	1	1	1	1
AT1G08510.1	259	R	M	Loss of activity.	NA	PubMed:15531590	FATB	SWISSPROT	NA	0	1	0.011	1	-5.614	15.78	10	0.978047564	0.969427023	3.68E-17	7.84E-19	-14.8439751	-14.879015	41	0	1	1	1	1	1	1	1	1	1	1	1	1	1	1
AT1G08510.1	373	A	S	NA	NA	NA	NA	ENSVATH04539669	0.05	0	NA	0.845	0.034	0.279	1.72	-2.3525	0.13808341	0.106204625	1.23108	1.23943	-0.214396148	-0.206700743	14	2	0	0	0	0	0	0	0	0	0	0	0	0	0	0
AT1G08510.1	45	K	N	NA	NA	NA	NA	ENSVATH04539691	0.0125	0	NA	0.016	0.001	-1.094	6.68	-0.621	0.461204457	0.410767404	0.119165	0.119307	-7.524180682	-7.53900599	9	0	1	1	0	0	0	0	0	1	0	1	0	1	0	1
AT1G08550.1	185	C	Y	In npq1-1; loss of activity.	npq1-1	PubMed:9668132	VDE1	SWISSPROT	NA	0	1	0	1	-10.705	21.23	10	0.982646636	0.975317914	5.61E-16	5.61E-16	-16	-16	41	0	1	1	1	1	1	1	1	1	1	1	1	1	1	1
AT1G08550.1	79	P	A	NA	NA	NA	NA	ENSVATH00012013	0.6875	0	0	0.524	0	0.731	2.9	-16.1	0.017784066	0.124603679	2.81074	2.37975	-1.276725801	-1.787120208	1	12	0	0	0	0	0	0	0	1	0	0	0	0	0	0
AT1G08550.1	96	K	R	NA	NA	NA	NA	ENSVATH00012014	0.0375	0	NA	0.458	0.944	-0.647	1.93	-2.24	0.261865731	0.226359743	0.459454	0.460151	-1.220514622	-1.226174807	18	1	0	0	0	1	0	0	0	0	0	0	0	0	0	0
AT1G08550.1	48	Q	R	NA	NA	NA	NA	ENSVATH04539888	0.0125	0	NA	0	0	0.623	1.77	-11.93	0.0382042	0.007421664	0.860484	0.862825	-0.137652124	-0.140891738	11	12	1	1	0	0	0	0	0	0	0	0	0	0	0	0
AT1G08550.1	91	A	T	NA	NA	NA	NA	ENSVATH04539889	0.025	0	NA	0.609	0	0.197	3.96	-0.268	0.044281588	0.117985422	0.52628	0.466699	-1.459350242	-1.095363966	1	7	0	0	0	0	0	0	0	1	0	1	0	0	0	0
AT1G08550.1	301	N	K	NA	NA	NA	NA	ENSVATH04539893	0.0125	0	NA	0.103	0.953	-5.442	11.91	-5.49	0.972641572	0.962442476	0.0125266	0.0125288	-14.52482585	-14.52482585	39	0	0	1	0	1	1	1	1	1	0	0	1	1	1	1
AT1G08550.1	422	D	G	NA	NA	NA	NA	ENSVATH04539896	0.0125	0	NA	0.029	0.998	-5.747	20.85	6.04	0.973696688	0.963705078	1.94E-17	1.94E-17	-14.70171909	-14.70171909	39	0	1	1	1	1	1	1	1	1	0	1	1	1	1	1
AT1G08630.1	114	G	R	In tha1-1; loss of function; 50-fold increase in seed Thr content and 2-fold decrease in seedling Gly content.	tha1-1	http://www.plantcell.org/content/18/12/3564.full	THA1	BOTH	NA	1	1	0	1	-7.644	36.52	6.95	0.952279612	0.939790214	4.36E-17	1.12E-16	-11.1212904	-11.12414904	41	0	1	1	1	1	1	1	1	1	0	1	1	1	1	1
AT1G08630.1	301	L	F	NA	NA	NA	NA	ENSVATH00012231	0.1875	1	0	0.346	0.001	-1.391	3.47	-0.61	0.195847412	0.140645369	0.348729	0.348852	-2.003506716	-2.00545454	12	2	0	0	0	0	0	1	0	1	0	1	0	0	0	0
AT1G08630.1	26	N	H	NA	NA	NA	NA	ENSVATH00012240	0.25	1	0	0.172	0.002	-1.474	3.12	2.48	0.128337189	0.136238753	0.923678	0.812701	-0.250068991	-0.083250306	9	0	0	0	0	0	0	1	0	1	0	1	0	0	0	0
AT1G08630.1	276	M	I	NA	NA	NA	NA	ENSVATH04540444	0.025	1	NA	1	0	1.275	1.08	-19.9	0.006176673	0.253321019	0.273202	0.273332	-2.554641811	-2.558315859	4	28	0	0	0	0	0	0	0	0	0	0	0	0	0	0
AT1G08630.1	149	S	F	NA	NA	NA	NA	ENSVATH04540457	0.025	1	NA	0.068	0.167	-2.713	12.42	-3.13	0.234497955	0.234553549	0.607225	0.599818	-0.810301993	-0.793176822	16	0	0	1	0	1	0	1	1	1	0	0	0	0	0	0
AT1G08630.1	85	D	N	NA	NA	NA	NA	ENSVATH04540462	0.0125	1	NA	0.132	0.021	-3.051	3.52	2.53	0.833530026	0.782054228	0.0921657	0.0921845	-7.389910755	-7.39315234	35	1	0	1	0	0	0	1	0	1	0	1	0	1	0	1
AT1G08720.1	696	K	M	Loss of kinase activity.	NA	PubMed:12492839	EDR1	SWISSPROT	NA	1	1	0	1	-5.95	14.44	10	0.960627021	0.949133282	0.0172157	0.0172214	-12.07212787	-12.08040368	41	0	1	1	1	1	1	1	1	1	1	1	1	1	1	1
AT1G08720.1	61	S	C	NA	NA	NA	NA	ENSVATH00012415	0.05	1	NA	0.012	0.999	-2.582	5.32	-5.64	0.14948978	0.155675294	1.39812	1.40515	-0.339177195	-0.334140512	12	0	1	1	1	1	0	1	0	1	0	0	0	0	0	0
AT1G08720.1	385	A	G	NA	NA	NA	NA	ENSVATH00012424	0.05	1	NA	0.444	0.001	-1.024	1.68	-0.998	0.114877769	0.116225448	0.880633	0.882323	-0.138572533	-0.141145919	7	0	0	0	0	0	0	0	0	0	0	1	0	0	0	0
AT1G08720.1	395	V	E	NA	NA	NA	NA	ENSVATH00012426	0.375	1	0	0.211	0	-0.571	6.12	-1.22	0.077309681	0.077990516	1.70256	1.52524	-0.683208	-0.952016817	1	0	0	0	0	0	0	0	0	1	0	1	0	0	0	0
AT1G08720.1	626	T	A	NA	NA	NA	NA	ENSVATH00012433	0.2125	1	0	0.903	0.005	-0.482	3.45	4.25	0.235699609	0.192249778	0.32678	0.32701	-3.193747424	-3.199085061	10	1	0	0	0	0	0	0	0	1	0	1	0	0	0	0
AT1G08720.1	47	T	A	NA	NA	NA	NA	ENSVATH01025799	0.2125	1	0	0.473	0	-0.705	2.15	-16.4	0.016973688	0.073549155	2.50021	2.21844	-1.55113452	-1.966423464	4	15	0	0	0	0	0	0	0	0	0	0	0	0	0	0
AT1G08720.1	51	P	L	NA	NA	NA	NA	ENSVATH01025801	0.1375	1	0	0.084	0.924	-3.253	7.79	-7.05	0.148512482	0.163084274	3.17312	3.22281	-2.022574103	-2.004452551	12	0	0	1	0	1	0	1	0	1	0	0	0	0	0	0
AT1G08720.1	53	A	T	NA	NA	NA	NA	ENSVATH01025802	0.2125	1	0	0.682	0	0.123	2.46	-9.29	0.074210365	0.026983433	3.83139	3.13066	-1.770492218	-2.357615619	14	7	0	0	0	0	0	0	0	0	0	0	0	0	0	0
AT1G08720.1	352	A	V	NA	NA	NA	NA	ENSVATH01025817	0.0875	1	NA	0.302	0.01	0.771	3.61	2.41	0.119060316	0.065997287	1.02464	1.02694	-0.026390993	-0.0241309	15	4	0	0	0	0	0	0	0	1	0	1	0	0	0	0
AT1G08720.1	386	E	K	NA	NA	NA	NA	ENSVATH04540915	0.0125	1	NA	0.204	0.381	-1.885	3.74	5.59	0.613245829	0.554651948	0.21403	0.214275	-3.505351538	-3.512355479	31	1	0	0	0	1	0	1	0	1	0	1	0	1	0	1
AT1G08720.1	492	L	Q	NA	NA	NA	NA	ENSVATH04540916	0.025	1	NA	0.492	0.956	-2.539	3.44	-3.085	0.118736057	0.12103246	0.957498	0.958917	-0.04380755	-0.045463717	8	0	0	0	0	1	0	1	0	1	0	0	0	0	0	0
AT1G08720.1	569	S	C	NA	NA	NA	NA	ENSVATH04540919	0.0125	1	NA	0.138	0.002	-1.284	2.48	-7.165	0.119287969	0.124948937	1.78915	1.79709	-0.876834629	-0.869556867	8	0	0	1	0	0	0	1	0	0	0	0	0	0	0	0
AT1G09000.1	98	K	M	Loss of kinase activity.	NA	PubMed:10717008	ANP1	SWISSPROT	NA	1	1	NA	1	-5.958	17.24	9.99	0.982646636	0.975317914	1.61E-16	1.61E-16	-16	-16	41	0	NA	NA	1	1	1	1	1	1	1	1	1	1	1	1
AT1G09000.1	378	F	L	NA	NA	NA	NA	ENSVATH00012890	0.75	1	0	1	0	2.855	2.1	-6.95	0.011979954	0.275628667	0.417236	0.351309	-2.122096768	-1.655399472	1	19	0	0	0	0	0	0	0	0	0	0	0	0	0	0
AT1G09000.1	563	T	I	NA	NA	NA	NA	ENSVATH00012891	0.1125	1	0	0.509	0.006	0.425	1.61	-13.4	0.074620255	0.042454239	2.94049	2.96089	-2.220130177	-2.207014014	7	4	0	0	0	0	0	0	0	0	0	0	0	0	0	0
AT1G09000.1	606	K	E	NA	NA	NA	NA	ENSVATH00012892	1	1	NA	0.386	0	0.885	4.63	0.662	0.067081906	0.1020469	0.500871	0.440375	-1.767751214	-1.392548194	1	4	0	0	0	0	0	0	0	1	0	1	0	0	0	0
AT1G09000.1	460	G	R	NA	NA	NA	NA	ENSVATH01026653	0.05	1	NA	0.403	1	-1.78	3.44	-4.58	0.156996288	0.120850197	1.03295	1.03482	-0.032960558	-0.031196352	16	2	0	0	1	1	0	1	0	1	0	0	0	0	0	0
AT1G09000.1	17	S	T	NA	NA	NA	NA	ENSVATH04542351	0.0125	1	NA	0.883	0	0.962	1.78	-8.155	0.030101243	0.017612195	1.6899	1.47215	-0.548198219	-0.817882207	8	12	0	0	0	0	0	0	0	0	0	0	0	0	0	0
AT1G09000.1	20	D	N	NA	NA	NA	NA	ENSVATH04542352	0.0125	1	NA	0.627	0.296	-0.064	1.68	-0.682	0.038371773	0.044412279	1.88549	1.88081	-1.24505721	-1.247874693	4	8	0	0	0	1	0	0	0	0	0	1	0	0	0	0
AT1G09000.1	201	A	P	NA	NA	NA	NA	ENSVATH04542365	0.0125	1	NA	0.005	0.999	-4.997	38.15	9.99	0.980693495	0.972879831	4.36E-17	3.68E-17	-15.49208344	-15.49208344	41	0	1	1	1	1	1	1	1	1	1	1	1	1	1	1
AT1G09000.1	425	M	I	NA	NA	NA	NA	ENSVATH04542397	0.025	1	NA	0.644	0	0.363	1.84	-7.98	0.07235607	0.062133287	0.911969	0.914952	-0.086985561	-0.090633882	2	1	0	0	0	0	0	0	0	0	0	0	0	0	0	0
AT1G09000.1	431	K	N	NA	NA	NA	NA	ENSVATH04542398	0.0125	1	NA	0.441	0	0.842	2.71	-7.93	0.041232326	0.093273977	0.743844	0.651332	-0.616268989	-0.378406248	1	6	0	0	0	0	0	0	0	0	0	0	0	0	0	0
AT1G09000.1	445	M	L	NA	NA	NA	NA	ENSVATH04542403	0.025	1	NA	1	0.006	-0.437	4.34	6.64	0.393321146	0.269326084	0.0728581	0.0728827	-8.031218747	-8.039614848	7	2	0	0	0	0	0	0	0	1	0	1	0	1	0	0
AT1G09000.1	463	E	D	NA	NA	NA	NA	ENSVATH04542404	0.0125	1	NA	0.345	0.075	-0.461	2.39	-19.7	0.182380877	0.087496004	0.687246	0.688152	-0.550196195	-0.553313745	21	5	0	0	0	1	0	0	0	0	0	0	0	0	0	0
AT1G09000.1	468	M	I	NA	NA	NA	NA	ENSVATH04542405	0.0125	1	NA	0.145	0.028	-0.786	3.77	2.86	0.370986974	0.290282006	0.154079	0.154147	-7.090024319	-7.097713658	7	1	0	1	0	0	0	0	0	1	0	1	0	1	0	1
AT1G09000.1	610	S	R	NA	NA	NA	NA	ENSVATH04542415	0.0125	1	NA	0.012	0.334	-3.742	23.44	6.12	0.82849619	0.802612121	0.133833	0.133879	-7.713561493	-7.721246397	32	0	1	1	0	1	0	1	1	1	0	1	0	1	0	1
AT1G09010.1	464	E	A	Loss of activity in vitro.	NA	PubMed:15247239	EBM	SWISSPROT	NA	0	1	0	0.996	-5.744	24.45	10	0.964742007	0.953312577	2.30E-16	1.14E-16	-12.92727966	-12.94433122	40	0	1	1	1	1	1	1	1	1	1	1	1	1	1	1
AT1G09010.1	549	E	A	Loss of activity in vitro.	NA	PubMed:15247239	EBM	SWISSPROT	NA	0	1	0	1	-5.981	24.45	10	0.963204987	0.951531889	7.84E-19	7.84E-19	-12.72085799	-12.73739468	40	0	1	1	1	1	1	1	1	1	1	1	1	1	1	1
AT1G09010.1	855	A	V	NA	NA	NA	NA	ENSVATH00012897	0.325	0	0	0.217	0.126	-0.92	5.15	4.27	0.171676001	0.179156074	1.46183	1.47388	-0.48792292	-0.477021379	14	0	0	0	0	1	0	0	0	1	0	1	0	0	0	0
AT1G09010.1	813	R	K	NA	NA	NA	NA	ENSVATH00012899	0.4625	0	0	0.953	0	0.146	3.9	-2.6	0.047239871	0.054066412	0.724919	0.616638	-0.602826763	-0.336606298	3	6	0	0	0	0	0	0	0	1	0	0	0	0	0	0
AT1G09010.1	836	D	E	NA	NA	NA	NA	ENSVATH01026654	0.025	0	NA	0.985	0	-0.139	2.16	-18.7	0.058133162	0.019552509	2.25196	2.29032	-1.369526359	-1.339468431	9	7	0	0	0	0	0	0	0	0	0	0	0	0	0	0
AT1G09010.1	808	V	F	NA	NA	NA	NA	ENSVATH01026655	0.025	0	NA	0.705	0	0.394	1.43	6.1	0.030978993	0.036089224	0.384698	0.385373	-2.003286113	-2.012450814	8	16	0	0	0	0	0	0	0	0	0	1	0	0	0	0
AT1G09010.1	483	S	Y	NA	NA	NA	NA	ENSVATH01026659	0.0625	0	NA	0.036	0.201	-1.555	13.82	9.535	0.52873197	0.452603183	0.0262165	0.0262353	-11.11386983	-11.12549905	2	0	1	1	0	1	0	1	1	1	1	1	0	1	0	1
AT1G09010.1	90	T	N	NA	NA	NA	NA	ENSVATH01026661	0.0625	0	NA	0.296	0.003	-1.918	14.15	8.63	0.921487785	0.902537672	0.0256567	0.0256815	-10.37368222	-10.3896529	36	0	0	0	0	0	0	1	1	1	1	1	1	1	0	1
AT1G09010.1	881	V	I	NA	NA	NA	NA	ENSVATH04542441	0.0125	0	NA	0.073	0.969	-0.607	11.96	9.82	0.939510118	0.924384609	2.77E-16	2.77E-16	-10.62779891	-10.64137806	39	0	0	1	0	1	0	0	1	1	1	1	1	1	1	1
AT1G09010.1	864	V	A	NA	NA	NA	NA	ENSVATH04542443	0.0125	0	NA	0.57	0.004	-0.959	3.32	7.28	0.070211235	0.019694401	1.31452	1.32769	-0.245616494	-0.236641649	14	8	0	0	0	0	0	0	0	1	0	1	0	0	0	0
AT1G09010.1	812	S	P	NA	NA	NA	NA	ENSVATH04542444	0.0125	0	NA	0.289	0.001	-2.02	4.92	0.125	0.149046966	0.063293416	0.73767	0.652465	-0.6294203	-0.393493954	20	6	0	0	0	0	0	1	0	1	0	1	0	0	0	0
AT1G09010.1	786	K	N	NA	NA	NA	NA	ENSVATH04542446	0.0125	0	NA	0.23	0.001	1.061	4.43	3.2	0.247909697	0.234549847	0.334944	0.335675	-2.582616337	-2.596236238	11	0	0	0	0	0	0	0	0	1	0	1	0	0	0	0
AT1G09010.1	753	A	E	NA	NA	NA	NA	ENSVATH04542448	0.0125	0	NA	1	0	1.221	3.86	6.5	0.079946812	0.22824855	0.229574	0.19587	-5.024154775	-4.327557615	1	8	0	0	0	0	0	0	0	1	0	1	0	0	0	0
AT1G09010.1	718	V	G	NA	NA	NA	NA	ENSVATH04542450	0.0125	0	NA	0.006	0.932	-5.588	12.52	8.68	0.818534882	0.798652525	0.0973268	0.0974315	-5.975465077	-5.987930848	36	0	1	1	0	1	1	1	1	1	1	1	0	1	0	1
AT1G09010.1	716	A	T	NA	NA	NA	NA	ENSVATH04542451	0.0125	0	NA	0.213	0.311	-2	6.57	6.8	0.496123058	0.434825862	0.245773	0.246141	-3.369667741	-3.381901675	25	1	0	0	0	1	0	1	0	1	0	1	0	1	0	1
AT1G09010.1	710	S	L	NA	NA	NA	NA	ENSVATH04542452	0.0125	0	NA	0.192	0.003	-3.818	5.8	5.225	0.514980273	0.41334221	0.259281	0.2596	-3.282857294	-3.291974479	28	2	0	0	0	0	0	1	0	1	0	1	0	1	0	1
AT1G09010.1	701	V	I	NA	NA	NA	NA	ENSVATH04542453	0.025	0	NA	0.945	0.026	-0.533	6.93	8.07	0.855430482	0.81035977	0.0640575	0.0641237	-7.100939356	-7.113509274	38	1	0	0	0	0	0	0	0	1	1	1	0	1	0	1
AT1G09010.1	586	V	L	NA	NA	NA	NA	ENSVATH04542469	0.0125	0	NA	0.224	0.095	-2.265	7.79	4.91	0.696666816	0.681864855	0.212109	0.212383	-3.620471499	-3.631621988	34	0	0	0	0	1	0	1	0	1	0	1	0	1	0	1
AT1G09010.1	583	I	T	NA	NA	NA	NA	ENSVATH04542470	0.0125	0	NA	0.393	0.002	-2.081	3.17	6.19	0.23103127	0.160844033	0.410541	0.359409	-2.021414604	-1.557493578	18	3	0	0	0	0	0	1	0	1	0	1	0	0	0	0
AT1G09010.1	535	D	V	NA	NA	NA	NA	ENSVATH04542473	0.0125	0	NA	0.152	0.98	-4.83	7.44	4.24	0.463869444	0.448274947	0.344736	0.345238	-2.972165395	-2.983911443	23	0	0	1	0	1	1	1	0	1	0	1	0	1	0	1
AT1G09010.1	478	D	E	NA	NA	NA	NA	ENSVATH04542474	0.0125	0	NA	0.459	0.044	-2.408	6.34	4.08	0.831010369	0.780606892	0.105243	0.105366	-6.960550187	-6.976908115	36	1	0	0	0	1	0	1	0	1	0	1	0	1	0	1
AT1G09010.1	473	E	D	NA	NA	NA	NA	ENSVATH04542475	0.0125	0	NA	0.62	0.001	-0.957	3.06	-4.8	0.117961689	0.124164363	1.8924	1.9134	-0.928173203	-0.909509163	8	0	0	0	0	0	0	0	0	1	0	0	0	0	0	0
AT1G09010.1	285	L	F	NA	NA	NA	NA	ENSVATH04542488	0.0125	0	NA	0.173	0.989	-2.618	12.59	7	0.936288982	0.921564454	2.05E-16	2.77E-16	-10.02445561	-10.03834402	40	0	0	0	0	1	0	1	1	1	0	1	1	1	1	1
AT1G09010.1	149	L	V	NA	NA	NA	NA	ENSVATH04542496	0.0125	0	NA	1	0	2.42	0.24	9.06	0.005065272	0.903344847	0.0307253	5.61E-16	-10.76734181	-8.780274024	1	39	0	0	0	0	0	0	0	0	1	1	0	0	0	1
AT1G09010.1	144	S	N	NA	NA	NA	NA	ENSVATH04542497	0.0125	0	NA	0.32	0	0.299	1.31	-1.81	0.024415353	0.070926136	2.57127	2.24125	-1.393029942	-1.80359719	3	11	0	0	0	0	0	0	0	0	0	1	0	0	0	0
AT1G09010.1	93	Q	E	NA	NA	NA	NA	ENSVATH04542499	0.0125	0	NA	1	0	0.139	3.03	4.04	0.227468193	0.080221901	0.449321	0.450342	-1.390233828	-1.400151848	25	7	0	0	0	0	0	0	0	1	0	1	0	0	0	0
AT1G09010.1	35	A	D	NA	NA	NA	NA	ENSVATH04542509	0.0375	0	NA	0.274	0	-0.698	38.51	8.15	0.16457328	0.164098706	0.658147	0.660384	-0.49285955	-0.500273063	11	0	0	0	0	0	0	0	1	1	1	1	0	0	0	0
AT1G09010.1	11	F	S	NA	NA	NA	NA	ENSVATH04542510	0.0125	0	NA	1	0	3.415	0.63	4.445	0.007327166	0.340098615	0.389998	0.325997	-2.116361274	-1.619488475	1	23	0	0	0	0	0	0	0	0	0	1	0	0	0	1
AT1G09570.1	727	G	E	In HY8-3; no regulatory activity.	hy8-3	http://www.plantcell.org/content/7/9/1433.full.pdf+html	PHYA	BOTH	NA	0	1	0	1	-4.483	35.36	10	0.968359102	0.958034683	1.14E-16	1.14E-16	-13.11832838	-13.12342367	41	0	1	1	1	1	1	1	1	1	1	1	1	1	1	1
AT1G09570.1	1017	A	G	NA	NA	NA	NA	ENSVATH01028209	0.0875	0	NA	0.004	0.982	-1.602	6.83	9.77	0.830756538	0.801516951	0.0434021	0.0434144	-8.397939998	-8.397939998	30	0	1	1	0	1	0	1	0	1	1	1	0	1	0	1
AT1G09570.1	969	T	S	NA	NA	NA	NA	ENSVATH04545130	0.0125	0	NA	0.904	0.006	-0.939	2.1	2.465	0.177708859	0.076358265	0.385436	0.326423	-2.228906617	-1.726188801	18	6	0	0	0	0	0	0	0	0	0	1	0	0	0	0
AT1G09570.1	854	C	S	NA	NA	NA	NA	ENSVATH04545138	0.0125	0	NA	0.615	0.042	0.342	1.37	8.365	0.298948926	0.021906336	0.068682	0.0687041	-8.301029987	-8.309107826	24	16	0	0	0	1	0	0	0	0	1	1	0	0	0	0
AT1G09570.1	594	D	N	NA	NA	NA	NA	ENSVATH04545146	0.0125	0	NA	0.057	0.005	-1.328	3.13	6.18	0.578942872	0.466712531	0.142446	0.142511	-4.726903773	-4.732560735	27	2	0	1	0	0	0	1	0	1	0	1	0	1	0	1
AT1G09570.1	314	G	S	NA	NA	NA	NA	ENSVATH04545155	0.025	0	NA	0.003	0.998	-5.845	7.5	10	0.969450999	0.95931562	1.14E-16	1.14E-16	-13.28816494	-13.29287116	41	0	1	1	1	1	1	1	0	1	1	1	1	1	1	1
AT1G09570.1	170	I	V	NA	NA	NA	NA	ENSVATH04545156	0.0125	0	NA	0.075	0.184	-0.529	10.65	10	0.971175047	0.961340475	2.77E-16	7.84E-19	-13.567377	-13.5727509	41	0	0	1	0	1	0	0	0	1	1	1	1	1	1	1
AT1G09570.1	59	Q	E	NA	NA	NA	NA	ENSVATH04545158	0.0125	0	NA	1	0.009	-0.138	3.98	3.94	0.528416229	0.432913325	0.323882	0.324074	-2.568552602	-2.572520383	31	2	0	0	0	0	0	0	0	1	0	1	0	1	0	1
AT1G09570.1	229	E	K	NA	eid4	http://onlinelibrary.wiley.com/doi/10.1111/j.1365-313X.2004.02286.x/full	PHYA	MANUAL	NA	0	1	0.002	0.973	-3.79	19.98	10	0.974224267	0.964963241	6.50E-17	6.50E-17	-14.10393919	-14.11010806	41	0	1	1	0	1	0	1	1	1	1	1	1	1	1	1
AT1G09570.1	632	P	S	NA	phya-104	http://www.plantcell.org/content/7/9/1433.full.pdf+html	PHYA	MANUAL	NA	0	1	0.016	1	-4.73	17.5	10	0.97177391	0.962039333	5.61E-16	5.61E-16	-13.66701044	-13.67378297	41	0	1	1	1	1	1	1	1	1	1	1	1	1	1	1
AT1G09570.1	893	A	V	NA	phya-105	http://www.plantcell.org/content/7/9/1433.full.pdf+html	PHYA	MANUAL	NA	0	1	0.017	0.999	-1.865	6.46	9.03	0.886339746	0.844092564	0.0419596	0.0419711	-8.721898307	-8.72719563	37	1	1	1	1	1	0	1	0	1	1	1	0	1	0	1
AT1G09570.1	716	C	Y	NA	phya-106	http://www.plantcell.org/content/7/9/1433.full.pdf+html	PHYA	MANUAL	NA	0	1	0	1	-6.16	21.23	10	0.980165559	0.972226088	8.47E-17	1.14E-16	-15.36344491	-15.36344491	41	0	1	1	1	1	1	1	1	1	1	1	1	1	1	1
AT1G09570.1	119	E	K	NA	phya-107	http://www.plantcell.org/content/7/9/1433.full.pdf+html	PHYA	MANUAL	NA	0	1	0.377	0.786	-1.398	6.03	8.92	0.380495801	0.355931537	0.216211	0.216309	-4.00873227	-4.013838497	15	0	0	0	0	1	0	1	0	1	1	1	0	1	0	1
AT1G09570.1	768	G	D	NA	phya-108	http://www.plantcell.org/content/7/9/1433.full.pdf+html	PHYA	MANUAL	NA	0	1	0.033	1	-3.521	32.18	8.92	0.929725343	0.914794787	0.0453284	0.0453427	-9.585660014	-9.590629796	40	0	1	1	1	1	0	1	1	1	1	1	1	1	1	1
AT1G09570.1	367	G	S	NA	phya-109	http://www.plantcell.org/content/7/9/1433.full.pdf+html	PHYA	MANUAL	NA	0	1	0.014	1	-5.92	7.5	10	0.967089996	0.956550912	1.14E-16	2.77E-16	-12.92768759	-12.93344301	41	0	1	1	1	1	1	1	0	1	1	1	1	1	1	1
AT1G09570.1	279	R	S	NA	phya-110	http://www.plantcell.org/content/7/9/1433	PHYA	MANUAL	NA	0	1	0	1	-5.885	21.57	7.51	0.9504185	0.937137054	2.77E-16	2.77E-16	-11.27491775	-11.28057507	40	0	1	1	1	1	1	1	1	1	0	1	1	1	1	1
AT1G09570.1	777	E	K	NA	phya-302	http://jxb.oxfordjournals.org/content/early/2014/03/05/jxb.eru060.full	PHYA	MANUAL	NA	0	1	0.017	1	-2.067	19.98	10	0.975138958	0.966043136	2.77E-16	6.50E-17	-14.27424758	-14.28340992	41	0	1	1	1	1	0	1	1	1	1	1	1	1	1	1
AT1G09570.1	384	R	K	NA	phya-303	http://www.jbc.org/content/281/45/34421.full	PHYA	MANUAL	NA	0	1	0.005	1	-2.952	6.07	10	0.960286337	0.948732349	5.61E-16	5.61E-16	-12.01547494	-12.02191814	41	0	1	1	1	1	0	1	0	1	1	1	1	1	1	1
AT1G10290.1	51	K	E	Affects the trafficking between the Golgi apparatus and the vacuole.	NA	PubMed:11449048	DRP2A	SWISSPROT	NA	1	1	0	1	-2.967	23.7	9.43	0.967629604	0.956026026	5.32E-17	5.32E-17	-14.04663759	-14.04663759	38	0	1	1	1	1	0	1	1	1	1	1	1	1	1	1
AT1G10290.1	310	Q	H	NA	NA	NA	NA	ENSVATH00015657	0.3625	1	0	0.002	1	-3.823	11.16	-3.87	0.92185625	0.905846522	0.0910418	0.0910619	-9.439515777	-9.443071722	39	0	1	1	1	1	0	1	0	1	0	0	1	1	1	1
AT1G10290.1	840	A	T	NA	NA	NA	NA	ENSVATH00015673	0.975	1	NA	1	0	0.852	1.59	0.27	0.007663216	0.176475895	0.503118	0.446401	-1.854051924	-1.483828343	4	24	0	0	0	0	0	0	0	0	0	1	0	0	0	0
AT1G10290.1	560	P	S	NA	NA	NA	NA	ENSVATH01031453	0.0125	1	NA	0.403	0.001	-0.991	3.94	0.7405	0.183139067	0.152683749	0.456285	0.456474	-1.831505463	-1.833096476	10	1	0	0	0	0	0	0	0	1	0	1	0	0	0	0
AT1G10290.1	560	P	L	NA	NA	NA	NA	ENSVATH01031454	0.025	1	NA	0.229	0.01	-2.351	11.76	0.7405	0.202352232	0.194877399	0.456285	0.456474	-1.831505463	-1.833096476	10	0	0	0	0	0	0	1	1	1	0	1	0	0	0	0
AT1G10290.1	124	R	P	NA	NA	NA	NA	ENSVATH04548922	0.0125	1	NA	0.006	0.979	-3.763	2.88	7.15	0.825715447	0.741152217	0.0670995	0.0671146	-7.340082849	-7.343794435	36	2	1	1	0	1	0	1	0	1	0	1	0	1	0	1
AT1G10290.1	132	R	C	NA	NA	NA	NA	ENSVATH04548923	0.0125	1	NA	0.113	0.023	-1.535	9.11	5.81	0.923828983	0.906154491	0.0435646	0.0435733	-10.21205378	-10.21582507	37	0	0	1	0	0	0	1	0	1	0	1	1	1	1	1
AT1G10290.1	215	A	G	NA	NA	NA	NA	ENSVATH04548937	0.025	1	NA	0.019	0.051	-2.125	5.25	6.25	0.47465772	0.462916786	0.330394	0.330631	-2.481120354	-2.483772774	25	0	1	1	0	1	0	1	0	1	0	1	0	1	0	1
AT1G10290.1	216	L	V	NA	NA	NA	NA	ENSVATH04548938	0.0125	1	NA	0.097	0.037	-1.944	12.36	2.72	0.758670591	0.693304654	0.101143	0.101168	-6.944721078	-6.947968198	30	1	0	1	0	0	0	1	1	1	0	1	0	1	0	1
AT1G10290.1	229	P	S	NA	NA	NA	NA	ENSVATH04548939	0.0125	1	NA	0.866	0.004	-1.475	2.23	-5.045	0.189607633	0.105276386	0.581394	0.581921	-0.783873701	-0.785924792	19	4	0	0	0	0	0	1	0	0	0	0	0	0	0	0
AT1G10290.1	229	P	L	NA	NA	NA	NA	ENSVATH04548940	0.0125	1	NA	0.056	0.281	-3.385	3.13	-5.045	0.277219048	0.276958178	0.581394	0.581921	-0.783873701	-0.785924792	19	0	0	1	0	1	0	1	0	1	0	0	0	0	0	0
AT1G10290.1	487	R	H	NA	NA	NA	NA	ENSVATH04548950	0.0125	1	NA	0	1	-3.968	2.01	7.46	0.928864827	0.913964938	0.06721	0.0672253	-9.546754915	-9.550438144	40	0	1	1	1	1	0	1	0	0	0	1	1	1	1	1
AT1G10290.1	539	P	S	NA	NA	NA	NA	ENSVATH04548955	0.0125	1	NA	0.184	0	-0.147	3.07	-1.4505	0.144213589	0.119656523	0.486766	0.487019	-1.558752741	-1.560973789	7	1	0	0	0	0	0	0	0	1	0	1	0	0	0	0
AT1G10290.1	547	S	L	NA	NA	NA	NA	ENSVATH04548956	0.0125	1	NA	0.01	0.013	-2.636	4.12	3.075	0.680034551	0.667626652	0.275448	0.275525	-3.32806018	-3.329988989	34	0	1	1	0	0	0	1	0	1	0	1	0	1	0	1
AT1G10290.1	907	P	A	NA	NA	NA	NA	ENSVATH04548970	0.0125	1	NA	0.256	0.003	-1.056	4.32	-1.15	0.111970901	0.098555529	1.04416	1.04502	-0.053031212	-0.05200588	9	1	0	0	0	0	0	0	0	1	0	1	0	0	0	0
AT1G10570.1	512	C	A	Loss of peptidase activity.	NA	PubMed:16920872	ULP1C	SWISSPROT	NA	0	1	NA	0.998	-8.565	31.68	10	0.983859296	0.977064892	6.50E-17	5.04E-17	-16	-16	42	0	NA	NA	1	1	1	1	1	1	1	1	1	1	1	1
AT1G10570.1	60	L	F	NA	NA	NA	NA	ENSVATH00016242	0.3125	0	0	0.071	1	-2.295	2.31	-15.9	0.252798068	0.138847953	0.233527	0.233636	-2.171644345	-2.175732897	19	4	0	1	1	1	0	1	0	0	0	0	0	0	0	0
AT1G10570.1	391	K	Q	NA	NA	NA	NA	ENSVATH01032611	0.0125	0	NA	0.312	1	-3.076	2.46	4.64	0.869866736	0.789288315	0.0967141	0.0967316	-10.35382279	-10.35922251	32	2	0	0	1	1	0	1	0	0	0	1	0	1	0	1
AT1G10570.1	6	A	V	NA	NA	NA	NA	ENSVATH04550652	0.0625	0	NA	1	0	0.673	NA	-2.23	0.025666701	0.08607583	2.61349	0.977951	-0.008233608	-0.462036164	1	7	0	0	0	0	0	0	NA	NA	0	0	0	0	0	0
AT1G10570.1	11	R	Q	NA	NA	NA	NA	ENSVATH04550653	0.0125	0	NA	0.362	0.794	-0.418	1.75	-11.255	0.074423457	0.040457788	1.38224	1.38608	-0.354431353	-0.351263438	8	4	0	0	0	1	0	0	0	0	0	0	0	0	0	0
AT1G10570.1	13	K	E	NA	NA	NA	NA	ENSVATH04550655	0.0625	0	NA	1	0	-0.316	2.67	-8.68	0.089088499	0.041252849	1.73614	1.49965	-0.518027368	-0.806919947	12	5	0	0	0	0	0	0	0	0	0	0	0	0	0	0
AT1G10570.1	16	M	K	NA	NA	NA	NA	ENSVATH04550656	0.0625	0	NA	0.49	0	1.762	2	-15	0.017383952	0.104355838	6.20191	4.98054	-3.008174746	-3.783496298	1	10	0	0	0	0	0	0	0	0	0	0	0	0	0	0
AT1G10570.1	17	L	F	NA	NA	NA	NA	ENSVATH04550657	0.0625	0	NA	0.43	0	-0.459	1.85	0.426	0.164407689	0.049623279	0.193991	0.164677	-4.766027191	-3.980933584	13	8	0	0	0	0	0	0	0	0	0	1	0	0	0	0
AT1G10570.1	60	L	H	NA	NA	NA	NA	ENSVATH04550659	0.0125	0	NA	0.012	1	-3.977	12.03	-4.52	0.356753948	0.344215019	0.233527	0.233636	-2.171644345	-2.175732897	19	0	1	1	1	1	0	1	1	1	0	0	0	1	0	1
AT1G10570.1	165	L	P	NA	NA	NA	NA	ENSVATH04550685	0.0625	0	NA	0.047	0	0.869	4	-13.865	0.091315142	0.051088169	1.06771	0.910145	-0.088663914	-0.057957205	11	4	0	1	0	0	0	0	0	1	0	0	0	0	0	0
AT1G10570.1	216	L	V	NA	NA	NA	NA	ENSVATH04550692	0.0625	0	NA	0.489	0.001	-0.147	6.37	-18.8	0.083081653	0.0852903	1.59675	1.0664	-0.053351757	-0.527392728	3	0	0	0	0	0	0	0	0	1	0	0	0	0	0	0
AT1G10570.1	221	S	F	NA	NA	NA	NA	ENSVATH04550694	0.0125	0	NA	0.004	1	-1.066	2.3	-7.045	0.110443835	0.061286517	1.19557	1.20051	-0.138988012	-0.136177691	14	4	1	1	1	1	0	0	0	0	0	0	0	0	0	0
AT1G10570.1	230	R	Q	NA	NA	NA	NA	ENSVATH04550696	0.025	0	NA	0.526	0.152	-0.592	NA	-6.055	0.115507107	0.119117672	1.20656	1.21029	-0.141249918	-0.138900101	8	0	0	0	0	1	0	0	NA	NA	0	0	0	0	0	0
AT1G10570.1	242	N	K	NA	NA	NA	NA	ENSVATH04550697	0.175	0	0	0.827	0	0.999	1.55	-9.74	0.025566686	0.105347037	0.648257	0.554311	-0.826662192	-0.520332572	2	11	0	0	0	0	0	0	0	0	0	0	0	0	0	0
AT1G10570.1	285	S	P	NA	NA	NA	NA	ENSVATH04550703	0.0125	0	NA	0.271	0.998	-1.987	4.92	-10.395	0.131933586	0.114173475	0.751395	0.752055	-0.297970337	-0.299402707	10	1	0	0	1	1	0	1	0	1	0	0	0	0	0	0
AT1G10570.1	297	P	L	NA	NA	NA	NA	ENSVATH04550704	0.0125	0	NA	0.391	0.276	-4.885	3.15	-5.51	0.169922056	0.15050954	0.893829	0.89547	-0.104284156	-0.106330875	15	1	0	0	0	1	1	1	0	1	0	0	0	0	0	0
AT1G10570.1	324	Q	K	NA	NA	NA	NA	ENSVATH04550715	0.1	0	NA	0.102	0.024	-0.963	NA	0.145	0.026872093	0.034986445	8.13726	9.25523	-0.972051357	-0.915502367	4	0	0	1	0	0	0	0	NA	NA	0	1	0	0	0	0
AT1G10570.1	368	K	E	NA	NA	NA	NA	ENSVATH04550719	0.0375	0	NA	0.773	0	-0.733	3.97	0.329	0.125001464	0.071152872	0.244671	0.213518	-2.986935147	-2.28907744	7	4	0	0	0	0	0	0	0	1	0	1	0	0	0	0
AT1G10570.1	369	T	S	NA	NA	NA	NA	ENSVATH04550721	0.0375	0	NA	0.418	0.985	-0.415	1.9	-2.525	0.105583852	0.064518919	0.470722	0.471786	-0.688576752	-0.692437646	8	3	0	0	0	1	0	0	0	0	0	0	0	0	0	0
AT1G10570.1	416	Y	H	NA	NA	NA	NA	ENSVATH04550730	0.0125	0	NA	0.014	1	-4.883	4.29	8.78	0.978391465	0.969517098	0.0336323	0.0336364	-15.67567227	-15.67567227	39	0	1	1	1	1	1	1	0	1	1	1	1	1	1	1
AT1G10570.1	419	I	T	NA	NA	NA	NA	ENSVATH04550731	0.0125	0	NA	0.012	0.996	-4.414	14.62	10	0.759247892	0.726027295	0.108488	0.108513	-7.420216402	-7.42540972	27	0	1	1	1	1	0	1	1	1	1	1	0	1	0	1
AT1G10570.1	435	P	L	NA	NA	NA	NA	ENSVATH04550740	0.0125	0	NA	0.008	1	-9.105	4.68	7.68	0.970826894	0.951699553	0.0226096	0.0226129	-15.49208344	-15.49208344	37	1	1	1	1	1	1	1	0	1	0	1	1	1	1	1
AT1G10570.1	503	V	I	NA	NA	NA	NA	ENSVATH04550748	0.0375	0	NA	0.033	0.998	-0.926	5.16	9.04	0.981305132	0.973401954	0.0104716	0.0104728	-16	-16	40	0	1	1	1	1	0	0	0	1	1	1	1	1	1	1
AT1G10570.1	541	K	E	NA	NA	NA	NA	ENSVATH04550751	0.0625	0	NA	0.197	0.963	-3.284	7.83	4.85	0.721117765	0.683515765	0.135669	0.135701	-7.551415793	-7.556627473	24	0	0	0	0	1	0	1	0	1	0	1	0	1	0	1
AT1G10570.1	555	K	T	NA	NA	NA	NA	ENSVATH04550753	0.0625	0	NA	0.064	0.959	-4.783	4.32	-0.961	0.631388834	0.557008935	0.164546	0.164589	-5.887227479	-5.892305113	25	1	0	1	0	1	1	1	0	1	0	1	0	1	0	1
AT1G10760.1	1268	G	E	In sex1-1; induces an excess of starch in leaves after a long period of darkness.	sex1-1	http://www.jstor.org/stable/pdf/3871327.pdf?acceptTC=true	SEX1	BOTH	NA	0	1	0	1	-7.672	35.36	9.2	0.903835837	0.882871051	1.59E-16	4.36E-17	-9.667824014	-9.670896971	35	0	1	1	1	1	1	1	1	1	1	1	1	1	0	1
AT1G10760.1	867	A	S	NA	NA	NA	NA	ENSVATH00016629	0.075	0	NA	0.121	0.71	-2.582	8.3	7.685	0.79122636	0.705746452	0.124352	0.124383	-5.663572289	-5.666379445	38	2	0	1	0	1	0	1	0	1	0	1	0	1	0	1
AT1G10760.1	580	Y	C	NA	NA	NA	NA	ENSVATH00016642	0.0875	0	NA	0.058	0	-5.384	4.5	3.57	0.295376911	0.30363281	0.897114	0.897688	-0.126380669	-0.127250694	23	0	0	1	0	0	1	1	0	1	0	1	0	0	0	1
AT1G10760.1	528	S	N	NA	NA	NA	NA	ENSVATH00016643	0.05	0	NA	0.724	0	1.032	2.05	2.96	0.041551203	0.022941823	0.68387	0.684111	-0.60151486	-0.602407566	7	10	0	0	0	0	0	0	0	0	0	1	0	0	0	0
AT1G10760.1	461	G	S	NA	NA	NA	NA	ENSVATH00016644	0.0875	0	NA	0.432	0.039	-2.661	2.16	-1.14	0.242968772	0.168912932	1.17032	1.17148	-0.186782076	-0.185525991	25	3	0	0	0	1	0	1	0	0	0	1	0	0	0	0
AT1G10760.1	126	L	R	NA	NA	NA	NA	ENSVATH00016652	0.275	0	0	1	0	3.495	1.49	-0.6345	0.005867988	0.21514348	1.06111	0.942793	-0.062938708	-0.064224784	1	21	0	0	0	0	0	0	0	0	0	1	0	0	0	0
AT1G10760.1	1148	D	N	NA	NA	NA	NA	ENSVATH01033345	0.0375	0	NA	0.509	0.001	-0.062	1.4	1.81	0.167280531	0.181169644	3.10713	3.11801	-2.609381019	-2.601551296	12	0	0	0	0	0	0	0	0	0	0	1	0	0	0	0
AT1G10760.1	391	P	A	NA	NA	NA	NA	ENSVATH01033360	0.075	0	NA	0.153	0.293	-7.637	12.87	7.91	0.861726936	0.843693629	0.0795285	0.0795459	-6.789951827	-6.793174124	38	0	0	1	0	1	1	1	1	1	0	1	0	1	0	1
AT1G10760.1	165	L	I	NA	NA	NA	NA	ENSVATH01033366	0.375	0	0	0.651	0.003	0.421	1.26	3.23	0.019938282	0.025265914	0.231654	0.231729	-2.993966328	-2.995872167	12	24	0	0	0	0	0	0	0	0	0	1	0	0	0	0
AT1G10760.1	1178	T	A	NA	NA	NA	NA	ENSVATH04553033	0.025	0	NA	1	0.005	-1.16	5.16	6.99	0.183340204	0.178501318	0.482306	0.482576	-1.284725546	-1.286723717	10	0	0	0	0	0	0	0	0	1	0	1	0	0	0	0
AT1G10760.1	1177	S	N	NA	NA	NA	NA	ENSVATH04553034	0.0625	0	NA	0.411	0	-0.405	2.06	1.55	0.144095397	0.150325111	1.57175	1.5746	-0.647134729	-0.644111914	11	0	0	0	0	0	0	0	0	0	0	1	0	0	0	0
AT1G10760.1	907	V	I	NA	NA	NA	NA	ENSVATH04553052	0.05	0	NA	0.478	0.001	-0.302	2.44	-3.03	0.337582219	0.207389459	0.590799	0.591266	-0.644018148	-0.645572683	30	4	0	0	0	0	0	0	0	0	0	0	0	1	0	0
AT1G10760.1	887	E	D	NA	NA	NA	NA	ENSVATH04553054	0.0125	0	NA	0.702	0.003	-1.684	4.09	-4.08	0.125824406	0.109816519	0.874355	0.87502	-0.162071456	-0.163172875	10	1	0	0	0	0	0	1	0	1	0	0	0	0	0	0
AT1G10760.1	720	N	I	NA	NA	NA	NA	ENSVATH04553066	0.025	0	NA	0.07	0.421	-6.448	10.17	5.91	0.648829506	0.630146944	0.239876	0.23996	-4.01602164	-4.018872103	30	0	0	1	0	1	1	1	0	1	0	1	0	1	0	1
AT1G10760.1	448	G	C	NA	NA	NA	NA	ENSVATH04553082	0.0125	0	NA	0.05	0.996	-2.927	4.52	8.95	0.130088585	0.130476441	0.766527	0.767055	-0.348148476	-0.349380713	8	0	0	1	1	1	0	1	0	1	1	1	0	0	0	0
AT1G10760.1	444	L	V	NA	NA	NA	NA	ENSVATH04553084	0.0375	0	NA	0.323	0.001	0.32	6.04	2.31	0.248747032	0.199868834	0.165902	0.165942	-3.719200897	-3.721239542	9	1	0	0	0	0	0	0	0	1	0	1	0	0	0	0
AT1G10760.1	377	S	P	NA	NA	NA	NA	ENSVATH04553092	0.025	0	NA	0.27	0	-2.407	4.76	-4.465	0.139384835	0.125240577	1.52637	1.52836	-0.654894968	-0.652683648	12	1	0	0	0	0	0	1	0	1	0	0	0	0	0	0
AT1G10760.1	297	R	C	NA	NA	NA	NA	ENSVATH04553094	0.025	0	NA	0.053	0.681	-2.463	5.29	1.49	0.108900755	0.126192846	5.08358	5.12679	-4.672835264	-4.589135073	5	0	0	1	0	1	0	1	0	1	0	1	0	0	0	0
AT1G10760.1	55	Q	K	NA	NA	NA	NA	ENSVATH04553119	0.25	0	0	0.94	0	0.016	3.16	-5.76	0.027630693	0.078299761	2.33038	1.93539	-0.960050779	-1.354917832	2	9	0	0	0	0	0	0	0	1	0	0	0	0	0	0
AT1G10760.1	52	G	S	NA	NA	NA	NA	ENSVATH04553120	0.25	0	0	0.996	0.003	0.606	1.45	2.56	0.043851111	0.017015173	1.09062	1.0915	-0.102181092	-0.10117503	7	8	0	0	0	0	0	0	0	0	0	1	0	0	0	0
AT1G10760.1	50	G	R	NA	NA	NA	NA	ENSVATH04553121	0.0125	0	NA	0.017	0.999	-2.328	6.68	7.13	0.538365547	0.347331876	0.129683	0.129727	-4.414177321	-4.416930513	29	4	1	1	1	1	0	1	0	1	0	1	0	1	0	1
AT1G10840.1	178	S	A	Impaired activation of uORF-mRNA translation.	NA	PubMed:23524850	TIF3H1	SWISSPROT	NA	0	1	0.346	0.006	-1.786	9.35	7.825	0.822122368	0.776527711	0.105996	0.106022	-5.651870448	-5.654430244	39	1	0	0	0	0	0	1	0	1	0	1	0	1	0	1
AT1G10840.1	287	P	L	NA	NA	NA	NA	ENSVATH04553467	0.0125	0	NA	0.683	0.997	-3.143	25.02	8.72	0.934039629	0.919368962	0.0246116	0.0246155	-9.885792477	-9.888552312	40	0	0	0	1	1	0	1	1	1	1	1	1	1	1	1
AT1G10840.1	178	S	D	Phosphorylation mimic mutant, up-regulation of uORF-mRNA translation.	NA	PubMed:23524850	TIF3H1	SWISSPROT	NA	0	1	NA	0.879	-2.726	35.65	7.825	0.839479347	0.823555738	0.105996	0.106022	-5.651870448	-5.654430244	39	0	NA	NA	0	1	0	1	1	1	0	1	0	1	0	1
AT1G10930.1	902	Q	H	NA	NA	NA	NA	ENSVATH00016893	0.1	1	NA	0.025	0.963	-4.87	5.48	4.54	0.904288899	0.884537728	0.0638212	0.0638392	-9.406957627	-9.412237304	36	0	1	1	0	1	1	1	0	1	0	1	1	1	0	1
AT1G10930.1	73	L	V	NA	NA	NA	NA	ENSVATH00016901	0.0125	1	NA	0.038	0.649	-1.612	4.75	-4.73	0.30152381	0.233342406	0.491421	0.491887	-1.027057454	-1.029841948	23	2	0	1	0	1	0	1	0	1	0	0	0	0	0	0
AT1G10930.1	5	N	Y	NA	NA	NA	NA	ENSVATH00016903	0.0125	1	NA	0.064	0.926	-0.796	NA	-8.26	0.083614714	0.090325527	2.70153	2.85912	-0.96746585	-0.933193448	5	0	0	1	0	1	0	0	NA	NA	0	0	0	0	0	0
AT1G10930.1	1131	D	E	NA	NA	NA	NA	ENSVATH01033731	0.0375	1	NA	0.021	0.69	-2.257	5.16	-1.33	0.645947954	0.531677386	0.112997	0.113042	-5.676152057	-5.68209329	28	2	1	1	0	1	0	1	0	1	0	1	0	1	0	1
AT1G10930.1	717	T	A	NA	NA	NA	NA	ENSVATH01033741	0.0375	1	NA	0.731	0.001	-0.172	10.61	2.09	0.151133448	0.143557172	0.35743	0.357777	-1.800842938	-1.804897747	5	0	0	0	0	0	0	0	0	1	0	1	0	0	0	0
AT1G10930.1	192	G	E	NA	NA	NA	NA	ENSVATH01033753	0.0125	1	NA	0.963	0.042	-0.732	3.66	-6.14	0.115693203	0.118982585	1.98266	1.7147	-0.915988851	-1.237923415	7	0	0	0	0	1	0	0	0	1	0	0	0	0	0	0
AT1G10930.1	165	E	V	NA	NA	NA	NA	ENSVATH01033754	0.0125	1	NA	0.275	0.423	-1.519	5.23	0.812	0.18211564	0.18735603	0.98694	0.989204	-0.009333993	-0.01134073	15	0	0	0	0	1	0	1	0	1	0	1	0	0	0	0
AT1G10930.1	1158	I	V	NA	NA	NA	NA	ENSVATH04554430	0.0125	1	NA	0.696	0	-0.056	2.02	-15.2	0.025159937	0.083443043	1.68727	1.50015	-0.595096186	-0.864562018	2	10	0	0	0	0	0	0	0	0	0	0	0	0	0	0
AT1G10930.1	1152	V	I	NA	NA	NA	NA	ENSVATH04554431	0.0125	1	NA	0.572	0.002	-0.422	1.29	-2.48	0.081548152	0.022926965	1.08816	1.09006	-0.089177167	-0.087302978	16	8	0	0	0	0	0	0	0	0	0	0	0	0	0	0
AT1G10930.1	1136	S	R	NA	NA	NA	NA	ENSVATH04554434	0.0125	1	NA	0.419	0.027	-3.268	3.31	4.64	0.381137968	0.142962649	0.199815	0.199927	-4.604153115	-4.610173227	25	7	0	0	0	0	0	1	0	1	0	1	0	1	0	0
AT1G10930.1	1134	E	D	NA	NA	NA	NA	ENSVATH04554435	0.0125	1	NA	0.592	0.001	0.721	3.57	-12.6	0.209641554	0.206009469	0.495002	0.495683	-1.041552231	-1.045381747	13	0	0	0	0	0	0	0	0	1	0	0	0	0	0	0
AT1G10930.1	1130	D	Y	NA	NA	NA	NA	ENSVATH04554436	0.0125	1	NA	0.031	1	-6.57	4.7	6.26	0.334250996	0.330536749	0.456101	0.456742	-1.231276824	-1.235485384	21	0	1	1	1	1	1	1	0	1	0	1	0	1	0	1
AT1G10930.1	1099	G	E	NA	NA	NA	NA	ENSVATH04554441	0.0125	1	NA	0.327	0.106	-0.245	4.55	-0.872	0.190779573	0.18467966	0.436125	0.436517	-1.467801262	-1.471060172	10	0	0	0	0	1	0	0	0	1	0	1	0	0	0	0
AT1G10930.1	1085	Q	R	NA	NA	NA	NA	ENSVATH04554443	0.0125	1	NA	1	0	3.019	1.2	2.105	0.006346812	0.364852913	0.234659	0.193196	-3.70932889	-2.993529679	3	28	0	0	0	0	0	0	0	0	0	1	0	0	0	1
AT1G10930.1	1041	D	E	NA	NA	NA	NA	ENSVATH04554453	0.0125	1	NA	0.735	0.009	-1.18	1.88	-16.5	0.11334124	0.022011144	0.448607	0.449201	-1.293877327	-1.298280082	19	10	0	0	0	0	0	0	0	0	0	0	0	0	0	0
AT1G10930.1	1016	K	N	NA	NA	NA	NA	ENSVATH04554455	0.0125	1	NA	0.141	0.094	-0.172	2.6	-16.6	0.103198877	0.103654077	0.819022	0.820589	-0.205765075	-0.208291811	5	0	0	1	0	1	0	0	0	0	0	0	0	0	0	0
AT1G10930.1	974	V	M	NA	NA	NA	NA	ENSVATH04554465	0.0125	1	NA	0.265	0.005	-0.619	2.72	-6.96	0.066797737	0.018894096	0.731515	0.652095	-0.690623245	-0.459355244	11	8	0	0	0	0	0	0	0	0	0	0	0	0	0	0
AT1G10930.1	794	V	F	NA	NA	NA	NA	ENSVATH04554512	0.0125	1	NA	0.182	0.914	-2.994	3.76	-2.11	0.146855367	0.153968821	1.54992	1.55739	-0.387343273	-0.382490134	12	0	0	0	0	1	0	1	0	1	0	1	0	0	0	0
AT1G10930.1	700	A	T	NA	NA	NA	NA	ENSVATH04554535	0.0125	1	NA	0.166	0.049	-3.244	4.78	2.11	0.335369765	0.142143529	0.160476	0.160815	-3.3840836	-3.407502361	24	6	0	0	0	1	0	1	0	1	0	1	0	1	0	0
AT1G10930.1	690	S	A	NA	NA	NA	NA	ENSVATH04554541	0.0125	1	NA	1	0	2.256	1.51	7.265	0.007406305	0.456537895	0.104701	0.104729	-6.367741172	-6.372463122	5	34	0	0	0	0	0	0	0	0	0	1	0	0	0	1
AT1G10930.1	572	R	H	NA	NA	NA	NA	ENSVATH04554558	0.025	1	NA	0.01	0.068	-3.729	8.67	8.165	0.910432934	0.88901839	0.0321715	0.0321787	-10.40705419	-10.41250343	34	0	1	1	0	1	0	1	0	1	1	1	1	1	0	1
AT1G10930.1	527	M	L	NA	NA	NA	NA	ENSVATH04554569	0.0125	1	NA	0.52	0.11	-2.947	3.32	-3.46	0.500394679	0.17703826	0.123969	0.12402	-7.036839047	-7.043948325	26	8	0	0	0	1	0	1	0	1	0	0	0	1	0	0
AT1G10930.1	402	L	R	NA	NA	NA	NA	ENSVATH04554602	0.0125	1	NA	0.515	0.956	-2.8	31.53	-3.805	0.134002664	0.138670101	1.31219	1.31483	-0.347602795	-0.344740518	10	0	0	0	0	1	0	1	1	1	0	0	0	0	0	0
AT1G10930.1	365	M	L	NA	NA	NA	NA	ENSVATH04554604	0.025	1	NA	1	0.02	-0.202	1.81	1.21	0.149364143	0.151663514	0.868676	0.870317	-0.162269556	-0.164986441	11	0	0	0	0	0	0	0	0	0	0	1	0	0	0	0
AT1G10930.1	352	I	T	NA	NA	NA	NA	ENSVATH04554605	0.0125	1	NA	0.705	0	2.754	2.4	-2.49	0.030004556	0.088213741	4.68598	4.0824	-2.528378292	-3.205247135	1	7	0	0	0	0	0	0	0	0	0	0	0	0	0	0
AT1G10930.1	322	R	Q	NA	NA	NA	NA	ENSVATH04554608	0.0125	1	NA	0.424	0	2.331	0.84	1.1275	0.009175724	0.228484918	0.627258	0.508487	-0.926116759	-0.597350076	1	19	0	0	0	0	0	0	0	0	0	1	0	0	0	0
AT1G10930.1	296	A	T	NA	NA	NA	NA	ENSVATH04554622	0.0125	1	NA	0.248	0.011	-1.701	6.09	2.06	0.454438333	0.362274331	0.25345	0.253696	-2.14729072	-2.151781315	28	2	0	0	0	0	0	1	0	1	0	1	0	1	0	1
AT1G10930.1	262	N	S	NA	NA	NA	NA	ENSVATH04554631	0.0125	1	NA	0.967	0	0.66	1.55	-16.1	0.05556186	0.018263559	2.63316	2.26522	-1.380171289	-1.82611767	8	7	0	0	0	0	0	0	0	0	0	0	0	0	0	0
AT1G10930.1	262	N	Y	NA	NA	NA	NA	ENSVATH04554632	0.0125	1	NA	0.37	0.003	-0.681	2.76	-2.44	0.109906354	0.098506758	2.63316	2.26522	-1.380171289	-1.82611767	8	1	0	0	0	0	0	0	0	0	0	0	0	0	0	0
AT1G10930.1	261	C	Y	NA	NA	NA	NA	ENSVATH04554633	0.0125	1	NA	0.953	0.02	-0.755	3.08	-12.3	0.09608564	0.099611937	1.5076	1.51291	-0.503744446	-0.499421879	5	0	0	0	0	0	0	0	0	1	0	0	0	0	0	0
AT1G10930.1	259	E	K	NA	NA	NA	NA	ENSVATH04554634	0.0125	1	NA	0.136	0.774	-2.544	6.02	5.36	0.415044131	0.389919298	0.156927	0.157005	-3.937121067	-3.942550717	17	0	0	1	0	1	0	1	0	1	0	1	0	1	0	1
AT1G10930.1	253	S	N	NA	NA	NA	NA	ENSVATH04554635	0.0125	1	NA	0.378	0.002	0.519	1.29	-1.07	0.081062706	0.044064641	1.2981	1.30099	-0.362580324	-0.359087464	9	4	0	0	0	0	0	0	0	0	0	1	0	0	0	0
AT1G10930.1	223	D	N	NA	NA	NA	NA	ENSVATH04554642	0.075	1	NA	0.202	0.999	-4.612	14.04	8.05	0.954615257	0.939157514	0.0132872	0.01329	-13.44283941	-13.44957473	35	0	0	0	1	1	1	1	1	1	1	1	1	1	1	1
AT1G10930.1	222	V	I	NA	NA	NA	NA	ENSVATH04554643	0.025	1	NA	0.444	0.884	-0.879	2.6	3.58	0.729573472	0.705567041	0.102483	0.102515	-5.307317844	-5.31213497	31	0	0	0	0	1	0	0	0	0	0	1	0	1	0	1
AT1G10930.1	212	D	N	NA	NA	NA	NA	ENSVATH04554661	0.0125	1	NA	0.022	0.886	-3.414	4.7	7.14	0.779598903	0.714821672	0.0713675	0.0713897	-7.464488153	-7.470646654	30	1	1	1	0	1	0	1	0	1	0	1	0	1	0	1
AT1G10930.1	207	C	F	NA	NA	NA	NA	ENSVATH04554662	0.025	1	NA	0.6	0	1.205	1.67	-8.1	0.068575603	0.031732747	1.94157	1.94688	-1.405626236	-1.399042343	7	5	0	0	0	0	0	0	0	0	0	0	0	0	0	0
AT1G10930.1	204	R	G	NA	NA	NA	NA	ENSVATH04554663	0.0125	1	NA	0.382	0	0.803	1.72	-7.55	0.026025545	0.105013288	2.90271	2.43033	-1.485724597	-1.962039927	1	9	0	0	0	0	0	0	0	0	0	0	0	0	0	0
AT1G10930.1	195	A	G	NA	NA	NA	NA	ENSVATH04554664	0.0125	1	NA	0.189	0.159	-0.942	2.4	-16.1	0.130046185	0.145368189	4.16154	4.19007	-3.629642374	-3.611325212	8	0	0	0	0	1	0	0	0	0	0	0	0	0	0	0
AT1G10930.1	192	G	R	NA	NA	NA	NA	ENSVATH04554665	0.0125	1	NA	0.561	0.001	-0.351	2.48	-7.99	0.052211766	0.016829168	1.98266	1.7147	-0.915988851	-1.237923415	7	7	0	0	0	0	0	0	0	0	0	0	0	0	0	0
AT1G10930.1	184	L	V	NA	NA	NA	NA	ENSVATH04554666	0.0125	1	NA	0.322	0.1	0.149	3.39	-8.07	0.115556597	0.120350867	1.75961	1.76271	-1.020999619	-1.017255373	7	0	0	0	0	1	0	0	0	1	0	0	0	0	0	0
AT1G10930.1	174	I	V	NA	NA	NA	NA	ENSVATH04554667	0.0125	1	NA	1	0	0.27	1.46	-8.13	0.021187552	0.022160835	1.796	1.57828	-0.675645511	-0.968482471	8	15	0	0	0	0	0	0	0	0	0	0	0	0	0	0
AT1G10930.1	171	N	I	NA	NA	NA	NA	ENSVATH04554668	0.0125	1	NA	0.006	0.914	-3.209	17.84	5.23	0.275294255	0.27222914	0.447395	0.448454	-0.951865186	-0.956535547	18	0	1	1	0	1	0	1	1	1	0	1	0	0	0	0
AT1G10930.1	162	I	M	NA	NA	NA	NA	ENSVATH04554670	0.0125	1	NA	0.108	0.118	0.257	2.81	-13.4	0.096139903	0.09805047	5.9701	6.07372	-5.061569845	-5.02547311	6	1	0	1	0	1	0	0	0	0	0	0	0	0	0	0
AT1G10930.1	147	R	K	NA	NA	NA	NA	ENSVATH04554671	0.0125	1	NA	1	0.001	0.177	1.19	-4.59	0.188365118	0.146912682	1.05028	1.05268	-0.045516283	-0.043435409	19	2	0	0	0	0	0	0	0	0	0	0	0	0	0	0
AT1G10930.1	137	L	Q	NA	NA	NA	NA	ENSVATH04554672	0.0125	1	NA	0.254	0	1.619	1.73	-1.715	0.025675205	0.099242414	1.33344	1.18337	-0.199533813	-0.3884275	1	9	0	0	0	0	0	0	0	0	0	1	0	0	0	0
AT1G10930.1	133	T	S	NA	NA	NA	NA	ENSVATH04554673	0.0125	1	NA	0.812	0.001	0.152	1.68	-15	0.041238097	0.020665731	7.43307	6.1892	-3.894166344	-4.74298417	7	6	0	0	0	0	0	0	0	0	0	0	0	0	0	0
AT1G10930.1	123	S	F	NA	NA	NA	NA	ENSVATH04554674	0.025	1	NA	0.053	0.784	-3.485	3.62	-4.285	0.194533081	0.202113045	1.29137	1.29371	-0.342182409	-0.339449452	16	0	0	1	0	1	0	1	0	1	0	0	0	0	0	0
AT1G10930.1	122	I	M	NA	NA	NA	NA	ENSVATH04554675	0.0125	1	NA	0.142	0.257	0.047	NA	2.19	0.102737816	0.102628542	0.717869	0.732662	-0.080154983	-0.087715223	5	0	0	1	0	1	0	0	NA	NA	0	1	0	0	0	0
AT1G10930.1	119	A	S	NA	NA	NA	NA	ENSVATH04554677	0.0125	1	NA	0.67	0.001	0.57	2.45	-4.59	0.065328617	0.056712682	1.51733	1.28788	-0.258008999	-0.504089511	1	1	0	0	0	0	0	0	0	0	0	0	0	0	0	0
AT1G10930.1	110	S	F	NA	NA	NA	NA	ENSVATH04554679	0.0125	1	NA	0.103	0.048	-1.351	3.11	1.89	0.373147052	0.37158114	0.447413	0.447952	-0.98673291	-0.989899424	24	0	0	1	0	1	0	1	0	1	0	1	0	1	0	1
AT1G10930.1	109	D	G	NA	NA	NA	NA	ENSVATH04554680	0.0125	1	NA	0.757	0	-1.173	1.99	-9.21	0.026125091	0.102394306	2.02032	1.72308	-0.795749749	-1.132105499	1	9	0	0	0	0	0	0	0	0	0	0	0	0	0	0
AT1G10930.1	109	D	Y	NA	NA	NA	NA	ENSVATH04554681	0.0125	1	NA	0.63	0.001	-1.254	2.96	-5.02	0.067241248	0.058829142	2.02032	1.72308	-0.795749749	-1.132105499	1	1	0	0	0	0	0	0	0	1	0	0	0	0	0	0
AT1G10930.1	90	V	I	NA	NA	NA	NA	ENSVATH04554682	0.0125	1	NA	0.574	0	0.637	1.14	-15.6	0.025313359	0.018364159	1.62268	1.2784	-0.228375778	-0.49804157	8	13	0	0	0	0	0	0	0	0	0	0	0	0	0	0
AT1G10930.1	37	S	L	NA	NA	NA	NA	ENSVATH04554708	0.0375	1	NA	0.458	0.839	-2.53	7.09	-9.065	0.232967046	0.246158403	1.86062	1.86536	-0.929083346	-0.924832756	19	0	0	0	0	1	0	1	0	1	0	0	0	0	0	0
AT1G10930.1	35	S	L	NA	NA	NA	NA	ENSVATH04554709	0.0125	1	NA	0.947	0.001	1.269	2.67	-3.585	0.107792344	0.107482926	0.72932	0.729601	-0.349041038	-0.34965653	5	0	0	0	0	0	0	0	0	0	0	0	0	0	0	0
AT1G10930.1	9	R	S	NA	NA	NA	NA	ENSVATH04554712	0.0125	1	NA	0.547	0.5	-0.509	NA	-10.5	0.049886446	0.020684988	3.28682	3.32677	-1.70564181	-1.689527608	7	6	0	0	0	1	0	0	NA	NA	0	0	0	0	0	0
AT1G10930.1	7	M	T	NA	NA	NA	NA	ENSVATH04554719	0.0125	1	NA	0.209	0.191	-1.41	NA	-6.67	0.047069279	0.046428592	4.6322	5.09368	-0.881688969	-0.842222994	4	1	0	0	0	1	0	1	NA	NA	0	0	0	0	0	0
AT1G10930.1	481	K	M	NA	NA	http://nar.oxfordjournals.org/content/early/2013/10/29/nar.gkt1004.full	RECQ4A	MANUAL	NA	1	1	0	1	-5.608	17.24	9.43	0.974247057	0.963707932	2.11E-16	2.11E-16	-15.49208344	-15.49208344	37	0	1	1	1	1	1	1	1	1	1	1	1	1	1	1
AT1G10950.1	587	K	A	Abolishes Golgi retention.	NA	PubMed:22570441	TMN1	SWISSPROT	NA	0	1	NA	1	-4.711	13.68	6.15	0.763348593	0.716633077	0.18073	0.180824	-4.040400111	-4.044831983	39	1	NA	NA	1	1	1	1	1	1	0	1	0	1	0	1
AT1G10950.1	589	D	A	Abolishes Golgi retention.	NA	PubMed:22570441	TMN1	SWISSPROT	NA	0	1	0.003	1	-6.192	25.63	9.81	0.891027361	0.874992541	0.0606944	0.0607189	-7.350517155	-7.355793883	40	0	1	1	1	1	1	1	1	1	1	1	1	1	0	1
AT1G10950.1	9	V	L	NA	NA	NA	NA	ENSVATH04554818	0.0125	0	NA	0.562	NA	0.193	1.77	-19.2	0.038030164	0.066655815	3.69384	3.70704	-4.11088102	-4.098152786	4	10	0	0	NA	NA	0	0	0	0	0	0	0	0	0	0
AT1G10950.1	10	L	V	NA	NA	NA	NA	ENSVATH04554819	0.0125	0	NA	0.191	NA	-0.404	2.59	-19.2	0.120017001	0.056780142	2.95171	2.63051	-2.358392052	-2.84126068	14	5	0	0	NA	NA	0	0	0	0	0	0	0	0	0	0
AT1G10950.1	14	L	I	NA	NA	NA	NA	ENSVATH04554820	0.0125	0	NA	0.212	NA	-0.559	1.62	-15.9	0.237149788	0.218933164	1.90965	1.91333	-1.318777763	-1.313958388	20	1	0	0	NA	NA	0	0	0	0	0	0	0	0	0	0
AT1G10950.1	188	M	V	NA	NA	NA	NA	ENSVATH04554855	0.0375	0	NA	0.352	0	0.359	5.07	-7.53	0.038833419	0.084248446	0.578351	0.57933	-0.734465239	-0.738313752	2	8	0	0	0	0	0	0	0	1	0	0	0	0	0	0
AT1G10950.1	266	R	Q	NA	NA	NA	NA	ENSVATH04554876	0.0125	0	NA	0.091	0.189	-2.843	14.43	4.115	0.922352268	0.907763921	2.05E-16	5.61E-16	-8.698969983	-8.698969983	41	0	0	1	0	1	0	1	1	1	0	1	1	1	1	1
AT1G10950.1	289	V	A	NA	NA	NA	NA	ENSVATH04554878	0.0125	0	NA	0.778	0	-1.065	4	-6.26	0.192407455	0.069733722	0.884637	0.885541	-0.138325228	-0.13969554	27	7	0	0	0	0	0	0	0	1	0	0	0	0	0	0
AT1G11130.1	2	S	T	NA	NA	NA	NA	ENSVATH04555954	0.05	0	NA	NA	0	-0.913	2.85	-4.78	0.131607886	0.131444088	0.686471	0.687837	-0.332099907	-0.334876056	8	0	NA	NA	0	0	0	0	0	0	0	0	0	0	0	0
AT1G11130.1	9	F	L	NA	NA	NA	NA	ENSVATH04555955	0.0375	0	NA	0.48	0.271	-0.221	1.9	-16.1	0.069288064	0.027735764	2.15596	2.16302	-1.207480143	-1.201409428	10	6	0	0	0	1	0	0	0	0	0	0	0	0	0	0
AT1G11130.1	10	F	I	NA	NA	NA	NA	ENSVATH04555956	0.0125	0	NA	0.707	0	0.784	2.07	-4.83	0.212567556	0.212627517	0.624433	0.625074	-0.560811042	-0.563079193	15	0	0	0	0	0	0	0	0	0	0	0	0	0	0	0
AT1G11130.1	11	G	V	NA	NA	NA	NA	ENSVATH04555957	0.0625	0	NA	0.017	0	1.015	2.02	3.01	0.011766275	0.11076918	0.846032	0.669474	-0.390510176	-0.13825596	3	17	1	1	0	0	0	0	0	0	0	1	0	0	0	0
AT1G11130.1	22	S	T	NA	NA	NA	NA	ENSVATH04555959	0.0625	0	NA	0.501	0.271	-1.857	2.47	-2.17	0.24049988	0.243177919	0.697186	0.697739	-0.344578213	-0.345741614	18	0	0	0	0	1	0	1	0	0	0	1	0	0	0	0
AT1G11130.1	57	C	Y	NA	sub-10	http://journals.plos.org/plosone/article?id=10.1371/journal.pone.0019730	SUB	MANUAL	NA	0	1	0	0.827	-9.68	15.95	8.65	0.979859378	0.971338963	0.0216017	0.0216039	-16	-16	39	0	1	1	0	1	1	1	1	1	1	1	1	1	1	1
AT1G11130.1	64	V	M	In sub-3; loss of function.	sub-3	http://journals.plos.org/plosone/article?id=10.1371/journal.pone.0019730	SUB	BOTH	NA	0	1	0.005	0.974	-2.534	9.76	7.7	0.955290931	0.941137572	0.0370869	0.0370911	-12.8559803	-12.85701957	37	0	1	1	0	1	0	1	0	1	0	1	1	1	1	1
AT1G11130.1	285	A	D	NA	NA	NA	NA	ENSVATH04555989	0.025	0	NA	0.408	0.014	-0.604	NA	-0.339	0.042242152	0.070879197	10	10	-5.05513009	-4.550831812	5	0	0	0	0	0	0	0	NA	NA	0	1	0	0	0	0
AT1G11130.1	304	P	L	In sub-15; loss of function.	sub-15	http://journals.plos.org/plosone/article?id=10.1371/journal.pone.0019730	SUB	BOTH	NA	0	1	0.038	0.958	-2.999	7.82	-4.405	0.289423364	0.28510235	0.484938	0.485194	-1.316436981	-1.31865563	18	0	0	1	0	1	0	1	0	1	0	0	0	0	0	0
AT1G11130.1	349	V	M	NA	NA	NA	NA	ENSVATH04555990	0.0125	0	NA	0.096	0.986	-0.722	6.03	5.97	0.354164322	0.32682543	0.211185	0.211236	-4.509507765	-4.51244168	12	0	0	1	0	1	0	0	0	1	0	1	0	1	0	1
AT1G11130.1	369	K	E	NA	NA	NA	NA	ENSVATH04555991	0.0125	0	NA	0.079	0.98	-0.832	4.71	-1.43	0.318188248	0.271112435	0.333206	0.333335	-2.383872271	-2.386617019	18	1	0	1	0	1	0	0	0	1	0	1	0	1	0	0
AT1G11130.1	426	Q	R	NA	NA	NA	NA	ENSVATH04555993	0.0125	0	NA	0.445	0.002	-1.23	3.72	-6.965	0.066898748	0.057878421	1.67576	1.4592	-0.502657001	-0.775283107	1	1	0	0	0	0	0	0	0	1	0	0	0	0	0	0
AT1G11130.1	456	P	L	NA	NA	NA	NA	ENSVATH04555994	0.025	0	NA	0.011	0.999	-5.176	5.53	5.475	0.818613653	0.79100622	0.0707505	0.0707603	-7.683570424	-7.687025474	31	0	1	1	1	1	1	1	0	1	0	1	0	1	0	1
AT1G11130.1	465	A	G	NA	NA	NA	NA	ENSVATH04555995	0.025	0	NA	0.492	0.993	-1.691	3.43	-0.0244	0.179522058	0.092831581	0.245424	0.24552	-2.557551589	-2.560626248	12	4	0	0	1	1	0	1	0	1	0	1	0	0	0	0
AT1G11130.1	545	S	F	In sub-19; loss of function.	sub-19	http://journals.plos.org/plosone/article?id=10.1371/journal.pone.0019730	SUB	BOTH	NA	0	1	0.027	0.996	-4.413	3.57	2.38	0.488027199	0.430109507	0.197161	0.197208	-2.836272264	-2.839303427	26	1	1	1	1	1	0	1	0	1	0	1	0	1	0	1
AT1G11130.1	595	T	N	NA	NA	NA	NA	ENSVATH00017148	0.0875	0	NA	0.009	0.992	-0.866	11.17	6.49	0.415985759	0.376969475	0.132691	0.132719	-6.000594956	-6.003974116	11	0	1	1	0	1	0	0	0	1	0	1	0	1	0	1
AT1G11130.1	599	R	C	In sub-4; loss of function.	sub-4	http://journals.plos.org/plosone/article?id=10.1371/journal.pone.0019730	SUB	BOTH	NA	0	1	0	0.999	-7.987	29.01	10	0.983859296	0.977064892	1.61E-16	4.36E-17	-16	-16	42	0	1	1	1	1	1	1	1	1	1	1	1	1	1	1
AT1G11130.1	667	E	D	NA	NA	NA	NA	ENSVATH00017149	0.025	0	NA	0.329	0.98	-2.186	2.97	-6.47	0.844218844	0.68415404	0.0794109	0.0794197	-10.16855129	-10.17258161	33	4	0	0	0	1	0	1	0	1	0	0	0	1	0	1
AT1G12110.1	476	E	A	80% reduction of the transporter activity.	NA	PubMed:24572362	NPF6.3	SWISSPROT	NA	0	1	0.004	0.999	-5.294	24.45	9.72	0.981344594	0.973441486	7.84E-19	7.84E-19	-16	-16	40	0	1	1	1	1	1	1	1	1	1	1	1	1	1	1
AT1G12110.1	130	C	A	90% reduction of the transporter activity.	NA	PubMed:24572362	NPF6.3	SWISSPROT	NA	0	1	NA	1	-8.411	31.68	8.81	0.981344594	0.973441486	2.30E-16	2.05E-17	-16	-16	40	0	NA	NA	1	1	1	1	1	1	1	1	1	1	1	1
AT1G12110.1	164	K	A	90% reduction of the transporter activity.	NA	PubMed:24572362, PubMed:24572366	NPF6.3	SWISSPROT	NA	0	1	NA	1	-5.916	26.45	10	0.982646636	0.975317914	6.50E-17	2.05E-17	-16	-16	41	0	NA	NA	1	1	1	1	1	1	1	1	1	1	1	1
AT1G12110.1	492	P	L	In chl1-9; loss of high- and low-affinity nitrate transport, but no effect on nitrate sensing.	chl1-9	PubMed:19766570	NPF6.3	SWISSPROT	NA	0	1	0	1	-9.046	26.92	9.72	0.981344594	0.973441486	4.36E-17	4.36E-17	-16	-16	40	0	1	1	1	1	1	1	1	1	1	1	1	1	1	1
AT1G12110.1	101	T	D	Loss of low-affinity nitrate transport.	NA	PubMed:12606566, PubMed:24572366	NPF6.3	SWISSPROT	NA	0	1	NA	0.994	-5.634	37.39	10	0.982646636	0.975317914	6.50E-17	4.36E-17	-16	-16	41	0	NA	NA	1	1	1	1	1	1	1	1	1	1	1	1
AT1G12110.1	101	T	A	Loss of phosphorylation and 91% reduction of high-affinity nitrate transport, but no effect on the nitrate binding.	NA	PubMed:12606566, PubMed:24572366	NPF6.3	SWISSPROT	NA	0	1	0.025	0.99	-4.697	37.99	10	0.982646636	0.975317914	6.50E-17	4.36E-17	-16	-16	41	0	1	1	0	1	1	1	1	1	1	1	1	1	1	1
AT1G12110.1	41	E	A	Loss of the transporter activity.	NA	PubMed:24572362	NPF6.3	SWISSPROT	NA	0	1	0.024	1	-5.18	24.45	10	0.982646636	0.975317914	1.94E-17	5.97E-18	-16	-16	41	0	1	1	1	1	1	1	1	1	1	1	1	1	1	1
AT1G12110.1	44	E	A	Loss of the transporter activity.	NA	PubMed:24572362	NPF6.3	SWISSPROT	NA	0	1	0	1	-5.235	24.45	10	0.982646636	0.975317914	5.97E-18	5.97E-18	-16	-16	41	0	1	1	1	1	1	1	1	1	1	1	1	1	1	1
AT1G12110.1	45	R	A	Loss of the transporter activity.	NA	PubMed:24572362, PubMed:24572366	NPF6.3	SWISSPROT	NA	0	1	NA	1	-5.235	25.85	7.625	0.982646636	0.975317914	7.84E-19	7.84E-19	-16	-16	41	0	NA	NA	1	1	1	1	1	1	0	1	1	1	1	1
AT1G12110.1	356	H	A	Loss of the transporter activity.	NA	PubMed:24572362, PubMed:24572366	NPF6.3	SWISSPROT	NA	0	1	NA	0.375	-4.887	20.39	8.985	0.892473503	0.847900963	0.0225721	0.0225783	-16	-16	15	0	NA	NA	0	1	1	1	1	1	1	1	1	1	0	1
AT1G12110.1	10	D	E	NA	NA	NA	NA	ENSVATH04562731	0.0125	0	NA	1	0	1.112	2.73	-13.5	0.138953804	0.067812013	0.22239	0.222613	-3.512390805	-3.526359777	5	4	0	0	0	0	0	0	0	0	0	0	0	0	0	0
AT1G12110.1	290	M	V	NA	NA	NA	NA	ENSVATH04562751	0.025	0	NA	0.306	0	-0.416	4.77	4.04	0.197901434	0.083098404	0.149486	0.14955	-4.975937339	-4.985391267	8	5	0	0	0	0	0	0	0	1	0	1	0	0	0	0
AT1G12110.1	306	D	N	NA	NA	NA	NA	ENSVATH04562767	0.0125	0	NA	0.004	1	-4.808	13.97	10	0.982646636	0.975317914	6.50E-17	6.50E-17	-16	-16	41	0	1	1	1	1	1	1	1	1	1	1	1	1	1	1
AT1G12110.1	442	L	R	NA	NA	NA	NA	ENSVATH04562768	0.025	0	NA	0.766	0	-1.892	3.25	-3.205	0.056454608	0.018430932	1.37391	1.37999	-0.355650051	-0.350082254	9	7	0	0	0	0	0	1	0	1	0	0	0	0	0	0
AT1G12220.1	189	K	N	Abolishes RPS5-mediated plant resistance to P.syringae.	NA	PubMed:17277084	RPS5	SWISSPROT	NA	1	1	0	0.999	-3.631	14.55	-0.794	0.981344594	0.973441486	6.50E-17	6.50E-17	-16	-16	40	0	1	1	1	1	0	1	1	1	0	1	1	1	1	1
AT1G12220.1	2	G	A	Affects plasma membrane location.	NA	PubMed:22046960	RPS5	SWISSPROT	NA	1	1	0	0.988	-4.341	NA	1.89	0.387366282	0.279897057	0.0433197	0.0433554	-5.127601872	-5.138773348	15	2	1	1	0	1	0	1	NA	NA	0	1	0	1	0	0
AT1G12220.1	6	S	A	Affects plasma membrane location.	NA	PubMed:22046960	RPS5	SWISSPROT	NA	1	1	0.03	0.953	-1.997	NA	1.048	0.250821487	0.208640198	0.195793	0.197288	-2.051866383	-2.079564115	14	1	1	1	0	1	0	1	NA	NA	0	1	0	0	0	0
AT1G12220.1	799	P	S	In rps5-1; impairs defense reaction against pathogens.	rps5-1	NA	RPS5	SWISSPROT	NA	1	1	0.007	1	-6.781	2.79	1.2565	0.493746447	0.382822221	0.190574	0.190724	-4.535659515	-4.550925999	23	2	1	1	1	1	1	1	0	0	0	1	0	1	0	1
AT1G12220.1	572	E	K	In rps5-1; impairs defense reaction against pathogens.;	rps5-1	NA	RPS5	SWISSPROT	NA	1	1	0.53	0.006	-0.304	2.73	-8.04	0.101440288	0.087965208	0.903248	0.910928	-0.081785075	-0.088554201	7	1	0	0	0	0	0	0	0	0	0	0	0	0	0	0
AT1G12220.1	266	D	E	Induces RPS5-mediated plant resistance to P.syringae.	NA	PubMed:17277084	RPS5	SWISSPROT	NA	1	1	0.01	1	-3.169	23.17	-1.45	0.979923273	0.971402911	0.005832	0.00584306	-16	-16	39	0	1	1	1	1	0	1	1	1	0	1	1	1	1	1
AT1G12220.1	502	R	G	NA	NA	NA	NA	ENSVATH01040392	0.15	1	0	0.037	0.766	-3.618	6.29	1.53	0.436415967	0.412222934	0.226372	0.227548	-3.689017962	-3.729183795	19	0	1	1	0	1	0	1	0	1	0	1	0	1	0	1
AT1G12220.1	785	I	L	NA	NA	NA	NA	ENSVATH01040395	0.0125	1	NA	0.016	0.972	-1.757	3.5	0.473	0.825099614	0.688892293	0.0788572	0.0788401	-9.918785594	-9.979385591	30	3	1	1	0	1	0	1	0	1	0	1	0	1	0	1
AT1G12220.1	117	G	E	NA	NA	NA	NA	ENSVATH04563420	0.0125	1	NA	0.002	1	-6.276	6.27	7.42	0.853296207	0.81310776	0.0717561	0.0718466	-11.18098675	-11.28510636	24	0	1	1	1	1	1	1	0	1	0	1	0	1	0	1
AT1G12220.1	278	V	F	NA	NA	NA	NA	ENSVATH04563424	0.0125	1	NA	0.003	0.983	-3.927	4.38	2.02	0.724519256	0.671053104	0.0778297	0.077862	-9.972356476	-9.99142495	17	0	1	1	0	1	0	1	0	1	0	1	0	1	0	1
AT1G12220.1	455	I	L	NA	NA	NA	NA	ENSVATH04563427	0.025	1	NA	0.059	0.934	-1.503	4.9	0.136	0.65644544	0.238778663	0.100005	0.100062	-10.94427009	-10.96266515	25	9	0	1	0	1	0	1	0	1	0	1	0	1	0	0
AT1G12220.1	772	F	C	NA	NA	NA	NA	ENSVATH04563428	0.025	1	NA	0.18	0.896	-1.652	2.4	-20	0.09625254	0.099610337	1.36593	1.38965	-0.409194934	-0.372208252	5	0	0	0	0	1	0	1	0	0	0	0	0	0	0	0
AT1G12220.1	831	H	R	NA	NA	NA	NA	ENSVATH04563429	0.0125	1	NA	0.501	0	-1.35	2.51	-13.43	0.074036202	0.051387991	3.43323	3.75443	-3.515580568	-3.096638121	4	3	0	0	0	0	0	1	0	0	0	0	0	0	0	0
AT1G12220.1	865	E	Q	NA	NA	NA	NA	ENSVATH04563430	0.0125	1	NA	0.168	0.225	-1.029	2.25	-9.81	0.07732511	0.049536751	1.25812	1.20319	-0.172679846	-0.192193116	7	3	0	0	0	1	0	0	0	0	0	0	0	0	0	0
AT1G12220.1	887	R	K	NA	NA	NA	NA	ENSVATH04563431	0.0375	1	NA	0	0.007	0.213	NA	-10.8	0.060031829	0.048820918	1.95272	1.17127	-0.097815918	-0.3897296	3	2	1	1	0	0	0	0	NA	NA	0	0	0	0	0	0
AT1G12480.1	450	F	G	Enhanced and constitutive anion transport activity.	NA	Ref.11	SLAC1	SWISSPROT	NA	0	1	NA	1	-7.813	22.93	10	0.981344594	0.973441486	7.84E-19	9.76E-17	-16	-16	40	0	NA	NA	1	1	1	1	1	1	1	1	1	1	1	1
AT1G12480.1	450	F	L	Impaired anion transport activity.	NA	Ref.11	SLAC1	SWISSPROT	NA	0	1	0.006	1	-5.187	12.82	10	0.981344594	0.973441486	7.84E-19	9.76E-17	-16	-16	40	0	1	1	1	1	1	1	1	1	1	1	1	1	1	1
AT1G12480.1	456	S	F	In slac1-1; reduced slow (S-type) anion channel currents, and increased water loss due to impaired stomatal closure.	slac1-1	PubMed:18305484, Ref.11	SLAC1	SWISSPROT	NA	0	1	0.002	0.999	-4.327	17.48	8.86	0.901658347	0.878674458	0.0486869	0.0486986	-10.28515995	-10.29061215	33	0	1	1	1	1	0	1	1	1	1	1	1	1	0	1
AT1G12480.1	38	S	F	In slac1-6; normal ozone-triggered rapid transient decrease (RTD) in stomatal conductance.;	slac1-6	NA	SLAC1	SWISSPROT	NA	0	1	0.006	0.384	-1.446	4.84	-0.585	0.355270068	0.348506052	0.384676	0.385043	-1.597286499	-1.601912356	21	0	1	1	0	1	0	1	0	1	0	1	0	1	0	1
AT1G12480.1	120	S	F	In slac1-7; impaired ozonetriggered rapid transient decrease (RTD) in stomatal conductance.	slac1-7	PubMed:20128877	SLAC1	SWISSPROT	NA	0	1	0.002	1	-4.179	22.65	9.23	0.966718116	0.953703096	0.0137444	0.0137473	-14.95892289	-14.95892289	35	0	1	1	1	1	0	1	1	1	1	1	1	1	1	1
AT1G12480.1	146	S	F	In slac1-8; impaired ozone-triggered rapid transient decrease (RTD) in stomatal conductance.	slac1-8	PubMed:20128877	SLAC1	SWISSPROT	NA	0	1	0.046	0.955	-3.361	4.39	-1.218	0.319090713	0.316929769	0.438101	0.438812	-0.891056318	-0.895919376	21	0	0	1	0	1	0	1	0	1	0	1	0	1	0	1
AT1G12480.1	547	D	E	NA	NA	NA	NA	ENSVATH04565116	0.0125	0	NA	0.911	0.015	-1.059	2.7	-8.99	0.504397288	0.110119478	0.0709698	0.0709879	-9.136344051	-9.145293195	25	11	0	0	0	0	0	0	0	0	0	0	0	1	0	0
AT1G12480.1	546	K	R	NA	NA	NA	NA	ENSVATH04565117	0.025	0	NA	0.103	0.989	-1.763	3.18	8.76	0.972785734	0.961953839	0.0387889	0.0387975	-15.26433005	-15.26433005	37	0	0	1	0	1	0	1	0	1	1	1	1	1	1	1
AT1G12480.1	484	A	V	NA	NA	NA	NA	ENSVATH04565118	0.0125	0	NA	1	0.58	-0.1	2.46	7.89	0.223183004	0.136521337	0.206754	0.206861	-2.868137635	-2.874707458	13	3	0	0	0	1	0	0	0	0	0	1	0	0	0	0
AT1G12480.1	379	S	T	NA	NA	NA	NA	ENSVATH04565126	0.0125	0	NA	0.01	0.408	-1.993	3.38	9.405	0.945623215	0.922174802	0.00850468	0.00850636	-16	-16	25	0	1	1	0	1	0	1	0	1	1	1	1	1	1	1
AT1G12480.1	231	F	I	NA	NA	NA	NA	ENSVATH04565130	0.0125	0	NA	0.971	0	2.647	2.93	3.8	0.229684541	0.204660406	0.0622935	0.0623121	-8.080405765	-8.086704957	3	6	0	0	0	0	0	0	0	1	0	1	0	0	0	0
AT1G12480.1	223	L	S	NA	NA	NA	NA	ENSVATH04565131	0.0125	0	NA	0.882	0.023	-0.701	2.93	-1.11	0.173918934	0.164171376	0.351127	0.351353	-2.233665988	-2.238099963	6	0	0	0	0	0	0	0	0	1	0	1	0	0	0	0
AT1G12480.1	127	R	K	NA	NA	NA	NA	ENSVATH04565134	0.0375	0	NA	0.443	0.001	0.248	1.83	1.14	0.340552783	0.244362443	0.186671	0.186771	-4.666371388	-4.674628031	14	2	0	0	0	0	0	0	0	0	0	1	0	1	0	0
AT1G12480.1	56	R	K	NA	NA	NA	NA	ENSVATH04565135	0.0125	0	NA	0.062	0.999	-1.714	4.68	7.58	0.940891617	0.90834643	0.0131389	0.0131425	-13.06032852	-13.06871965	34	1	0	1	1	1	0	1	0	1	0	1	1	1	1	1
AT1G12480.1	30	E	K	NA	NA	NA	NA	ENSVATH04565137	0.0125	0	NA	0.053	0.659	-0.572	3.51	-1.99	0.118463084	0.124341094	1.66213	1.72568	-0.397883554	-0.366200395	9	0	0	1	0	1	0	0	0	1	0	1	0	0	0	0
AT1G12480.1	194	G	D	NA	slac1-2	http://www.nature.com/nature/journal/v452/n7186/full/nature06720.html	SLAC1	MANUAL	NA	0	1	0.01	1	-6.985	35.86	10	0.981344594	0.973441486	2.77E-16	2.77E-16	-16	-16	40	0	1	1	1	1	1	1	1	1	1	1	1	1	1	1
AT1G12480.1	120	S	D	NA	NA	http://www.pnas.org/content/106/50/21425.full	SLAC1	MANUAL	NA	0	1	NA	1	-3.157	36.33	9.23	0.966718116	0.953703096	0.0137444	0.0137473	-14.95892289	-14.95892289	35	0	NA	NA	1	1	0	1	1	1	1	1	1	1	1	1
AT1G12770.1	228	G	E	In ise1-1; increased PD-mediated transport, with higher frequency of branched and twinned PD, and impaired mitochondrial metabolism accompanied by a disrupted mitochondrial proton gradient and an increased production of reactive oxygen species.	ise1-1	PubMed:19805190	RH47	SWISSPROT	NA	0	1	0	1	-7.647	35.36	8.06	0.979108642	0.970923625	7.84E-19	7.84E-19	-15.11569526	-15.11569526	41	0	1	1	1	1	1	1	1	1	1	1	1	1	1	1
AT1G12770.1	358	M	I	NA	NA	NA	NA	ENSVATH00020610	0.2	0	0	0.239	0	0.042	1.81	-12.8	0.043715051	0.11656633	0.550774	0.487283	-1.403123726	-1.055942454	1	7	0	0	0	0	0	0	0	0	0	0	0	0	0	0
AT1G12770.1	53	L	V	NA	NA	NA	NA	ENSVATH04566965	0.0125	0	NA	0.122	0.729	-0.761	5.05	0.0804	0.844742818	0.795866237	0.098939	0.0989814	-7.435979347	-7.443697498	36	1	0	1	0	1	0	0	0	1	0	1	0	1	0	1
AT1G12770.1	264	H	Y	NA	NA	NA	NA	ENSVATH04566971	0.0125	0	NA	0.061	0.998	-4.117	3.03	5.69	0.638981468	0.608968184	0.179997	0.180112	-5.472969762	-5.482672118	25	0	0	1	1	1	0	1	0	1	0	1	0	1	0	1
AT1G12770.1	281	S	L	NA	NA	NA	NA	ENSVATH04566973	0.0125	0	NA	0.038	0.977	-4.642	8.55	7.035	0.876398342	0.856949865	0.0719213	0.0719462	-7.726457064	-7.733596593	37	0	0	1	0	1	1	1	0	1	0	1	0	1	0	1
AT1G12770.1	349	D	E	NA	NA	NA	NA	ENSVATH04566974	0.0125	0	NA	1	0.001	0.372	1.74	-12.8	0.168353778	0.01111819	0.153961	0.154064	-5.931628582	-5.94136523	21	16	0	0	0	0	0	0	0	0	0	0	0	0	0	0
AT1G12770.1	352	Q	H	NA	NA	NA	NA	ENSVATH04566975	0.0125	0	NA	0.113	0.006	-1.454	11.26	-11.2	0.176416922	0.169034333	0.374793	0.375286	-1.646039554	-1.652812496	8	0	0	1	0	0	0	1	1	1	0	0	0	0	0	0
AT1G12770.1	402	V	I	NA	NA	NA	NA	ENSVATH04566976	0.025	0	NA	0.895	0.183	0.05	2.12	-0.28	0.251547435	0.025871098	0.134066	0.134141	-5.751536282	-5.759221185	25	14	0	0	0	1	0	0	0	0	0	1	0	0	0	0
AT1G12860.1	203	R	H	Excessive stomatal differentiation.	NA	PubMed:18641265	SCRM2	SWISSPROT	NA	1	1	NA	1	-4.875	10.52	5.91	0.942168437	0.926561306	0.0361061	0.0361507	-11.21623788	-11.24383038	38	0	NA	NA	1	1	1	1	0	1	0	1	1	1	1	1
AT1G12860.1	54	F	L	NA	NA	NA	NA	ENSVATH01044276	0.0125	1	NA	0.761	0.98	-2.468	1.67	-3.25	0.130455391	0.0587131	0.540897	0.54459	-0.946525876	-0.969367899	14	5	0	0	0	1	0	1	0	0	0	0	0	0	0	0
AT1G12860.1	86	D	N	NA	NA	NA	NA	ENSVATH01044277	0.75	1	0	0.26	0.997	-2.433	2.83	5.42	0.758765706	0.646557146	0.0984881	0.0987249	-8.170863537	-8.214380488	28	2	0	0	1	1	0	1	0	0	0	1	0	1	0	1
AT1G12860.1	88	A	T	NA	NA	NA	NA	ENSVATH01044278	0.75	1	0	0.126	0.009	-0.141	NA	-2.96	0.092703894	0.094588233	2.21155	2.79759	-0.397250029	-0.302318285	7	0	0	1	0	0	0	0	NA	NA	0	0	0	0	0	0
AT1G12860.1	123	T	S	NA	NA	NA	NA	ENSVATH01044285	0.025	1	NA	0.64	0	0.209	3.74	1.995	0.159120582	0.091481753	0.259348	0.260137	-3.698917892	-3.728574308	5	3	0	0	0	0	0	0	0	1	0	1	0	0	0	0
AT1G12860.1	211	S	T	NA	NA	NA	NA	ENSVATH01044287	0.75	1	0	0.575	0.816	-1.34	3.79	-7.05	0.147060602	0.12794452	0.812305	0.820789	-0.241125183	-0.2587294	12	1	0	0	0	1	0	1	0	1	0	0	0	0	0	0
AT1G12860.1	216	N	K	NA	NA	NA	NA	ENSVATH01044288	0.425	1	0	0.922	0.175	-2.635	4.42	-0.486	0.599811343	0.51332308	0.109437	0.109678	-6.897010917	-6.937376656	20	1	0	0	0	1	0	1	0	1	0	1	0	1	0	1
AT1G12860.1	219	S	T	NA	NA	NA	NA	ENSVATH01044290	0.0875	1	NA	0.55	0.638	-0.758	4.28	1.15	0.183444595	0.176439918	0.484196	0.486703	-1.608683729	-1.636232003	9	0	0	0	0	1	0	0	0	1	0	1	0	0	0	0
AT1G12860.1	239	I	T	NA	NA	NA	NA	ENSVATH01044291	0.0125	1	NA	0.712	0.915	0.183	3	6.37	0.712667921	0.638768941	0.068991	0.0690891	-12.76964306	-12.80880338	8	0	0	0	0	1	0	0	0	1	0	1	0	1	0	1
AT1G12860.1	394	M	I	NA	NA	NA	NA	ENSVATH01044305	0.0125	1	NA	0.021	0.424	-3.453	19.81	10	0.981300632	0.97339739	0.0116644	0.0116811	-16	-16	40	0	1	1	0	1	0	1	1	1	1	1	1	1	1	1
AT1G12860.1	22	A	S	NA	NA	NA	NA	ENSVATH04567442	0.0125	1	NA	0.934	0.003	0.165	1.68	-7.335	0.044453001	0.008770424	1.78382	1.81723	-0.993281584	-0.956280215	10	10	0	0	0	0	0	0	0	0	0	0	0	0	0	0
AT1G12860.1	46	N	K	NA	NA	NA	NA	ENSVATH04567443	0.0125	1	NA	0.921	0.018	-0.698	1.52	-3.45	0.087031631	0.063730892	0.861417	0.870134	-0.164935644	-0.179870162	6	2	0	0	0	0	0	0	0	0	0	0	0	0	0	0
AT1G12860.1	191	A	V	NA	NA	NA	NA	ENSVATH04567445	0.1	1	NA	0.04	0.981	-1.945	3.96	8.81	0.476140806	0.380613625	0.108695	0.108888	-8.008509878	-8.042610149	10	1	0	1	0	1	0	1	0	1	1	1	0	1	0	1
AT1G12860.1	327	P	S	NA	NA	NA	NA	ENSVATH04567446	0.0125	1	NA	0.041	0.008	-7.122	6.66	8.31	0.933242835	0.883633744	0.0502924	0.0503713	-11.66010356	-11.69732065	38	2	0	1	0	0	1	1	0	1	1	1	1	1	0	1
AT1G12860.1	430	D	E	NA	NA	NA	NA	ENSVATH04567451	0.0125	1	NA	0.416	0	-1.93	3.37	-10.5	0.62646859	0.32432093	0.11226	0.112489	-8.933517496	-8.97626202	24	6	0	0	0	0	0	1	0	1	0	0	0	1	0	1
AT1G12860.1	447	A	V	NA	NA	NA	NA	ENSVATH04567453	0.0125	1	NA	0.049	0.603	-1.528	6.59	6.74	0.328111918	0.291252975	0.199948	0.200368	-5.995274619	-6.02615569	6	0	0	1	0	1	0	1	0	1	0	1	0	1	0	1
AT1G12920.1	180	G	A	Loss of peptidyl-tRNA hydrolytic activity.	NA	PubMed:15474304	ERF1-2	SWISSPROT	NA	1	1	0	1	-5.495	22.05	10	0.982719817	0.975639615	2.77E-16	2.77E-16	-15.67567227	-15.67567227	42	0	1	1	1	1	1	1	1	1	1	1	1	1	1	1
AT1G13030.1	106	E	K	In ncb-3; Smaller Cajal bodies.	ncb-3	PubMed:16624863	COIL	SWISSPROT	NA	0	1	0.939	0.944	-0.211	2.94	-1.89	0.089781909	0.057878352	1.3714	1.38074	-0.382517377	-0.37405201	9	3	0	0	0	1	0	0	0	1	0	1	0	0	0	0
AT1G13030.1	555	E	K	NA	NA	NA	NA	ENSVATH00021046	0.0125	0	NA	0.295	0.991	-3.22	5.53	6.83	0.718943634	0.607235081	0.104002	0.104092	-6.896380979	-6.908941833	29	2	0	0	0	1	0	1	0	1	0	1	0	1	0	1
AT1G13030.1	125	M	I	NA	NA	NA	NA	ENSVATH00021056	0.0125	0	NA	0.253	0.005	-1.088	3.77	3.81	0.146357593	0.142095504	0.467322	0.469085	-1.03349549	-1.04532968	7	0	0	0	0	0	0	0	0	1	0	1	0	0	0	0
AT1G13030.1	78	S	G	NA	NA	NA	NA	ENSVATH00021058	0.0125	0	NA	0.009	0.904	-2.947	5.91	7.97	0.310918641	0.285263158	0.184955	0.185244	-4.25046697	-4.264261414	10	0	1	1	0	1	0	1	0	1	1	1	0	1	0	0
AT1G13030.1	503	D	N	NA	NA	NA	NA	ENSVATH01044829	0.025	0	NA	0.013	0.997	-4.003	13.85	10	0.90530011	0.882379482	0.0403471	0.0403752	-10.46377751	-10.47784931	33	0	1	1	1	1	0	1	1	1	1	1	1	1	0	1
AT1G13030.1	227	P	T	NA	NA	NA	NA	ENSVATH01044839	0.0625	0	NA	0.702	0.245	0.392	2.49	-10.3	0.123796452	0.132414109	2.8311	2.86296	-2.438382304	-2.413065174	7	0	0	0	0	1	0	0	0	0	0	0	0	0	0	0
AT1G13030.1	538	K	E	NA	NA	NA	NA	ENSVATH04568208	0.0125	0	NA	0.647	0.066	-0.579	4.61	6.42	0.269830831	0.273179833	0.730356	0.732576	-0.404832379	-0.410862809	20	0	0	0	0	1	0	0	0	1	0	1	0	0	0	0
AT1G13030.1	505	R	H	NA	NA	NA	NA	ENSVATH04568209	0.0125	0	NA	0	0.001	-4.542	7.32	6.855	0.78421419	0.731286237	0.111791	0.111901	-5.557677044	-5.569441231	36	1	1	1	0	0	1	1	0	1	0	1	0	1	0	1
AT1G13030.1	460	T	I	NA	NA	NA	NA	ENSVATH04568212	0.0125	0	NA	1	0.64	0.05	1.88	3.2	0.032955443	0.031710642	0.486485	0.487345	-1.013311999	-1.020402918	7	13	0	0	0	1	0	0	0	0	0	1	0	0	0	0
AT1G13030.1	417	T	I	NA	NA	NA	NA	ENSVATH04568215	0.025	0	NA	0.011	0.771	-3.996	5.29	6.6	0.266684132	0.208190729	0.686695	0.689122	-0.409612975	-0.415990091	23	2	1	1	0	1	0	1	0	1	0	1	0	0	0	0
AT1G13030.1	266	A	V	NA	NA	NA	NA	ENSVATH04568221	0.025	0	NA	0.458	0.376	-3.634	6.38	7.65	0.584948362	0.562300446	0.20203	0.202256	-4.084034842	-4.094336316	26	0	0	0	0	1	0	1	0	1	0	1	0	1	0	1
AT1G13030.1	247	C	Y	NA	NA	NA	NA	ENSVATH04568224	0.025	0	NA	0.038	0.924	-2.21	3.39	-5.88	0.144621025	0.133326212	2.66592	2.69222	-2.319118109	-2.293524603	11	1	0	1	0	1	0	1	0	1	0	0	0	0	0	0
AT1G13030.1	246	L	P	NA	NA	NA	NA	ENSVATH04568225	0.0125	0	NA	0.275	0.993	-1.033	6	-4.3	0.112454012	0.117700595	1.80971	1.81934	-0.931639713	-0.921811527	7	0	0	0	1	1	0	0	0	1	0	0	0	0	0	0
AT1G13030.1	227	P	H	NA	NA	NA	NA	ENSVATH04568227	0.0125	0	NA	0.15	0.981	-1.569	2	-5.15	0.11100409	0.102030748	2.8311	2.86296	-2.438382304	-2.413065174	7	1	0	1	0	1	0	1	0	0	0	0	0	0	0	0
AT1G13030.1	196	V	A	NA	NA	NA	NA	ENSVATH04568228	0.05	0	NA	0.75	0.066	0.377	4.67	-0.167	0.110251132	0.112343854	0.978068	0.982822	-0.01415919	-0.018259745	7	0	0	0	0	1	0	0	0	1	0	1	0	0	0	0
AT1G13030.1	159	K	E	NA	NA	NA	NA	ENSVATH04568229	0.0125	0	NA	1	0.944	-1.013	4.29	4.97	0.220367283	0.219253349	0.604046	0.605537	-0.751399055	-0.758485894	15	0	0	0	0	1	0	0	0	1	0	1	0	0	0	0
AT1G13030.1	82	K	T	NA	NA	NA	NA	ENSVATH04568232	0.025	0	NA	0.028	0.393	-5.488	14.42	7.87	0.743766983	0.704459025	0.0603946	0.0604534	-8.011876889	-8.024823784	24	0	1	1	0	1	1	1	1	1	0	1	0	1	0	1
AT1G13030.1	54	S	N	NA	NA	NA	NA	ENSVATH04568238	0.0125	0	NA	1	0	0.961	1.3	-0.474	0.050581154	0.032707386	1.34382	1.35552	-0.356709227	-0.345382647	4	5	0	0	0	0	0	0	0	0	0	1	0	0	0	0
AT1G13030.1	53	F	L	NA	NA	NA	NA	ENSVATH04568239	0.025	0	NA	0	0.904	-5.835	9.86	7.85	0.865936322	0.839823387	0.0538352	0.0537814	-9.382366408	-9.346814413	31	0	1	1	0	1	1	1	0	1	0	1	0	1	0	1
AT1G13030.1	35	N	Y	NA	NA	NA	NA	ENSVATH04568241	0.0125	0	NA	0.058	0.887	-1.888	4.49	1.98	0.167275236	0.159820182	0.386638	0.387465	-1.698013439	-1.708271607	7	0	0	1	0	1	0	1	0	1	0	1	0	0	0	0
AT1G13450.1	118	Q	P	Abolishes DNA-binding activity.	NA	PubMed:7866025	GT-1	SWISSPROT	NA	1	1	0.218	0.936	-4.98	15.22	6.81	0.694962296	0.660800363	0.147023	0.14709	-6.623589128	-6.631298548	25	0	0	0	0	1	1	1	1	1	0	1	0	1	0	1
AT1G13450.1	143	L	P	Abolishes DNA-binding activity.	NA	PubMed:7866025	GT-1	SWISSPROT	NA	1	1	NA	1	-6.599	10.08	2.75	0.881512302	0.862163064	0.0722014	0.0722296	-7.953516538	-7.958607311	37	0	NA	NA	1	1	1	1	0	1	0	1	0	1	0	1
AT1G13450.1	133	T	A	Decreases DNA-binding activity 2-fold.	NA	PubMed:10437822, PubMed:20717979	GT-1	SWISSPROT	NA	1	1	0.136	0.044	-4.219	11.01	9.32	0.960952532	0.948109476	0.0177693	0.0177752	-13.14712188	-13.15462844	38	0	0	1	0	1	0	1	0	1	1	1	1	1	1	1
AT1G13450.1	198	S	D	Decreases DNA-binding activity 8-fold.	NA	PubMed:10437822	GT-1	SWISSPROT	NA	1	1	NA	0.933	-2.896	38.11	7.675	0.903012355	0.883127487	0.0563035	0.0563236	-9.329054921	-9.336465759	36	0	NA	NA	0	1	0	1	1	1	0	1	1	1	0	1
AT1G13450.1	89	Q	P	Decreases strongly DNA-binding activity.	NA	PubMed:7866025	GT-1	SWISSPROT	NA	1	1	0.017	1	-5.496	32.7	8.26	0.901841263	0.877824329	0.0582864	0.0583099	-10.64573401	-10.65392491	32	0	1	1	1	1	1	1	1	1	1	1	1	1	0	1
AT1G13450.1	133	T	D	Increases DNA-binding activity 3-fold.	NA	PubMed:10437822, PubMed:20717979	GT-1	SWISSPROT	NA	1	1	NA	0.962	-5.321	7.1	8.69	0.960952532	0.948109476	0.0177693	0.0177752	-13.14712188	-13.15462844	38	0	NA	NA	0	1	1	1	0	1	1	1	1	1	1	1
AT1G13450.1	381	S	C	NA	NA	NA	NA	ENSVATH00021881	1	1	NA	0.18	0	3.582	1.26	1.085	0.018324123	0.285233853	0.265685	0.227366	-3.827014894	-3.18219078	2	19	0	0	0	0	0	0	0	0	0	1	0	0	0	0
AT1G13450.1	375	A	G	NA	NA	NA	NA	ENSVATH01047085	0.1	1	NA	0.129	0.001	-1.387	2.43	1.14	0.213496895	0.189251283	0.783909	0.785466	-0.283299005	-0.286674134	18	1	0	1	0	0	0	1	0	0	0	1	0	0	0	0
AT1G13450.1	372	E	D	NA	NA	NA	NA	ENSVATH01047086	0.1125	1	0	1	0	1.919	0.79	-9.22	0.01475877	0.122826854	0.226502	0.199409	-5.599266924	-4.903997742	9	28	0	0	0	0	0	0	0	0	0	0	0	0	0	0
AT1G13450.1	24	S	C	NA	NA	NA	NA	ENSVATH04570826	0.05	1	NA	0.075	0.6	-0.952	NA	0	0.084842767	0.082306022	0.220198	0.232395	0	0	1	0	0	1	0	1	0	0	NA	NA	0	1	0	0	0	0
AT1G13980.1	696	M	L	Confers brefeldin A (BFA) resistance.	NA	PubMed:12553910	GN	SWISSPROT	NA	1	1	0.207	0.184	-1.324	7.91	8.77	0.98035797	0.967064781	0.012893	0.0128964	-16	-16	41	1	0	0	0	1	0	1	0	1	1	1	1	1	1	1
AT1G13980.1	951	G	E	Defects in hydrotropic response.	NA	Ref.18	GN	SWISSPROT	NA	1	1	0.01	1	-6.64	35.36	9.39	0.966438453	0.955385559	1.61E-16	1.61E-16	-13.17723518	-13.18307498	40	0	1	1	1	1	1	1	1	1	1	1	1	1	1	1
AT1G13980.1	579	G	R	In B4049; abnormal embryo development.;	b4049	NA	GN	SWISSPROT	NA	1	1	0	1	-7.944	36.52	10	0.976530926	0.968078642	7.84E-19	2.30E-16	-14.21501204	-14.21501204	42	0	1	1	1	1	1	1	1	1	1	1	1	1	1	1
AT1G13980.1	658	E	K	In emb30-1/T391/U87; abnormal embryo development.	emb30-1/t391/u87	PubMed:8020095	GN	SWISSPROT	NA	1	1	0	1	-3.972	19.98	10	0.982040148	0.974794914	4.36E-17	4.36E-17	-15.49208344	-15.49208344	42	0	1	1	1	1	0	1	1	1	1	1	1	1	1	1
AT1G13980.1	84	P	T	NA	NA	NA	NA	ENSVATH00022474	0.0375	1	NA	0.218	0.041	-1.882	3.44	1.71	0.236902736	0.235459084	0.568009	0.569016	-0.813153805	-0.817885063	16	0	0	0	0	1	0	1	0	1	0	1	0	0	0	0
AT1G13980.1	1288	W	L	NA	NA	NA	NA	ENSVATH00022487	0.0125	1	NA	0.08	0.999	-12.545	33.15	8.98	0.973755633	0.963439342	1.12E-16	1.12E-16	-15.05692316	-15.05692316	38	0	0	1	1	1	1	1	1	1	1	1	1	1	1	1
AT1G13980.1	1430	S	T	NA	NA	NA	NA	ENSVATH00022492	0.475	1	0	0.361	0.088	-0.809	6.83	3.8	0.102498083	0.152933548	0.228283	0.194617	-4.010782521	-3.293306962	1	4	0	0	0	1	0	0	0	1	0	1	0	0	0	0
AT1G13980.1	1217	F	Y	NA	NA	NA	NA	ENSVATH01048806	0.475	1	0	0.95	0	0.068	4.63	-3.53	0.076468258	0.118716594	0.290329	0.248809	-3.274018168	-2.660576386	2	6	0	0	0	0	0	0	0	1	0	0	0	0	0	0
AT1G13980.1	1234	F	Y	NA	NA	NA	NA	ENSVATH01048807	0.475	1	0	1	0.007	-0.056	6.48	-5.9	0.116726998	0.119489292	1.01568	1.01965	-0.013736733	-0.010969996	8	0	0	0	0	0	0	0	0	1	0	0	0	0	0	0
AT1G13980.1	144	S	T	NA	NA	NA	NA	ENSVATH04573492	0.0125	1	NA	0.014	0.163	-1.307	9.26	6.11	0.305346804	0.280846084	0.178919	0.179016	-4.131370254	-4.136270997	10	0	1	1	0	1	0	1	0	1	0	1	0	1	0	0
AT1G13980.1	299	P	L	NA	NA	NA	NA	ENSVATH04573500	0.0125	1	NA	0.292	0	-0.267	4.12	5.195	0.168362578	0.164050874	0.486368	0.486917	-1.148033289	-1.151677843	9	0	0	0	0	0	0	0	0	1	0	1	0	0	0	0
AT1G13980.1	367	S	F	NA	NA	NA	NA	ENSVATH04573502	0.0125	1	NA	0.007	0.617	-4.666	7.44	4.749	0.68970833	0.666816317	0.158358	0.158438	-4.799037388	-4.80471765	30	0	1	1	0	1	1	1	0	1	0	1	0	1	0	1
AT1G13980.1	557	R	K	NA	NA	NA	NA	ENSVATH04573503	0.025	1	NA	1	0.175	0.085	1.76	6.59	0.790685293	0.726530537	0.065879	0.0659043	-7.765824514	-7.772661003	30	1	0	0	0	1	0	0	0	0	0	1	0	1	0	1
AT1G13980.1	775	P	S	NA	NA	NA	NA	ENSVATH04573505	0.0875	1	NA	0.028	0.084	-7.106	4.25	7.655	0.880369751	0.859911076	0.0842798	0.0843054	-8.258881499	-8.263723834	36	0	1	1	0	1	1	1	0	1	0	1	0	1	0	1
AT1G13980.1	1213	D	E	NA	NA	NA	NA	ENSVATH04573516	0.0125	1	NA	0.24	0	-1.024	4.49	-19	0.589520648	0.50055279	0.101344	0.101382	-7.412227317	-7.418863057	18	1	0	0	0	0	0	0	0	1	0	0	0	1	0	1
AT1G13980.1	1319	G	S	NA	NA	NA	NA	ENSVATH04573517	0.0125	1	NA	0.292	0.102	-2.421	6.8	9.47	0.907289696	0.887586282	0.0389757	0.0389872	-9.546525556	-9.552761166	36	0	0	0	0	1	0	1	0	1	1	1	1	1	0	1
AT1G13980.1	1336	L	F	NA	NA	NA	NA	ENSVATH04573518	0.025	1	NA	0	0.743	-3.759	12.59	2.5	0.943940366	0.929359336	2.30E-16	2.77E-16	-11.01343158	-11.01895194	39	0	1	1	0	1	0	1	1	1	0	1	1	1	1	1
AT1G13980.1	1436	E	A	NA	NA	NA	NA	ENSVATH04573519	0.0125	1	NA	0.567	0.001	0.308	3.16	-15	0.092996611	0.082585397	1.54323	1.54688	-0.601733525	-0.598198095	6	1	0	0	0	0	0	0	0	1	0	0	0	0	0	0
AT1G14320.1	14	G	S	In sac52-d; suppresses the dwarf phenotype of the acl5 mutant.	sac52-d	PubMed:18694459	RPL10A	SWISSPROT	NA	1	1	0.083	0.293	-0.534	7.67	8.73	0.801709195	0.733219202	0.0312879	0.0312954	-15.05692316	-15.05692316	8	0	0	1	0	1	0	0	0	1	1	1	0	1	0	1
AT1G14320.1	186	Q	H	NA	NA	NA	NA	ENSVATH04575083	0.0125	1	NA	0.024	0.142	-1.423	5.62	-20	0.16813625	0.164232621	0.565769	0.566429	-1.215922167	-1.220446796	9	0	1	1	0	1	0	1	0	1	0	0	0	0	0	0
AT1G14350.1	49	A	V	NA	NA	NA	NA	ENSVATH04575456	0.0125	1	NA	0.045	0.581	-2.863	4.57	9.96	0.55937632	0.534112752	0.153922	0.154069	-4.239116324	-4.248466862	24	0	0	1	0	1	0	1	0	1	1	1	0	1	0	1
AT1G14350.1	232	V	L	NA	NA	NA	NA	ENSVATH04575463	0.0125	1	NA	0.233	0.009	-1.433	3.41	-4.01	0.152767962	0.081382525	0.49578	0.496437	-1.202677743	-1.207982525	14	4	0	0	0	0	0	1	0	1	0	0	0	0	0	0
AT1G14350.1	384	L	F	NA	NA	NA	NA	ENSVATH04575468	0.0125	1	NA	0.043	0.301	-3.674	2.9	-4.59	0.459121855	0.448675604	0.300467	0.300875	-2.156741676	-2.163179199	25	0	0	1	0	1	0	1	0	1	0	0	0	1	0	1
AT1G14350.1	419	S	G	NA	NA	NA	NA	ENSVATH04575471	0.0125	1	NA	0.417	0.025	-1.366	NA	-3.23	0.159309482	0.129151319	2.47094	2.51803	-1.173355155	-1.150358275	17	2	0	0	0	0	0	1	NA	NA	0	0	0	0	0	0
AT1G14350.1	84	E	K	NA	flp-8	http://www.plantcell.org/content/17/10/2754.full	FLP	MANUAL	NA	1	1	0	1	-3.798	19.98	9.96	0.963484341	0.952339041	2.65E-17	2.65E-17	-12.41854872	-12.4299465	41	0	1	1	1	1	0	1	1	1	1	1	1	1	1	1
AT1G14400.1	88	C	S	Stabilization of the ester bond with the ubiquitin.	NA	PubMed:8386169	UBC1	SWISSPROT	NA	1	1	0.001	0.702	-9.057	14.04	10	0.983859296	0.977064892	4.66E-16	4.66E-16	-16	-16	42	0	1	1	0	1	1	1	1	1	1	1	1	1	1	1
AT1G14410.1	183	P	S	In atwhy1.1; reduces binding activity to single-stranded DNA.	atwhy1.1	PubMed:14960277	WHY1	SWISSPROT	NA	1	1	0.093	1	-7.77	17.5	8.39	0.955620974	0.942992877	5.61E-16	5.61E-16	-11.82121292	-11.82432297	40	0	0	1	1	1	1	1	1	1	1	1	1	1	1	1
AT1G14410.1	148	G	E	In atwhy1.2; reduces binding activity to single-stranded DNA.	atwhy1.2	PubMed:14960277	WHY1	SWISSPROT	NA	1	1	0.003	1	-7.911	35.17	8.88	0.920301048	0.904923565	0.0491335	0.0491409	-8.955832725	-8.958330994	40	0	1	1	1	1	1	1	1	1	1	1	1	1	1	1
AT1G14410.1	127	A	D	NA	NA	NA	NA	ENSVATH00023132	0.275	1	0	0.008	0.888	-4.361	34.3	7.79	0.48469739	0.466032487	0.219958	0.220042	-3.252101341	-3.25453249	23	0	1	1	0	1	0	1	1	1	0	1	0	1	0	1
AT1G14410.1	237	A	T	NA	NA	NA	NA	ENSVATH04575696	0.0125	1	NA	0.854	0.701	-2.674	4.29	5.6	0.276200236	0.059466296	0.223712	0.223772	-3.781556405	-3.783952918	26	10	0	0	0	1	0	1	0	1	0	1	0	0	0	0
AT1G14410.1	213	R	Q	NA	NA	NA	NA	ENSVATH04575698	0.0125	1	NA	0.083	0.965	-1.705	4.09	4.13	0.475662187	0.443885057	0.147378	0.147276	-5.096956702	-5.082127045	17	0	0	1	0	1	0	1	0	1	0	1	0	1	0	1
AT1G14410.1	36	G	A	NA	NA	NA	NA	ENSVATH04575709	0.0125	1	NA	1	0.377	-0.159	5.19	-2.69	0.149200516	0.136467279	2.27892	2.28252	-1.751568145	-1.747897321	12	1	0	0	0	1	0	0	0	1	0	0	0	0	0	0
AT1G14410.1	91	K	A	No effect on DNA binding. Affects its function in DNA repair.	NA	PubMed:21911368	WHY1	SWISSPROT	NA	1	1	NA	1	-5.783	18.87	8.92	0.938967713	0.924023329	0.0366897	0.0366952	-10.62883051	-10.63221559	39	0	NA	NA	1	1	1	1	1	1	1	1	1	1	1	1
AT1G14510.1	211	W	M	Abolishes binding to H3K4me2/3.	NA	PubMed:19154204	AL7	SWISSPROT	NA	1	1	NA	1	-10.761	13.08	8.685	0.972601468	0.963054351	0.0428015	0.0428236	-13.84771777	-13.85802375	41	0	NA	NA	1	1	1	1	1	1	1	1	1	1	1	1
AT1G14510.1	215	D	N	Abolishes binding to H3K4me2/3.	NA	PubMed:19154204	AL7	SWISSPROT	NA	1	1	0	0.998	-4.387	13.97	10	0.983859296	0.977064892	2.05E-17	2.05E-17	-16	-16	42	0	1	1	1	1	0	1	1	1	1	1	1	1	1	1
AT1G14510.1	218	E	Q	Does not affect binding to H3K4me2/3.	NA	PubMed:19154204	AL7	SWISSPROT	NA	1	1	0.082	1	-2.61	3.26	9	0.978481419	0.970188829	0.0319949	0.0320102	-15.00516482	-15.00516482	41	0	0	1	1	1	0	1	0	1	1	1	1	1	1	1
AT1G14510.1	153	S	N	NA	NA	NA	NA	ENSVATH04576227	0.0125	1	NA	0.549	0.001	0.02	5.23	4.67	0.780671568	0.748619453	0.128584	0.128685	-7.653674412	-7.666081402	28	0	0	0	0	0	0	0	0	1	0	1	0	1	0	1
AT1G14510.1	151	H	N	NA	NA	NA	NA	ENSVATH04576228	0.0125	1	NA	0.645	0	-0.414	2.67	2.51	0.665709685	0.500199895	0.157538	0.157664	-7.387934912	-7.400831154	26	3	0	0	0	0	0	0	0	0	0	1	0	1	0	1
AT1G14510.1	205	Y	L	Slightly affects binding to H3K4me2/3.	NA	PubMed:19154204	AL7	SWISSPROT	NA	1	1	NA	0.881	-6	19.15	10	0.97442105	0.96493737	0.0183725	0.0183806	-14.50897466	-14.50897466	40	0	NA	NA	0	1	1	1	1	1	1	1	1	1	1	1
AT1G14900.1	98	R	G	Loss of the nuclear accumulation.	NA	PubMed:17114349	HMGA	SWISSPROT	NA	0	1	0.004	0.958	-6.523	12.13	1.45	0.979915347	0.971395015	0.00779098	0.00779104	-16	-16	39	0	1	1	0	1	1	1	1	1	0	1	1	1	1	1
AT1G14900.1	164	R	G	Loss of the nuclear accumulation.	NA	PubMed:17114349	HMGA	SWISSPROT	NA	0	1	0.236	0.663	-2.252	3.56	-2.23	0.196077806	0.180719143	0.281331	0.281729	-3.184708555	-3.203187772	5	0	0	0	0	1	0	1	0	1	0	0	0	0	0	0
AT1G14900.1	64	M	T	NA	NA	NA	NA	ENSVATH00024030	0.825	0	0	0.911	0	1.817	2.31	-14.1	0.021526287	0.048086333	2.62803	1.89816	-0.511149047	-0.911148358	4	11	0	0	0	0	0	0	0	0	0	0	0	0	0	0
AT1G14900.1	175	P	A	NA	NA	NA	NA	ENSVATH04578679	0.0125	0	NA	0.248	0.904	-1.637	3.31	-0.848	0.412304806	0.269323619	0.121647	0.121767	-4.87886711	-4.899981169	19	3	0	0	0	1	0	1	0	1	0	1	0	1	0	0
AT1G14900.1	151	I	V	NA	NA	NA	NA	ENSVATH04578682	0.0125	0	NA	0.479	0	0.49	4.39	-17	0.095012482	0.087881639	0.222634	0.189656	-1.893397789	-1.161503523	1	1	0	0	0	0	0	0	0	1	0	0	0	0	0	0
AT1G14900.1	145	P	S	NA	NA	NA	NA	ENSVATH04578684	0.0125	0	NA	0.333	0.958	-2.425	3.6	-0.7788	0.339565276	0.293628431	0.221622	0.221942	-1.697454791	-1.698956976	21	1	0	0	0	1	0	1	0	1	0	1	0	1	0	1
AT1G14900.1	122	A	V	NA	NA	NA	NA	ENSVATH04578685	0.0125	0	NA	0.145	0.904	-0.495	4.76	6.22	0.493010707	0.388087135	0.0663252	0.0663674	-9.32672182	-9.350974808	7	1	0	1	0	1	0	0	0	1	0	1	0	1	0	1
AT1G14900.1	110	A	V	NA	NA	NA	NA	ENSVATH04578686	0.0125	0	NA	0.339	0.574	0.481	NA	-7.73	0.081178244	0.087198322	2.56739	2.71433	-1.048387612	-0.998011149	4	0	0	0	0	1	0	0	NA	NA	0	0	0	0	0	0
AT1G14900.1	75	K	R	NA	NA	NA	NA	ENSVATH04578691	0.0125	0	NA	0.116	0.606	-2.921	5.36	8.89	0.97253406	0.945831864	0.0065489	0.00655158	-16	-16	38	2	0	1	0	1	0	1	0	1	1	1	1	1	1	1
AT1G14900.1	39	D	E	NA	NA	NA	NA	ENSVATH04578693	0.0125	0	NA	1	0.177	-1.685	2.32	-20	0.767133252	0.170997686	0.065727	0.0657518	-15.67567227	-15.67567227	27	14	0	0	0	1	0	1	0	0	0	0	0	1	0	0
AT1G14900.1	11	S	T	NA	NA	NA	NA	ENSVATH04578694	0.0125	0	NA	0.175	0.008	0.787	NA	-4.2	0.054328199	0.05717144	0.691116	0.673057	-0.196696554	-0.18170283	2	4	0	0	0	0	0	0	NA	NA	0	0	0	0	0	0
AT1G14900.1	4	D	A	NA	NA	NA	NA	ENSVATH04578695	0.0125	0	NA	0.222	0.991	-1.078	4.57	2.72	0.294795916	0.235988164	0.158457	0.158649	-4.433782952	-4.459401521	10	1	0	0	0	1	0	0	0	1	0	1	0	0	0	0
AT1G15100.1	103	E	P	Decreased affinity for ANAC.	NA	PubMed:12646039	RHA2A	SWISSPROT	NA	1	1	NA	0.017	-0.722	2.91	-11.54	0.085668453	0.021850321	0.373207	0.3741	-2.046889578	-2.062487625	9	8	NA	NA	0	0	0	0	0	1	0	0	0	0	0	0
AT1G15100.1	89	C	A	Loss of E3 ubiquitin ligase activity.	NA	PubMed:19286935	RHA2A	SWISSPROT	NA	1	1	NA	0.997	-8.933	11.84	9.53	0.982620297	0.97529153	0.00750595	0.00750831	-16	-16	41	0	NA	NA	1	1	1	1	1	1	1	1	1	1	1	1
AT1G15100.1	138	S	Y	NA	NA	NA	NA	ENSVATH00024321	0.175	1	0	0.152	0.92	-2.114	4.15	-18.75	0.13746706	0.14666518	2.37953	2.41386	-1.533203533	-1.508863918	10	0	0	1	0	1	0	1	0	1	0	0	0	0	0	0
AT1G15100.1	111	K	N	NA	NA	NA	NA	ENSVATH00024322	0.0125	1	NA	0.261	0.001	0.329	1.6	-20	0.083791541	0.083817585	0.808091	0.810967	-0.152643308	-0.157067656	2	0	0	0	0	0	0	0	0	0	0	0	0	0	0	0
AT1G15100.1	82	G	D	NA	NA	NA	NA	ENSVATH01053889	0.1125	1	0	0.438	0.002	-0.312	2.58	-20	0.138451395	0.105685682	1.01096	1.02074	-0.018035143	-0.009533274	14	2	0	0	0	0	0	0	0	0	0	0	0	0	0	0
AT1G15100.1	40	K	N	NA	NA	NA	NA	ENSVATH01053892	0.1125	1	0	0.305	0	0.05	1.95	-19.5	0.030549222	0.027369603	6.22513	6.9659	-0.98655182	-0.849943906	4	2	0	0	0	0	0	0	0	0	0	0	0	0	0	0
AT1G15100.1	148	L	W	NA	NA	NA	NA	ENSVATH04579712	0.0125	1	NA	0.004	0.996	-4.981	4.87	6.54	0.680152553	0.664227217	0.165479	0.165638	-3.558560962	-3.571241761	33	0	1	1	1	1	1	1	0	1	0	1	0	1	0	1
AT1G15100.1	121	N	S	NA	NA	NA	NA	ENSVATH04579714	0.025	1	NA	0.338	0.978	-4.541	2.56	3.05	0.640769408	0.56251007	0.129791	0.129894	-6.372859543	-6.392784173	24	1	0	0	0	1	1	1	0	0	0	1	0	1	0	1
AT1G15100.1	83	G	C	NA	NA	NA	NA	ENSVATH04579715	0.0625	1	NA	0.056	0.625	-3.014	2.69	-1.62	0.242187673	0.251030252	1.08305	1.09347	-0.079596456	-0.07090973	20	0	0	1	0	1	0	1	0	0	0	1	0	0	0	0
AT1G15215.2	191	C	A	Decreased stability of the protein.	NA	PubMed:23636332	SHH1	SWISSPROT	NA	0	1	NA	1	-8.65	31.68	10	0.980031188	0.970823595	2.11E-16	4.36E-17	-15.49208344	-15.67567227	40	0	NA	NA	1	1	1	1	1	1	1	1	1	1	1	1
AT1G15215.2	130	E	A	DNA methylation defects.	NA	PubMed:23636332	SHH1	SWISSPROT	NA	0	1	0	1	-5.933	13.51	8.98	0.954142518	0.940723244	0.0364288	0.0364561	-12.02640392	-12.04333079	39	0	1	1	1	1	1	1	1	1	1	1	1	1	1	1
AT1G15215.2	212	Y	A	DNA methylation defects.	NA	PubMed:23636332	SHH1	SWISSPROT	NA	0	1	NA	1	-8.533	22.3	8.85	0.905094549	0.883247558	0.0644952	0.0645444	-10.13140317	-10.14543225	34	0	NA	NA	1	1	1	1	1	1	1	1	1	1	0	1
AT1G15215.2	140	Y	A	Loss of interaction with H3K9 and DNA methylation defects.	NA	PubMed:23636332, PubMed:23637343	SHH1	SWISSPROT	NA	0	1	NA	0.999	-7.867	21.42	8.915	0.935988585	0.918515128	0.0428262	0.0428582	-11.41943652	-11.43375347	36	0	NA	NA	1	1	1	1	1	1	1	1	1	1	1	1
AT1G15215.2	114	V	F	NA	NA	NA	NA	ENSVATH04580311	0.0125	0	NA	0.034	0.433	-0.953	NA	-0.106	0.092109904	0.098645656	2.19763	2.26006	-0.624495504	-0.600258804	6	0	1	1	0	1	0	0	NA	NA	0	1	0	0	0	0
AT1G15215.2	116	T	A	NA	NA	NA	NA	ENSVATH04580312	0.0125	0	NA	0.777	0.035	-0.069	3.68	-3.25	0.079712935	0.088828141	3.82644	3.85413	-2.818419354	-2.804620706	2	0	0	0	0	0	0	0	0	1	0	0	0	0	0	0
AT1G15215.2	219	N	H	NA	NA	NA	NA	ENSVATH04580320	0.0125	0	NA	0.016	0.995	-1.143	4.89	7.88	0.250649431	0.227490987	0.221281	0.221564	-4.261297907	-4.277575873	6	0	1	1	1	1	0	0	0	1	0	1	0	0	0	0
AT1G15215.2	233	V	M	NA	NA	NA	NA	ENSVATH04580322	0.0125	0	NA	0.106	0.955	-1.286	3.52	-0.631	0.202843886	0.196624645	0.462001	0.462804	-1.499681176	-1.508386208	11	0	0	1	0	1	0	1	0	1	0	1	0	0	0	0
AT1G15215.2	258	E	D	NA	NA	NA	NA	ENSVATH04580323	0.125	0	0	0.087	0.011	-0.725	4.56	-11.2	0.106816627	0.116011318	3.28711	3.34382	-2.803829344	-2.760893305	5	0	0	1	0	0	0	0	0	1	0	0	0	0	0	0
AT1G15215.2	141	D	A	Strong DNA methylation defects.	NA	PubMed:23636332	SHH1	SWISSPROT	NA	0	1	0	1	-7.833	29.51	10	0.981344594	0.973441486	4.36E-17	4.36E-17	-16	-16	40	0	1	1	1	1	1	1	1	1	1	1	1	1	1	1
AT1G15550.1	220	C	Y	In ga4-1; semidwarf and deficient in active gibberellins.	ga4-1	PubMed:7756830	GA3OX1	SWISSPROT	NA	1	1	0.002	1	-10.821	9.54	7.59	0.981221811	0.97331853	0.0325107	0.0325241	-16	-16	40	0	1	1	1	1	1	1	0	1	0	1	1	1	1	1
AT1G15550.1	264	F	V	NA	NA	NA	NA	ENSVATH00025024	0.0625	1	NA	1	0	2.425	1.7	-19.7	0.00830489	0.250615015	0.488253	0.378408	-1.069895431	-0.57110909	1	20	0	0	0	0	0	0	0	0	0	0	0	0	0	0
AT1G15550.1	151	D	N	NA	NA	NA	NA	ENSVATH00025027	0.225	1	0	0.429	0.37	1.521	1.48	1.77	0.360812968	0.293902281	0.165468	0.165603	-4.820956907	-4.837056423	13	1	0	0	0	1	0	0	0	0	0	1	0	1	0	1
AT1G15550.1	85	N	D	NA	NA	NA	NA	ENSVATH00025029	0.0125	1	NA	0.077	0.995	-4.675	4.89	6.21	0.932547526	0.91081121	0.0531822	0.0532079	-12.88348191	-12.90386198	31	0	0	1	1	1	1	1	0	1	0	1	1	1	1	1
AT1G15550.1	68	T	S	NA	NA	NA	NA	ENSVATH00025030	0.05	1	NA	0.776	0	-0.489	2.96	-11.615	0.082699661	0.062748366	0.6208	0.548605	-1.016333127	-0.721040729	3	2	0	0	0	0	0	0	0	1	0	0	0	0	0	0
AT1G15550.1	336	E	D	NA	NA	NA	NA	ENSVATH04581598	0.0375	1	NA	0.086	0.016	-2.752	6.12	4.94	0.981274841	0.973371604	0.018495	0.0185029	-16	-16	40	0	0	1	0	0	0	1	0	1	0	1	1	1	1	1
AT1G15550.1	257	G	S	NA	NA	NA	NA	ENSVATH04581600	0.0125	1	NA	0.05	0.959	-4.838	1.4	-8.29	0.56520678	0.539474691	0.191374	0.191542	-4.381097759	-4.395220089	24	0	0	1	0	1	1	1	0	0	0	0	0	1	0	1
AT1G15550.1	237	L	I	NA	NA	NA	NA	ENSVATH04581601	0.0125	1	NA	0.155	0.779	-1.207	1.93	3.37	0.573387669	0.41579306	0.141386	0.141487	-5.190220164	-5.202860619	27	3	0	1	0	1	0	0	0	0	0	1	0	1	0	1
AT1G15690.1	504	D	N	Abolishes H(+) translocation and strong reduction of PPi hydrolysis, reduced sensitivity to DCCD.	NA	PubMed:9268385	AVP1	SWISSPROT	NA	0	1	0	0.975	-3.921	13.97	10	0.977149571	0.968645052	3.68E-17	3.68E-17	-14.31211804	-14.34285902	42	0	1	1	0	1	0	1	1	1	1	1	1	1	1	1
AT1G15690.1	305	E	Q	Abolishes H(+) translocation and strong reduction of PPi hydrolysis, reduced sensitivity to DCCD.	NA	PubMed:9268385	AVP1	SWISSPROT	NA	0	1	0.163	0.999	-2.437	13.2	10	0.977476323	0.96901202	8.47E-17	2.77E-16	-14.37594181	-14.41175519	42	0	0	0	1	1	0	1	1	1	1	1	1	1	1	1
AT1G15690.1	305	E	D	Abolishes H(+) translocation and strong reduction of PPi hydrolysis.	NA	PubMed:9268385	AVP1	SWISSPROT	NA	0	1	0.359	1	-2.491	13.31	-8.39	0.977476323	0.96901202	8.47E-17	2.77E-16	-14.37594181	-14.41175519	42	0	0	0	1	1	0	1	1	1	0	0	1	1	1	1
AT1G15690.1	504	D	E	Abolishes H(+) translocation and strong reduction of PPi hydrolysis.	NA	PubMed:9268385	AVP1	SWISSPROT	NA	0	1	0	0.975	-3.427	23.98	4.08	0.977149571	0.968645052	3.68E-17	3.68E-17	-14.31211804	-14.34285902	42	0	1	1	0	1	0	1	1	1	0	1	1	1	1	1
AT1G15690.1	427	E	D	Increases H(+) translocation, normal PPi hydrolysis.	NA	PubMed:9268385	AVP1	SWISSPROT	NA	0	1	0.02	0.765	-1.992	13.31	-13.7	0.978322156	0.970136538	2.77E-16	2.77E-16	-14.57617927	-14.59474075	42	0	1	1	0	1	0	1	1	1	0	0	1	1	1	1
AT1G15690.1	573	D	N	Increases H(+) translocation, normal PPi hydrolysis.	NA	PubMed:9268385	AVP1	SWISSPROT	NA	0	1	1	0.024	-1.469	13.97	10	0.976417386	0.967770575	6.50E-17	6.50E-17	-14.1628941	-14.19190589	42	0	0	0	0	0	0	1	1	1	1	1	1	1	1	1
AT1G15690.1	42	D	N	NA	NA	NA	NA	ENSVATH04582686	0.0125	0	NA	0.561	0.001	-0.037	2.1	2.7	0.179691215	0.180675198	0.753917	0.758166	-0.388507173	-0.399704653	13	0	0	0	0	0	0	0	0	0	0	1	0	0	0	0
AT1G15690.1	59	G	D	NA	NA	NA	NA	ENSVATH04582687	0.05	0	NA	0.421	0	-0.282	13.25	-19.4	0.196569268	0.178970587	1.5709	1.59058	-0.935688048	-0.90191724	17	1	0	0	0	0	0	0	1	1	0	0	0	0	0	0
AT1G15690.1	76	A	T	NA	NA	NA	NA	ENSVATH04582689	0.0125	0	NA	0.574	0.001	-0.671	3.87	-5.39	0.176364306	0.119258097	1.45946	1.46987	-0.652151093	-0.638083381	19	3	0	0	0	0	0	0	0	1	0	0	0	0	0	0
AT1G15690.1	634	C	A	Reduced sensitivity to NEM.	NA	PubMed:7852329	AVP1	SWISSPROT	NA	0	1	NA	0.998	-7.121	31.68	10	0.973713618	0.964578088	7.84E-19	7.84E-19	-13.64945157	-13.67151235	42	0	NA	NA	1	1	1	1	1	1	1	1	1	1	1	1
AT1G15690.1	229	E	D	Slight increased PPi hydrolysis and H(+) translocation.	NA	PubMed:9268385	AVP1	SWISSPROT	NA	0	1	0.17	1	-2.636	8.34	-1.5	0.960045955	0.948315206	0.0217361	0.0217652	-11.98728085	-12.01343113	41	0	0	0	1	1	0	1	0	1	0	1	1	1	1	1
AT1G15690.1	119	E	Q	Slight reduction of PPi hydrolysis and H(+) translocation.	NA	PubMed:9268385	AVP1	SWISSPROT	NA	0	1	0.529	0.001	-1.282	3.85	6.92	0.907559519	0.89053724	0.0853206	0.0854426	-8.554375546	-8.579031513	39	0	0	0	0	0	0	1	0	1	0	1	1	1	0	1
AT1G15690.1	229	E	Q	Slight reduction of PPi hydrolysis and H(+) translocation.	NA	PubMed:9268385	AVP1	SWISSPROT	NA	0	1	0.045	1	-2.588	2.97	10	0.960045955	0.948315206	0.0217361	0.0217652	-11.98728085	-12.01343113	41	0	0	1	1	1	0	1	0	1	1	1	1	1	1	1
AT1G15690.1	667	E	Q	Slight reduction of PPi hydrolysis and H(+) translocation.	NA	PubMed:9268385	AVP1	SWISSPROT	NA	0	1	0.351	0.059	-1.195	13.2	10	0.97779041	0.969437077	3.68E-17	2.77E-16	-14.45078945	-14.4789077	42	0	0	0	0	1	0	0	1	1	1	1	1	1	1	1
AT1G15690.1	751	E	Q	Slight reduction of PPi hydrolysis and H(+) translocation.	NA	PubMed:9268385	AVP1	SWISSPROT	NA	0	1	0.007	1	-2.097	2.8	8.09	0.931011209	0.914361506	0.0445706	0.0446335	-10.34592265	-10.37156202	38	0	1	1	1	1	0	1	0	0	1	1	1	1	1	1
AT1G15690.1	427	E	Q	Strong reduction of PPi hydrolysis and H(+) translocation.	NA	PubMed:9268385	AVP1	SWISSPROT	NA	0	1	0.002	0.999	-2.148	13.2	10	0.978322156	0.970136538	2.77E-16	2.77E-16	-14.57617927	-14.59474075	42	0	1	1	1	1	0	1	1	1	1	1	1	1	1	1
AT1G15750.1	176	N	H	In tpl-1; temperature sensitive gain of function; transforms the shoot pole into a second root pole. No effect on the interaction with IAA12 od HAD19, but loss of interaction with AP2.	tpl-1	PubMed:16763149, PubMed:23034631	TPL	SWISSPROT	NA	1	1	0.016	1	-4.635	14.29	5.16	0.959750108	0.94668052	5.61E-16	4.36E-17	-12.98289568	-12.98990367	38	0	1	1	1	1	1	1	1	1	0	1	1	1	1	1
AT1G15750.1	1115	A	T	NA	NA	NA	NA	ENSVATH00025559	0.0125	1	NA	0.663	0	0.224	4.48	-6.76	0.127716214	0.113308622	1.14303	1.14491	-0.158989858	-0.156918036	11	1	0	0	0	0	0	0	0	1	0	0	0	0	0	0
AT1G15750.1	707	G	S	NA	NA	NA	NA	ENSVATH00025568	0.225	1	0	0.785	0.011	-0.025	2.29	4.31	0.403051715	0.346634339	0.275492	0.275679	-3.0199939	-3.024523615	21	1	0	0	0	0	0	0	0	0	0	1	0	1	0	1
AT1G15750.1	628	A	T	NA	NA	NA	NA	ENSVATH00025571	0.9875	1	NA	0.122	0	1.723	2.96	3.18	0.130047598	0.187933317	0.199454	0.167019	-5.293686838	-4.524257646	1	4	0	1	0	0	0	0	0	1	0	1	0	0	0	0
AT1G15750.1	1048	C	Y	NA	NA	NA	NA	ENSVATH04582850	0.0125	1	NA	0	0.233	-9.316	21.23	4.73	0.950372942	0.935934789	2.11E-16	2.11E-16	-11.95860731	-11.96492264	38	0	1	1	0	1	1	1	1	1	0	1	1	1	1	1
AT1G15750.1	992	L	F	NA	NA	NA	NA	ENSVATH04582852	0.0125	1	NA	0.008	0.973	-2.783	9.04	0.799	0.626037296	0.596924757	0.13483	0.134903	-5.174084036	-5.178890822	25	0	1	1	0	1	0	1	0	1	0	1	0	1	0	1
AT1G15750.1	953	K	N	NA	NA	NA	NA	ENSVATH04582854	0.0125	1	NA	0.003	0.331	-4.28	12.66	-2.89	0.827788313	0.803111079	0.0670886	0.0671245	-7.283996656	-7.289398661	33	0	1	1	0	1	0	1	1	1	0	0	0	1	0	1
AT1G15750.1	449	G	D	NA	NA	NA	NA	ENSVATH04582873	0.0125	1	NA	0.04	0.787	-3.887	25.07	-2.16	0.611108182	0.604184002	0.388924	0.389163	-2.368128236	-2.371856388	33	0	0	1	0	1	0	1	1	1	0	1	0	1	0	1
AT1G15750.1	309	P	T	NA	NA	NA	NA	ENSVATH04582877	0.0125	1	NA	0.32	0.001	-3.815	9.42	3.38	0.869976376	0.849179836	0.0428592	0.0428828	-7.773500623	-7.778909319	36	0	0	0	0	0	0	1	0	1	0	1	0	1	0	1
AT1G15750.1	269	A	T	NA	NA	NA	NA	ENSVATH04582884	0.0125	1	NA	0.263	0.001	-0.916	4.35	0.627	0.547130165	0.531328213	0.237531	0.237672	-3.059525851	-3.063901147	27	0	0	0	0	0	0	0	0	1	0	1	0	1	0	1
AT1G16420.1	140	C	A	Loss of protease activity.	NA	PubMed:17998208	AMC8	SWISSPROT	NA	0	1	NA	1	-8.877	31.68	9.99	0.981344594	0.973441486	2.53E-18	7.84E-19	-16	-16	40	0	NA	NA	1	1	1	1	1	1	1	1	1	1	1	1
AT1G16420.1	291	L	S	NA	NA	NA	NA	ENSVATH00026699	0.0375	0	NA	0.73	0.001	1.172	NA	0	0.098717659	0.082222254	0.175874	0.24	0	-0.736906251	1	0	0	0	0	0	0	0	NA	NA	0	1	0	0	0	0
AT1G16420.1	209	E	Q	NA	NA	NA	NA	ENSVATH00026702	0.0125	0	NA	0.47	0.642	-1.03	3.07	4.51	0.289210324	0.281436949	0.324409	0.325246	-1.49400939	-1.503924566	17	0	0	0	0	1	0	0	0	1	0	1	0	0	0	0
AT1G16420.1	373	F	Y	NA	NA	NA	NA	ENSVATH01058644	0.0375	0	NA	0.403	0	2.123	3.17	7.91	0.328046536	0.556893164	0.0665682	0.0522964	-12.90813265	-11.66240298	1	7	0	0	0	0	0	0	0	1	0	1	0	1	0	1
AT1G16420.1	288	A	G	NA	NA	NA	NA	ENSVATH01058648	0.0375	0	NA	0.529	0.009	2.932	2.26	4.11	0.123553158	0.066263046	0.650762	0.651381	-0.551132975	-0.550651214	13	4	0	0	0	0	0	0	0	0	0	1	0	0	0	0
AT1G16420.1	68	N	S	NA	NA	NA	NA	ENSVATH01058660	0.3875	0	0	0.736	0.009	-1.678	6.03	1.45	0.106523045	0.112648698	0.902668	0.794315	-0.280708498	-0.109843998	6	0	0	0	0	0	0	1	0	1	0	1	0	0	0	0
AT1G16420.1	67	D	E	NA	NA	NA	NA	ENSVATH01058661	0.45	0	0	1	0	0.461	4.53	-14.1	0.058949689	0.067084737	0.96416	0.746169	-0.388169459	-0.037851894	1	2	0	0	0	0	0	0	0	1	0	0	0	0	0	0
AT1G16420.1	67	D	N	NA	NA	NA	NA	ENSVATH01058662	0.35	0	0	0.476	0	0.588	2.03	-10.4	0.05245702	0.071946982	0.96416	0.746169	-0.388169459	-0.037851894	1	3	0	0	0	0	0	0	0	0	0	0	0	0	0	0
AT1G16420.1	64	D	E	NA	NA	NA	NA	ENSVATH01058663	0.325	0	0	0.242	0.005	1.204	3.86	-20	0.077989706	0.058276552	1.2959	1.30129	-0.389870255	-0.383084638	5	2	0	0	0	0	0	0	0	1	0	0	0	0	0	0
AT1G16420.1	284	G	S	NA	NA	NA	NA	ENSVATH04585729	0.0125	0	NA	0.818	0.037	-0.833	3	8.91	0.11359699	0.108557755	0.426744	0.426591	-1.360335248	-1.367801945	2	0	0	0	0	0	0	0	0	1	1	1	0	0	0	0
AT1G16420.1	256	T	S	NA	NA	NA	NA	ENSVATH04585732	0.05	0	NA	0.625	0.949	-2.885	3.8	8.985	0.970097592	0.959312853	0.0262581	0.0262667	-14.09785672	-14.11010806	39	0	0	0	0	1	0	1	0	1	1	1	1	1	1	1
AT1G16420.1	244	G	R	NA	NA	NA	NA	ENSVATH04585733	0.025	0	NA	0.002	0.999	-7.769	36.52	10	0.982646636	0.975317914	1.12E-16	1.12E-16	-16	-16	41	0	1	1	1	1	1	1	1	1	1	1	1	1	1	1
AT1G16420.1	217	L	S	NA	NA	NA	NA	ENSVATH04585734	0.1	0	NA	0.46	0.039	-1.466	2.11	-8.385	0.112156683	0.092303034	3.55239	3.59471	-2.386265973	-2.360752638	11	2	0	0	0	1	0	1	0	0	0	0	0	0	0	0
AT1G16420.1	199	K	R	NA	NA	NA	NA	ENSVATH04585735	0.0125	0	NA	0.53	0.031	0.305	4.07	4.4	0.09163808	0.099450523	2.75788	2.80575	-1.485006229	-1.456833742	5	0	0	0	0	0	0	0	0	1	0	1	0	0	0	0
AT1G16420.1	182	S	T	NA	NA	NA	NA	ENSVATH04585737	0.0125	0	NA	0.29	0.039	-1.232	2.97	4	0.536776471	0.418185644	0.176744	0.175697	-5.693099118	-5.687975054	22	2	0	0	0	1	0	0	0	1	0	1	0	1	0	1
AT1G16420.1	68	N	K	NA	NA	NA	NA	ENSVATH04585742	0.4	0	0	0.97	0	-1.422	1.37	-9.39	0.047801329	0.02277049	0.902668	0.794315	-0.280708498	-0.109843998	6	7	0	0	0	0	0	1	0	0	0	0	0	0	0	0
AT1G16420.1	54	C	F	NA	NA	NA	NA	ENSVATH04585743	0.0125	0	NA	0.645	0	2.06	4.69	0.205	0.177089931	0.137075746	0.236556	0.236918	-4.160741984	-4.185811025	2	1	0	0	0	0	0	0	0	1	0	1	0	0	0	0
AT1G16540.1	469	G	E	In aba3-1; induces a reduced ABA biosynthesis.	aba3-1	http://onlinelibrary.wiley.com/doi/10.1111/j.1365-313X.2010.04220.x/full	ABA3	BOTH	NA	0	1	0	1	-7.889	35.36	8.91	0.932501999	0.916915713	1.61E-16	7.84E-19	-10.09044023	-10.09389294	39	0	1	1	1	1	1	1	1	1	1	1	1	1	1	1
AT1G16540.1	106	G	E	In los5-1; induces a deficience in stress-induced ABA accumulation.	los5-1	http://onlinelibrary.wiley.com/doi/10.1111/j.1365-313X.2010.04220.x/full	ABA3	BOTH	NA	0	1	0	1	-7.225	35.36	6.37	0.890758386	0.870235424	4.44E-16	8.87E-17	-8.659058397	-8.662241309	36	0	1	1	1	1	1	1	1	1	0	1	0	1	0	1
AT1G16540.1	430	C	A	Induces a strong reduction in enzyme activity.	NA	PubMed:15561708	ABA3	SWISSPROT	NA	0	1	NA	1	-8.278	31.68	6.64	0.915124481	0.895819475	1.61E-16	3.68E-17	-9.964641916	-9.968264019	36	0	NA	NA	1	1	1	1	1	1	0	1	1	1	0	1
AT1G16540.1	271	K	S	Loss of function.	NA	PubMed:15561708	ABA3	SWISSPROT	NA	0	1	NA	1	-4.97	23	6.77	0.936247725	0.920961259	4.36E-17	4.36E-17	-10.37574679	-10.37954433	39	0	NA	NA	1	1	1	1	1	1	0	1	1	1	1	1
AT1G16540.1	81	I	V	NA	NA	NA	NA	ENSVATH00026978	0.05	0	NA	1	0.013	0.012	1.58	0.923	0.015796115	0.041442621	0.273679	0.273839	-2.613540274	-2.616717959	10	24	0	0	0	0	0	0	0	0	0	1	0	0	0	0
AT1G16540.1	102	L	I	NA	NA	NA	NA	ENSVATH00026979	1	0	NA	1	0	1.565	0.19	4.18	0.006927235	0.781823567	0.0745118	0.0365847	-8.130134315	-6.828624633	1	33	0	0	0	0	0	0	0	0	0	1	0	0	0	1
AT1G16540.1	150	A	G	NA	NA	NA	NA	ENSVATH00026981	1	0	NA	0.233	0.97	-3.617	10.7	3.5	0.703748186	0.681841482	0.135663	0.135714	-4.746056537	-4.749143483	31	0	0	0	0	1	0	1	0	1	0	1	0	1	0	1
AT1G16540.1	377	C	S	NA	NA	NA	NA	ENSVATH00026993	0.025	0	NA	0.016	0.909	-9.342	14.04	7.12	0.944147863	0.930241154	1.61E-16	2.30E-16	-10.68942351	-10.6928828	40	0	1	1	0	1	1	1	1	1	0	1	1	1	1	1
AT1G16540.1	373	G	R	NA	NA	NA	NA	ENSVATH01059510	0.2	0	0	0.022	1	-7.033	7.45	5.24	0.518495436	0.465297356	0.329853	0.330019	-2.500920805	-2.503521478	29	1	1	1	1	1	1	1	0	1	0	1	0	1	0	1
AT1G16540.1	398	F	L	NA	NA	NA	NA	ENSVATH01059515	0.2	0	0	0	1	-5.705	12.82	7.09	0.945374144	0.930963628	2.77E-16	2.77E-16	-11.14314972	-11.14717064	39	0	1	1	1	1	1	1	1	1	0	1	1	1	1	1
AT1G16540.1	471	V	I	NA	NA	NA	NA	ENSVATH01059522	0.05	0	NA	0.195	0.568	-0.829	6.7	5.87	0.805742443	0.717671611	0.0457269	0.0457419	-6.698546773	-6.70155959	36	2	0	0	0	1	0	0	0	1	0	1	0	1	0	1
AT1G16540.1	511	R	K	NA	NA	NA	NA	ENSVATH01059525	0.0125	0	NA	0.972	0.004	-0.325	0.95	-2.83	0.082301962	0.031670522	0.870555	0.871514	-0.145939419	-0.147359615	12	6	0	0	0	0	0	0	0	0	0	0	0	0	0	0
AT1G16540.1	740	K	N	NA	NA	NA	NA	ENSVATH01059541	0.0125	0	NA	0.481	0.001	-1.849	3.47	-2.54	0.15969613	0.148164199	0.896374	0.761948	-0.29996121	-0.105806377	14	1	0	0	0	0	0	1	0	1	0	0	0	0	0	0
AT1G16540.1	227	T	I	NA	NA	NA	NA	ENSVATH04586394	0.0125	0	NA	0.287	0.212	-2.171	3.73	-4.76	0.082398994	0.061507148	1.1603	1.1615	-0.189211189	-0.187815533	6	2	0	0	0	1	0	1	0	1	0	0	0	0	0	0
AT1G16540.1	336	R	C	NA	NA	NA	NA	ENSVATH04586406	0.0125	0	NA	0.002	0.143	-5.172	7.65	5.27	0.31614217	0.249022841	0.633498	0.633855	-0.79605377	-0.797767867	25	2	1	1	0	1	1	1	0	1	0	1	0	1	0	0
AT1G16540.1	619	N	S	NA	NA	NA	NA	ENSVATH04586427	0.0125	0	NA	0.781	0	-0.113	2.2	-18.2	0.019188962	0.09339328	1.4056	1.22929	-0.246631461	-0.454040077	2	12	0	0	0	0	0	0	0	0	0	0	0	0	0	0
AT1G16540.1	627	N	Y	NA	NA	NA	NA	ENSVATH04586428	0.0625	0	NA	0.051	0.014	-0.063	9.01	4.25	0.254832802	0.234808012	0.215003	0.215104	-3.682674339	-3.686229769	8	0	0	1	0	0	0	0	0	1	0	1	0	0	0	0
AT1G16540.1	709	D	H	NA	NA	NA	NA	ENSVATH04586429	0.0125	0	NA	0.145	0	-1.271	2.77	0.215	0.119502729	0.125020934	1.75973	1.76365	-0.85466683	-0.850824011	8	0	0	1	0	0	0	0	0	0	0	1	0	0	0	0
AT1G16540.1	719	P	S	NA	NA	NA	NA	ENSVATH04586430	0.0125	0	NA	0.786	0.087	-3.265	2.64	3.615	0.323634439	0.27753125	0.342953	0.343114	-2.165761191	-2.168388705	19	1	0	0	0	1	0	1	0	0	0	1	0	1	0	0
AT1G16540.1	739	W	L	NA	NA	NA	NA	ENSVATH04586431	0.025	0	NA	0.098	0.972	-11.637	33.15	9.25	0.954258004	0.940390782	7.84E-19	7.84E-19	-12.36220217	-12.36509771	38	0	0	1	0	1	1	1	1	1	1	1	1	1	1	1
AT1G16540.1	805	Q	E	NA	NA	NA	NA	ENSVATH04586433	0.0125	0	NA	1	0	0.92	2.65	4.83	0.037706303	0.050035286	0.459276	0.459602	-1.178072026	-1.180381056	5	11	0	0	0	0	0	0	0	0	0	1	0	0	0	0
AT1G16540.1	723	R	K	NA	NA	http://onlinelibrary.wiley.com/doi/10.1111/j.1365-313X.2010.04220.x/full	ABA3	MANUAL	NA	0	1	0	1	-2.681	6.07	9.25	0.931349205	0.914924913	2.11E-16	1.53E-16	-10.3496235	-10.35337281	38	0	1	1	1	1	0	1	0	1	1	1	1	1	1	1
AT1G18040.1	23	Y	F	Abolishes phosphorylation by WEE1.	NA	PubMed:16856985	CDKD-3	SWISSPROT	NA	1	1	0.749	0.565	-0.864	22.82	10	0.978912699	0.970821282	3.68E-17	1.14E-16	-14.70171909	-14.72668383	42	0	0	0	0	1	0	0	1	1	1	1	1	1	1	1
AT1G18040.1	308	V	I	NA	NA	NA	NA	ENSVATH01066201	0.0625	1	NA	0.474	0.001	-0.335	2.04	-0.246	0.112116973	0.112425483	0.78217	0.783316	-0.260540793	-0.262641148	6	0	0	0	0	0	0	0	0	0	0	1	0	0	0	0
AT1G18040.1	252	P	L	NA	NA	NA	NA	ENSVATH01066203	0.0125	1	NA	0.129	0.102	-3.713	6.67	4.63	0.591098999	0.575521747	0.236684	0.236822	-3.208787408	-3.213049217	29	0	0	1	0	1	0	1	0	1	0	1	0	1	0	1
AT1G18040.1	188	G	S	NA	NA	NA	NA	ENSVATH04594913	0.0125	1	NA	0.341	0.995	-4.613	2.91	8.82	0.850381493	0.703280144	0.0714113	0.0714339	-8.660504813	-8.665429628	38	4	0	0	1	1	1	1	0	1	1	1	0	1	0	1
AT1G18040.1	41	K	R	Prevents autophosphorylation.	NA	PubMed:15486101	CDKD-3	SWISSPROT	NA	1	1	0.004	1	-2.824	7.31	10	0.982719817	0.975639615	3.68E-17	7.84E-19	-15.67567227	-15.67567227	42	0	1	1	1	1	0	1	0	1	1	1	1	1	1	1
AT1G18150.1	133	K	M	Abolishes CAM4-dependent activity.	NA	PubMed:21419340	MPK8	SWISSPROT	NA	1	1	0	1	-5.666	17.24	10	0.983859296	0.977064892	7.84E-19	2.00E-17	-16	-16	42	0	1	1	1	1	1	1	1	1	1	1	1	1	1	1
AT1G18150.1	134	K	R	Abolishes CAM4-dependent activity.	NA	PubMed:21419340	MPK8	SWISSPROT	NA	1	1	0	1	-2.833	4.03	8.93	0.967337675	0.948495405	0.0131953	0.0131997	-13.54992649	-13.56031212	41	1	1	1	1	1	0	1	0	1	1	1	1	1	1	1
AT1G18150.1	568	A	T	NA	NA	NA	NA	ENSVATH04595408	0.0125	1	NA	0.83	0.005	-0.547	4.17	-3.09	0.147171124	0.122580437	0.421876	0.422665	-1.258745948	-1.265250561	8	1	0	0	0	0	0	0	0	1	0	0	0	0	0	0
AT1G18150.1	385	S	L	NA	NA	NA	NA	ENSVATH04595412	0.0125	1	NA	0.001	0.648	-3.819	20.15	-0.225	0.281382745	0.279777346	0.476387	0.477551	-0.777606119	-0.781682484	19	0	1	1	0	1	0	1	1	1	0	1	0	0	0	0
AT1G18150.1	55	A	P	NA	NA	NA	NA	ENSVATH04595421	0.025	1	NA	0.259	0	0.058	5.09	-0.388	0.062000582	0.085781551	8.72519	7.49421	-5.01205859	-5.905563812	3	0	0	0	0	0	0	0	0	1	0	1	0	0	0	0
AT1G18150.1	37	Q	K	NA	NA	NA	NA	ENSVATH04595422	0.0125	1	NA	1	0	0.188	NA	-6.42	0.043867994	0.058765495	10	10	-6.342491913	-6.001868004	3	1	0	0	0	0	0	0	NA	NA	0	0	0	0	0	0
AT1G18350.1	74	K	R	Abolishes kinase activity.	NA	PubMed:16377756	MKK7	SWISSPROT	NA	1	1	0	0.999	-2.861	7.31	9.62	0.981344594	0.973441486	2.05E-17	2.05E-17	-16	-16	40	0	1	1	1	1	0	1	0	1	1	1	1	1	1	1
AT1G18350.1	42	A	V	NA	NA	NA	NA	ENSVATH04596269	0.0125	1	NA	0.536	0.002	-0.264	3.8	-6.46	0.260364989	0.254638048	0.48571	0.48942	-1.296886676	-1.326245746	16	0	0	0	0	0	0	0	0	1	0	0	0	0	0	0
AT1G18350.1	156	L	I	NA	NA	NA	NA	ENSVATH04596274	0.025	1	NA	0	0.999	-1.844	15.46	-0.185	0.983859296	0.977064892	2.30E-16	2.30E-16	-16	-16	42	0	1	1	1	1	0	1	1	1	0	1	1	1	1	1
AT1G18350.1	250	R	K	NA	NA	NA	NA	ENSVATH04596276	0.0125	1	NA	1	0.01	-1.409	1.72	3.81	0.939828336	0.883611368	0.045612	0.0456647	-16	-16	27	2	0	0	0	0	0	1	0	0	0	1	1	1	0	1
AT1G18350.1	304	R	H	NA	NA	NA	NA	ENSVATH04596279	0.0125	1	NA	0.121	0.739	0.162	2.5	-6.7	0.350210244	0.317048915	0.232701	0.233531	-5.081283098	-5.140968037	10	0	0	1	0	1	0	0	0	0	0	0	0	1	0	1
AT1G18890.1	92	K	M	Loss of function.	NA	PubMed:8943201	CPK10	SWISSPROT	NA	1	1	NA	1	-5.464	17.24	9.87	0.982646636	0.975317914	5.32E-17	5.32E-17	-16	-16	41	0	NA	NA	1	1	1	1	1	1	1	1	1	1	1	1
AT1G18890.1	24	P	H	NA	NA	NA	NA	ENSVATH01069073	0.075	1	NA	0.058	0.284	-0.417	1.93	-19.7	0.127484654	0.11321791	1.16619	1.17084	-0.174116459	-0.169457522	11	1	0	1	0	1	0	0	0	0	0	0	0	0	0	0
AT1G18890.1	24	P	T	NA	NA	NA	NA	ENSVATH01069074	0.25	1	0	0.096	0	-0.315	2.52	-16	0.091614288	0.050043252	1.16619	1.17084	-0.174116459	-0.169457522	11	4	0	1	0	0	0	0	0	0	0	0	0	0	0	0
AT1G18890.1	19	S	P	NA	NA	NA	NA	ENSVATH01069076	0.4	1	0	0.383	0	-0.669	2.33	-19.5	0.016042949	0.115542101	2.68588	2.32727	-1.545783416	-1.988036459	2	14	0	0	0	0	0	0	0	0	0	0	0	0	0	0
AT1G18890.1	539	T	S	NA	NA	NA	NA	ENSVATH04599381	0.0125	1	NA	0.296	0.053	0.076	NA	1.9265	0.735652258	0.622735704	0.089188	0.0892385	-7.623844767	-7.63306926	28	2	0	0	0	1	0	0	NA	NA	0	1	0	1	0	1
AT1G18890.1	275	I	T	NA	NA	NA	NA	ENSVATH04599393	0.0125	1	NA	0.001	1	-4.535	17.15	10	0.981372091	0.973736257	0.0136044	0.0136086	-15.67567227	-15.67567227	41	0	1	1	1	1	1	1	1	1	1	1	1	1	1	1
AT1G18890.1	175	V	A	NA	NA	NA	NA	ENSVATH04599400	0.025	1	NA	0.094	0.986	-3.541	27.75	10	0.982040148	0.974794914	4.36E-17	4.36E-17	-15.49208344	-15.49208344	42	0	0	1	0	1	0	1	1	1	1	1	1	1	1	1
AT1G18890.1	112	V	L	NA	NA	NA	NA	ENSVATH04599403	0.025	1	NA	0.024	1	-2.662	20.81	9.87	0.978849936	0.970606059	1.61E-16	2.11E-16	-15.05692316	-15.05692316	41	0	1	1	1	1	0	1	1	1	1	1	1	1	1	1
AT1G18890.1	34	A	S	NA	NA	NA	NA	ENSVATH04599411	0.0125	1	NA	0.525	0.002	0.261	1	-6.26	0.032469769	0.01102946	0.45393	0.454499	-1.499701762	-1.505867678	12	17	0	0	0	0	0	0	0	0	0	0	0	0	0	0
AT1G19180.1	205	R	A	Loss of binding to COI1 but no effect on MYC2 binding.;	NA	NA	TIFY10A	SWISSPROT	NA	1	1	NA	0.992	-5.766	25.85	9.455	0.982646636	0.975317914	7.84E-19	7.84E-19	-16	-16	41	0	NA	NA	0	1	1	1	1	1	1	1	1	1	1	1
AT1G19180.1	206	R	A	Loss of binding to COI1but no effect on MYC2 binding.	NA	NA	TIFY10A	SWISSPROT	NA	1	1	NA	0.992	-4.922	21.24	5.68	0.925835443	0.868300197	0.0597769	0.0623455	-13.35700357	-14.8439751	24	0	NA	NA	0	1	1	1	1	1	0	1	1	1	0	1
AT1G19180.1	51	P	A	NA	NA	NA	NA	ENSVATH00031844	0.0125	1	NA	1	0.283	-0.77	2.12	-17.7	0.034812553	0.019925647	1.14423	1.16391	-0.212664944	-0.184973771	7	10	0	0	0	1	0	0	0	0	0	0	0	0	0	0
AT1G19180.1	172	I	N	NA	NA	NA	NA	ENSVATH04601082	0.0125	1	NA	0.361	0.781	-1.913	3.87	4.31	0.214926493	0.185538707	0.308216	0.427396	-1.490723533	-2.046876999	10	0	0	0	0	1	0	1	0	1	0	1	0	0	0	0
AT1G19350.1	233	P	L	In bes1-101/bes1-D; insensitive to brassinazole; increased stability of the protein but no effect on its phosphorylation.	bes1-101/bes1-d	NA	BZR2	SWISSPROT	NA	1	1	0.016	0.831	-7.871	26.92	10	0.982646636	0.975317914	3.68E-17	3.68E-17	-16	-16	41	0	1	1	0	1	1	1	1	1	1	1	1	1	1	1
AT1G19350.1	92	P	S	NA	NA	NA	NA	ENSVATH04602207	0.0125	1	NA	0.018	0.999	-6.654	5.46	8.24	0.944186784	0.928928226	0.0326336	0.032649	-11.39902493	-11.4165711	38	0	1	1	1	1	1	1	0	1	1	1	1	1	1	1
AT1G19350.1	204	A	T	NA	NA	NA	NA	ENSVATH04602208	0.0125	1	NA	0.347	0.78	-0.568	6.51	7.23	0.853834565	0.821602689	0.0233984	0.0234104	-9.86292105	-9.881024381	28	0	0	0	0	1	0	0	0	1	0	1	0	1	0	1
AT1G19350.1	214	P	R	NA	NA	NA	NA	ENSVATH04602209	0.0125	1	NA	0.003	1	-7.533	32.41	8.13	0.942975317	0.926901489	0.0221284	0.0221388	-11.62678263	-11.644514	37	0	1	1	1	1	1	1	1	1	1	1	1	1	1	1
AT1G19350.1	289	T	S	NA	NA	NA	NA	ENSVATH04602211	0.0125	1	NA	0.849	0.044	0.656	2.15	-0.5205	0.072780171	0.032831718	0.936226	0.947703	-0.034792653	-0.043064066	9	5	0	0	0	1	0	0	0	0	0	1	0	0	0	0
AT1G19570.1	96	A	V	NA	NA	NA	NA	ENSVATH04603712	0.0125	1	NA	0.078	0.189	-3.525	8.79	7.6	0.810293453	0.78653566	0.129653	0.129976	-6.403108344	-6.452923433	34	0	0	1	0	1	0	1	0	1	0	1	0	1	0	1
AT1G19570.1	64	K	N	NA	NA	NA	NA	ENSVATH04603713	0.0125	1	NA	0.317	0.048	-3.299	4.26	-17.6	0.849805653	0.605904209	0.0757923	0.0759362	-11.46511124	-11.52601989	33	6	0	0	0	1	0	1	0	1	0	0	0	1	0	1
AT1G19570.1	20	C	S	No activity.	NA	PubMed:12077129	DHAR1	SWISSPROT	NA	1	1	0.034	0.999	-8.453	3.1	9.195	0.977322163	0.961936867	0.0103007	0.0103149	-16	-16	39	1	1	1	1	1	1	1	0	1	1	1	1	1	1	1
AT1G19570.1	6	C	S	Reduced activity by 50 percent.	NA	PubMed:12077129	DHAR1	SWISSPROT	NA	1	1	0.045	0.962	-7.937	7.18	-0.619	0.698130261	0.673329252	0.219853	0.220638	-5.001441206	-5.049216633	30	0	0	1	0	1	1	1	0	1	0	1	0	1	0	1
AT1G20900.1	91	R	H	In esc-11; Exhibits a long hypocotyl phenotype in the light.	esc-11	PubMed:24218605	AHL27	SWISSPROT	NA	1	1	0	0.999	-4.87	12.23	7.675	0.979910748	0.971390404	0.00892713	0.00892829	-16	-16	39	0	1	1	1	1	1	1	1	1	0	1	1	1	1	1
AT1G20900.1	164	G	V	NA	NA	NA	NA	ENSVATH01078577	0.1125	1	0	0.075	0.018	-0.427	NA	0.247	0.095194549	0.101703345	2.04247	2.10544	-0.289221115	-0.276573884	7	0	0	1	0	0	0	0	NA	NA	0	1	0	0	0	0
AT1G20900.1	166	G	S	NA	NA	NA	NA	ENSVATH04612414	0.05	1	NA	0.233	1	-0.154	NA	0.22	0.142904647	0.137112792	2.73E-15	2.73E-15	-0.456126812	-0.46559437	7	0	0	0	1	1	0	0	NA	NA	0	1	0	0	0	0
AT1G20900.1	264	Q	H	NA	NA	NA	NA	ENSVATH04612416	0.0375	1	NA	0.126	0.991	-1.78	NA	-9.04	0.125041172	0.125996515	0.799825	0.803334	-0.1654496	-0.169342055	8	0	0	1	0	1	0	1	NA	NA	0	0	0	0	0	0
AT1G20920.1	808	G	R	In rcf1-1; loss of function and reduced cold tolerance.	rcf1-1	PubMed:23371945	RH42	SWISSPROT	NA	1	1	0	1	-7.067	36.52	9.75	0.982646636	0.975317914	2.00E-17	6.50E-17	-16	-16	41	0	1	1	1	1	1	1	1	1	1	1	1	1	1	1
AT1G20920.1	687	E	A	Loss of ATPase activity.	NA	PubMed:23371945	RH42	SWISSPROT	NA	1	1	0	1	-6	18.4	9.75	0.981308548	0.97340522	0.00956618	0.00960813	-16	-16	40	0	1	1	1	1	1	1	1	1	1	1	1	1	1	1
AT1G20920.1	8	Y	H	NA	NA	NA	NA	ENSVATH00034836	0.1375	1	0	0.369	NA	0.432	11.83	0.969	0.234887341	0.188321103	0.206074	0.257963	-3.03691091	-3.862003785	6	0	0	0	NA	NA	0	0	1	1	0	1	0	0	0	0
AT1G20920.1	421	S	N	NA	NA	NA	NA	ENSVATH00034837	0.1625	1	0	0.71	0.001	1.518	1.11	-7.64	0.022576827	0.026411067	0.838645	0.984874	-0.01044785	-0.118469842	7	14	0	0	0	0	0	0	0	0	0	0	0	0	0	0
AT1G20920.1	1031	V	G	NA	NA	NA	NA	ENSVATH00034839	0.95	1	NA	0.379	0.917	-0.517	NA	2.53	0.128505266	0.110264496	0.367694	0.773313	-0.138162227	-0.589089547	6	0	0	0	0	1	0	0	NA	NA	0	1	0	0	0	0
AT1G20920.1	32	S	I	NA	NA	NA	NA	ENSVATH01078705	0.0375	1	NA	0.169	NA	-1.397	NA	-1.21	0.165350296	0.135620323	0.157918	0.282446	-0.606007373	-1.423493949	7	0	0	0	NA	NA	0	1	NA	NA	0	1	0	0	0	0
AT1G20920.1	208	E	A	NA	NA	NA	NA	ENSVATH04612563	0.0125	1	NA	0.423	NA	-2.724	NA	-1.61	0.165702983	0.09307905	0.282293	0.36411	-1.508945223	-1.910274999	11	3	0	0	NA	NA	0	1	NA	NA	0	1	0	0	0	0
AT1G20920.1	305	G	V	NA	NA	NA	NA	ENSVATH04612564	0.0625	1	NA	0.319	1	-5.519	8.11	0.692	0.727989959	0.628946911	0.0956626	0.119423	-4.656557925	-5.501362814	32	1	0	0	1	1	1	1	0	1	0	1	0	1	0	1
AT1G20920.1	390	M	I	NA	NA	NA	NA	ENSVATH04612565	0.0125	1	NA	0.572	0.253	-3.232	3.12	7.12	0.954583836	0.887830305	0.0603511	0.0620284	-12.67677472	-14.30233658	36	2	0	0	0	1	0	1	0	1	0	1	1	1	0	1
AT1G20920.1	449	P	S	NA	NA	NA	NA	ENSVATH04612566	0.0125	1	NA	0.646	0.077	-0.664	2.2	-11.45	0.154685465	0.14321712	0.562144	0.687472	-0.459080186	-0.752169068	9	0	0	0	0	1	0	0	0	0	0	0	0	0	0	0
AT1G20920.1	488	P	S	NA	NA	NA	NA	ENSVATH04612567	0.0125	1	NA	0.109	0.69	-7.096	9.73	8.63	0.971499779	0.932376038	0.0214269	0.021562	-14.37594181	-15.49208344	39	2	0	1	0	1	1	1	0	1	1	1	1	1	1	1
AT1G20920.1	984	A	T	NA	NA	NA	NA	ENSVATH04612572	0.025	1	NA	0.555	0.307	-2.11	5.21	-6.39	0.38149086	0.172016895	0.217618	0.286525	-1.933722539	-2.790075012	27	5	0	0	0	1	0	1	0	1	0	0	0	1	0	0
AT1G20920.1	1035	P	S	NA	NA	NA	NA	ENSVATH04612574	0.025	1	NA	0.319	0.122	-1.771	1.72	-8.24	0.114614833	0.070136009	3.66692	3.71251	-3.6120712	-3.396077627	12	4	0	0	0	1	0	1	0	0	0	0	0	0	0	0
AT1G21460.1	57	Y	A	Loss of sugar transport activity associated with reduced plasma membrane localization.	NA	PubMed:24027245	SWEET1	SWISSPROT	NA	0	1	NA	1	-8.8	21.36	8.815	0.979636114	0.971174127	0.0276341	0.0276488	-15.18368445	-15.26433005	41	0	NA	NA	1	1	1	1	1	1	1	1	1	1	1	1
AT1G21460.1	58	G	D	Loss of sugar transport activity associated with reduced plasma membrane localization.	NA	PubMed:24027245	SWEET1	SWISSPROT	NA	0	1	NA	1	-6.844	37.45	8.72	0.97478767	0.965604333	0.0242233	0.0242355	-14.22299535	-14.23941619	41	0	NA	NA	1	1	1	1	1	1	1	1	1	1	1	1
AT1G21460.1	180	G	D	Loss of sugar transport activity associated with reduced plasma membrane localization.	NA	PubMed:24027245	SWEET1	SWISSPROT	NA	0	1	0.003	1	-6.795	41.54	8.77	0.979042871	0.970859209	0.0156127	0.0156225	-15.11569526	-15.11569526	41	0	1	1	1	1	1	1	1	1	1	1	1	1	1	1
AT1G21460.1	23	P	T	Loss of sugar transport activity associated with reduced plasma membrane localization.	NA	PubMed:24027245	SWEET1	SWISSPROT	NA	0	1	0	0.999	-7.15	7.5	9.91	0.981300747	0.973397544	0.0116341	0.0116401	-16	-16	40	0	1	1	1	1	1	1	0	1	1	1	1	1	1	1
AT1G21460.1	240	N	T	NA	NA	NA	NA	ENSVATH04615927	0.0125	0	NA	0.042	0.448	-2.431	2.78	-0.636	0.31202007	0.308319838	0.46277	0.465551	-1.096061254	-1.111014467	20	0	0	1	0	1	0	1	0	0	0	1	0	1	0	1
AT1G21780.1	242	Y	A	Abolishes the interaction with CUL3A.	NA	PubMed:15772280		SWISSPROT	NA	0	1	NA	1	-8.91	39.55	10	0.982646636	0.975317914	4.36E-17	3.68E-17	-16	-16	41	0	NA	NA	1	1	1	1	1	1	1	1	1	1	1	1
AT1G21780.1	204	I	R	Abolishes the interaction with CUL3A.	NA	PubMed:15772280		SWISSPROT	NA	0	1	0.001	0.999	-6.795	32.32	10	0.97862382	0.970065021	0.0134029	0.0134155	-15.36344491	-15.36344491	40	0	1	1	1	1	1	1	1	1	1	1	1	1	1	1
AT1G21780.1	135	T	I	NA	NA	NA	NA	ENSVATH00036252	0.0125	0	NA	0.05	0.002	-2.353	4.4	-6.56	0.188423789	0.156011691	0.392601	0.393681	-1.917307959	-1.935212671	10	1	0	1	0	0	0	1	0	1	0	0	0	0	0	0
AT1G21780.1	184	T	I	NA	NA	NA	NA	ENSVATH04617832	0.025	0	NA	0.008	0.033	-2.189	24.68	9	0.548025416	0.481537786	0.0694745	0.0695523	-9.782945035	-9.807892451	7	0	1	1	0	0	0	1	1	1	1	1	0	1	0	1
AT1G21780.1	234	A	P	NA	NA	NA	NA	ENSVATH04617836	0.0125	0	NA	0.116	0.192	-3.47	5.99	-3.76	0.504468406	0.320126385	0.19416	0.194518	-3.820925276	-3.84362654	29	4	0	1	0	1	0	1	0	1	0	0	0	1	0	1
AT1G21970.1	85	D	K	Affects function.	NA	PubMed:12578989	NFYB9	SWISSPROT	NA	1	1	NA	1	-6.635	4.59	7.73	0.97883414	0.964520664	0.025527	0.0255328	-16	-16	40	1	NA	NA	1	1	1	1	0	1	0	1	1	1	1	1
AT1G21970.1	230	A	V	NA	NA	NA	NA	ENSVATH00036464	0.125	1	0	0.473	0	-0.878	2.41	-5.15	0.033252276	0.074473209	0.823549	0.824892	-0.219098979	-0.221596932	2	8	0	0	0	0	0	0	0	0	0	0	0	0	0	0
AT1G21970.1	48	V	M	NA	NA	NA	NA	ENSVATH01084667	0.175	1	0	0.158	0.869	-0.22	2.62	-14.3	0.033958074	0.049679991	8.48709	8.80198	-1.75706123	-1.691230759	6	0	0	0	0	1	0	0	0	0	0	0	0	0	0	0
AT1G21970.1	31	M	I	NA	NA	NA	NA	ENSVATH04619287	0.0125	1	NA	0.365	0.003	-0.367	NA	-8.6	0.074057357	0.088440378	5.32137	5.60022	-2.551387968	-2.491312752	6	0	0	0	0	0	0	0	NA	NA	0	0	0	0	0	0
AT1G22050.1	116	C	S	Loss of prenylation and membrane localization.	NA	PubMed:16831869	MUB6	SWISSPROT	NA	1	1	0	1	-8.213	5.66	6.475	0.862207401	0.843172474	0.133772	0.133796	-7.205763679	-7.208630805	37	0	1	1	1	1	1	1	0	1	0	1	0	1	0	1
AT1G22740.1	67	Q	L	Constitutively active (GTP bound form); stimulates autophagy and tracheary element formation.	NA	PubMed:20659276	RABG3B	SWISSPROT	NA	1	1	0.004	0.879	-6.642	19.88	10	0.981548343	0.97418611	2.00E-17	2.00E-17	-15.36344491	-15.36344491	42	0	1	1	0	1	1	1	1	1	1	1	1	1	1	1
AT1G22740.1	22	T	N	Dominant negative (GDP-bound form); inhibits autophagy and tracheary element formation.	NA	PubMed:20659276	RABG3B	SWISSPROT	NA	1	1	NA	0.999	-4.136	14.72	10	0.966298529	0.955681284	0.0220151	0.0220198	-12.83569772	-12.83967856	41	0	NA	NA	1	1	0	1	1	1	1	1	1	1	1	1
AT1G22740.1	93	L	V	NA	NA	NA	NA	ENSVATH04625283	0.0125	1	NA	0.307	0.015	-0.647	6.08	3.08	0.455940698	0.407364197	0.186326	0.186362	-7.501620515	-7.504455661	9	0	0	0	0	0	0	0	0	1	0	1	0	1	0	1
AT1G22770.1	162	S	R	NA	NA	NA	NA	ENSVATH00038317	0.2625	0	0	0.079	0.001	-2.436	4.02	1.49	0.277505156	0.240953049	0.491092	0.491786	-1.277959525	-1.283459132	19	1	0	1	0	0	0	1	0	1	0	1	0	0	0	0
AT1G22770.1	883	T	I	NA	NA	NA	NA	ENSVATH00038325	0.025	0	NA	0.016	0.301	-4.917	3.89	6.3	0.775889565	0.725139047	0.151568	0.151671	-5.030047143	-5.036394426	37	1	1	1	0	1	1	1	0	1	0	1	0	1	0	1
AT1G22770.1	113	I	V	NA	NA	NA	NA	ENSVATH01090074	0.05	0	NA	0.422	0.033	-0.908	7.87	3.91	0.788381343	0.689446469	0.0390196	0.0390514	-7.562079872	-7.570826086	32	2	0	0	0	0	0	0	0	1	0	1	0	1	0	1
AT1G22770.1	651	Y	F	NA	NA	NA	NA	ENSVATH01090084	0.0125	0	NA	0	0.855	-3.75	5.69	8.76	0.899610292	0.883648505	0.0683168	0.0683545	-7.784968172	-7.791461903	40	0	1	1	0	1	0	1	0	1	1	1	1	1	0	1
AT1G22770.1	1097	M	V	NA	NA	NA	NA	ENSVATH01090089	0.0125	0	NA	0.196	0.028	-1.56	24.68	-1.42	0.218507644	0.207308671	0.248179	0.248825	-2.078906338	-2.08779017	10	0	0	0	0	0	0	1	1	1	0	1	0	0	0	0
AT1G22770.1	30	H	L	NA	NA	NA	NA	ENSVATH04625593	0.0125	0	NA	0.008	0.181	-1.898	6.27	-3.145	0.175333924	0.166449144	0.313074	0.313579	-1.89645625	-1.902982295	7	0	1	1	0	1	0	1	0	1	0	0	0	0	0	0
AT1G22770.1	155	D	N	NA	NA	NA	NA	ENSVATH04625602	0.0125	0	NA	0.028	0.023	-1.483	6.63	9.28	0.272191418	0.277285288	0.125415	0.091585	-6.736184097	-5.740535139	3	0	1	1	0	0	0	1	0	1	1	1	0	0	0	0
AT1G22770.1	242	M	L	NA	NA	NA	NA	ENSVATH04625606	0.025	0	NA	0.358	0.001	-1.725	4.04	4.67	0.677850307	0.656350341	0.229304	0.229492	-4.607947054	-4.616514967	30	0	0	0	0	0	0	1	0	1	0	1	0	1	0	1
AT1G22770.1	357	S	T	NA	NA	NA	NA	ENSVATH04625610	0.0125	0	NA	0.163	0.075	-1.116	1.48	-3.515	0.157059789	0.027569483	0.542855	0.543527	-0.968842085	-0.972572919	27	11	0	0	0	1	0	0	0	0	0	0	0	0	0	0
AT1G22770.1	612	E	D	NA	NA	NA	NA	ENSVATH04625623	0.0125	0	NA	0.311	0.021	-1.12	3.18	-5.63	0.361553284	0.280482109	0.404139	0.404586	-1.864943715	-1.870406772	24	2	0	0	0	0	0	0	0	1	0	0	0	1	0	0
AT1G22770.1	628	N	S	NA	NA	NA	NA	ENSVATH04625624	0.0625	0	NA	0.741	0	-0.58	1.56	-12.4	0.049883091	0.008230096	1.2307	1.00922	-0.007242858	-0.189928187	14	11	0	0	0	0	0	0	0	0	0	0	0	0	0	0
AT1G22770.1	766	R	K	NA	NA	NA	NA	ENSVATH04625626	0.0125	0	NA	0.04	0.184	-2.224	2.46	5.35	0.698283339	0.648717763	0.200469	0.200696	-3.194156735	-3.200620159	37	1	0	1	0	1	0	1	0	0	0	1	0	1	0	1
AT1G22770.1	859	G	A	NA	NA	NA	NA	ENSVATH04625631	0.0125	0	NA	1	0.004	0.646	3.93	-4.55	0.153905785	0.087687425	1.15173	1.15443	-0.160160087	-0.157370793	19	4	0	0	0	0	0	0	0	1	0	0	0	0	0	0
AT1G22770.1	932	S	N	NA	gi-200	http://www.ncbi.nlm.nih.gov/pmc/articles/PMC4306306/	GI	MANUAL	NA	0	1	0.054	0.996	-2.489	11.06	5.46	0.875572537	0.85607466	0.0728692	0.0729257	-7.689803913	-7.698970002	37	0	0	1	1	1	0	1	0	1	0	1	0	1	0	1
AT1G22770.1	191	S	F	NA	gi-596	http://www.ncbi.nlm.nih.gov/pmc/articles/PMC4306306/	GI	MANUAL	NA	0	1	0.001	1	-5.393	22.59	8.84	0.844225262	0.820677814	0.0368474	0.0368682	-7.470351525	-7.476779164	34	0	1	1	1	1	1	1	1	1	1	1	0	1	0	1
AT1G22770.1	281	L	F	NA	gi-611	http://www.ncbi.nlm.nih.gov/pmc/articles/PMC4306306/	GI	MANUAL	NA	0	1	0	1	-3.81	12.59	5.16	0.898618867	0.880366438	2.77E-16	2.30E-16	-8.356870193	-8.363555224	38	0	1	1	1	1	0	1	1	1	0	1	1	1	0	1
AT1G22940.1	63	S	F	In th1-201; loss of activity and seedling lethality.	th1-201	PubMed:17174261	TH1	SWISSPROT	NA	0	1	0	0.98	-3.509	23.49	8.01	0.642823412	0.592851041	0.0526333	0.0526738	-8.182028943	-8.193738597	17	0	1	1	0	1	0	1	1	1	1	1	0	1	0	1
AT1G22940.1	333	L	V	NA	NA	NA	NA	ENSVATH00038682	0.0625	0	NA	1	0	2.643	0.43	5	0.002203541	0.714077983	0.166955	0.127675	-4.723699075	-3.851267816	1	37	0	0	0	0	0	0	0	0	0	1	0	0	0	1
AT1G22940.1	131	V	A	NA	NA	NA	NA	ENSVATH04626730	0.0125	0	NA	0.001	0.377	-3.431	16.26	8.79	0.897995788	0.879822907	0.046565	0.0465947	-8.365523727	-8.376432333	38	0	1	1	0	1	0	1	1	1	1	1	1	1	0	1
AT1G22940.1	208	P	S	NA	NA	NA	NA	ENSVATH04626743	0.0125	0	NA	0.43	0.143	-4.916	8.53	7.92	0.919252878	0.902876497	0.065345	0.0653905	-9.239471143	-9.251937549	39	0	0	0	0	1	1	1	0	1	0	1	1	1	0	1
AT1G22940.1	227	R	G	NA	NA	NA	NA	ENSVATH04626745	0.0125	0	NA	0.107	0.153	-4.373	5.19	7.33	0.59318802	0.577488343	0.277344	0.277676	-3.282401885	-3.292574613	29	0	0	1	0	1	0	1	0	1	0	1	0	1	0	1
AT1G23310.1	109	L	F	In ggt1-1; loss of alanine aminotransferase activity. Pale green and slow growth, with increased light sensitivity. Impaired ABA and stress responses, including gene expression, proline and ABA metabolism stimulation.	ggt1-1	PubMed:17318317	GGAT1	SWISSPROT	NA	1	1	0.111	0.558	-1.53	5.27	-14	0.171220566	0.176052754	0.989862	0.991676	-0.006805896	-0.008320368	14	0	0	1	0	1	0	1	0	1	0	0	0	0	0	0
AT1G23310.1	423	A	V	NA	NA	NA	NA	ENSVATH04629896	0.075	1	NA	0.204	0.977	-3.14	23.83	8.65	0.912091702	0.895438835	0.0387292	0.0387378	-8.788036235	-8.792546038	39	0	0	0	0	1	0	1	1	1	1	1	1	1	0	1
AT1G23310.1	126	Y	F	NA	NA	NA	NA	ENSVATH04629912	0.0125	1	NA	0.688	0.006	-1.389	4.16	7.1	0.890368096	0.852595914	0.0643344	0.0643489	-7.901366652	-7.905305314	40	1	0	0	0	0	0	1	0	1	0	1	0	1	0	1
AT1G24180.1	121	R	C	In iar4-1; reduced sensitivity to several IAA-amino acid conjugates.	iar4-1	PubMed:15173569	IAR4	SWISSPROT	NA	1	1	0	1	-7.313	29.01	4.47	0.946598733	0.933428764	2.77E-16	1.85E-16	-10.55808345	-10.57035267	41	0	1	1	1	1	1	1	1	1	0	1	1	1	1	1
AT1G24180.1	2	A	T	NA	NA	NA	NA	ENSVATH00041955	0.0125	1	NA	0.504	0.796	-1.096	17.95	7.97	0.807842176	0.786920381	0.0707775	0.0707963	-5.974833459	-5.977707754	35	0	0	0	0	1	0	0	1	1	1	1	0	1	0	1
AT1G24180.1	64	L	F	NA	NA	NA	NA	ENSVATH01098199	0.4	1	0	0.008	0.022	-1.61	4.94	-18.8	0.302285507	0.306351327	0.714019	0.714534	-0.448356077	-0.449818137	22	0	1	1	0	0	0	1	0	1	0	0	0	0	0	1
AT1G24180.1	361	I	V	NA	NA	NA	NA	ENSVATH04635313	0.0625	1	NA	0.3	0	-0.009	6.38	2.37	0.101864874	0.275485616	0.193104	0.161641	-6.31763377	-5.537901619	1	8	0	0	0	0	0	0	0	1	0	1	0	0	0	0
AT1G24180.1	65	A	S	NA	NA	NA	NA	ENSVATH04635344	0.0125	1	NA	0.722	0	0.98	0.58	-6.875	0.033051403	0.015961219	1.13532	1.13788	-0.161205042	-0.158425313	8	11	0	0	0	0	0	0	0	0	0	0	0	0	0	0
AT1G25220.1	150	G	D	In trp4-1; no visible phenotype under normal growth conditions.	trp4-1	PubMed:8400875	ASB1	SWISSPROT	NA	1	1	NA	1	-6.666	35.86	10	0.983859296	0.977064892	7.84E-19	2.30E-16	-16	-16	42	0	NA	NA	1	1	1	1	1	1	1	1	1	1	1	1
AT1G25220.1	176	G	E	In wei7-2; insensitive to inhibition of root elongation by ethylene.	wei7-2	PubMed:15980261	ASB1	SWISSPROT	NA	1	1	0.001	1	-7.019	35.36	10	0.983859296	0.977064892	2.11E-16	3.68E-17	-16	-16	42	0	1	1	1	1	1	1	1	1	1	1	1	1	1	1
AT1G25220.1	4	S	F	NA	NA	NA	NA	ENSVATH01101130	0.0375	1	NA	0.001	0.671	-0.893	4.36	-11.58	0.102305712	0.106307462	1.87844	1.56042	-0.526070932	-0.837008677	6	0	1	1	0	1	0	0	0	1	0	0	0	0	0	0
AT1G25220.2	4	S	F	NA	NA	NA	NA	ENSVATH01101130	0.0375	1	NA	0.001	0.817	-0.893	3.45	-13.9	0.102137236	0.105463174	1.63383	1.36403	-0.328734567	-0.593277624	6	0	1	1	0	1	0	0	0	1	0	0	0	0	0	0
AT1G25220.1	96	G	E	NA	NA	NA	NA	ENSVATH04638958	0.025	1	NA	0.009	0.935	-6.778	12.2	7.99	0.971825783	0.954236746	0.00977422	0.00977737	-14.59474075	-14.61413108	40	1	1	1	0	1	1	1	1	1	1	1	1	1	1	1
AT1G25220.2	109	G	E	NA	NA	NA	NA	ENSVATH04638958	0.025	1	NA	0.008	0.935	-6.764	11.95	8.02	0.952872267	0.928433637	0.0131639	0.0131702	-12.10480792	-12.12023913	40	1	1	1	0	1	1	1	1	1	1	1	1	1	1	1
AT1G25220.1	43	S	N	NA	NA	NA	NA	ENSVATH04638978	0.0125	1	NA	0.216	0.001	-0.129	1.71	-17.9	0.096396421	0.072874855	1.38699	1.39636	-0.534006294	-0.522223455	8	2	0	0	0	0	0	0	0	0	0	0	0	0	0	0
AT1G25220.2	43	S	N	NA	NA	NA	NA	ENSVATH04638978	0.0125	1	NA	0.184	0	-0.129	1.9	-17.9	0.097541784	0.073940216	1.48798	1.49959	-0.695380237	-0.680456742	8	2	0	0	0	0	0	0	0	0	0	0	0	0	0	0
AT1G25220.1	19	T	S	NA	NA	NA	NA	ENSVATH04638983	0.0125	1	NA	0.525	0.005	0.158	1.88	-5.77	0.032191992	0.026131148	0.696217	0.698511	-0.523465439	-0.531087273	7	12	0	0	0	0	0	0	0	0	0	0	0	0	0	0
AT1G25220.2	19	T	S	NA	NA	NA	NA	ENSVATH04638983	0.0125	1	NA	0.52	0.01	0.158	1.6	-7.332	0.030884968	0.025236456	0.759226	0.761867	-0.384209815	-0.391579879	7	12	0	0	0	0	0	0	0	0	0	0	0	0	0	0
AT1G25220.2	177	G	E	NA	wei7-2	http://www.plantcell.org/content/17/8/2230.full	ASB1	MANUAL	NA	1	1	0	0.999	-7.6	37.16	8.94	0.959705086	0.947561265	0.0256218	0.0256342	-12.30497212	-12.32022335	40	0	1	1	1	1	1	1	1	1	1	1	1	1	1	1
AT1G25580.1	399	P	T	NA	NA	NA	NA	ENSVATH01103040	0.1625	0	0	0.679	0	-3.466	2.68	-2.36	0.071294385	0.017131129	0.662124	0.58882	-0.87815794	-0.608602598	13	9	0	0	0	0	0	1	0	0	0	0	0	0	0	0
AT1G25580.1	384	L	V	NA	NA	NA	NA	ENSVATH01103042	0.1625	0	0	0.35	0.172	0.568	2.22	-6.38	0.096631772	0.064937158	3.77738	3.8264	-4.480454193	-4.443740931	5	3	0	0	0	1	0	0	0	0	0	0	0	0	0	0
AT1G25580.1	25	D	H	NA	NA	NA	NA	ENSVATH01103075	0.1625	0	0	0.161	0.962	-4.186	5.54	2.9	0.719443702	0.698269368	0.18214	0.182372	-4.790342925	-4.806995128	32	0	0	0	0	1	0	1	0	1	0	1	0	1	0	1
AT1G25580.1	396	H	R	NA	NA	NA	NA	ENSVATH04642027	0.0125	0	NA	0.64	0	-0.408	2.77	-4.59	0.062388426	0.025243644	2.88735	2.98677	-2.515690193	-2.412904441	7	6	0	0	0	0	0	0	0	0	0	0	0	0	0	0
AT1G25580.1	308	G	A	NA	NA	NA	NA	ENSVATH04642028	0.0125	0	NA	0.927	0	0.626	6.85	3.94	0.055433608	0.069290411	1.90013	1.70385	-0.909431596	-1.210350201	1	3	0	0	0	0	0	0	0	1	0	1	0	0	0	0
AT1G25580.1	144	D	N	NA	NA	NA	NA	ENSVATH04642033	0.0125	0	NA	0.509	0.996	-3.007	2.17	4.74	0.533891281	0.477975089	0.285343	0.285904	-2.734340368	-2.749450705	29	1	0	0	1	1	0	1	0	0	0	1	0	1	0	1
AT1G25580.1	206	S	F	NA	NA	http://www.plantcell.org/content/27/9/2501.long	SOG1	MANUAL	NA	0	1	0	0.998	-6	21.57	10	0.978619511	0.970323608	1.61E-16	5.61E-16	-15.00516482	-15.00516482	41	0	1	1	1	1	1	1	1	1	1	1	1	1	1	1
AT1G25580.1	155	G	R	NA	NA	http://www.plantcell.org/content/27/9/2501.long	SOG1	MANUAL	NA	0	1	0	1	-7.973	36.52	10	0.974998942	0.965877979	1.61E-16	5.61E-16	-14.24786547	-14.25648318	41	0	1	1	1	1	1	1	1	1	1	1	1	1	1	1
AT1G26370.1	295	L	P	In rid1-1; Reduced efficiency of pre-mRNA splicing.	rid1-1	NA	RID1	SWISSPROT	NA	0	1	0	1	-6.598	36.32	9	0.982646636	0.975317914	7.84E-19	2.77E-16	-16	-16	41	0	1	1	1	1	1	1	1	1	1	1	1	1	1	1
AT1G26370.1	448	Q	H	NA	NA	NA	NA	ENSVATH00044801	0.1	0	NA	0.083	1	-4.454	11.18	3.46	0.880607995	0.860229069	0.121139	0.121197	-8.301029987	-8.309741874	36	0	0	1	1	1	0	1	1	1	0	1	0	1	0	1
AT1G26370.1	714	Q	R	NA	NA	NA	NA	ENSVATH01104449	0.025	0	NA	0.817	0	0.223	2.64	-0.045	0.127024966	0.113222719	0.289211	0.247934	-3.021842774	-2.406943328	2	1	0	0	0	0	0	0	0	0	0	1	0	0	0	0
AT1G26370.1	557	E	V	NA	NA	NA	NA	ENSVATH01104456	0.0125	0	NA	0.104	0.497	-5.781	27.46	8.17	0.856354947	0.829185429	0.0828773	0.0829117	-8.999999957	-8.999999957	31	0	0	1	0	1	1	1	1	1	1	1	0	1	0	1
AT1G26370.1	679	E	D	NA	NA	NA	NA	ENSVATH04643587	0.0125	0	NA	0.473	0.018	-0.637	2.08	-12.9	0.156894011	0.012156325	0.147414	0.147528	-5.641066282	-5.652712928	19	15	0	0	0	0	0	0	0	0	0	0	0	0	0	0
AT1G26370.1	513	L	S	NA	NA	NA	NA	ENSVATH04643590	0.0125	0	NA	0.701	0.674	-2.646	4.2	-6.74	0.46712893	0.442557775	0.16092	0.161021	-3.894336562	-3.901747488	20	0	0	0	0	1	0	1	0	1	0	0	0	1	0	1
AT1G26370.1	510	A	S	NA	NA	NA	NA	ENSVATH04643591	0.0125	0	NA	0.042	0.841	-2.326	10.14	6.05	0.929538311	0.873474917	0.0357802	0.0357889	-13.12342367	-13.13445366	33	2	0	1	0	1	0	1	0	1	0	1	1	1	0	1
AT1G26370.1	470	A	P	NA	NA	NA	NA	ENSVATH04643592	0.0125	0	NA	0.058	1	-4.145	11.57	5.47	0.926029953	0.905976125	0.0401369	0.0401478	-11.38332498	-11.39402732	34	0	0	1	1	1	0	1	1	1	0	1	1	1	1	1
AT1G26370.1	465	K	R	NA	NA	NA	NA	ENSVATH04643596	0.0125	0	NA	0.072	0.028	-1.912	3.55	7.86	0.918112483	0.855369461	0.0421863	0.0422017	-12.71083262	-12.72467713	32	2	0	1	0	0	0	1	0	1	0	1	1	1	0	1
AT1G26370.1	419	R	H	NA	NA	NA	NA	ENSVATH04643598	0.0125	0	NA	0.001	0.935	-4.288	11.75	9.025	0.978989629	0.965055465	0.00981118	0.00981371	-15.67567227	-15.67567227	41	1	1	1	0	1	0	1	1	1	1	1	1	1	1	1
AT1G26370.1	183	R	H	NA	NA	NA	NA	ENSVATH04643606	0.0375	0	NA	0.012	0.022	-1.587	3.04	-3.075	0.065461179	0.017279028	0.595355	0.597269	-0.56560996	-0.571712906	10	8	1	1	0	0	0	1	0	1	0	0	0	0	0	0
AT1G26370.1	180	K	N	NA	NA	NA	NA	ENSVATH04643607	0.0125	0	NA	0.423	0.001	0.279	1.96	-18	0.223257005	0.0648179	0.337741	0.338189	-2.436980746	-2.446647428	23	8	0	0	0	0	0	0	0	0	0	0	0	0	0	0
AT1G26370.1	45	S	L	NA	NA	NA	NA	ENSVATH04643611	0.0125	0	NA	0.31	0.013	-3.906	5.37	2.995	0.800793592	0.773562419	0.104602	0.104635	-7.171351701	-7.17857098	31	0	0	0	0	0	0	1	0	1	0	1	0	1	0	1
AT1G26370.1	33	K	N	NA	NA	NA	NA	ENSVATH04643612	0.0125	0	NA	0.452	0.012	-2.451	2.13	-4.28	0.350613631	0.297093423	0.316765	0.317124	-3.042743355	-3.052274232	18	1	0	0	0	0	0	1	0	0	0	0	0	1	0	1
AT1G26630.1	51	K	S	Loss of activity.	NA	PubMed:24163315	ELF5A-2	SWISSPROT	NA	1	1	NA	0.997	-4.743	23	10	0.983859296	0.977064892	2.05E-17	2.05E-17	-16	-16	42	0	NA	NA	1	1	1	1	1	1	1	1	1	1	1	1
AT1G26630.1	2	S	A	Loss of phosphorylation.	NA	PubMed:20018887	ELF5A-2	SWISSPROT	NA	1	1	0.496	0.074	-2.202	8.56	9.355	0.956079818	0.933254738	0.0218168	0.0218389	-12.10999447	-12.12936496	41	1	0	0	0	1	0	1	0	1	1	1	1	1	1	1
AT1G26630.1	4	D	E	NA	NA	NA	NA	ENSVATH00045072	0.15	1	0	0.853	0	1.192	0.68	-11.5	0.017237933	0.643496799	0.0626315	0.062691	-11.11277442	-11.1388134	6	36	0	0	0	0	0	0	0	0	0	0	0	0	0	1
AT1G26630.1	10	A	P	NA	NA	NA	NA	ENSVATH00045073	0.15	1	0	0.078	0	-1.53	20.21	7.36	0.544990947	0.542517848	0.0393942	0.0193639	-13.00281508	-11.44389901	2	0	0	1	0	0	0	1	1	1	0	1	0	1	0	1
AT1G26630.1	121	G	S	NA	NA	NA	NA	ENSVATH01105989	0.3125	1	0	0.663	0	1.175	2.36	2.87	0.034471418	0.09523571	0.836042	0.714345	-0.390286096	-0.174602447	1	7	0	0	0	0	0	0	0	0	0	1	0	0	0	0
AT1G26630.1	121	G	D	NA	NA	NA	NA	ENSVATH01105990	0.3	1	0	0.619	0	0.205	25.91	-14.7	0.078162128	0.082607959	0.836042	0.714345	-0.390286096	-0.174602447	1	0	0	0	0	0	0	0	1	1	0	0	0	0	0	0
AT1G26630.1	136	I	V	NA	NA	NA	NA	ENSVATH01105998	0.15	1	0	0.642	0	-0.756	8.06	-12.5	0.1606145	0.128186148	0.123371	0.0948982	-6.71563921	-5.727299943	4	6	0	0	0	0	0	0	0	1	0	0	0	0	0	0
AT1G27320.1	449	V	A	Constitutively activated independently of cytokinin.	NA	PubMed:17956858	AHK3	SWISSPROT	NA	0	1	0.191	0.975	-3.956	20.01	10	0.588610632	0.57553502	0.229007	0.229127	-2.808208167	-2.813150981	30	0	0	0	0	1	0	1	1	1	1	1	0	1	0	1
AT1G27320.1	448	D	N	Delayed leaf senescence.	NA	http://www.pnas.org/content/103/3/814.full	AHK3	BOTH	NA	0	1	0.085	0.998	-4.882	13.97	10	0.981423163	0.973786987	6.50E-17	6.50E-17	-15.67567227	-15.67567227	41	0	0	1	1	1	1	1	1	1	1	1	1	1	1	1
AT1G27320.1	713	S	F	In ahk3-4; reduced sensitivity to cytokinin (mostly in roots), and impaired cytokinin repression of several Pi starvation-responsive genes and increased sucrose sensitivity.	ahk3-4	http://www.plantphysiol.org/content/138/2/847.full	AHK3	BOTH	NA	0	1	0	1	-5.976	22.54	8.285	0.928416098	0.912643946	0.0522208	0.052235	-9.842606401	-9.848804577	39	0	1	1	1	1	1	1	1	1	1	1	1	1	1	1
AT1G27320.1	243	P	S	In ore12-1; delayed leaf senescence and abolished cytokinin-dependent phosphorylation activity toward ARR2.	ore12-1	http://www.pnas.org/content/103/3/814.full	AHK3	BOTH	NA	0	1	0.007	1	-7.783	17.5	9.98	0.979248002	0.970823595	1.53E-16	1.61E-16	-15.49208344	-15.49208344	40	0	1	1	1	1	1	1	1	1	1	1	1	1	1	1
AT1G27320.1	281	T	I	Loss of cyokinin-mediated activation.	NA	PubMed:17956858	AHK3	SWISSPROT	NA	0	1	0.004	1	-5.885	33.48	10	0.977218376	0.968614003	1.12E-16	4.36E-17	-14.70171909	-14.70171909	41	0	1	1	1	1	1	1	1	1	1	1	1	1	1	1
AT1G27320.1	661	V	L	NA	NA	NA	NA	ENSVATH00046470	0.1125	0	0	0.65	0	0.582	0.94	-13.1	0.006550739	0.129456083	2.12531	1.71002	-0.538379936	-0.916167843	3	21	0	0	0	0	0	0	0	0	0	0	0	0	0	0
AT1G27320.1	595	D	E	NA	NA	NA	NA	ENSVATH01111141	0.1125	0	0	1	0	0.824	0.75	-6.17	0.004449492	0.426509064	0.190896	0.162001	-4.61688869	-3.826074021	4	33	0	0	0	0	0	0	0	0	0	0	0	0	0	1
AT1G27320.1	966	R	K	NA	NA	NA	NA	ENSVATH01111159	0.1375	0	0	0.971	0.039	-0.303	1.34	-0.996	0.15814654	0.103393932	0.850361	0.853322	-0.126114079	-0.129417614	17	3	0	0	0	1	0	0	0	0	0	1	0	0	0	0
AT1G27320.1	637	R	W	NA	NA	NA	NA	ENSVATH04651368	0.0125	0	NA	0.193	0.947	-1.708	3.56	-9.69	0.125053128	0.131483221	2.0721	2.07942	-1.400289371	-1.392917236	8	0	0	0	0	1	0	1	0	1	0	0	0	0	0	0
AT1G27320.1	776	R	C	NA	NA	NA	NA	ENSVATH04651370	0.0125	0	NA	0.025	0.845	-0.96	7.77	5.32	0.261527169	0.236633865	0.1805	0.180581	-4.499386221	-4.505340415	6	0	1	1	0	1	0	0	0	1	0	1	0	0	0	0
AT1G27320.1	793	M	L	NA	NA	NA	NA	ENSVATH04651371	0.0125	0	NA	0.51	0.009	-2.358	5.4	4.97	0.762918749	0.384110625	0.0436682	0.0436822	-11.38099959	-11.38997258	29	8	0	0	0	0	0	1	0	1	0	1	0	1	0	1
AT1G27320.1	973	L	S	NA	NA	NA	NA	ENSVATH04651374	0.0125	0	NA	0.501	0.002	3.075	2.05	2.522	0.038259239	0.043080614	0.340881	0.3411	-2.177740362	-2.181455433	7	14	0	0	0	0	0	0	0	0	0	1	0	0	0	0
AT1G27450.1	168	G	E	In apt1-4; reduces activity 3-fold.	apt1-4	PubMed:23658065	APT1	SWISSPROT	NA	1	1	0	1	-7.937	32.64	8.67	0.960755051	0.949334443	0.0192086	0.0192105	-12.09557769	-12.09816912	41	0	1	1	1	1	1	1	1	1	1	1	1	1	1	1
AT1G27450.1	85	P	T	In apt1-5; loss of activity.	apt1-5	PubMed:23658065	APT1	SWISSPROT	NA	1	1	0	1	-7.304	4.02	10	0.977149183	0.968279112	0.0150923	0.0150916	-14.65572172	-14.70171909	41	0	1	1	1	1	1	1	0	1	1	1	1	1	1	1
AT1G27450.1	99	L	F	In apt1-6; reduces activity 10-fold.	apt1-6	PubMed:23658065	APT1	SWISSPROT	NA	1	1	0.049	1	-3.733	7.11	6.12	0.951905546	0.937940198	0.0372069	0.0376339	-10.98082553	-11.12157702	41	0	0	1	1	1	0	1	0	1	0	1	1	1	1	1
AT1G27450.1	149	R	K	In apt1-7; loss of activity and male sterility.	apt1-7	PubMed:23658065	APT1	SWISSPROT	NA	1	1	0	0.999	-2.938	3.72	8.93	0.972545702	0.955738784	0.0153043	0.0153062	-14.38755524	-14.39948668	41	1	1	1	1	1	0	1	0	1	1	1	1	1	1	1
AT1G27450.1	195	G	D	In apt1-8; loss of activity and male sterility.	apt1-8	PubMed:23658065	APT1	SWISSPROT	NA	1	1	0	1	-6.907	41.56	8.67	0.966504677	0.955922367	0.0175569	0.0175589	-12.86225355	-12.8650742	41	0	1	1	1	1	1	1	1	1	1	1	1	1	1	1
AT1G27450.1	196	G	R	In apt1-9; loss of activity and male sterility.	apt1-9	NA	APT1	SWISSPROT	NA	1	1	0	1	-7.896	36.52	10	0.978501465	0.970345169	1.36E-16	1.36E-16	-14.61413108	-14.63442779	42	0	1	1	1	1	1	1	1	1	1	1	1	1	1	1
AT1G27450.1	50	F	L	NA	NA	NA	NA	ENSVATH01111739	0.2125	1	0	0.348	0	-0.065	3.03	-7.09	0.087527515	0.065241758	1.01626	1.01793	-0.01477253	-0.013392612	7	2	0	0	0	0	0	0	0	1	0	0	0	0	0	0
AT1G27450.1	22	C	R	NA	NA	NA	NA	ENSVATH04651857	0.025	1	NA	0.005	0	-0.422	NA	-11.8	0.012250615	0.093469281	5.74321	1.82387	-0.34201533	-1.104393498	1	9	1	1	0	0	0	0	NA	NA	0	0	0	0	0	0
AT1G27450.1	48	R	G	NA	NA	NA	NA	ENSVATH04651858	0.0125	1	NA	0.147	0	-0.577	2.3	-16.3	0.088803141	0.079191487	1.55053	1.56676	-0.377163486	-0.367941754	6	1	0	1	0	0	0	0	0	0	0	0	0	0	0	0
AT1G27450.1	56	S	N	NA	NA	NA	NA	ENSVATH04651861	0.0125	1	NA	0.201	0.425	-0.487	2.14	-14.9	0.125670819	0.137750949	2.92649	2.94963	-1.559840565	-1.551731286	10	0	0	0	0	1	0	0	0	0	0	0	0	0	0	0
AT1G27695.1	41	G	D	In tgd5-1; loss of function.	tgd5-1	PubMed:26410300	TGD5	SWISSPROT	NA	0	1	0.054	0.997	-3.439	38.6	-0.0928	0.913819281	0.891615466	0.0440767	0.0440879	-10.95084015	-10.96591726	33	0	0	1	1	1	0	1	1	1	0	1	1	1	0	1
AT1G27695.1	82	V	M	NA	NA	NA	NA	ENSVATH01113035	0.9375	0	NA	0.065	0.009	-0.014	2.26	-16.5	0.047899854	0.057397333	4.387	2.79059	-1.081430277	-2.303326526	1	2	0	1	0	0	0	0	0	0	0	0	0	0	0	0
AT1G27695.1	82	V	E	NA	NA	NA	NA	ENSVATH01113036	0.9375	0	NA	0.052	0	0.365	4.43	-16.4	0.060515827	0.070517691	4.387	2.79059	-1.081430277	-2.303326526	1	0	0	1	0	0	0	0	0	1	0	0	0	0	0	0
AT1G28320.1	237	S	A	75% reduction of proteolytic activity.	NA	PubMed:18952862	DEG15	SWISSPROT	NA	0	1	0	1	-2.65	28.89	7.45	0.925428093	0.909342857	1.94E-17	4.36E-17	-9.588723657	-9.592355732	39	0	1	1	1	1	0	1	1	1	0	1	1	1	1	1
AT1G28320.1	252	S	A	75% reduction of proteolytic activity.	NA	PubMed:18952862	DEG15	SWISSPROT	NA	0	1	0	0.999	-2.823	8.16	6.815	0.828595262	0.81310903	0.098266	0.0982968	-5.276782475	-5.279286808	39	0	1	1	1	1	0	1	0	1	0	1	0	1	0	1
AT1G28320.1	377	S	A	90% reduction of proteolytic activity.	NA	PubMed:18952862	DEG15	SWISSPROT	NA	0	1	0	1	-2.9	10.17	9.52	0.930601137	0.916445964	0.0313386	0.0313468	-9.292222008	-9.295778165	41	0	1	1	1	1	0	1	0	1	1	1	1	1	1	1
AT1G28320.1	464	D	E	NA	NA	NA	NA	ENSVATH00048237	0.0125	0	NA	0.823	0.013	-0.683	3.66	-20	0.139763286	0.138669009	0.678418	0.678916	-0.650180671	-0.652322688	8	0	0	0	0	0	0	0	0	1	0	0	0	0	0	0
AT1G28320.1	702	R	C	NA	NA	NA	NA	ENSVATH04657525	0.0125	0	NA	0.028	0.014	-3.626	6.51	0.308	0.14764601	0.12723983	0.701117	0.702746	-0.512383739	-0.518057432	11	1	1	1	0	0	0	1	0	1	0	1	0	0	0	0
AT1G28320.1	633	T	M	NA	NA	NA	NA	ENSVATH04657528	0.0125	0	NA	0.11	0.6	-2.002	2.39	1.3	0.103330713	0.105365061	1.26123	0.975251	-0.02534326	-0.295618665	6	0	0	1	0	1	0	1	0	0	0	1	0	0	0	0
AT1G28320.1	560	Q	E	NA	NA	NA	NA	ENSVATH04657532	0.1	0	NA	1	0.512	-0.513	7.27	-9.12	0.189296793	0.213372323	5.25442	5.27949	-5.730762663	-5.71351883	11	0	0	0	0	1	0	0	0	1	0	0	0	0	0	0
AT1G28320.1	520	A	V	NA	NA	NA	NA	ENSVATH04657534	0.05	0	NA	0.718	0.854	-3.4	3.26	4.68	0.296718085	0.067107789	0.259105	0.259221	-2.906655374	-2.909678448	30	10	0	0	0	1	0	1	0	1	0	1	0	0	0	0
AT1G28320.1	516	L	F	NA	NA	NA	NA	ENSVATH04657535	0.025	0	NA	0.053	0.992	-2.272	3.2	-11	0.229038373	0.237384478	1.10386	1.10518	-0.095138993	-0.093950091	19	0	0	1	0	1	0	1	0	1	0	0	0	0	0	0
AT1G28320.1	487	K	E	NA	NA	NA	NA	ENSVATH04657536	0.0125	0	NA	0.015	0.999	-3.733	5.56	8.95	0.770509413	0.752278412	0.196393	0.19646	-5.043457488	-5.047245323	35	0	1	1	1	1	0	1	0	1	1	1	0	1	0	1
AT1G28320.1	426	F	V	NA	NA	NA	NA	ENSVATH04657537	0.0125	0	NA	0.477	0.007	-0.857	2.89	-8.2	0.110184221	0.097812425	1.50455	1.50715	-0.758055267	-0.754425647	8	1	0	0	0	0	0	0	0	1	0	0	0	0	0	0
AT1G28320.1	370	V	I	NA	NA	NA	NA	ENSVATH04657538	0.0125	0	NA	0.999	0.19	0.323	1.57	-1.49	0.102304485	0.010093009	0.506985	0.507221	-1.4040686	-1.406132678	24	14	0	0	0	1	0	0	0	0	0	1	0	0	0	0
AT1G28320.1	267	K	R	NA	NA	NA	NA	ENSVATH04657541	0.025	0	NA	0.536	0	0.371	2.5	-5.19	0.056679992	0.01831348	1.09964	1.10115	-0.107764553	-0.106164475	9	7	0	0	0	0	0	0	0	0	0	0	0	0	0	0
AT1G28320.1	265	L	Q	NA	NA	NA	NA	ENSVATH04657542	0.0125	0	NA	0.129	0.007	0.072	2.05	-3.4	0.142628656	0.147151762	1.18531	1.18627	-0.217908805	-0.216784122	11	0	0	1	0	0	0	0	0	0	0	0	0	0	0	0
AT1G28320.1	259	S	C	NA	NA	NA	NA	ENSVATH04657543	0.0125	0	NA	1	0	6.111	0.99	-1.675	0.003845389	0.142544855	0.746677	0.672411	-0.663654359	-0.442585441	5	28	0	0	0	0	0	0	0	0	0	1	0	0	0	0
AT1G28320.1	88	T	P	NA	NA	NA	NA	ENSVATH04657551	0.0125	0	NA	0.204	0.059	-2.21	5.3	-3.35	0.133017708	0.115063359	0.762819	0.763498	-0.352797045	-0.354485379	10	1	0	0	0	1	0	1	0	1	0	0	0	0	0	0
AT1G28320.1	60	E	G	NA	NA	NA	NA	ENSVATH04657552	0.0125	0	NA	0.322	0.001	-1.65	2.44	-2.1	0.087242882	0.04850629	1.83104	1.83623	-0.906648368	-0.90201427	10	4	0	0	0	0	0	1	0	0	0	1	0	0	0	0
AT1G28320.1	46	A	V	NA	NA	NA	NA	ENSVATH04657553	0.075	0	NA	0	1	-3.65	25.07	8.22	0.871231135	0.853037914	0.0684716	0.0684928	-7.163105851	-7.166737474	38	0	1	1	1	1	0	1	1	1	1	1	0	1	0	1
AT1G28320.1	4	S	A	NA	NA	NA	NA	ENSVATH04657557	0.075	0	NA	0.2	0.61	-0.672	5.22	4.03	0.249587849	0.236089412	0.291267	0.291399	-2.593625053	-2.596231096	11	0	0	0	0	1	0	0	0	1	0	1	0	0	0	0
AT1G28320.1	3	V	L	NA	NA	NA	NA	ENSVATH04657558	0.0125	0	NA	0.982	0	1.619	1.37	-13.4	0.011864923	0.057554884	2.87172	2.88561	-1.444472683	-1.436224738	5	17	0	0	0	0	0	0	0	0	0	0	0	0	0	0
AT1G28320.1	276	C	A	Slightly increased proteolytic activity.	NA	PubMed:18952862	DEG15	SWISSPROT	NA	0	1	NA	0.995	-7.592	24.33	9.275	0.94616343	0.932507964	0.0262464	0.026253	-10.89583395	-10.89991218	40	0	NA	NA	1	1	1	1	1	1	1	1	1	1	1	1
AT1G28320.1	532	C	A	Slightly increased proteolytic activity.	NA	PubMed:18952862	DEG15	SWISSPROT	NA	0	1	NA	0.606	-6.931	15.62	6.21	0.651376253	0.622449858	0.126676	0.126729	-5.336385754	-5.340122765	26	0	NA	NA	0	1	1	1	1	1	0	1	0	1	0	1
AT1G28320.1	392	H	A	Total loss of proteolytic activity.	NA	PubMed:18952862	DEG15	SWISSPROT	NA	0	1	NA	1	-9.667	35.09	10	0.973187679	0.964063878	1.94E-17	1.36E-16	-13.5709522	-13.57637244	42	0	NA	NA	1	1	1	1	1	1	1	1	1	1	1	1
AT1G28320.1	491	D	A	Total loss of proteolytic activity.	NA	PubMed:18952862	DEG15	SWISSPROT	NA	0	1	0	1	-7.867	29.51	10	0.970863193	0.961333845	7.84E-19	7.84E-19	-13.17147222	-13.17651012	42	0	1	1	1	1	1	1	1	1	1	1	1	1	1	1
AT1G28320.1	580	S	A	Total loss of proteolytic activity.	NA	PubMed:18952862	DEG15	SWISSPROT	NA	0	1	NA	1	-2.809	28.89	9.02	0.956400855	0.943341712	1.61E-16	1.61E-16	-12.25036184	-12.25545434	39	0	NA	NA	1	1	0	1	1	1	1	1	1	1	1	1
AT1G28560.1	163	G	R	In srd2-1; temperature sensitive plants with severe suppression of seedling growth and impaired shoot redifferentiation in root explants at 27 degrees Celsius but not at 22 degrees Celsius, however, reduced lateral root formation at any temperature. Loss of reinitiation of the progression of the cell cycle at the restrictive temperature (e.g. 27 degrees Celsius) accompanied with a global reductio…	srd2-1	PubMed:12232244, PubMed:12881506, PubMed:16098103, PubMed:18064403, PubMed:20965997, PubMed:9389671	SRD2	SWISSPROT	NA	0	1	0	1	-7.662	36.52	9.79	0.977088778	0.967271207	4.36E-17	5.61E-16	-15.26433005	-15.36344491	39	0	1	1	1	1	1	1	1	1	1	1	1	1	1	1
AT1G28560.1	371	D	N	NA	NA	NA	NA	ENSVATH04659846	0.0125	0	NA	0.144	1	-4.194	6.86	7.78	0.868883559	0.789455637	0.0603232	0.0603305	-9.936246063	-9.939331995	33	2	0	1	1	1	0	1	0	1	0	1	0	1	0	1
AT1G28560.1	307	R	I	NA	NA	NA	NA	ENSVATH04659847	0.025	0	NA	0.053	0.972	-6.706	12.84	9.07	0.862196408	0.832300464	0.0548919	0.0548997	-9.884831995	-9.887830517	29	0	0	1	0	1	1	1	1	1	1	1	0	1	0	1
AT1G28560.1	265	S	T	NA	NA	NA	NA	ENSVATH04659850	0.025	0	NA	0.627	0.028	-0.247	5.2	5.84	0.195243417	0.084435825	0.211875	0.211932	-3.930365198	-3.933387125	11	5	0	0	0	0	0	0	0	1	0	1	0	0	0	0
AT1G28560.1	250	A	V	NA	NA	NA	NA	ENSVATH04659851	0.0125	0	NA	0.266	0.005	0.394	1.82	-5.2	0.037108618	0.025560894	1.75494	1.75818	-0.851576282	-0.848556599	6	9	0	0	0	0	0	0	0	0	0	0	0	0	0	0
AT1G28560.1	201	H	D	NA	NA	NA	NA	ENSVATH04659852	0.0125	0	NA	0.275	0.858	-2.791	12.72	7.74	0.364966832	0.327225252	0.172464	0.172497	-6.069234806	-6.072268901	8	0	0	0	0	1	0	1	1	1	0	1	0	1	0	1
AT1G28560.1	177	A	P	NA	NA	NA	NA	ENSVATH04659856	0.025	0	NA	0.237	0.001	-1.988	6.91	-1.43	0.108447552	0.089129423	0.456771	0.456112	-1.388891936	-1.385950063	3	1	0	0	0	0	0	1	0	1	0	1	0	0	0	0
AT1G28560.1	79	Q	H	NA	NA	NA	NA	ENSVATH04659861	0.0625	0	NA	0.505	0.581	-3.042	2.45	-4.94	0.189179391	0.165000683	0.689982	0.690439	-0.520348404	-0.521992242	15	1	0	0	0	1	0	1	0	0	0	0	0	0	0	0
AT1G28560.1	18	E	K	NA	NA	NA	NA	ENSVATH04659868	0.025	0	NA	0.29	0.89	-1.793	3.8	-1.72	0.098684856	0.105536626	2.05512	2.07182	-0.480244176	-0.475144509	7	0	0	0	0	1	0	1	0	1	0	1	0	0	0	0
AT1G28560.1	13	S	Y	NA	NA	NA	NA	ENSVATH04659869	0.0125	0	NA	0.075	0.99	-2.534	4.63	-1.115	0.203803241	0.210627783	1.0448	1.04644	-0.030819938	-0.029734969	17	0	0	1	0	1	0	1	0	1	0	1	0	0	0	0
AT1G28560.1	10	D	N	NA	NA	NA	NA	ENSVATH04659870	0.025	0	NA	0.357	0.89	-1.715	1.88	2.01	0.234506724	0.212219533	0.980211	0.986535	-0.0050554	-0.007471224	21	1	0	0	0	1	0	1	0	0	0	1	0	0	0	0
AT1G29260.1	124	T	I	In pex7-2; reduced sensitivity to indole-3-butyric acid and loss of interaction with PEX5 and PST2-cargo.	pex7-2	PubMed:20130089	PEX7	SWISSPROT	NA	0	1	0.025	0.921	-2.497	28.09	-2.25	0.53858131	0.503813195	0.178987	0.17905	-5.595410857	-5.602032197	19	0	1	1	0	1	0	1	1	1	0	0	0	1	0	1
AT1G29260.1	106	A	V	NA	NA	NA	NA	ENSVATH04663735	0.0125	0	NA	0.055	0.159	-1.335	4.67	0.871	0.525208303	0.486954595	0.168931	0.168979	-6.023376781	-6.030118356	17	0	0	1	0	1	0	1	0	1	0	1	0	1	0	1
AT1G29260.1	166	A	V	NA	NA	NA	NA	ENSVATH04663736	0.025	0	NA	0.138	0.607	-2.576	2.97	1.5	0.925400422	0.889271247	0.0614386	0.0614504	-11.59785903	-11.60494458	35	1	0	1	0	1	0	1	0	1	0	1	1	1	0	1
AT1G29260.1	226	R	G	NA	NA	NA	NA	ENSVATH04663740	0.0125	0	NA	0.299	0.003	-3.644	5.5	-7.42	0.96756112	0.955219343	0.0583481	0.0583603	-14.78138311	-14.78138311	36	0	0	0	0	0	0	1	0	1	0	0	1	1	1	1
AT1G29900.1	1014	P	L	In ven3-1; reticulate leaf phenotype.	ven3-1	PubMed:21265888	CARB	SWISSPROT	NA	0	1	0	1	-9.631	26.92	5.46	0.982646636	0.975317914	6.50E-17	6.50E-17	-16	-16	41	0	1	1	1	1	1	1	1	1	0	1	1	1	1	1
AT1G29900.1	149	P	L	In ven3-2; reduced plant size and reticulate leaf phenotype.	ven3-2	PubMed:21265888	CARB	SWISSPROT	NA	0	1	0	1	-9.666	6.04	8.71	0.96555249	0.954358418	0.0247252	0.0247303	-13.0709849	-13.08074561	40	0	1	1	1	1	1	1	0	1	1	1	1	1	1	1
AT1G29900.1	587	G	E	In ven3-3; reticulate leaf phenotype.	ven3-3	PubMed:21265888	CARB	SWISSPROT	NA	0	1	0	1	-7.989	35.36	5.17	0.969961918	0.959162331	2.11E-16	2.77E-16	-14.05750878	-14.06304816	39	0	1	1	1	1	1	1	1	1	0	1	1	1	1	1
AT1G29900.1	844	A	T	In ven3-4; reduced plant size and reticulate leaf phenotype.	ven3-4	PubMed:21265888	CARB	SWISSPROT	NA	0	1	0.063	1	-3.698	25.35	5.46	0.95938676	0.947259601	0.013842	0.0138449	-12.26413693	-12.27056143	40	0	0	1	1	1	0	1	1	1	0	1	1	1	1	1
AT1G29900.1	64	N	K	NA	NA	NA	NA	ENSVATH01125941	0.05	0	NA	0.047	0	-0.102	3.85	-18.1	0.105702536	0.108064353	5.51351	5.60271	-4.085126597	-4.046273643	9	1	0	1	0	0	0	0	0	1	0	0	0	0	0	0
AT1G29900.1	23	P	S	NA	NA	NA	NA	ENSVATH04669189	0.0625	0	NA	0.838	0	0.074	2.42	-9.87	0.184036994	0.161039256	0.731218	0.732468	-0.400056917	-0.403239113	15	1	0	0	0	0	0	0	0	0	0	0	0	0	0	0
AT1G29900.1	90	E	V	NA	NA	NA	NA	ENSVATH04669191	0.0125	0	NA	0.266	0.37	-0.123	7.38	-8.45	0.118202985	0.121960327	1.2932	1.29635	-0.348046834	-0.344318077	8	0	0	0	0	1	0	0	0	1	0	0	0	0	0	0
AT1G29900.1	286	S	L	NA	NA	NA	NA	ENSVATH04669196	0.0125	0	NA	0.161	0.057	-2.885	8.77	1.475	0.320673658	0.329969309	0.218367	0.178667	-4.55941991	-3.818593784	12	0	0	0	0	1	0	1	0	1	0	1	0	1	0	1
AT1G29900.1	383	V	I	NA	NA	NA	NA	ENSVATH04669202	0.0125	0	NA	0.096	0.001	-0.744	1.9	2.82	0.317334591	0.316040521	0.514924	0.515591	-0.928302055	-0.931929223	21	0	0	1	0	0	0	0	0	0	0	1	0	1	0	1
AT1G29900.1	540	I	M	NA	NA	NA	NA	ENSVATH04669211	0.0125	0	NA	0.04	0.157	-0.699	5.68	-19.6	0.377554	0.33907076	0.0764879	0.0765117	-5.880787014	-5.887683283	9	0	0	1	0	1	0	0	0	1	0	0	0	1	0	1
AT1G29900.1	576	T	I	NA	NA	NA	NA	ENSVATH04669212	0.025	0	NA	0.121	0.029	-3.211	7.95	1.63	0.665495912	0.589001977	0.106227	0.106266	-6.529589509	-6.536107011	25	1	0	1	0	0	0	1	0	1	0	1	0	1	0	1
AT1G29900.1	759	A	G	NA	NA	NA	NA	ENSVATH04669220	0.0125	0	NA	0.004	0	-0.656	2.66	-10.8	0.14581931	0.12741282	0.817343	0.818829	-0.214549149	-0.217146281	12	1	1	1	0	0	0	0	0	0	0	0	0	0	0	0
AT1G29900.1	794	K	N	NA	NA	NA	NA	ENSVATH04669221	0.025	0	NA	0.15	0.011	-1.817	10.24	1.08	0.960112469	0.947162793	0.0338276	0.0338347	-13.05922212	-13.06646615	38	0	0	1	0	0	0	1	0	1	0	1	1	1	1	1
AT1G29900.1	942	V	I	NA	NA	NA	NA	ENSVATH04669227	0.025	0	NA	0.746	0.996	-0.682	7.85	4.41	0.946402426	0.932725205	0.0148157	0.0148187	-10.9052285	-10.91090421	40	0	0	0	1	1	0	0	0	1	0	1	1	1	1	1
AT1G29910.1	199	L	K	Loss of targeting to the thylakoid.	NA	PubMed:18621669	LHCB1.1	SWISSPROT	NA	1	1	NA	0.999	-5.432	28.01	3.435	0.981548343	0.973707291	2.05E-17	4.36E-17	-15.26433005	-15.36344491	42	0	NA	NA	1	1	1	1	1	1	0	1	1	1	1	1
AT1G30135.1	9	L	A	Decreased transcriptional repression activity.;	NA	NA	TIFY5A	SWISSPROT	NA	0	1	NA	1	-4.788	4.64	3.7134	0.923130281	0.887195324	0.0426223	0.0426414	-11.07864392	-11.09079765	36	1	NA	NA	1	1	1	1	0	1	0	1	1	1	0	1
AT1G30135.1	10	E	A	Decreased transcriptional repression activity.;	NA	NA	TIFY5A	SWISSPROT	NA	0	1	0.018	1	-5.73	7.08	7.12	0.957599976	0.939957973	0.0380016	0.038019	-15.11569526	-15.18368445	31	0	1	1	1	1	1	1	0	1	0	1	1	1	1	1
AT1G30135.1	12	R	A	Decreased transcriptional repression activity.;	NA	NA	TIFY5A	SWISSPROT	NA	0	1	NA	0.999	-4.218	4.33	0.712	0.471337976	0.359950337	0.216495	0.216705	-4.830810672	-4.845089354	21	2	NA	NA	1	1	0	1	0	1	0	1	0	1	0	1
AT1G30135.1	13	L	A	Decreased transcriptional repression activity.;	NA	NA	TIFY5A	SWISSPROT	NA	0	1	NA	1	-4.606	5.6	6.345	0.950144451	0.935107342	0.0481135	0.0481357	-12.31841327	-12.33300867	37	0	NA	NA	1	1	1	1	0	1	0	1	1	1	1	1
AT1G30135.1	11	L	A	Loss of transcriptional repression activity.;	NA	NA	TIFY5A	SWISSPROT	NA	0	1	NA	1	-4.799	19.15	9.23	0.960228048	0.943905649	0.034306	0.0343202	-15.49208344	-15.49208344	31	0	NA	NA	1	1	1	1	1	1	1	1	1	1	1	1
AT1G30135.1	74	R	G	NA	NA	NA	NA	ENSVATH00051271	0.0125	0	NA	0.032	0.141	-5.685	3.13	-9.11	0.416322264	0.247063596	0.245003	0.245265	-3.937801718	-3.951472744	24	4	1	1	0	1	1	1	0	1	0	0	0	1	0	0
AT1G30135.1	55	C	F	NA	NA	NA	NA	ENSVATH04671833	0.0125	0	NA	0.05	0.013	-8.292	5.02	4	0.712115176	0.681370766	0.199472	0.199626	-6.363512104	-6.377404712	27	0	0	1	0	0	1	1	0	1	0	1	0	1	0	1
AT1G30135.1	83	N	K	NA	NA	NA	NA	ENSVATH04671842	0.0125	0	NA	0.931	0.924	-0.763	5.14	-9.32	0.117978201	0.123290278	1.67034	1.6938	-0.717545566	-0.696780176	8	0	0	0	0	1	0	0	0	1	0	0	0	0	0	0
AT1G30135.1	101	N	K	NA	NA	NA	NA	ENSVATH04671843	0.0375	0	NA	0.271	0.136	-1.781	3.37	-19.4	0.177240087	0.176594275	0.65328	0.656185	-0.559234133	-0.56923501	12	0	0	0	0	1	0	1	0	1	0	0	0	0	0	0
AT1G30135.1	102	P	A	NA	NA	NA	NA	ENSVATH04671844	0.025	0	NA	0.047	0.063	-1.514	2.42	-19.9	0.102284344	0.065724365	1.04498	1.0504	-0.051072837	-0.045545703	11	3	0	1	0	1	0	1	0	0	0	0	0	0	0	0
AT1G30270.1	199	A	V	In lks1-1; enhanced sensitivity to low K(+).	lks1-1	http://www.sciencedirect.com/science/article/pii/S0092867406007690	LKS1	BOTH	NA	1	1	0.001	1	-3.814	35.49	10	0.983859296	0.977064892	2.77E-16	7.84E-19	-16	-16	42	0	1	1	1	1	0	1	1	1	1	1	1	1	1	1
AT1G30270.1	447	L	F	In lks1-2; enhanced sensitivity to low K(+).	lks1-2	http://www.sciencedirect.com/science/article/pii/S0092867406007690	LKS1	BOTH	NA	1	1	0.002	1	-3.445	12.59	0.69	0.975112159	0.966281403	7.84E-19	7.84E-19	-13.91755933	-13.93381203	42	0	1	1	1	1	0	1	1	1	0	1	1	1	1	1
AT1G30270.1	135	F	L	NA	NA	NA	NA	ENSVATH04673546	0.025	1	NA	0	0.999	-5.673	12.82	10	0.983859296	0.977064892	2.00E-17	7.84E-19	-16	-16	42	0	1	1	1	1	1	1	1	1	1	1	1	1	1	1
AT1G30270.1	474	N	K	NA	NA	NA	NA	ENSVATH04673582	0.0625	1	NA	0.772	NA	-0.091	NA	-10.5	0.025906719	0.037876285	8.93155	10	-1.58041265	-1.158962302	5	0	0	0	NA	NA	0	0	NA	NA	0	0	0	0	0	0
AT1G30270.1	475	R	Q	NA	NA	NA	NA	ENSVATH04673583	0.0125	1	NA	0.052	NA	-0.008	NA	-12	0.017696267	0.032199656	10	10	-1.486630557	-1.053842114	3	0	0	1	NA	NA	0	0	NA	NA	0	0	0	0	0	0
AT1G30490.1	40	C	A	Decrease in DNA-binding efficiency.	NA	PubMed:17900520	ATHB-9	SWISSPROT	NA	1	1	NA	1	-7.848	18.3	8.68	0.959854737	0.948260244	0.0430875	0.0431169	-11.99775616	-12.01070462	41	0	NA	NA	1	1	1	1	1	1	1	1	1	1	1	1
AT1G30490.1	75	C	A	Decrease in DNA-binding efficiency.	NA	PubMed:17900520	ATHB-9	SWISSPROT	NA	1	1	NA	0.995	-8.119	4.58	8.465	0.94598826	0.920301402	0.0479462	0.0479826	-11.12501634	-11.13795811	41	1	NA	NA	1	1	1	1	0	1	1	1	1	1	1	1
AT1G30490.1	198	G	D	In phv-1d, phv-2d, phv-3d and phv-4d; constitutively active. Transformation of abaxial leaf fates into adaxial leaf fates.	phv-1d	PubMed:11395776	ATHB-9	SWISSPROT	NA	1	1	0	1	-6.161	5.74	10	0.951499609	0.938876461	0.0242388	0.0242557	-11.05565702	-11.06782314	41	0	1	1	1	1	1	1	0	1	1	1	1	1	1	1
AT1G30490.1	837	S	N	NA	NA	NA	NA	ENSVATH00052210	0.425	1	0	1	0	4.219	0.47	1.87	0.011208751	0.793468001	0.070426	0.0461389	-10.81299002	-9.561139602	3	35	0	0	0	0	0	0	0	0	0	1	0	0	0	1
AT1G30490.1	565	V	I	NA	NA	NA	NA	ENSVATH01130171	0.0375	1	NA	1	0.002	0.047	2	-0.648	0.433364104	0.128773096	0.185421	0.185611	-4.687826877	-4.697601962	31	9	0	0	0	0	0	0	0	0	0	1	0	1	0	0
AT1G30490.1	822	V	L	NA	NA	NA	NA	ENSVATH04676450	0.0125	1	NA	1	0	1.859	1.83	-7.12	0.011642161	0.026871816	0.370943	0.371771	-1.488766562	-1.497280717	11	25	0	0	0	0	0	0	0	0	0	0	0	0	0	0
AT1G30490.1	815	Q	L	NA	NA	NA	NA	ENSVATH04676451	0.05	1	NA	0.004	0.766	-5.032	26.86	8.16	0.902240509	0.883258717	0.070784	0.0708398	-8.951892359	-8.964898568	37	0	1	1	0	1	1	1	1	1	1	1	1	1	0	1
AT1G30490.1	769	I	V	NA	NA	NA	NA	ENSVATH04676453	0.0125	1	NA	0.379	0.012	-0.782	10.17	4.01	0.927298825	0.909658072	0.0256649	0.0256893	-10.41845992	-10.43410852	37	0	0	0	0	0	0	0	0	1	0	1	1	1	1	1
AT1G30490.1	600	P	L	NA	NA	NA	NA	ENSVATH04676461	0.0125	1	NA	0.001	0.992	-8.26	6.83	3.8	0.853352519	0.808274594	0.0939425	0.09403	-7.052887951	-7.064150773	38	1	1	1	0	1	1	1	0	1	0	1	0	1	0	1
AT1G30490.1	597	R	C	NA	NA	NA	NA	ENSVATH04676462	0.0125	1	NA	0.044	0.212	-7.545	18.38	4.34	0.873097785	0.85360837	0.0900875	0.0901696	-7.598623586	-7.610221016	37	0	0	1	0	1	1	1	1	1	0	1	0	1	0	1
AT1G30490.1	306	G	A	NA	NA	NA	NA	ENSVATH04676467	0.0125	1	NA	0.65	0.945	-5.016	3.74	8.91	0.950316325	0.93757126	0.0253394	0.0253577	-10.93821966	-10.95037502	41	0	0	0	0	1	1	1	0	1	1	1	1	1	1	1
AT1G30490.1	301	T	I	NA	NA	NA	NA	ENSVATH04676468	0.0125	1	NA	0.044	0.881	-3.502	14.66	6.81	0.841870403	0.822768347	0.0998494	0.0999347	-6.408730543	-6.420844298	37	0	0	1	0	1	0	1	1	1	0	1	0	1	0	1
AT1G30490.1	274	A	T	NA	NA	NA	NA	ENSVATH04676470	0.0125	1	NA	0.044	0.992	-3.607	6.8	8.91	0.870218465	0.851974762	0.0950393	0.0951203	-7.139101067	-7.150218927	38	0	0	1	0	1	0	1	0	1	1	1	0	1	0	1
AT1G30490.1	254	T	S	NA	NA	NA	NA	ENSVATH04676473	0.0125	1	NA	0.18	0.16	-0.99	2.45	6.805	0.815846467	0.791352437	0.0977198	0.0978006	-6.925362724	-6.937474421	33	0	0	0	0	1	0	0	0	0	0	1	0	1	0	1
AT1G30490.1	110	Q	L	NA	NA	NA	NA	ENSVATH04676477	0.0125	1	NA	0.003	0.992	-5.983	7.91	8.745	0.93048828	0.915566217	0.0727666	0.0728251	-9.658917604	-9.671873095	40	0	1	1	0	1	1	1	0	1	1	1	1	1	1	1
AT1G30490.1	110	Q	K	NA	NA	NA	NA	ENSVATH04676478	0.0125	1	NA	0.008	0.972	-3.396	12.61	8.95	0.93048828	0.915566217	0.0727666	0.0728251	-9.658917604	-9.671873095	40	0	1	1	0	1	0	1	1	1	1	1	1	1	1	1
AT1G30490.1	94	S	G	NA	NA	NA	NA	ENSVATH04676479	0.0125	1	NA	0.002	0.003	-2.565	4.14	-1.5	0.314281705	0.313543531	0.571622	0.573212	-0.911654791	-0.920381061	21	0	1	1	0	0	0	1	0	1	0	1	0	1	0	1
AT1G30620.1	275	G	D	In mur4-1; 50% reduction in L-Ara in cell wall material.;	mur4-1	NA	MUR4	SWISSPROT	NA	1	1	0.106	0.113	-4.825	36.22	8.77	0.920369504	0.90565267	0.0652344	0.0653181	-8.617925278	-8.633741433	41	0	0	1	0	1	1	1	1	1	1	1	1	1	1	1
AT1G30620.1	304	R	Q	In mur4-3; 50% reduction in L-Ara in cell wall material.	mur4-3	NA	MUR4	SWISSPROT	NA	1	1	0	1	-3.675	14.43	1.67	0.949467964	0.937109882	3.90E-16	2.05E-16	-10.48255996	-10.4982549	42	0	1	1	1	1	0	1	1	1	0	1	1	1	1	1
AT1G30620.1	93	E	G	NA	NA	NA	NA	ENSVATH04677589	0.0125	1	NA	0.434	0.068	-2.719	5.64	8.66	0.296248884	0.27768118	0.320129	0.320692	-3.367413147	-3.380911889	12	0	0	0	0	1	0	1	0	1	1	1	0	0	0	0
AT1G30620.1	286	P	S	NA	NA	NA	NA	ENSVATH04677601	0.025	1	NA	0.16	0.059	-3.309	3.35	1.665	0.435159889	0.239036864	0.388745	0.389468	-2.604228181	-2.616552684	31	5	0	0	0	1	0	1	0	1	0	1	0	1	0	0
AT1G30620.1	355	E	G	NA	NA	NA	NA	ENSVATH04677614	0.0125	1	NA	0.132	0.001	-1.685	3.77	3.19	0.125103605	0.124774511	0.754934	0.75702	-0.466398237	-0.473287338	7	0	0	1	0	0	0	1	0	1	0	1	0	0	0	0
AT1G30950.1	4	T	N	NA	NA	NA	NA	ENSVATH01135027	0.1875	0	0	0.092	0	0.156	NA	-5.6	0.025834578	0.104014721	2.47818	0.116751	-0.44669237	-0.363243386	1	7	0	1	0	0	0	0	NA	NA	0	0	0	0	0	0
AT1G30950.1	29	T	I	NA	NA	NA	NA	ENSVATH01135029	0.05	0	NA	0.509	0.993	-0.345	NA	-9.55	0.082334415	0.052591581	1.20954	1.23197	-0.130981372	-0.1199614	8	3	0	0	1	1	0	0	NA	NA	0	0	0	0	0	0
AT1G30950.1	44	G	C	NA	NA	NA	NA	ENSVATH01135030	0.025	0	NA	0.122	0	0.189	2.09	-1.94	0.181667285	0.147718854	0.259043	0.259827	-2.266429611	-2.286211349	8	1	0	1	0	0	0	0	0	0	0	1	0	0	0	0
AT1G30950.1	58	V	I	NA	NA	NA	NA	ENSVATH01135031	0.1875	0	0	1	0.001	-0.221	3.96	-1.67	0.249438365	0.025426242	0.132731	0.115176	-7.19337239	-6.283090595	25	15	0	0	0	0	0	0	0	1	0	1	0	0	0	0
AT1G30950.1	118	G	E	NA	NA	NA	NA	ENSVATH01135038	0.1875	0	0	0.54	0	-1.664	NA	-6.57	0.168129937	0.170937333	0.868487	0.875073	-0.125037188	-0.133514172	13	0	0	0	0	0	0	1	NA	NA	0	0	0	0	0	0
AT1G30950.1	143	S	A	NA	NA	NA	NA	ENSVATH01135041	0.025	0	NA	0.084	0.812	-2.034	4.84	6.56	0.858862709	0.802036201	0.0613803	0.06143	-9.978773064	-9.99744476	30	1	0	1	0	1	0	1	0	1	0	1	0	1	0	1
AT1G30950.1	384	I	M	NA	NA	NA	NA	ENSVATH01135045	0.075	0	NA	0.338	0	0.274	3.53	-19.8	0.082026154	0.041547924	0.179503	0.156345	-5.332187619	-4.542928432	9	13	0	0	0	0	0	0	0	1	0	0	0	0	0	0
AT1G30950.1	408	G	S	NA	NA	NA	NA	ENSVATH01135047	0.075	0	NA	0.095	0.168	-1.007	1.45	-3.49	0.341838608	0.258044809	0.255496	0.256079	-2.336835444	-2.356504883	21	2	0	1	0	1	0	0	0	0	0	0	0	1	0	0
AT1G30950.1	12	L	S	NA	NA	NA	NA	ENSVATH04682668	0.0125	0	NA	0.05	0.014	-1.696	6.14	-1.465	0.224011162	0.213991279	0.316448	0.316815	-1.947144526	-1.958315251	11	0	0	1	0	0	0	1	0	1	0	1	0	0	0	0
AT1G30950.1	39	G	S	NA	NA	NA	NA	ENSVATH04682674	0.075	0	NA	0.67	0.572	0.667	1.49	-8.48	0.14196187	0.101527646	0.488898	0.490623	-1.3514546	-1.36597338	9	2	0	0	0	1	0	0	0	0	0	0	0	0	0	0
AT1G30950.1	96	L	P	NA	NA	NA	NA	ENSVATH04682676	0.0125	0	NA	0.198	0	0.43	3.09	-7.44	0.10937491	0.045824454	0.37473	0.375836	-2.603753563	-2.629137321	6	5	0	0	0	0	0	0	0	1	0	0	0	0	0	0
AT1G30950.1	116	R	T	NA	NA	NA	NA	ENSVATH04682678	0.0125	0	NA	0.133	0	0.776	2.66	-1.44	0.36416325	0.216529211	0.0974074	0.0975043	-7.692501821	-7.716909181	8	3	0	1	0	0	0	0	0	0	0	1	0	1	0	0
AT1G30950.1	177	N	S	NA	NA	NA	NA	ENSVATH04682680	0.0125	0	NA	0	1	-4.594	13.4	9.79	0.979946853	0.971426583	5.41E-18	2.96E-17	-16	-16	39	0	1	1	1	1	1	1	1	1	1	1	1	1	1	1
AT1G30950.1	229	S	C	NA	NA	NA	NA	ENSVATH04682683	0.025	0	NA	0.018	1	-3.02	3.62	0.8995	0.668214989	0.548294684	0.155672	0.155854	-6.850294503	-6.874096031	26	2	1	1	1	1	0	1	0	1	0	1	0	1	0	1
AT1G30950.1	261	V	L	NA	NA	NA	NA	ENSVATH04682684	0.0125	0	NA	0.116	0.223	-1.771	3.14	5.12	0.634819046	0.559222957	0.115962	0.116075	-5.897202819	-5.914638056	25	1	0	1	0	1	0	1	0	1	0	1	0	1	0	1
AT1G30950.1	262	Q	K	NA	NA	NA	NA	ENSVATH04682686	0.025	0	NA	0.916	0.002	-1.05	3.37	-16.9	0.174490468	0.172171751	0.573095	0.576809	-0.732028498	-0.74789246	11	0	0	0	0	0	0	0	0	1	0	0	0	0	0	0
AT1G30950.1	262	Q	R	NA	NA	NA	NA	ENSVATH04682687	0.025	0	NA	0.43	0	-1.273	4.69	-8.1765	0.157400723	0.134075521	0.573095	0.576809	-0.732028498	-0.74789246	11	1	0	0	0	0	0	0	0	1	0	0	0	0	0	0
AT1G30950.1	308	L	V	NA	NA	NA	NA	ENSVATH04682688	0.05	0	NA	0.136	0.347	-2.075	3.7	-2.43	0.445323764	0.077453867	0.0786066	0.0786822	-8.259580453	-8.27709061	26	12	0	1	0	1	0	1	0	1	0	0	0	1	0	0
AT1G30950.1	402	G	S	NA	NA	NA	NA	ENSVATH04682691	0.0125	0	NA	0.657	0.001	-0.968	NA	-3.06	0.141829177	0.101547331	0.258769	0.259982	-0.780876731	-0.795218223	10	2	0	0	0	0	0	0	NA	NA	0	0	0	0	0	0
AT1G30950.1	298	S	A	NA	ufo-14	http://www.pnas.org/content/100/14/8571.full	UFO	MANUAL	NA	0	1	0.012	0.996	-2.7	8.07	6.835	0.889658862	0.866904735	0.0802785	0.0803592	-9.357321749	-9.375686855	34	0	1	1	1	1	0	1	0	1	0	1	0	1	0	1
AT1G30950.1	299	P	L	NA	ufo-6	http://www.sciencedirect.com/science/article/pii/S0960982206000534	UFO	MANUAL	NA	0	1	0	1	-10	10.51	8.175	0.964279165	0.951059606	0.0352877	0.0353094	-14.27424758	-14.29277058	36	0	1	1	1	1	1	1	0	1	1	1	1	1	1	1
AT1G31170.1	94	C	S	Loss of activity.	NA	PubMed:20176891, PubMed:21139087	SRX	SWISSPROT	NA	0	1	0	0.996	-9.14	3.65	7.73	0.957431858	0.918892176	0.0121645	0.0121671	-14.91713567	-14.91713567	35	2	1	1	1	1	1	1	0	1	0	1	1	1	1	1
AT1G31170.1	26	P	L	NA	NA	NA	NA	ENSVATH04686213	0.0125	0	NA	0.082	0.012	-1.692	4.46	4.635	0.411584072	0.311651681	0.154735	0.154803	-3.644513998	-3.651344727	21	2	0	1	0	0	0	1	0	1	0	1	0	1	0	1
AT1G31170.1	47	K	N	NA	NA	NA	NA	ENSVATH04686215	0.025	0	NA	0.375	0.003	-2.535	4.48	3.92	0.917069517	0.8953523	0.0565941	0.056607	-11.16668392	-11.17427342	33	0	0	0	0	0	0	1	0	1	0	1	1	1	0	1
AT1G31170.1	57	S	Y	NA	NA	NA	NA	ENSVATH04686216	0.0125	0	NA	0.025	0.95	-2.956	14.93	4.4361	0.4288525	0.3992785	0.12104	0.121083	-4.510343805	-4.517169277	16	0	1	1	0	1	0	1	1	1	0	1	0	1	0	1
AT1G31170.1	105	L	F	NA	NA	NA	NA	ENSVATH04686220	0.0125	0	NA	0.194	1	-1.515	11.73	7.01	0.937951344	0.920019383	0.0132564	0.0132593	-11.89818421	-11.90514471	35	0	0	0	1	1	0	1	1	1	0	1	1	1	1	1
AT1G31170.1	109	R	H	NA	NA	NA	NA	ENSVATH04686221	0.0125	0	NA	0.02	0.22	-3.361	4.79	8.175	0.936417481	0.919053227	0.0262756	0.0262813	-11.44460927	-11.45141406	36	0	1	1	0	1	0	1	0	1	1	1	1	1	1	1
AT1G31170.1	62	K	Q	Reduced activity.	NA	PubMed:20176891	SRX	SWISSPROT	NA	0	1	0	1	-3.876	14.08	10	0.981344594	0.973441486	6.50E-17	6.50E-17	-16	-16	40	0	1	1	1	1	0	1	1	1	1	1	1	1	1	1
AT1G31360.1	117	K	M	Loss of ATPase or helicase activity.	NA	PubMed:18419780	MED34	SWISSPROT	NA	0	1	0	1	-5.491	17.24	9.93	0.981344594	0.973441486	2.00E-17	4.36E-17	-16	-16	40	0	1	1	1	1	1	1	1	1	1	1	1	1	1	1
AT1G31360.1	70	T	A	NA	NA	NA	NA	ENSVATH00054703	0.175	0	0	0.752	0.019	-0.579	4.67	-19.7	0.088966862	0.056598884	2.93444	2.61857	-2.391447225	-2.863114622	6	3	0	0	0	0	0	0	0	1	0	0	0	0	0	0
AT1G31360.1	95	K	N	NA	NA	NA	NA	ENSVATH00054706	0.125	0	0	0.138	0.08	-1.762	3	-16.3	0.266424142	0.24616423	0.20222	0.202332	-3.604525081	-3.610754155	9	0	0	1	0	1	0	1	0	1	0	0	0	0	0	0
AT1G31360.1	103	T	M	NA	NA	NA	NA	ENSVATH00054709	0.15	0	0	0.002	0.6	-1.635	4.55	5.88	0.258452652	0.256332831	0.155049	0.135792	-6.997212111	-6.128329009	1	0	1	1	0	1	0	1	0	1	0	1	0	0	0	0
AT1G31360.1	283	N	Y	NA	NA	NA	NA	ENSVATH00054727	0.0375	0	NA	0	1	-7.606	14.4	8.72	0.971936813	0.961243724	0.0189845	0.0189878	-14.7531741	-14.7531741	38	0	1	1	1	1	1	1	1	1	1	1	1	1	1	1
AT1G31360.1	349	A	S	NA	NA	NA	NA	ENSVATH00054734	0.1625	0	0	0.512	0.005	-1.042	2.22	-5.1	0.078202488	0.047362407	0.607846	0.60876	-0.654304834	-0.657563501	4	3	0	0	0	0	0	0	0	0	0	0	0	0	0	0
AT1G31360.1	482	K	E	NA	NA	NA	NA	ENSVATH00054749	0.025	0	NA	0.828	0.004	-1.056	5.35	1.31	0.431422612	0.292323758	0.198065	0.19821	-3.955985787	-3.962215058	23	3	0	0	0	0	0	0	0	1	0	1	0	1	0	1
AT1G31360.1	297	L	I	NA	NA	NA	NA	ENSVATH01140414	0.15	0	0	0.148	0	1.194	2.59	-0.437	0.101656959	0.091089337	0.367574	0.303037	-2.187082635	-1.651298027	1	1	0	1	0	0	0	0	0	0	0	1	0	0	0	0
AT1G31360.1	397	Y	F	NA	NA	NA	NA	ENSVATH01140463	0.0375	0	NA	0.241	1	-3.052	6.05	8.28	0.943494369	0.911857147	0.0138779	0.0138805	-13.28629614	-13.29287116	34	1	0	0	1	1	0	1	0	1	1	1	1	1	1	1
AT1G31360.1	416	F	L	NA	NA	NA	NA	ENSVATH01140469	0.1625	0	0	0.332	0.084	-3.791	4.51	8.43	0.538771569	0.367638593	0.0968243	0.0968529	-7.253246736	-7.25963731	19	3	0	0	0	1	0	1	0	1	1	1	0	1	0	1
AT1G31360.1	456	A	S	NA	NA	NA	NA	ENSVATH01140506	0.15	0	0	0.026	0.509	-1.978	2.01	1.98	0.50830465	0.40530142	0.243094	0.243252	-3.490615999	-3.49594256	27	2	1	1	0	1	0	1	0	0	0	1	0	1	0	1
AT1G31360.1	588	L	S	NA	NA	NA	NA	ENSVATH01140575	0.0875	0	NA	0.613	0	2.174	1.59	-10.7	0.025284213	0.083907141	5.33961	4.23198	-3.115295242	-3.821592899	2	9	0	0	0	0	0	0	0	0	0	0	0	0	0	0
AT1G31360.1	641	E	K	NA	NA	NA	NA	ENSVATH01140587	0.0125	0	NA	0.107	0.091	-2.221	3.65	2.17	0.668093574	0.509525151	0.0964979	0.0965323	-6.352127258	-6.359022935	29	3	0	1	0	1	0	1	0	1	0	1	0	1	0	1
AT1G31360.1	684	L	S	NA	NA	NA	NA	ENSVATH01140589	0.275	0	0	0.635	0	1.517	2.25	-1.45	0.043256821	0.138104668	0.42617	0.357054	-1.928541452	-1.462325694	1	8	0	0	0	0	0	0	0	0	0	1	0	0	0	0
AT1G31360.1	7	Q	H	NA	NA	NA	NA	ENSVATH04689122	0.0125	0	NA	0.091	0.761	-1.487	3.27	-18.5	0.118244247	0.120577412	0.963626	0.96637	-0.027015857	-0.029342161	8	0	0	1	0	1	0	1	0	1	0	0	0	0	0	0
AT1G31360.1	65	E	Q	NA	NA	NA	NA	ENSVATH04689139	0.025	0	NA	0.403	0.381	-1.742	5.01	6.13	0.776410552	0.750013975	0.114357	0.114396	-6.49681421	-6.50356717	31	0	0	0	0	1	0	1	0	1	0	1	0	1	0	1
AT1G31360.1	68	S	C	NA	NA	NA	NA	ENSVATH04689140	0.0125	0	NA	0.016	1	-3.983	1.82	3.275	0.774867758	0.754280325	0.158585	0.158641	-5.466020882	-5.471340355	34	0	1	1	1	1	0	1	0	0	0	1	0	1	0	1
AT1G31360.1	100	A	D	NA	NA	NA	NA	ENSVATH04689145	0.0125	0	NA	0.007	0.968	-4.927	26.11	7.44	0.797816252	0.77220096	0.0767063	0.0767244	-6.714258211	-6.720552083	32	0	1	1	0	1	1	1	1	1	0	1	0	1	0	1
AT1G31360.1	126	M	I	NA	NA	NA	NA	ENSVATH04689146	0.0375	0	NA	0.187	0	1.011	1.18	-19.9	0.016119788	0.195620047	0.382005	0.291471	-2.064846057	-1.528987149	2	17	0	0	0	0	0	0	0	0	0	0	0	0	0	0
AT1G31360.1	176	E	D	NA	NA	NA	NA	ENSVATH04689155	0.0125	0	NA	0.64	0.019	-1.578	3.22	-18.8	0.739576923	0.544409963	0.0833063	0.0833324	-7.837292243	-7.844260223	31	4	0	0	0	0	0	1	0	1	0	0	0	1	0	1
AT1G31360.1	206	H	R	NA	NA	NA	NA	ENSVATH04689157	0.0125	0	NA	0.058	0.995	-5.986	7.46	4.24	0.838675111	0.813926115	0.0823454	0.0823689	-7.662672543	-7.670445516	33	0	0	1	1	1	1	1	0	1	0	1	0	1	0	1
AT1G31360.1	282	P	S	NA	NA	NA	NA	ENSVATH04689175	0.0125	0	NA	0.078	1	-7.589	3.02	8.24	0.921168823	0.864585904	0.0382279	0.0382358	-11.53005287	-11.53650567	36	2	0	1	1	1	1	1	0	1	1	1	1	1	0	1
AT1G31360.1	292	S	P	NA	NA	NA	NA	ENSVATH04689180	0.0125	0	NA	1	0.025	-2.543	11.06	4.085	0.77272439	0.755840703	0.156825	0.156884	-4.719053046	-4.723535898	36	0	0	0	0	0	0	1	0	1	0	1	0	1	0	1
AT1G31360.1	301	E	D	NA	NA	NA	NA	ENSVATH04689181	0.0125	0	NA	0.694	0.021	-0.714	3.32	2.48	0.880110024	0.857295577	0.0917672	0.0917915	-8.941395549	-8.948268765	34	0	0	0	0	0	0	0	0	1	0	1	0	1	0	1
AT1G31360.1	315	S	A	NA	NA	NA	NA	ENSVATH04689183	0.025	0	NA	0.018	0.974	-2.583	8	9.215	0.964369263	0.943456576	0.0128392	0.0128416	-13.82136832	-13.82780587	39	1	1	1	0	1	0	1	0	1	1	1	1	1	1	1
AT1G31360.1	360	S	N	NA	NA	NA	NA	ENSVATH04689194	0.0125	0	NA	0.144	0.993	-2.567	5.07	4.38	0.879857205	0.8546646	0.0986525	0.0986857	-9.624517273	-9.632561888	32	0	0	1	1	1	0	1	0	1	0	1	0	1	0	1
AT1G31360.1	449	K	E	NA	NA	NA	NA	ENSVATH04689228	0.0125	0	NA	1	0.936	-2.444	4.17	5.22	0.846094259	0.821320317	0.0742488	0.0742674	-7.916941932	-7.92393511	33	0	0	0	0	1	0	1	0	1	0	1	0	1	0	1
AT1G31360.1	455	S	G	NA	NA	NA	NA	ENSVATH04689229	0.0125	0	NA	0.402	0.003	-0.761	1.72	-7.28	0.159896884	0.045288681	0.501248	0.501866	-1.36069683	-1.365616451	21	8	0	0	0	0	0	0	0	0	0	0	0	0	0	0
AT1G31360.1	459	R	G	NA	NA	NA	NA	ENSVATH04689230	0.0125	0	NA	0.153	0.872	-4.075	3.19	-0.721	0.325020089	0.290149918	0.577513	0.578476	-0.697372571	-0.70127352	24	1	0	1	0	1	0	1	0	1	0	1	0	1	0	1
AT1G31360.1	480	E	D	NA	NA	NA	NA	ENSVATH04689233	0.0125	0	NA	0.538	0.044	-1.298	2.01	-2.97	0.633652032	0.473765599	0.134816	0.134887	-6.024670688	-6.03128689	28	3	0	0	0	1	0	1	0	0	0	0	0	1	0	1
AT1G31360.1	497	V	L	NA	NA	NA	NA	ENSVATH04689242	0.05	0	NA	1	0.001	1.102	1.08	-5.01	0.025704241	0.031027563	0.23208	0.232266	-2.584587569	-2.589568653	10	20	0	0	0	0	0	0	0	0	0	0	0	0	0	0
AT1G31360.1	581	S	F	NA	NA	NA	NA	ENSVATH04689252	0.0125	0	NA	0.024	0.74	-2.663	3.4	-7.355	0.218256057	0.222255935	0.827897	0.829288	-0.224605843	-0.227165806	17	0	1	1	0	1	0	1	0	1	0	0	0	0	0	0
AT1G31360.1	608	I	V	NA	NA	NA	NA	ENSVATH04689255	0.0375	0	NA	0.764	0.128	-0.51	9.3	0.801	0.355912133	0.321050575	0.116562	0.116647	-5.483424966	-5.490460123	9	0	0	0	0	1	0	0	0	1	0	1	0	1	0	1
AT1G31360.1	613	G	E	NA	NA	NA	NA	ENSVATH04689257	0.0125	0	NA	1	0.053	-4.148	4.54	-0.299	0.436851975	0.341101158	0.238741	0.238909	-2.833001856	-2.838105174	25	2	0	0	0	1	0	1	0	1	0	1	0	1	0	1
AT1G31360.1	680	C	Y	NA	NA	NA	NA	ENSVATH04689260	0.05	0	NA	0.303	0.243	-1.561	3.18	-10.7	0.119004204	0.121243831	0.952425	0.954079	-0.050528022	-0.052555494	8	0	0	0	0	1	0	1	0	1	0	0	0	0	0	0
AT1G31360.1	701	G	R	NA	NA	NA	NA	ENSVATH04689261	0.0125	0	NA	0.095	0.15	0.019	5.54	4.33	0.123703288	0.122142319	0.568268	0.551491	-0.971075112	-0.922606656	5	0	0	1	0	1	0	0	0	1	0	1	0	0	0	0
AT1G31360.1	117	K	N	NA	med34	http://onlinelibrary.wiley.com/doi/10.1111/j.1365-313X.2008.03511.x/full	RECQ2	MANUAL	NA	0	1	0	1	-4.472	14.55	3.84	0.981344594	0.973441486	2.00E-17	4.36E-17	-16	-16	40	0	1	1	1	1	1	1	1	1	0	1	1	1	1	1
AT1G31420.2	334	K	R	Loss of kinase activity, normal interaction with ACC synthases.	NA	PubMed:19017745	FEI1	SWISSPROT	NA	1	1	0	1	-2.977	5.21	10	0.96398802	0.9529926	0.0168675	0.0168715	-12.50760284	-12.51353835	41	0	1	1	1	1	0	1	0	1	1	1	1	1	1	1
AT1G31420.2	12	S	L	NA	NA	NA	NA	ENSVATH00054950	0.0125	1	NA	0.781	0.001	0.02	2.19	-8.715	0.10121055	0.034438194	1.42074	1.42226	-0.598086192	-0.595929534	17	7	0	0	0	0	0	0	0	0	0	0	0	0	0	0
AT1G31420.2	39	S	I	NA	NA	NA	NA	ENSVATH00054953	0.75	1	0	0.017	0.989	-3.703	7.78	-1.29	0.478146032	0.46056663	0.272282	0.272496	-3.176840194	-3.182151143	23	0	1	1	0	1	0	1	0	1	0	1	0	1	0	1
AT1G31420.2	116	T	I	NA	NA	NA	NA	ENSVATH00054956	0.025	1	NA	0.165	0.489	-2.131	3.51	6.07	0.147079502	0.141537736	0.417932	0.418335	-1.36550157	-1.369240682	6	0	0	0	0	1	0	1	0	1	0	1	0	0	0	0
AT1G31420.2	142	M	L	NA	NA	NA	NA	ENSVATH00054960	0.0125	1	NA	1	0	0.892	1.49	-9.58	0.023799791	0.048176266	0.541667	0.542572	-1.002516631	-1.007553854	6	15	0	0	0	0	0	0	0	0	0	0	0	0	0	0
AT1G31420.2	168	Q	K	NA	NA	NA	NA	ENSVATH00054964	0.0125	1	NA	1	0	0.814	0.99	6.33	0.018845413	0.130743301	0.151104	0.151181	-5.178056975	-5.182759316	8	26	0	0	0	0	0	0	0	0	0	1	0	0	0	0
AT1G31420.2	8	K	T	NA	NA	NA	NA	ENSVATH04689643	0.0125	1	NA	0	0.921	-1.888	5.77	-4.95	0.29606964	0.293165497	0.520963	0.5215	-1.155350135	-1.158929112	19	0	1	1	0	1	0	1	0	1	0	0	0	0	0	1
AT1G31420.2	15	L	V	NA	NA	NA	NA	ENSVATH04689644	0.025	1	NA	0.453	0.999	-0.969	5.96	-1.4	0.459802256	0.409042716	0.326186	0.326429	-2.085897067	-2.089515937	27	1	0	0	1	1	0	0	0	1	0	1	0	1	0	1
AT1G31420.2	26	E	Q	NA	NA	NA	NA	ENSVATH04689647	0.0125	1	NA	0.541	0.007	-0.302	1.33	-8.92	0.160593749	0.106764392	1.08677	1.0885	-0.099633418	-0.097647854	18	3	0	0	0	0	0	0	0	0	0	0	0	0	0	0
AT1G31420.2	31	S	T	NA	NA	NA	NA	ENSVATH04689649	0.0125	1	NA	0.948	0.019	0.068	2.5	3.1	0.442803875	0.239735549	0.228725	0.228915	-3.291284288	-3.296694002	29	5	0	0	0	0	0	0	0	0	0	1	0	1	0	0
AT1G31420.2	83	Y	H	NA	NA	NA	NA	ENSVATH04689651	0.0375	1	NA	0.473	0.001	-1.323	1.88	-15.5	0.104364328	0.034262394	0.735689	0.736397	-0.439630613	-0.441693518	16	7	0	0	0	0	0	1	0	0	0	0	0	0	0	0
AT1G31420.2	113	A	S	NA	NA	NA	NA	ENSVATH04689655	0.0125	1	NA	0.919	0	0.721	1.39	-9.2335	0.021718844	0.027058541	1.33065	1.32986	-0.405519053	-0.406215667	7	14	0	0	0	0	0	0	0	0	0	0	0	0	0	0
AT1G31420.2	157	T	S	NA	NA	NA	NA	ENSVATH04689674	0.0125	1	NA	0.785	0	0.564	1.19	0.37	0.018530594	0.00815659	0.513885	0.51444	-1.070434972	-1.073974642	14	22	0	0	0	0	0	0	0	0	0	1	0	0	0	0
AT1G31420.2	161	P	S	NA	NA	NA	NA	ENSVATH04689675	0.0125	1	NA	1	0	3.128	1.26	-7.55	0.005270432	0.227545172	1.49978	1.30851	-0.326241143	-0.558696141	1	22	0	0	0	0	0	0	0	0	0	0	0	0	0	0
AT1G31420.2	196	S	F	NA	NA	NA	NA	ENSVATH04689682	0.0125	1	NA	0.054	0.617	-3.059	5.12	-9.1465	0.162132441	0.168203157	1.31478	1.31721	-0.36186831	-0.35914803	13	0	0	1	0	1	0	1	0	1	0	0	0	0	0	0
AT1G31420.2	198	N	K	NA	NA	NA	NA	ENSVATH04689683	0.0125	1	NA	0.714	0.001	-1.007	4.38	1.13	0.165949529	0.159050303	0.42922	0.429654	-1.700170314	-1.704571457	7	0	0	0	0	0	0	0	0	1	0	1	0	0	0	0
AT1G31420.2	526	E	Q	NA	NA	NA	NA	ENSVATH04689711	0.0125	1	NA	0.105	0.751	-2.35	3.72	8.8	0.931300405	0.901117487	0.0362874	0.036297	-10.26755879	-10.27349448	40	1	0	1	0	1	0	1	0	1	1	1	1	1	0	1
AT1G31480.1	446	G	A	In sgr2-3; altered shoot gravitropism.	sgr2-3	http://www.plantcell.org/content/14/1/33.full	SGR2	BOTH	NA	0	1	0	1	-5.762	22.05	9.84	0.962299571	0.950595292	1.36E-16	7.84E-19	-12.61515754	-12.61935287	40	0	1	1	1	1	1	1	1	1	1	1	1	1	1	1
AT1G31480.1	320	G	S	In sgr2-6; altered shoot gravitropism.	sgr2-6	http://www.plantcell.org/content/14/1/33.full	SGR2	BOTH	NA	0	1	0	1	-5.512	4	8.81	0.921291348	0.905096142	0.0452258	0.0452363	-9.358352306	-9.362488156	39	0	1	1	1	1	1	1	0	1	1	1	1	1	1	1
AT1G31480.1	7	H	R	NA	NA	NA	NA	ENSVATH00055181	0.35	0	0	0.124	0	0.087	3.27	-8.865	0.037375771	0.083751847	5.9993	4.86164	-3.617196174	-4.375063345	1	5	0	1	0	0	0	0	0	1	0	0	0	0	0	0
AT1G31480.1	64	V	I	NA	NA	NA	NA	ENSVATH00055185	0.1125	0	0	0.348	0.358	-0.507	1.78	-0.43	0.296255265	0.192895105	0.343633	0.343787	-2.378459189	-2.381199081	20	3	0	0	0	1	0	0	0	0	0	1	0	0	0	0
AT1G31480.1	145	S	R	NA	NA	NA	NA	ENSVATH00055193	0.0625	0	NA	0.252	0.212	-0.348	4.49	-12.3	0.125057963	0.130967813	1.95104	1.95718	-1.282869789	-1.276746334	8	0	0	0	0	1	0	0	0	1	0	0	0	0	0	0
AT1G31480.1	239	S	T	NA	NA	NA	NA	ENSVATH00055200	0.1125	0	0	1	0.003	2.541	1.49	0.23	0.012493302	0.040258867	0.440039	0.440417	-1.427598945	-1.431122711	9	23	0	0	0	0	0	0	0	0	0	1	0	0	0	0
AT1G31480.1	373	S	N	NA	NA	NA	NA	ENSVATH00055206	0.025	0	NA	0.878	0.999	-2.464	3.6	7.74	0.815992338	0.790391038	0.139105	0.139145	-7.321482531	-7.326231937	32	0	0	0	1	1	0	1	0	1	0	1	0	1	0	1
AT1G31480.1	463	P	T	NA	NA	NA	NA	ENSVATH00055210	0.0375	0	NA	0.046	0.977	-6.994	10.03	9.84	0.948184858	0.934134445	0.021384	0.0213885	-11.42435269	-11.42856254	39	0	0	1	0	1	1	1	0	1	1	1	1	1	1	1
AT1G31480.1	508	N	S	NA	NA	NA	NA	ENSVATH00055211	0.1	0	NA	0.686	0.243	-1.094	2.22	-3.72	0.09451122	0.072167657	1.64968	1.6557	-0.67751814	-0.672675811	8	2	0	0	0	1	0	0	0	0	0	0	0	0	0	0
AT1G31480.1	623	L	Q	NA	NA	NA	NA	ENSVATH00055223	0.1125	0	0	0.469	0	4.402	4.21	4.78	0.141456822	0.316158123	0.111377	0.0813102	-7.677780703	-6.627454357	1	7	0	0	0	0	0	0	0	1	0	1	0	0	0	1
AT1G31480.1	692	I	V	NA	NA	NA	NA	ENSVATH00055226	0.0375	0	NA	0.851	0.101	-0.491	4.1	1.19	0.195683981	0.015991624	0.138848	0.138901	-5.515288844	-5.519791775	23	15	0	0	0	1	0	0	0	1	0	1	0	0	0	0
AT1G31480.1	770	A	S	NA	NA	NA	NA	ENSVATH00055232	0.025	0	NA	0.44	0.013	-1.903	4.54	0.09	0.335227563	0.267311842	0.610254	0.611159	-0.49046281	-0.492921699	27	2	0	0	0	0	0	1	0	1	0	1	0	1	0	0
AT1G31480.1	127	V	I	NA	NA	NA	NA	ENSVATH01141848	0.1125	0	0	0.484	0.004	-0.391	3.13	-5.57	0.092002918	0.093141838	0.930769	0.932401	-0.063512899	-0.065280418	4	0	0	0	0	0	0	0	0	1	0	0	0	0	0	0
AT1G31480.1	572	V	G	NA	NA	NA	NA	ENSVATH01141904	0.1125	0	0	0.053	0	1.248	1.12	-6.58	0.004350176	0.200796103	1.33772	1.12373	-0.108918819	-0.312375629	2	24	0	1	0	0	0	0	0	0	0	0	0	0	0	0
AT1G31480.1	640	A	P	NA	NA	NA	NA	ENSVATH01141918	0.1	0	NA	0.204	0	-1.013	6.48	-12.4	0.085708688	0.10993641	7.06869	5.75949	-5.126454461	-5.946629563	3	0	0	0	0	0	0	0	0	1	0	0	0	0	0	0
AT1G31480.1	640	A	V	NA	NA	NA	NA	ENSVATH01141919	0.1125	0	0	0.501	0	0.286	2.41	-12.4	0.042754304	0.060027979	7.06869	5.75949	-5.126454461	-5.946629563	3	6	0	0	0	0	0	0	0	0	0	0	0	0	0	0
AT1G31480.1	802	E	D	NA	NA	NA	NA	ENSVATH01141932	0.0375	0	NA	0.592	0.003	-1.273	3.68	-13.4	0.113083599	0.084175694	0.847406	0.848933	-0.14617529	-0.148189042	10	2	0	0	0	0	0	0	0	1	0	0	0	0	0	0
AT1G31480.1	238	S	P	NA	NA	NA	NA	ENSVATH04690104	0.0125	0	NA	0.053	0.245	-3.897	11.13	4.065	0.708725813	0.693301587	0.221052	0.221133	-3.906837568	-3.910098419	34	0	0	1	0	1	0	1	0	1	0	1	0	1	0	1
AT1G31480.1	244	A	T	NA	NA	NA	NA	ENSVATH04690106	0.025	0	NA	0.133	1	-3.835	6.1	7.36	0.913997743	0.896572808	0.0476015	0.0476127	-9.253725449	-9.257746252	38	0	0	1	1	1	0	1	0	1	0	1	1	1	0	1
AT1G31480.1	257	L	V	NA	NA	NA	NA	ENSVATH04690107	0.0375	0	NA	0.029	1	-2.876	13.34	8.59	0.91286102	0.895308771	0.0263277	0.0263341	-9.166206647	-9.170091146	38	0	1	1	1	1	0	1	1	1	1	1	1	1	0	1
AT1G31480.1	467	D	N	NA	NA	NA	NA	ENSVATH04690140	0.025	0	NA	0.088	0.124	-3.138	7.22	7.51	0.531253293	0.468616178	0.246372	0.246471	-3.691832715	-3.695744348	26	1	0	1	0	1	0	1	0	1	0	1	0	1	0	1
AT1G31480.1	490	C	Y	NA	NA	NA	NA	ENSVATH04690142	0.0125	0	NA	0.851	0.003	-1.725	2.72	-4.07	0.142425952	0.134439762	3.13561	3.15302	-2.327706292	-2.317131402	12	1	0	0	0	0	0	1	0	0	0	0	0	0	0	0
AT1G31480.1	513	T	I	NA	NA	NA	NA	ENSVATH04690143	0.0125	0	NA	0.191	0.01	-0.648	3.67	-6.32	0.126382755	0.132865582	1.85738	1.86386	-0.903434085	-0.898624159	9	0	0	0	0	0	0	0	0	1	0	0	0	0	0	0
AT1G31480.1	514	G	D	NA	NA	NA	NA	ENSVATH04690144	0.0125	0	NA	0.703	0.011	0.037	15.36	-7.24	0.155582144	0.161923263	2.03266	2.03611	-1.858318247	-1.85335732	10	0	0	0	0	0	0	0	1	1	0	0	0	0	0	0
AT1G31480.1	519	T	M	NA	NA	NA	NA	ENSVATH04690145	0.0125	0	NA	0.276	0	0.712	2.59	-12	0.034718475	0.072280124	4.18013	3.53361	-3.280301707	-3.890401207	3	9	0	0	0	0	0	0	0	0	0	0	0	0	0	0
AT1G31480.1	526	V	I	NA	NA	NA	NA	ENSVATH04690146	0.0125	0	NA	0.849	0.003	-0.287	1.28	-12.2	0.135287938	0.104559859	6.63432	6.67769	-6.235010608	-6.212296587	13	3	0	0	0	0	0	0	0	0	0	0	0	0	0	0
AT1G31480.1	544	V	F	NA	NA	NA	NA	ENSVATH04690147	0.0125	0	NA	0.754	0.002	-0.3	3.05	-4.81	0.140442889	0.147159289	1.87444	1.87846	-1.143626422	-1.139590116	10	0	0	0	0	0	0	0	0	1	0	0	0	0	0	0
AT1G31480.1	573	P	Q	NA	NA	NA	NA	ENSVATH04690148	0.0125	0	NA	0.638	0.255	-0.492	2.75	-9.66	0.114717305	0.10479108	2.48541	2.49369	-1.91681641	-1.909706669	8	1	0	0	0	1	0	0	0	0	0	0	0	0	0	0
AT1G31480.1	594	K	E	NA	NA	NA	NA	ENSVATH04690150	0.0125	0	NA	1	0	0.966	1.47	-4.51	0.025958851	0.018463729	1.11861	1.12013	-0.136024998	-0.134283823	8	13	0	0	0	0	0	0	0	0	0	0	0	0	0	0
AT1G31480.1	600	N	D	NA	NA	NA	NA	ENSVATH04690151	0.025	0	NA	0.734	0	0.687	2.18	-3.7	0.061253076	0.004013708	0.407071	0.407328	-1.92157581	-1.924986198	18	16	0	0	0	0	0	0	0	0	0	0	0	0	0	0
AT1G31480.1	627	A	T	NA	NA	NA	NA	ENSVATH04690161	0.0125	0	NA	0.608	0.269	-0.676	2.78	-8.84	0.126961079	0.113874296	1.71231	1.71528	-1.020548146	-1.016842535	10	1	0	0	0	1	0	0	0	0	0	0	0	0	0	0
AT1G31480.1	649	V	L	NA	NA	NA	NA	ENSVATH04690166	0.0125	0	NA	1	0	0.394	1.45	-12.7	0.008829212	0.09913006	1.91843	1.69066	-0.886628288	-1.201351426	4	20	0	0	0	0	0	0	0	0	0	0	0	0	0	0
AT1G31480.1	655	D	Y	NA	NA	NA	NA	ENSVATH04690167	0.0125	0	NA	0.048	0.44	-3.833	4.1	1.6	0.249357698	0.258909105	0.444582	0.392262	-2.129919302	-1.704571457	14	0	0	1	0	1	0	1	0	1	0	1	0	0	0	0
AT1G31480.1	658	T	S	NA	NA	NA	NA	ENSVATH04690168	0.025	0	NA	0.329	0	0.312	5.44	0.69	0.171824688	0.117838774	0.282851	0.282971	-3.255986464	-3.259332622	6	2	0	0	0	0	0	0	0	1	0	1	0	0	0	0
AT1G31480.1	708	A	V	NA	NA	NA	NA	ENSVATH04690178	0.0125	0	NA	0.751	0	3.694	3.18	3.79	0.152405892	0.087906179	0.163016	0.163064	-5.704289991	-5.707903495	5	7	0	0	0	0	0	0	0	1	0	1	0	0	0	0
AT1G31480.1	751	H	Y	NA	NA	NA	NA	ENSVATH04690181	0.0125	0	NA	0.035	1	-5.523	8.33	5.88	0.865387875	0.819106167	0.114861	0.114893	-8.234173541	-8.238938601	36	1	1	1	1	1	1	1	0	1	0	1	0	1	0	1
AT1G31480.1	784	T	K	NA	NA	NA	NA	ENSVATH04690190	0.0125	0	NA	0.968	0.141	-1.803	5	-0.97	0.210756561	0.198029104	0.291775	0.291924	-2.600210367	-2.603577459	8	0	0	0	0	1	0	1	0	1	0	1	0	0	0	0
AT1G31480.1	812	S	P	NA	NA	NA	NA	ENSVATH04690192	0.0125	0	NA	0.01	0	-3.573	14.9	4.695	0.611543037	0.59385355	0.220592	0.220682	-3.59298491	-3.596321949	29	0	1	1	0	0	0	1	1	1	0	1	0	1	0	1
AT1G31480.1	875	N	K	NA	NA	NA	NA	ENSVATH04690197	0.0125	0	NA	0.892	0.512	-1.887	2.75	-1.55	0.154410108	0.155734187	0.770711	0.772159	-0.251428257	-0.253951482	11	0	0	0	0	1	0	1	0	0	0	1	0	0	0	0
AT1G31480.1	878	T	M	NA	NA	NA	NA	ENSVATH04690199	0.1125	0	0	0.093	0	-0.57	2.82	-17.9	0.13139493	0.097525124	5.40093	5.45489	-4.891036042	-4.86911326	13	3	0	1	0	0	0	0	0	0	0	0	0	0	0	0
AT1G31480.1	883	G	R	NA	NA	NA	NA	ENSVATH04690201	0.0125	0	NA	0.009	0.007	-2.745	NA	-1.1	0.048220059	0.019585461	2.48929	2.54775	-0.420919844	-0.411391075	8	6	1	1	0	0	0	1	NA	NA	0	1	0	0	0	0
AT1G31480.1	899	R	S	NA	NA	NA	NA	ENSVATH04690203	0.0125	0	NA	0.76	0.001	-0.993	3.5	-2.01	0.115902904	0.117063456	0.853529	0.85479	-0.160190859	-0.162041181	7	0	0	0	0	0	0	0	0	1	0	1	0	0	0	0
AT1G31480.1	924	A	V	NA	NA	NA	NA	ENSVATH04690206	0.0125	0	NA	0.089	0.181	-1.788	9.83	-3.73	0.128016818	0.125555825	0.546048	0.546607	-0.737601124	-0.74012194	6	0	0	1	0	1	0	1	0	1	0	0	0	0	0	0
AT1G31480.1	927	K	N	NA	NA	NA	NA	ENSVATH04690207	0.0125	0	NA	0.228	0.158	-3.539	5.99	0.0453	0.353348845	0.346867341	0.384856	0.385158	-1.559424635	-1.56282518	21	0	0	0	0	1	0	1	0	1	0	1	0	1	0	1
AT1G31800.1	283	E	K	In lut5-2; decreased activity.	lut5-2	http://www.pnas.org/content/103/9/3474	LUT5	BOTH	NA	0	1	0	1	-3.933	19.98	9.96	0.982646636	0.975317914	7.84E-19	7.84E-19	-16	-16	41	0	1	1	1	1	0	1	1	1	1	1	1	1	1	1
AT1G31800.1	40	E	D	NA	NA	NA	NA	ENSVATH00056456	0.075	0	NA	0.589	0.455	-0.311	NA	-1.2	0.137918524	0.133109505	0.17005	0.172502	-0.408370065	-0.435918911	7	0	0	0	0	1	0	0	NA	NA	0	1	0	0	0	0
AT1G31800.1	2	A	V	NA	NA	NA	NA	ENSVATH04694267	0.025	0	NA	0	0.001	-0.833	3.03	2.24	0.48349125	0.472542444	0.344722	0.345714	-2.300792068	-2.318595028	26	0	1	1	0	0	0	0	0	1	0	1	0	1	0	1
AT1G31800.1	11	P	R	NA	NA	NA	NA	ENSVATH04694268	0.0125	0	NA	0.091	0.997	-0.783	30.42	-1.29	0.38166728	0.373387973	0.361625	0.362762	-1.751987477	-1.765819451	22	0	0	1	1	1	0	0	1	1	0	1	0	1	0	1
AT1G31800.1	44	V	L	NA	NA	NA	NA	ENSVATH04694269	0.025	0	NA	0.649	0.001	-0.731	2.96	-1.3	0.162224195	0.123802576	0.904981	0.911471	-0.08287749	-0.090399046	16	2	0	0	0	0	0	0	0	1	0	1	0	0	0	0
AT1G31800.1	372	M	T	NA	NA	NA	NA	ENSVATH04694291	0.0125	0	NA	0.002	1	-5.588	21.28	9.96	0.977580239	0.968501242	0.025917	0.025938	-15.49208344	-15.49208344	39	0	1	1	1	1	1	1	1	1	1	1	1	1	1	1
AT1G31800.1	482	A	S	NA	NA	NA	NA	ENSVATH04694303	0.0125	0	NA	0.068	0.568	-1.098	5.83	8.355	0.922805031	0.904788242	0.0326397	0.0326632	-10.11985322	-10.13771175	37	0	0	1	0	1	0	0	0	1	1	1	1	1	1	1
AT1G31800.1	563	K	N	NA	NA	NA	NA	ENSVATH04694311	0.0125	0	NA	0.283	0.004	-0.29	2.85	-18.2	0.288439611	0.118394952	0.332	0.335406	-2.809228626	-2.893105687	23	6	0	0	0	0	0	0	0	0	0	0	0	0	0	0
AT1G31800.1	579	P	T	NA	NA	NA	NA	ENSVATH04694312	0.0125	0	NA	0.014	0.282	-0.761	3.29	-6.6	0.142393685	0.137771875	0.520618	0.521836	-1.28018496	-1.290976096	6	0	1	1	0	1	0	0	0	1	0	0	0	0	0	0
AT1G31930.1	423	N	T	NA	NA	NA	NA	ENSVATH00057130	0.0125	0	NA	0.117	0.976	-2.237	5.59	8.97	0.842589351	0.805730187	0.0565508	0.0565813	-10.52309884	-10.53770684	25	0	0	1	0	1	0	1	0	1	1	1	0	1	0	1
AT1G31930.1	167	R	K	NA	NA	NA	NA	ENSVATH01147905	0.1625	0	0	0.939	0	0.682	0.84	0.508	0.027725768	0.0647457	0.346398	0.34791	-2.103210971	-2.130151316	6	16	0	0	0	0	0	0	0	0	0	1	0	0	0	0
AT1G31930.1	182	A	G	NA	NA	NA	NA	ENSVATH01147906	0.15	0	0	0.808	0	2.319	1.32	7.61	0.074066818	0.091579003	0.100827	0.100899	-6.592757002	-6.604869389	8	17	0	0	0	0	0	0	0	0	0	1	0	0	0	0
AT1G31930.1	229	S	C	NA	NA	NA	NA	ENSVATH01147907	0.1625	0	0	0.077	0.961	-2.977	2.72	3.455	0.32202518	0.32846208	0.776174	0.780128	-0.2448656	-0.250605381	24	0	0	1	0	1	0	1	0	0	0	1	0	1	0	1
AT1G31930.1	786	I	M	NA	NA	NA	NA	ENSVATH01147971	0.225	0	0	0.067	0	-1.384	3.48	-0.0707	0.243347952	0.236241492	0.384754	0.385797	-1.485488108	-1.49572628	14	0	0	1	0	0	0	1	0	1	0	1	0	0	0	0
AT1G31930.1	63	P	L	NA	NA	NA	NA	ENSVATH04695821	0.025	0	NA	0.006	1	-2.473	13.01	6.945	0.871063345	0.846412015	0.0506742	0.0507156	-8.851742913	-8.864803689	33	0	1	1	1	1	0	1	1	1	0	1	0	1	0	1
AT1G31930.1	80	G	V	NA	NA	NA	NA	ENSVATH04695823	0.0125	0	NA	0.178	1	0.645	1.91	-4.29	0.042632443	0.019668332	0.814918	0.816815	-0.272001104	-0.276089747	7	9	0	0	1	1	0	0	0	0	0	0	0	0	0	0
AT1G31930.1	102	G	D	NA	NA	NA	NA	ENSVATH04695825	0.0125	0	NA	0.259	1	-0.854	4.98	4.28	0.163550222	0.050272346	0.185939	0.186162	-3.699434948	-3.710714357	12	7	0	0	1	1	0	0	0	1	0	1	0	0	0	0
AT1G31930.1	161	C	S	NA	NA	NA	NA	ENSVATH04695830	0.0125	0	NA	0.465	0.067	0.169	4.34	5.28	0.240327233	0.220676489	0.218412	0.218655	-3.658233204	-3.669825764	7	0	0	0	0	1	0	0	0	1	0	1	0	0	0	0
AT1G31930.1	407	Q	H	NA	NA	NA	NA	ENSVATH04695847	0.0125	0	NA	0.156	0.974	-0.511	2.68	-2.04	0.687597205	0.657953163	0.13623	0.13633	-5.758824721	-5.770712452	27	0	0	1	0	1	0	0	0	0	0	1	0	1	0	1
AT1G31930.1	419	A	V	NA	NA	NA	NA	ENSVATH04695849	0.0125	0	NA	1	0	-1.93	4.28	2.09	0.137415785	0.146783871	0.176258	0.149895	-5.272816736	-4.454932987	2	4	0	0	0	0	0	1	0	1	0	1	0	0	0	0
AT1G31930.1	501	A	V	NA	NA	NA	NA	ENSVATH04695852	0.0875	0	NA	0.517	0.233	-0.935	4.03	3.43	0.178196687	0.168327912	0.23082	0.231292	-1.904203206	-1.915881492	7	0	0	0	0	1	0	0	0	1	0	1	0	0	0	0
AT1G31930.1	510	E	D	NA	NA	NA	NA	ENSVATH04695854	0.025	0	NA	0.554	0.944	-0.293	4.67	-3.8	0.177067313	0.170721378	0.353983	0.355013	-1.298371581	-1.309271571	9	0	0	0	0	1	0	0	0	1	0	0	0	0	0	0
AT1G31930.1	654	L	V	NA	NA	NA	NA	ENSVATH04695860	0.025	0	NA	0.08	0.944	-2.659	25.8	6.79	0.96609028	0.954634466	7.84E-19	4.26E-17	-13.08541622	-13.13314107	40	0	0	1	0	1	0	1	1	1	0	1	1	1	1	1
AT1G31930.1	802	A	S	NA	NA	NA	NA	ENSVATH04695862	0.0625	0	NA	0.711	0.203	-0.333	2.55	2.695	0.165156879	0.15789493	0.362515	0.363289	-1.603809374	-1.613622333	7	0	0	0	0	1	0	0	0	0	0	1	0	0	0	0
AT1G31930.1	444	S	N	Strongly reduces GTP-binding and GTPase activity.	NA	PubMed:22232549	XLG3	SWISSPROT	NA	0	1	0.071	0.958	-2.877	14.09	10	0.982646636	0.975317914	7.84E-19	7.84E-19	-16	-16	41	0	0	1	0	1	0	1	1	1	1	1	1	1	1	1
AT1G32070.2	136	K	E	Complete loss of interaction with CaLCuV NSP protein.	NA	PubMed:16461385	NSI	SWISSPROT	NA	0	1	0.038	1	-3.857	11.36	8.88	0.971541864	0.961066033	0.0315744	0.0315803	-14.34285902	-14.35360902	39	0	0	1	1	1	0	1	1	1	1	1	1	1	1	1
AT1G32070.2	194	D	G	Complete loss of interaction with CaLCuV NSP protein.	NA	PubMed:16461385	NSI	SWISSPROT	NA	0	1	0.019	1	-6.951	20.85	10	0.983859296	0.977064892	7.84E-19	6.50E-17	-16	-16	42	0	1	1	1	1	1	1	1	1	1	1	1	1	1	1
AT1G32070.2	107	I	T	Complete loss of interaction with CaLCuV NSP protein.	NA	PubMed:16461385	NSI	SWISSPROT	NA	0	1	0.002	1	-4.781	11.55	8.69	0.962065565	0.949446442	0.0344128	0.0344197	-13.30437913	-13.31123502	38	0	1	1	1	1	1	1	1	1	1	1	1	1	1	1
AT1G32070.2	154	M	R	NA	NA	NA	NA	ENSVATH00057828	0.0125	0	NA	0.699	0	2.697	1.43	-2.53	0.01723691	0.08547212	0.302193	0.303302	-1.305627364	-1.315195916	5	18	0	0	0	0	0	0	0	0	0	0	0	0	0	0
AT1G32070.2	35	F	Y	NA	NA	NA	NA	ENSVATH00057832	0.0875	0	NA	1	0.001	0.393	1.84	-16.4	0.026614705	0.027359654	2.58054	2.26731	-1.578619858	-2.003896108	7	13	0	0	0	0	0	0	0	0	0	0	0	0	0	0
AT1G32070.2	235	V	L	NA	NA	NA	NA	ENSVATH04697841	0.0125	0	NA	0.083	0.929	-2.457	6.11	5.44	0.888947647	0.820237361	0.055645	0.0556569	-9.778843807	-9.784705937	36	2	0	1	0	1	0	1	0	1	0	1	0	1	0	1
AT1G32070.2	169	E	Q	NA	NA	NA	NA	ENSVATH04697849	0.025	0	NA	0.478	0.004	-0.657	7.27	8.99	0.875439968	0.638803059	0.0445596	0.0460889	-12.57277039	-12.85425369	32	6	0	0	0	0	0	0	0	1	1	1	0	1	0	1
AT1G32070.2	167	D	N	NA	NA	NA	NA	ENSVATH04697850	0.0875	0	NA	0.488	0.001	-1.118	NA	-0.683	0.056487635	0.183682643	0.0404092	7.84E-19	-3.833211822	-1.826519444	1	7	0	0	0	0	0	0	NA	NA	0	1	0	0	0	0
AT1G32070.2	104	V	I	NA	NA	NA	NA	ENSVATH04697867	0.0125	0	NA	0.471	0.004	0.023	0.92	-10.6	0.023775901	0.03865517	0.318839	0.267856	-2.65295896	-2.065917863	9	19	0	0	0	0	0	0	0	0	0	0	0	0	0	0
AT1G32070.2	79	D	E	NA	NA	NA	NA	ENSVATH04697870	0.0125	0	NA	1	0	1.222	1.54	-8.64	0.01025531	0.084091875	0.728648	0.625993	-0.669543611	-0.419874817	5	20	0	0	0	0	0	0	0	0	0	0	0	0	0	0
AT1G32070.2	78	N	D	NA	NA	NA	NA	ENSVATH04697871	0.0125	0	NA	0.619	0	0.778	NA	0	0.083065667	0.082442885	0.420823	0.219985	0	-0.084833997	1	0	0	0	0	0	0	0	NA	NA	0	1	0	0	0	0
AT1G32070.2	45	K	R	NA	NA	NA	NA	ENSVATH04697876	0.0125	0	NA	0.051	0.014	-1.177	1.81	3.23	0.562655868	0.498498798	0.184116	0.184215	-3.877839846	-3.88412001	27	1	0	1	0	0	0	0	0	0	0	1	0	1	0	1
AT1G32070.2	30	F	L	NA	NA	NA	NA	ENSVATH04697880	0.0125	0	NA	1	0	0.254	3.67	-2.25	0.054128011	0.048202014	0.686048	0.675843	-0.407668879	-0.391820685	3	5	0	0	0	0	0	0	0	1	0	0	0	0	0	0
AT1G32070.2	19	N	H	NA	NA	NA	NA	ENSVATH04697881	0.0125	0	NA	0.132	NA	0.089	1.72	-9.31	0.084574978	0.05725054	3.42498	3.46629	-3.104823956	-3.075523775	6	3	0	1	NA	NA	0	0	0	0	0	0	0	0	0	0
AT1G32070.2	4	I	T	NA	NA	NA	NA	ENSVATH04697885	0.0125	0	NA	0.078	NA	-0.404	2.4	-11.8	0.092826776	0.073147787	2.57942	2.63808	-1.506734392	-1.473693037	8	2	0	1	NA	NA	0	0	0	0	0	0	0	0	0	0
AT1G32150.1	18	T	I	NA	NA	NA	NA	ENSVATH00058220	0.0125	1	NA	0.047	NA	-0.924	7.86	-1.59	0.090198612	0.098557133	0.786691	0.553544	-0.496440821	-0.169333076	3	0	0	1	NA	NA	0	0	0	1	0	1	0	0	0	0
AT1G32150.1	278	V	L	NA	NA	NA	NA	ENSVATH00058224	0.0125	1	NA	0.186	0.529	-1.273	2.99	-19.9	0.107337071	0.037050791	1.6304	1.6339	-0.763601312	-0.759777844	18	7	0	0	0	1	0	0	0	1	0	0	0	0	0	0
AT1G32150.1	125	A	T	NA	NA	NA	NA	ENSVATH01150660	0.0125	1	NA	0.349	0.203	-1.847	4.85	2.01	0.38566153	0.34994055	0.592619	0.593468	-0.575250631	-0.577920912	28	1	0	0	0	1	0	1	0	1	0	1	0	1	0	1
AT1G32150.1	142	S	F	NA	NA	NA	NA	ENSVATH01150661	0.0625	1	NA	0.026	0.988	-4.573	5.37	2.385	0.53125259	0.531106643	0.444124	0.444573	-1.238564591	-1.241568064	32	0	1	1	0	1	1	1	0	1	0	1	0	1	0	1
AT1G32150.1	11	K	N	NA	NA	NA	NA	ENSVATH04698564	0.0125	1	NA	0.008	NA	-3.471	9.8	-5.43	0.758707036	0.736944794	0.120633	0.120681	-5.351711239	-5.356666771	33	0	1	1	NA	NA	0	1	0	1	0	0	0	1	0	1
AT1G32150.1	19	P	L	NA	NA	NA	NA	ENSVATH04698565	0.0125	1	NA	0.024	NA	-3.49	7.58	-0.31	0.258573419	0.2331587	0.851931	0.853455	-0.143837451	-0.145785686	22	1	1	1	NA	NA	0	1	0	1	0	1	0	0	0	0
AT1G32150.1	107	P	S	NA	NA	NA	NA	ENSVATH04698575	0.0125	1	NA	0.154	0.924	-6.685	3.73	6.145	0.662764508	0.648899048	0.179692	0.179782	-3.212312873	-3.21635293	33	0	0	1	0	1	1	1	0	1	0	1	0	1	0	1
AT1G32150.1	134	V	A	NA	NA	NA	NA	ENSVATH04698580	0.0125	1	NA	0.808	0.001	2.112	4.86	-8.56	0.048435349	0.061521599	0.784677	0.779942	-0.293100518	-0.283520864	2	5	0	0	0	0	0	0	0	1	0	0	0	0	0	0
AT1G32150.1	211	G	R	NA	NA	NA	NA	ENSVATH04698585	0.0125	1	NA	0.08	0.017	-1.968	12.68	5.55	0.725228622	0.713850738	0.153396	0.153508	-3.18778341	-3.192043735	37	0	0	1	0	0	0	1	1	1	0	1	0	1	0	1
AT1G32150.1	228	P	L	NA	NA	NA	NA	ENSVATH04698591	0.0125	1	NA	0.401	0.005	-0.52	5.37	3.805	0.187678881	0.178610983	0.345618	0.34607	-1.973981821	-1.978434475	8	0	0	0	0	0	0	0	0	1	0	1	0	0	0	0
AT1G32150.1	366	P	S	NA	NA	NA	NA	ENSVATH04698600	0.0125	1	NA	0.905	0.922	-4.019	3.39	-7.445	0.179804144	0.141898194	1.57967	1.58345	-0.634031188	-0.630275907	18	2	0	0	0	1	0	1	0	1	0	0	0	0	0	0
AT1G32150.1	374	D	G	NA	NA	NA	NA	ENSVATH04698602	0.0125	1	NA	0.421	0.253	0.115	2.17	-2.33	0.07842184	0.026658732	2.05779	2.06554	-1.283904796	-1.276418737	13	7	0	0	0	1	0	0	0	0	0	0	0	0	0	0
AT1G32150.1	320	C	L	Significantly increases DNA binding activity.	NA	PubMed:22718771	BZIP68	SWISSPROT	NA	1	1	NA	0.489	-8.85	3.88	6.28	0.803648086	0.786741097	0.173886	0.173954	-5.258334803	-5.262688062	37	0	NA	NA	0	1	1	1	0	1	0	1	0	1	0	1
AT1G32150.1	182	C	L	Slightly increases DNA binding activity.	NA	PubMed:22718771	BZIP68	SWISSPROT	NA	1	1	NA	0.218	-0.364	4.04	2.95	0.144921775	0.142572936	0.542108	0.542994	-0.715706909	-0.718843865	8	0	NA	NA	0	1	0	0	0	1	0	1	0	0	0	0
AT1G32640.1	328	T	A	Jasmonate-insensitive phenotype and increased stability of the protein.	NA	PubMed:23593022	MYC2	SWISSPROT	NA	0	1	0.781	0	0.203	3.29	-18.3	0.090583182	0.058395504	1.38318	1.39243	-0.441081531	-0.431031309	9	3	0	0	0	0	0	0	0	1	0	0	0	0	0	0
AT1G32640.1	237	P	L	NA	NA	NA	NA	ENSVATH01157263	0.075	0	NA	1	0	5.408	1.81	1.035	0.056404699	0.246638373	0.142716	0.142702	-5.852036302	-5.850085341	3	15	0	0	0	0	0	0	0	0	0	1	0	0	0	0
AT1G32640.1	623	G	S	NA	NA	NA	NA	ENSVATH04704373	0.0125	0	NA	0	0.995	-4.162	2.22	7.78	0.784685191	0.666191966	0.0656923	0.0657236	-10.57774512	-10.59344279	23	2	1	1	1	1	0	1	0	0	0	1	0	1	0	1
AT1G32640.1	467	R	S	NA	NA	NA	NA	ENSVATH04704389	0.0125	0	NA	0.003	0.996	-5.502	20.35	3.45	0.970218606	0.958556713	0.0190159	0.0190206	-14.78138311	-14.81155246	37	0	1	1	1	1	1	1	1	1	0	1	1	1	1	1
AT1G32640.1	404	D	E	NA	NA	NA	NA	ENSVATH04704396	0.0125	0	NA	1	0.019	0.093	1.22	-11	0.149493507	0.128011654	0.0453779	0.0453995	-13.11391895	-13.13118047	13	25	0	0	0	0	0	0	0	0	0	0	0	0	0	0
AT1G32640.1	400	V	I	NA	NA	NA	NA	ENSVATH04704399	0.0125	0	NA	0.489	0	-0.684	4.64	8.11	0.545561141	0.472470032	0.0534927	0.0535199	-10.76464581	-10.77933762	4	0	0	0	0	0	0	0	0	1	1	1	0	1	0	1
AT1G32640.1	397	R	K	NA	NA	NA	NA	ENSVATH04704401	0.0125	0	NA	0.426	0	-0.346	2.2	1.2	0.609564064	0.307940368	0.107253	0.0924353	-11.25489162	-10.2476104	21	7	0	0	0	0	0	0	0	0	0	1	0	1	0	1
AT1G32640.1	387	G	S	NA	NA	NA	NA	ENSVATH04704402	0.0125	0	NA	0.334	0.746	-2.737	4.88	6.31	0.683478927	0.645012407	0.11169	0.11177	-7.02049533	-7.035541894	23	0	0	0	0	1	0	1	0	1	0	1	0	1	0	1
AT1G32640.1	344	T	I	NA	NA	NA	NA	ENSVATH04704406	0.0125	0	NA	0.412	0.009	0.094	1.92	2.28	0.305424821	0.265254295	0.125783	0.125818	-6.837686565	-6.842370999	2	0	0	0	0	0	0	0	0	0	0	1	0	1	0	0
AT1G32640.1	342	N	S	NA	NA	NA	NA	ENSVATH04704407	0.0125	0	NA	0.812	0	-0.854	4.91	5.43	0.436139815	0.301167995	0.101587	0.10165	-8.874216265	-8.892508475	7	2	0	0	0	0	0	0	0	1	0	1	0	1	0	1
AT1G32640.1	294	G	S	NA	NA	NA	NA	ENSVATH04704411	0.0125	0	NA	0.981	0.905	0.495	1.69	-11.4	0.07870961	0.050087207	1.21257	1.21977	-0.246470561	-0.238390109	7	3	0	0	0	1	0	0	0	0	0	0	0	0	0	0
AT1G32640.1	214	V	G	NA	NA	NA	NA	ENSVATH04704416	0.0125	0	NA	0.485	0.006	-3.409	3.39	3.85	0.225868441	0.166866376	0.359286	0.362666	-1.099907738	-1.138044044	17	2	0	0	0	0	0	1	0	1	0	1	0	0	0	0
AT1G32640.1	122	S	I	NA	NA	NA	NA	ENSVATH04704426	0.0125	0	NA	0.204	0.012	-2.331	6.78	-0.0623	0.253578354	0.251313922	0.51658	0.519017	-0.832210221	-0.845314373	17	0	0	0	0	0	0	1	0	1	0	1	0	0	0	0
AT1G32640.1	66	E	D	NA	NA	NA	NA	ENSVATH04704428	0.0125	0	NA	0.806	0.014	-1.187	2.78	-6.64	0.685469343	0.195601239	0.05664	0.056671	-12.67335082	-12.69121369	25	11	0	0	0	0	0	0	0	0	0	0	0	1	0	0
AT1G32640.1	19	A	S	NA	NA	NA	NA	ENSVATH04704430	0.0125	0	NA	0.293	0.412	-0.887	4.22	6.895	0.771290399	0.618937659	0.064966	0.0650005	-9.070393551	-9.085613945	28	3	0	0	0	1	0	0	0	1	0	1	0	1	0	1
AT1G32640.1	5	R	Q	NA	NA	NA	NA	ENSVATH04704431	0.0125	0	NA	0.244	0.754	-2.243	3.45	1.335	0.40627797	0.300849225	0.122656	0.122785	-4.537808716	-4.55117469	18	2	0	0	0	1	0	1	0	1	0	1	0	1	0	1
AT1G32900.1	486	E	A	Loss of activity.	NA	PubMed:25710501	GBSS1	SWISSPROT	NA	0	1	0	1	-4.941	24.45	10	0.983859296	0.977064892	2.11E-16	3.68E-17	-16	-16	42	0	1	1	1	1	1	1	1	1	1	1	1	1	1	1
AT1G32900.1	51	N	K	NA	NA	NA	NA	ENSVATH00060633	0.15	0	0	0.938	0	0.966	2.45	-7.73	0.045039686	0.069839422	1.81453	1.46001	-0.372157091	-0.683842969	1	4	0	0	0	0	0	0	0	0	0	0	0	0	0	0
AT1G32900.1	68	R	G	NA	NA	NA	NA	ENSVATH01160061	0.15	0	0	0.291	0	-0.462	2.52	-7.7	0.046995792	0.043693697	1.06898	0.935606	-0.066145388	-0.064274131	3	5	0	0	0	0	0	0	0	0	0	0	0	0	0	0
AT1G32900.1	66	S	L	NA	NA	NA	NA	ENSVATH01160062	0.15	0	0	0.328	0	-0.013	2.95	-12.75	0.189936743	0.200964257	2.32245	2.33045	-1.889090578	-1.881127092	14	0	0	0	0	0	0	0	0	1	0	0	0	0	0	0
AT1G32900.1	20	H	Q	NA	NA	NA	NA	ENSVATH01160065	0.0375	0	NA	0.617	0.756	-0.367	2.03	-14.1	0.098199259	0.090865758	2.55804	2.69083	-0.842939325	-0.821837759	9	1	0	0	0	1	0	0	0	0	0	0	0	0	0	0
AT1G32900.1	9	N	H	NA	NA	NA	NA	ENSVATH01160066	0.1875	0	0	0.929	0	1.666	1.36	3.02	0.023432024	0.338435996	0.18683	0.157148	-5.077752165	-4.280287629	2	19	0	0	0	0	0	0	0	0	0	1	0	0	0	1
AT1G32900.1	535	P	R	NA	NA	NA	NA	ENSVATH04707331	0.0125	0	NA	0.107	0.979	-4.709	10.06	5.61	0.930704504	0.915054196	0.0484261	0.0484418	-10.00050712	-10.00855772	39	0	0	1	0	1	1	1	0	1	0	1	1	1	1	1
AT1G32900.1	467	P	S	NA	NA	NA	NA	ENSVATH04707337	0.0125	0	NA	0.044	0.552	-6.089	3.83	7.685	0.920261707	0.865592348	0.0578734	0.0578905	-10.80047245	-10.80843162	38	2	0	1	0	1	1	1	0	1	0	1	1	1	0	1
AT1G32900.1	458	A	G	NA	NA	NA	NA	ENSVATH04707338	0.0125	0	NA	0.005	0.999	-3.335	7.3	3.66	0.853109473	0.832672648	0.119999	0.120044	-7.183996134	-7.191321213	36	0	1	1	1	1	0	1	0	1	0	1	0	1	0	1
AT1G32900.1	431	V	L	NA	NA	NA	NA	ENSVATH04707342	0.0125	0	NA	0.022	0.339	-2.352	8.75	6.06	0.876580025	0.834371766	0.0903692	0.0904005	-7.985525661	-7.992414362	38	1	1	1	0	1	0	1	0	1	0	1	0	1	0	1
AT1G32900.1	430	N	S	NA	NA	NA	NA	ENSVATH04707343	0.0375	0	NA	0.015	0.975	-3.757	7.99	10	0.745572438	0.718936275	0.157765	0.157845	-6.087352894	-6.096223827	30	0	1	1	0	1	0	1	0	1	1	1	0	1	0	1
AT1G32900.1	403	V	F	NA	NA	NA	NA	ENSVATH04707344	0.0125	0	NA	0.005	0.993	-2.63	8.29	-14	0.583444573	0.568310938	0.210718	0.210844	-3.034182348	-3.04044873	29	0	1	1	1	1	0	1	0	1	0	0	0	1	0	1
AT1G32900.1	394	G	E	NA	NA	NA	NA	ENSVATH04707345	0.0125	0	NA	0.001	1	-7.034	28.02	8.78	0.96090948	0.949491013	0.032786	0.0327955	-12.12311045	-12.13040515	41	0	1	1	1	1	1	1	1	1	1	1	1	1	1	1
AT1G32900.1	256	M	I	NA	NA	NA	NA	ENSVATH04707356	0.075	0	NA	0.209	0	-1.436	3.54	-13.1	0.185436862	0.181622308	0.489821	0.49094	-1.007200025	-1.014692558	11	0	0	0	0	0	0	1	0	1	0	0	0	0	0	0
AT1G32900.1	208	E	K	NA	NA	NA	NA	ENSVATH04707363	0.0125	0	NA	0.034	0.936	-2.995	5.55	8.96	0.950239584	0.936447719	0.053567	0.0535836	-11.64980045	-11.65878317	39	0	1	1	0	1	0	1	0	1	1	1	1	1	1	1
AT1G32900.1	173	A	S	NA	NA	NA	NA	ENSVATH04707370	0.0125	0	NA	0.184	0.014	0.462	4.91	7.365	0.711677497	0.64346581	0.0550599	0.0550751	-12.07618835	-12.08395738	10	0	0	0	0	0	0	0	0	1	0	1	0	1	0	1
AT1G32900.1	146	D	E	NA	NA	NA	NA	ENSVATH04707372	0.0125	0	NA	0.092	0.495	-2.354	4.75	-11.6	0.944449337	0.900848173	0.0467696	0.0467828	-12.59954145	-12.60884427	38	2	0	1	0	1	0	1	0	1	0	0	1	1	0	1
AT1G32900.1	77	K	R	NA	NA	NA	NA	ENSVATH04707375	0.0125	0	NA	0.519	0.471	-0.537	1.64	-12.8	0.191784643	0.146930451	0.808125	0.809952	-0.255222912	-0.258924863	18	2	0	0	0	1	0	0	0	0	0	0	0	0	0	0
AT1G32900.1	37	S	P	NA	NA	NA	NA	ENSVATH04707377	0.0125	0	NA	0.287	0.001	-1.054	4.71	-19.3	0.148403936	0.136877182	2.52637	2.54336	-1.969699895	-1.956374474	12	1	0	0	0	0	0	0	0	1	0	0	0	0	0	0
AT1G32900.1	29	A	S	NA	NA	NA	NA	ENSVATH04707378	0.1875	0	0	0.86	0	-0.043	1.29	-10.565	0.01457434	0.04033944	0.788021	0.697318	-0.510512613	-0.296297742	7	18	0	0	0	0	0	0	0	0	0	0	0	0	0	0
AT1G32900.1	28	V	L	NA	NA	NA	NA	ENSVATH04707380	0.1875	0	0	0.614	0	0.84	0.95	-14.5	0.002227689	0.388283976	0.723496	0.604091	-0.658880181	-0.393658411	1	30	0	0	0	0	0	0	0	0	0	0	0	0	0	1
AT1G32900.1	27	D	N	NA	NA	NA	NA	ENSVATH04707381	0.0125	0	NA	0.734	0.107	1.158	1.37	-5.2	0.02586959	0.054116036	2.27988	2.30199	-1.47445766	-1.456495663	4	11	0	0	0	1	0	0	0	0	0	0	0	0	0	0
AT1G32900.1	452	E	K	No effect on activity, but loss of interaction with PTST.	NA	PubMed:25710501	GBSS1	SWISSPROT	NA	0	1	0.873	0.002	-0.414	3.29	-8.44	0.0958905	0.061448182	1.08892	1.0918	-0.100427346	-0.097270084	10	3	0	0	0	0	0	0	0	1	0	0	0	0	0	0
AT1G32900.1	441	K	E	No effect on activity, but reduced interaction with PTST.	NA	PubMed:25710501	GBSS1	SWISSPROT	NA	0	1	0.376	0.765	-3.534	9.38	8.75	0.958304129	0.945580437	0.0524974	0.0525137	-12.51479976	-12.52388603	39	0	0	0	0	1	0	1	0	1	1	1	1	1	1	1
AT1G32900.1	449	E	K	No effect on activity, but reduced interaction with PTST.	NA	PubMed:25710501	GBSS1	SWISSPROT	NA	0	1	0.61	0.07	-1.443	3.85	-5.85	0.32771132	0.313311612	0.345928	0.346233	-2.70689611	-2.713664808	16	0	0	0	0	1	0	1	0	1	0	0	0	1	0	1
AT1G35290.1	64	D	A	Loss of catalytic activity.	NA	PubMed:24214063	ALT1	SWISSPROT	NA	1	1	0.003	1	-7.949	29.51	10	0.981344594	0.973441486	7.84E-19	2.77E-16	-16	-16	40	0	1	1	1	1	1	1	1	1	1	1	1	1	1	1
AT1G35290.1	8	V	A	NA	NA	NA	NA	ENSVATH00066631	0.925	1	NA	1	0	1.138	2.35	-6.18	0.018855725	0.080735324	2.89867	2.5993	-1.613595573	-2.039108926	3	13	0	0	0	0	0	0	0	0	0	0	0	0	0	0
AT1G35290.1	101	E	K	NA	NA	NA	NA	ENSVATH01190861	0.0125	1	NA	0.896	0.054	-2.927	4.55	4.43	0.525515559	0.482162222	0.109793	0.109977	-6.272348963	-6.323460935	16	0	0	0	0	1	0	1	0	1	0	1	0	1	0	1
AT1G35290.1	178	F	L	NA	NA	NA	NA	ENSVATH04741242	0.0125	1	NA	1	0.089	-2.642	3.41	0.289	0.114580339	0.010535155	0.136612	0.136973	-3.322720717	-3.366403295	19	14	0	0	0	1	0	1	0	1	0	1	0	0	0	0
AT1G35290.1	164	R	M	NA	NA	NA	NA	ENSVATH04741243	0.0125	1	NA	0.066	0.446	-1.892	5.56	3.84	0.295022343	0.293315108	0.104788	0.0904246	-7.938223425	-6.935122894	1	0	0	1	0	1	0	1	0	1	0	1	0	0	0	1
AT1G35290.1	163	K	N	NA	NA	NA	NA	ENSVATH04741244	0.0125	1	NA	0.523	0.021	-1.863	4.22	3.59	0.794874224	0.622100344	0.068469	0.0559195	-11.04881067	-9.860608667	31	5	0	0	0	0	0	1	0	1	0	1	0	1	0	1
AT1G35290.1	124	V	L	NA	NA	NA	NA	ENSVATH04741253	0.025	1	NA	0.029	0.516	-2.4	9	6.25	0.910907837	0.848023518	0.0324967	0.0325303	-11.21299744	-11.25101546	35	2	1	1	0	1	0	1	0	1	0	1	1	1	0	1
AT1G35290.1	122	F	C	NA	NA	NA	NA	ENSVATH04741254	0.0125	1	NA	0.001	1	-7.378	17.91	9.9	0.979946853	0.971426583	7.84E-19	7.84E-19	-16	-16	39	0	1	1	1	1	1	1	1	1	1	1	1	1	1	1
AT1G35290.1	111	K	T	NA	NA	NA	NA	ENSVATH04741260	0.0125	1	NA	0.051	0.998	-5.698	27.99	10	0.981344594	0.973441486	2.05E-17	7.84E-19	-16	-16	40	0	0	1	1	1	1	1	1	1	1	1	1	1	1	1
AT1G35290.1	102	A	T	NA	NA	NA	NA	ENSVATH04741263	0.0125	1	NA	0.268	0.804	-3.558	10.35	6.5	0.837035255	0.797515148	0.0439344	0.0439844	-10.63705031	-10.67698316	24	0	0	0	0	1	0	1	0	1	0	1	0	1	0	1
AT1G35290.1	90	G	S	NA	NA	NA	NA	ENSVATH04741265	0.0125	1	NA	0.006	0.967	-5.522	7.5	10	0.981344594	0.973441486	4.36E-17	4.36E-17	-16	-16	40	0	1	1	0	1	1	1	0	1	1	1	1	1	1	1
AT1G35290.1	67	G	R	NA	NA	NA	NA	ENSVATH04741271	0.0125	1	NA	0.002	1	-7.922	36.46	8.97	0.977653157	0.968573343	0.0097119	0.00972075	-15.49208344	-15.49208344	39	0	1	1	1	1	1	1	1	1	1	1	1	1	1	1
AT1G35290.1	33	T	N	NA	NA	NA	NA	ENSVATH04741279	0.0125	1	NA	0.037	0.023	-1.814	1.95	-1.49	0.09788774	0.085941561	1.0848	1.10491	-0.096552953	-0.077978181	7	1	1	1	0	0	0	1	0	0	0	1	0	0	0	0
AT1G35290.1	25	I	F	NA	NA	NA	NA	ENSVATH04741280	0.0125	1	NA	0.711	0.003	-1.747	2.01	-15	0.070001708	0.067026688	4.2147	4.6861	-3.007551645	-2.754687252	3	1	0	0	0	0	0	1	0	0	0	0	0	0	0	0
AT1G35670.1	306	F	A	Constitutive activity.	NA	PubMed:16438971	CPK11	SWISSPROT	NA	1	1	NA	1	-7.593	14.24	9.43	0.982609349	0.975280563	0.0106225	0.0106269	-16	-16	41	0	NA	NA	1	1	1	1	1	1	1	1	1	1	1	1
AT1G35670.1	150	D	A	Loss of activity.	NA	PubMed:16438971	CPK11	SWISSPROT	NA	1	1	0	1	-7.861	29.51	10	0.983859296	0.977064892	2.13E-17	6.50E-17	-16	-16	42	0	1	1	1	1	1	1	1	1	1	1	1	1	1	1
AT1G35670.1	171	D	A	Loss of activity.	NA	PubMed:16438971	CPK11	SWISSPROT	NA	1	1	0.001	1	-7.804	29.51	10	0.983859296	0.977064892	6.50E-17	5.97E-18	-16	-16	42	0	1	1	1	1	1	1	1	1	1	1	1	1	1	1
AT1G35670.1	13	T	S	NA	NA	NA	NA	ENSVATH01200157	0.85	1	0	1	0	1.228	1.23	-14.65	0.048643181	0.006841003	1.49085	1.5053	-0.563978959	-0.549484545	15	12	0	0	0	0	0	0	0	0	0	0	0	0	0	0
AT1G35670.1	9	R	H	NA	NA	NA	NA	ENSVATH04751496	0.0125	1	NA	0.113	0.611	-1.064	2.47	-12.645	0.186487958	0.169094339	1.41172	1.40984	-0.436233039	-0.444467848	17	1	0	1	0	1	0	0	0	0	0	0	0	0	0	0
AT1G35670.1	163	D	N	NA	NA	NA	NA	ENSVATH04751501	0.0125	1	NA	0.025	0.261	-2.634	3.28	8.77	0.381060983	0.392910082	0.145982	0.11771	-5.552824907	-4.646397251	13	0	1	1	0	1	0	1	0	1	1	1	0	1	0	1
AT1G35670.1	255	E	D	NA	NA	NA	NA	ENSVATH04751522	0.0125	1	NA	0.818	0	0.549	1.41	-20	0.076201548	0.003436094	0.106056	0.106147	-5.491219876	-5.508681738	20	22	0	0	0	0	0	0	0	0	0	0	0	0	0	0
AT1G35670.1	494	D	N	NA	NA	NA	NA	ENSVATH04751542	0.0125	1	NA	0.404	0	0.166	NA	-3.52	0.116220169	0.118862486	1.04764	1.08563	-0.032935727	-0.018668946	8	0	0	0	0	0	0	0	NA	NA	0	0	0	0	0	0
AT1G35720.1	40	H	A	Loss of peroxidase activity.	NA	PubMed:16153598	ANN1	SWISSPROT	NA	1	1	NA	0.994	-8.61	35.09	10	0.983859296	0.977064892	7.84E-19	7.84E-19	-16	-16	42	0	NA	NA	1	1	1	1	1	1	1	1	1	1	1	1
AT1G35720.1	52	A	T	NA	NA	NA	NA	ENSVATH01201442	0.0375	1	NA	0.356	0	0.416	3.52	-8.26	0.034848041	0.001977461	0.486619	0.488945	-0.96001909	-0.968006138	18	19	0	0	0	0	0	0	0	1	0	0	0	0	0	0
AT1G35720.1	25	E	Q	NA	NA	NA	NA	ENSVATH04752117	0.0125	1	NA	0.898	0	-0.097	1.62	-20	0.032853262	0.015838232	1.07206	1.07675	-0.073075968	-0.068543655	8	11	0	0	0	0	0	0	0	0	0	0	0	0	0	0
AT1G35720.1	51	Q	H	NA	NA	NA	NA	ENSVATH04752135	0.1	1	NA	0.04	0.001	-2.324	4.31	-5.74	0.392156968	0.377222453	0.238674	0.238934	-2.532935287	-2.543231748	20	0	0	1	0	0	0	1	0	1	0	0	0	1	0	1
AT1G35720.1	201	I	V	NA	NA	NA	NA	ENSVATH04752139	0.0125	1	NA	0.005	0.002	-0.792	5.12	-6.45	0.59022455	0.416151526	0.0719905	0.0720243	-7.514546896	-7.526289734	21	3	1	1	0	0	0	0	0	1	0	0	0	1	0	1
AT1G35720.1	288	N	K	NA	NA	NA	NA	ENSVATH04752147	0.0125	1	NA	0.295	0.998	-5.148	7.49	1.97	0.925922219	0.908335497	0.0688739	0.0689034	-10.36759839	-10.3810069	37	0	0	0	1	1	1	1	0	1	0	1	1	1	1	1
AT1G35720.1	301	R	C	NA	NA	NA	NA	ENSVATH04752148	0.0125	1	NA	0.004	0.938	-1.326	5.09	-9.68	0.124617891	0.127860854	1.04909	1.05322	-0.050336815	-0.04641957	9	0	1	1	0	1	0	1	0	1	0	0	0	0	0	0
AT1G36160.1	1588	E	K	In pas3-1; developmental phenotype and reduced levels of very long chain fatty acids in seeds.	pas3-1	PubMed:15088065	ACC1	SWISSPROT	NA	1	1	0.003	0.604	-3.686	19.98	9.95	0.950504785	0.937594656	2.11E-16	2.30E-16	-10.92088752	-10.94470961	41	0	1	1	0	1	0	1	1	1	1	1	1	1	1	1
AT1G36160.1	1787	G	S	In pas3-2; developmental phenotype and reduced levels of very long chain fatty acids in seeds.	pas3-2	PubMed:15088065	ACC1	SWISSPROT	NA	1	1	0	1	-5.683	7.5	9.95	0.943171414	0.929572482	5.61E-16	5.61E-16	-10.24057241	-10.26258708	41	0	1	1	1	1	1	1	0	1	1	1	1	1	1	1
AT1G36160.1	1103	E	D	NA	NA	NA	NA	ENSVATH00070678	0.6125	1	0	0.703	0.766	-1.881	6.56	3.05	0.764903947	0.748211433	0.190043	0.190472	-4.529898359	-4.549755512	36	0	0	0	0	1	0	1	0	1	0	1	0	1	0	1
AT1G36160.1	1119	P	H	NA	NA	NA	NA	ENSVATH00070679	1	1	NA	0.182	0	-0.329	NA	-1.2	0.031319766	0.029179119	10	10	-3.292698148	-5.054604788	1	1	0	0	0	0	0	0	NA	NA	0	1	0	0	0	0
AT1G36160.1	1582	L	V	NA	NA	NA	NA	ENSVATH00070692	0.325	1	0	0.612	0.056	-1.171	9.24	2.64	0.483783416	0.447728593	0.191768	0.19201	-5.607915359	-5.621353223	16	0	0	0	0	1	0	0	0	1	0	1	0	1	0	1
AT1G36160.1	2084	I	V	NA	NA	NA	NA	ENSVATH00070702	0.325	1	0	0.235	0.037	-0.664	2.11	8.87	0.87341732	0.831592928	0.0644714	0.0645875	-7.465864698	-7.487897541	39	1	0	0	0	0	0	0	0	0	1	1	0	1	0	1
AT1G36160.1	2173	D	V	NA	NA	NA	NA	ENSVATH00070705	0.325	1	0	0.069	0	-2.611	14.39	5.91	0.204254878	0.212704936	1.25174	1.30819	-0.296785168	-0.241671847	17	0	0	1	0	0	0	1	1	1	0	1	0	0	0	0
AT1G36160.1	32	R	G	NA	NA	NA	NA	ENSVATH01212884	0.325	1	0	1	0	5.878	0.28	7.77	0.003661183	0.837106287	0.0668381	0.0324691	-8.045757486	-6.713121567	1	38	0	0	0	0	0	0	0	0	0	1	0	0	0	1
AT1G36160.1	391	I	L	NA	NA	NA	NA	ENSVATH01212928	0.0125	1	NA	0.006	1	-1.815	10.38	8.78	0.929965898	0.914681891	0.026804	0.0268488	-9.563884921	-9.590061638	40	0	1	1	1	1	0	1	0	1	1	1	1	1	1	1
AT1G36160.1	412	V	A	NA	NA	NA	NA	ENSVATH01212929	0.1875	1	0	0.183	0	-2.038	3.89	1.75	0.143560162	0.09246518	0.797935	0.802755	-0.226905028	-0.235187469	15	3	0	0	0	0	0	1	0	1	0	1	0	0	0	0
AT1G36160.1	1099	L	I	NA	NA	NA	NA	ENSVATH01212976	0.325	1	0	1	0	1.06	1.12	5.95	0.003184374	0.667684528	0.163476	0.12285	-5.522232128	-4.651706822	2	36	0	0	0	0	0	0	0	0	0	1	0	0	0	1
AT1G36160.1	1130	R	H	NA	NA	NA	NA	ENSVATH01212977	0.325	1	0	0.198	0	1.229	1.44	3.47	0.020436822	0.050886349	0.37016	0.371179	-2.298498503	-2.313906491	8	20	0	0	0	0	0	0	0	0	0	1	0	0	0	0
AT1G36160.1	1386	P	L	NA	NA	NA	NA	ENSVATH01212988	0.1875	1	0	0.053	0.984	-4.548	12.04	8.97	0.893954072	0.87760712	0.0620337	0.0621366	-7.478294563	-7.499686664	40	0	0	1	0	1	1	1	1	1	1	1	1	1	0	1
AT1G36160.1	1691	S	P	NA	NA	NA	NA	ENSVATH01212997	0.6125	1	0	0.106	0	-0.408	4.06	-1.6685	0.035985084	0.02494255	2.04684	1.76917	-0.728044609	-0.979982808	6	9	0	1	0	0	0	0	0	1	0	1	0	0	0	0
AT1G36160.1	1693	G	A	NA	NA	NA	NA	ENSVATH01212998	0.0375	1	NA	0.04	0.995	-5.448	22.05	9.95	0.939106667	0.924947924	2.05E-16	5.61E-16	-9.880338057	-9.919427262	41	0	0	1	1	1	1	1	1	1	1	1	1	1	1	1
AT1G36160.1	2126	G	S	NA	NA	NA	NA	ENSVATH01213023	0.0125	1	NA	0.448	0	1.033	1.67	3.57	0.083557576	0.053210082	1.11679	1.12647	-0.11497481	-0.105975411	8	3	0	0	0	0	0	0	0	0	0	1	0	0	0	0
AT1G36160.1	2132	Y	H	NA	NA	NA	NA	ENSVATH01213025	0.325	1	0	0	0.998	-4.243	16.42	9.95	0.831063451	0.812136576	0.107203	0.107392	-6.040143758	-6.058456767	37	0	1	1	1	1	0	1	1	1	1	1	0	1	0	1
AT1G36160.1	2161	S	A	NA	NA	NA	NA	ENSVATH01213029	0.325	1	0	1	0	1.948	0.97	7.74	0.002910687	0.764133211	0.141933	0.103824	-6.07209044	-5.13169008	1	37	0	0	0	0	0	0	0	0	0	1	0	0	0	1
AT1G36160.1	2163	R	G	NA	NA	NA	NA	ENSVATH01213030	0.325	1	0	0.381	0	0.286	3.65	7.62	0.056862781	0.173437822	0.310181	0.261741	-3.271879257	-2.696331014	1	8	0	0	0	0	0	0	0	1	0	1	0	0	0	0
AT1G36160.1	2236	K	M	NA	NA	NA	NA	ENSVATH01213032	0.025	1	NA	0.169	0.997	-3.496	15.1	8.87	0.8728662	0.854170108	0.0899388	0.0901429	-7.227283792	-7.255881552	38	0	0	0	1	1	0	1	1	1	1	1	0	1	0	1
AT1G36160.1	76	A	T	NA	NA	NA	NA	ENSVATH04767013	0.0625	1	NA	0.006	1	-3.561	33.24	9.94	0.940849008	0.927053929	2.05E-16	5.61E-16	-10.04177451	-10.06380959	41	0	1	1	1	1	0	1	1	1	1	1	1	1	1	1
AT1G36160.1	415	P	L	NA	NA	NA	NA	ENSVATH04767030	0.05	1	NA	0.045	0.163	-4.4	14.42	6.115	0.754797439	0.741023649	0.231506	0.232017	-3.968228093	-3.98622773	37	0	0	1	0	1	0	1	1	1	0	1	0	1	0	1
AT1G36160.1	664	D	G	NA	NA	NA	NA	ENSVATH04767043	0.0125	1	NA	0.244	0.235	-4.231	9.99	8.78	0.916089103	0.8821564	0.0272698	0.0273139	-9.227580661	-9.252780054	40	1	0	0	0	1	0	1	0	1	1	1	1	1	0	1
AT1G36160.1	835	M	I	NA	NA	NA	NA	ENSVATH04767049	0.0125	1	NA	0.171	0.004	-1.008	8.49	3.26	0.228201375	0.210398241	0.271877	0.272802	-3.380394379	-3.405151293	7	0	0	0	0	0	0	0	0	1	0	1	0	0	0	0
AT1G36160.1	1064	D	E	NA	NA	NA	NA	ENSVATH04767057	0.0125	1	NA	0.005	0.973	-3.528	7.77	6.87	0.889387187	0.871905402	0.0648664	0.0649902	-7.60205999	-7.625783393	39	0	1	1	0	1	0	1	0	1	0	1	0	1	0	1
AT1G36160.1	1170	L	F	NA	NA	NA	NA	ENSVATH04767065	0.025	1	NA	0.05	0	-0.971	3.91	-6.47	0.117038036	0.119935874	1.04832	1.05198	-0.060769874	-0.056434756	8	0	0	1	0	0	0	0	0	1	0	0	0	0	0	0
AT1G36160.1	1253	V	I	NA	NA	NA	NA	ENSVATH04767067	0.0125	1	NA	0.182	0.006	-0.857	4.04	7.83	0.124153612	0.123768916	0.728472	0.73175	-0.39850061	-0.407139573	7	0	0	0	0	0	0	0	0	1	0	1	0	0	0	0
AT1G36160.1	1570	P	L	NA	NA	NA	NA	ENSVATH04767079	0.0125	1	NA	0.054	0.003	-6.799	4.75	3.28	0.301574437	0.261554384	0.428698	0.430432	-1.411402274	-1.426296604	20	1	0	1	0	0	1	1	0	1	0	1	0	0	0	0
AT1G36160.1	1592	G	R	NA	NA	NA	NA	ENSVATH04767080	0.0125	1	NA	0	1	-7.578	36.52	9.95	0.938567707	0.924603346	1.61E-16	7.84E-19	-9.854321692	-9.87554762	41	0	1	1	1	1	1	1	1	1	1	1	1	1	1	1
AT1G36160.1	1705	K	E	NA	NA	NA	NA	ENSVATH04767083	0.025	1	NA	0.61	0.015	-2.543	7.07	8.91	0.868058558	0.849546098	0.0992673	0.0994672	-7.041961983	-7.065501548	38	0	0	0	0	0	0	1	0	1	1	1	0	1	0	1
AT1G36160.1	1823	V	L	NA	NA	NA	NA	ENSVATH04767087	0.0125	1	NA	0.357	0	-0.935	3.13	-7.12	0.182018945	0.189858984	1.41052	1.43288	-0.435234545	-0.415501424	15	0	0	0	0	0	0	0	0	1	0	0	0	0	0	0
AT1G36160.1	1823	V	A	NA	NA	NA	NA	ENSVATH04767088	0.0375	1	NA	0.504	0	-1.866	5.32	1.72	0.133145804	0.088171303	1.41052	1.43288	-0.435234545	-0.415501424	15	3	0	0	0	0	0	1	0	1	0	1	0	0	0	0
AT1G36160.1	2146	K	R	NA	NA	NA	NA	ENSVATH04767096	0.0125	1	NA	0.487	0.001	-1.072	2.46	6.36	0.683594827	0.580570821	0.184837	0.185228	-4.79784148	-4.819378154	33	2	0	0	0	0	0	0	0	0	0	1	0	1	0	1
AT1G36160.1	2148	V	I	NA	NA	NA	NA	ENSVATH04767097	0.0125	1	NA	1	0	-0.097	2.92	-0.242	0.165017922	0.02791978	0.315571	0.316553	-2.048020259	-2.062797663	24	11	0	0	0	0	0	0	0	1	0	1	0	0	0	0
AT1G36160.1	2195	V	A	NA	NA	NA	NA	ENSVATH04767098	0.0125	1	NA	0.81	0	0.861	3.37	0.23	0.098227339	0.086206591	1.0889	1.09479	-0.106493454	-0.099870569	7	1	0	0	0	0	0	0	0	1	0	1	0	0	0	0
AT1G36160.1	231	G	D	NA	acc1-3	http://www.plantphysiol.org/content/157/3/1079.full	ACC1	MANUAL	NA	1	1	0	0.999	-6.158	35.86	9.71	0.936765367	0.921967397	5.61E-16	5.61E-16	-10.05380377	-10.07580965	40	0	1	1	1	1	1	1	1	1	1	1	1	1	1	1
AT1G36160.1	86	E	K	NA	gsd1	http://www.plantphysiol.org/content/157/3/1079.full	ACC1	MANUAL	NA	1	1	0.005	1	-3.501	18.25	9.94	0.926382226	0.910923254	0.0285609	0.0286061	-9.317167369	-9.340398373	40	0	1	1	1	1	0	1	1	1	1	1	1	1	1	1
AT1G43700.1	79	S	A	Cytoplasmic and nuclear.	NA	PubMed:17947581	VIP1	SWISSPROT	NA	0	1	0.716	0.006	0.272	2.53	-5.62	0.096680689	0.053457883	1.36543	1.37606	-0.302013483	-0.294344081	12	4	0	0	0	0	0	0	0	0	0	0	0	0	0	0
AT1G43700.1	212	K	R	Impaired VIP1 response elements (VREs) DNA-binding and altered subsequent transcription activation.	NA	PubMed:19820165	VIP1	SWISSPROT	NA	0	1	0	1	-2.978	8.51	10	0.975964584	0.967035052	0.0201423	0.0201482	-14.45078945	-14.46462106	41	0	1	1	1	1	0	1	0	1	1	1	1	1	1	1
AT1G43700.1	70	Q	P	NA	NA	NA	NA	ENSVATH01275686	0.1625	0	0	0.275	0	0.962	NA	-1.52	0.072225884	0.07482696	1.17132	0.964139	-0.017743696	-0.097640785	1	0	0	0	0	0	0	0	NA	NA	0	1	0	0	0	0
AT1G43700.1	98	S	P	NA	NA	NA	NA	ENSVATH01275692	0.025	0	NA	0.231	0	-0.209	NA	-8.05	0.03092105	0.079148138	0.971034	0.591034	-0.386259631	-0.012310502	2	8	0	0	0	0	0	0	NA	NA	0	0	0	0	0	0
AT1G43700.1	131	F	S	NA	NA	NA	NA	ENSVATH01275694	0.0125	0	NA	0.886	0.083	1.209	2.76	-10.085	0.123428125	0.083383956	2.12907	2.15422	-1.062255993	-1.04427618	14	3	0	0	0	1	0	0	0	0	0	0	0	0	0	0
AT1G43700.1	132	I	L	NA	NA	NA	NA	ENSVATH01275695	0.2875	0	0	0.724	0	0.081	3.39	-1.77	0.066115042	0.057222259	1.57153	1.33042	-0.340428902	-0.616069795	1	1	0	0	0	0	0	0	0	1	0	1	0	0	0	0
AT1G43700.1	260	R	Q	NA	NA	NA	NA	ENSVATH01275726	0.025	0	NA	0.009	0.99	-3.439	4.43	5.1	0.86423964	0.821624927	0.0582302	0.0582527	-7.09563939	-7.105284725	39	1	1	1	0	1	0	1	0	1	0	1	0	1	0	1
AT1G43700.1	40	S	P	NA	NA	NA	NA	ENSVATH04848356	0.0125	0	NA	0.064	0.858	-0.755	33.97	4.865	0.559741693	0.494763593	0.027085	0.027095	-9.633479734	-9.644389312	8	0	0	1	0	1	0	0	1	1	0	1	0	1	0	1
AT1G43700.1	82	S	T	NA	NA	NA	NA	ENSVATH04848358	0.0125	0	NA	0.642	0.08	-0.495	3.1	-9.87	0.107891024	0.07461092	3.1125	3.16601	-1.993610982	-1.967433616	12	3	0	0	0	1	0	0	0	1	0	0	0	0	0	0
AT1G43700.1	108	G	D	NA	NA	NA	NA	ENSVATH04848359	0.025	0	NA	0.062	0.473	-2.585	6.85	-2.82	0.26181421	0.269402579	0.930086	0.933091	-0.063165682	-0.066388718	21	0	0	1	0	1	0	1	0	1	0	0	0	0	0	0
AT1G43700.1	311	A	V	NA	NA	NA	NA	ENSVATH04848395	0.0125	0	NA	0.254	0.004	-0.987	4.75	2.95	0.141613725	0.146707288	1.28626	1.29173	-0.280098868	-0.27491284	11	0	0	0	0	0	0	0	0	1	0	1	0	0	0	0
AT1G43700.1	314	Q	K	NA	NA	NA	NA	ENSVATH04848396	0.0375	0	NA	0.284	0.946	-1.975	3.93	-1.07	0.167650085	0.166534676	0.60019	0.60262	-0.541318346	-0.548402363	11	0	0	0	0	1	0	1	0	1	0	1	0	0	0	0
AT1G43700.1	318	K	Q	NA	NA	NA	NA	ENSVATH04848397	0.0125	0	NA	1	0	1.357	1.5	-10.5	0.034049261	0.091517053	2.22822	1.92885	-1.090235966	-1.453282174	1	7	0	0	0	0	0	0	0	0	0	0	0	0	0	0
AT1G43700.1	318	K	N	NA	NA	NA	NA	ENSVATH04848398	0.075	0	NA	0.168	0	0.794	1.3	-19.4	0.034049261	0.091517053	2.22822	1.92885	-1.090235966	-1.453282174	1	7	0	0	0	0	0	0	0	0	0	0	0	0	0	0
AT1G43700.1	323	M	I	NA	NA	NA	NA	ENSVATH04848400	0.0125	0	NA	0.404	0.035	-1.165	4.82	-9.21	0.11872772	0.120918008	0.957319	0.961524	-0.040152332	-0.044919147	8	0	0	0	0	0	0	0	0	1	0	0	0	0	0	0
AT1G43700.1	79	S	D	Only nuclear.	NA	PubMed:17947581	VIP1	SWISSPROT	NA	0	1	NA	0.561	-1.03	28.26	-5.62	0.149262267	0.155303492	1.36543	1.37606	-0.302013483	-0.294344081	12	0	NA	NA	0	1	0	0	1	1	0	0	0	0	0	0
AT1G44170.1	45	C	S	Decreased solubility, loss of dimerization and strongly decreased activity.	NA	PubMed:21166653	ALDH3H1	SWISSPROT	NA	1	1	0.019	0	-1.221	3.44	-10.5	0.152849077	0.160850922	2.03199	2.07827	-1.454042548	-1.410319544	11	0	1	1	0	0	0	0	0	1	0	0	0	0	0	0
AT1G44170.1	226	V	I	NA	NA	NA	NA	ENSVATH00079989	0.025	1	NA	1	0.003	-0.344	4.15	5.24	0.443999123	0.133750896	0.155671	0.156113	-4.49955631	-4.526489674	32	9	0	0	0	0	0	0	0	1	0	1	0	1	0	0
AT1G44170.1	392	A	T	NA	NA	NA	NA	ENSVATH01286104	0.0375	1	NA	0.654	0	-0.061	4.27	-5.06	0.126241608	0.113850952	2.08157	2.10398	-1.71216693	-1.685833515	9	1	0	0	0	0	0	0	0	1	0	0	0	0	0	0
AT1G44170.1	475	D	V	NA	NA	NA	NA	ENSVATH04863382	0.0125	1	NA	0.219	0.048	-2.045	8.71	-4.02	0.102356583	0.105351046	1.22289	1.24181	-0.228830113	-0.209403832	6	0	0	0	0	1	0	1	0	1	0	0	0	0	0	0
AT1G44170.1	308	D	E	NA	NA	NA	NA	ENSVATH04863394	0.0625	1	NA	0.563	0.013	-3.155	2.57	-9.59	0.390303831	0.054646275	0.137873	0.137958	-7.499608446	-7.508638305	27	13	0	0	0	0	0	1	0	0	0	0	0	1	0	0
AT1G44170.1	249	N	S	NA	NA	NA	NA	ENSVATH04863398	0.0125	1	NA	0.593	0.315	-4.103	5.01	8.83	0.958756328	0.946749292	0.0484323	0.0485483	-11.84235589	-11.88429632	41	0	0	0	0	1	0	1	0	1	1	1	1	1	1	1
AT1G44170.1	159	T	S	NA	NA	NA	NA	ENSVATH04863406	0.0125	1	NA	0.173	0	1.278	7.88	6.345	0.157275103	0.191934087	0.168191	0.135483	-5.80106813	-4.953887402	1	3	0	0	0	0	0	0	0	1	0	1	0	0	0	0
AT1G44170.1	10	A	V	NA	NA	NA	NA	ENSVATH04863497	0.0125	1	NA	0.42	0.001	-0.874	5.96	-0.611	0.109094884	0.079450576	0.713874	0.718138	-0.505418282	-0.519833462	8	2	0	0	0	0	0	0	0	1	0	1	0	0	0	0
AT1G44170.1	247	C	S	No effect on solubility, but 10% loss of activity.	NA	PubMed:21166653	ALDH3H1	SWISSPROT	NA	1	1	0.967	0.042	-6.052	4.09	7.105	0.890214454	0.850770174	0.12534	0.125623	-8.26737467	-8.301029987	39	1	0	0	0	1	1	1	0	1	0	1	0	1	0	1
AT1G44170.1	253	C	S	No effect on solubility, but loss of activity.	NA	PubMed:21166653	ALDH3H1	SWISSPROT	NA	1	1	0	0.999	-9.923	14.04	10	0.982719817	0.975639615	7.84E-19	6.50E-17	-15.67567227	-15.67567227	42	0	1	1	1	1	1	1	1	1	1	1	1	1	1	1
AT1G44446.1	274	V	E	In chl-2; reduced level of chlorophyll b.;	chl-2	NA	CAO	SWISSPROT	NA	0	1	0.001	0.998	-5.02	29.32	10	0.93479477	0.920726356	0.0302575	0.0302897	-9.592095895	-9.607155201	41	0	1	1	1	1	1	1	1	1	1	1	1	1	1	1
AT1G44446.1	392	T	S	NA	NA	NA	NA	ENSVATH01288405	0.1875	0	0	0.783	0	0.304	3.82	-0.27	0.053139777	0.043992163	0.423364	0.36949	-2.344481244	-1.903326308	6	10	0	0	0	0	0	0	0	1	0	1	0	0	0	0
AT1G44446.1	315	Q	K	NA	NA	NA	NA	ENSVATH01288423	0.1625	0	0	0.574	0.003	-1.165	2.65	2.91	0.612709515	0.295749507	0.165993	0.166207	-5.87296651	-5.888330946	34	7	0	0	0	0	0	0	0	0	0	1	0	1	0	1
AT1G44446.1	479	F	Y	NA	NA	NA	NA	ENSVATH04865702	0.0125	0	NA	0.015	0.997	-1.236	16.28	5.24	0.955821227	0.942005271	2.77E-16	2.77E-16	-12.51543112	-12.53531079	38	0	1	1	1	1	0	0	1	1	0	1	1	1	1	1
AT1G44446.1	448	S	C	NA	NA	NA	NA	ENSVATH04865705	0.0125	0	NA	0.024	0.999	-3.294	19.58	3.48	0.791902443	0.773401075	0.131564	0.131775	-5.212473642	-5.22599427	36	0	1	1	1	1	0	1	1	1	0	1	0	1	0	1
AT1G44446.1	334	S	T	NA	NA	NA	NA	ENSVATH04865720	0.0125	0	NA	0.265	0.634	-1.569	5.89	6.005	0.815299731	0.797461782	0.172002	0.172253	-5.599027071	-5.614159664	37	0	0	0	0	1	0	1	0	1	0	1	0	1	0	1
AT1G44446.1	197	T	I	NA	NA	NA	NA	ENSVATH04865741	0.025	0	NA	0.475	0.489	-1.142	2.13	-1.85	0.144293556	0.142390041	0.652825	0.654482	-0.793279339	-0.801535365	8	0	0	0	0	1	0	0	0	0	0	1	0	0	0	0
AT1G44446.1	187	A	V	NA	NA	NA	NA	ENSVATH04865742	0.025	0	NA	0.071	0.001	-0.426	3.27	5.21	0.258177943	0.226059962	0.169304	0.172153	-5.365472351	-5.446464062	3	0	0	1	0	0	0	0	0	1	0	1	0	0	0	0
AT1G44446.1	185	T	S	NA	NA	NA	NA	ENSVATH04865743	0.025	0	NA	0.863	0.001	0.102	5.46	0.755	0.147396563	0.101064115	0.32867	0.329324	-2.780976385	-2.795009587	5	2	0	0	0	0	0	0	0	1	0	1	0	0	0	0
AT1G44446.1	156	D	V	NA	NA	NA	NA	ENSVATH04865745	0.025	0	NA	0.068	0.263	-3.87	22.25	5.18	0.939011886	0.923815985	0.0277745	0.027812	-10.60653009	-10.62724997	39	0	0	1	0	1	0	1	1	1	0	1	1	1	1	1
AT1G44446.1	135	E	K	NA	NA	NA	NA	ENSVATH04865752	0.0125	0	NA	0.129	0.414	-1.576	6.15	3.3	0.676486888	0.657002524	0.234561	0.234962	-4.232364819	-4.247979225	31	0	0	1	0	1	0	1	0	1	0	1	0	1	0	1
AT1G44446.1	20	T	S	NA	NA	NA	NA	ENSVATH04865773	0.025	0	NA	0.633	0.004	0.047	NA	0.348	0.147049763	0.140299992	5.02E-17	5.02E-17	-0.596256807	-0.621932943	7	0	0	0	0	0	0	0	NA	NA	0	1	0	0	0	0
AT1G44446.1	8	P	A	NA	NA	NA	NA	ENSVATH04865775	0.05	0	NA	1	0	1.212	1.42	1.04	0.007672394	0.439533088	0.314707	0.26837	-3.487184908	-2.919312197	1	25	0	0	0	0	0	0	0	0	0	1	0	0	0	1
AT1G45145.1	39	C	S	Loss of sensitivity to victorin phytotoxin.	NA	PubMed:17322408	TRX5	SWISSPROT	NA	1	1	0.002	0.999	-9.774	14.04	10	0.983859296	0.977064892	5.61E-16	5.61E-16	-16	-16	42	0	1	1	1	1	1	1	1	1	1	1	1	1	1	1
AT1G45145.1	3	G	C	NA	NA	NA	NA	ENSVATH04875332	0.025	1	NA	0.071	0.975	-2.594	4.05	3.86	0.454657963	0.407984552	0.126466	0.126508	-7.07427908	-7.078297921	10	0	0	1	0	1	0	1	0	1	0	1	0	1	0	1
AT1G45249.1	26	S	A	Abolishes ABA-dependent phosphorylation.	NA	PubMed:16446457	ABF2	SWISSPROT	NA	0	1	0	0.924	-2.766	16.95	8.625	0.963542944	0.952070885	0.0358476	0.0358573	-12.81004672	-12.81663334	40	0	1	1	0	1	0	1	1	1	1	1	1	1	1	1
AT1G45249.1	135	T	A	Abolishes ABA-dependent phosphorylation.	NA	PubMed:16446457	ABF2	SWISSPROT	NA	0	1	0	0.98	-4.91	24.47	10	0.982603494	0.975274707	0.0122886	0.0122915	-16	-16	41	0	1	1	0	1	1	1	1	1	1	1	1	1	1	1
AT1G45249.1	324	V	M	NA	NA	NA	NA	ENSVATH01298511	0.05	0	NA	0.212	0.989	0.26	2.99	-18.3	0.131634112	0.081748834	0.57426	0.574994	-0.923596244	-0.927790555	11	3	0	0	0	1	0	0	0	1	0	0	0	0	0	0
AT1G45249.1	303	I	R	NA	NA	NA	NA	ENSVATH01298513	0.0375	0	NA	0.221	0.584	-4.445	29.08	5.3	0.414375405	0.397774575	0.340281	0.340547	-3.065697025	-3.072634771	20	0	0	0	0	1	0	1	1	1	0	1	0	1	0	1
AT1G45249.1	289	V	I	NA	NA	NA	NA	ENSVATH01298515	0.1	0	NA	0.256	0.455	-0.539	2.29	-8.08	0.445588739	0.267438286	0.21901	0.219123	-4.478068615	-4.484581875	24	4	0	0	0	1	0	0	0	0	0	0	0	1	0	0
AT1G45249.1	286	A	G	NA	NA	NA	NA	ENSVATH01298516	0.05	0	NA	0.472	0.805	1.274	2.18	-1.37	0.130497013	0.035136552	0.377439	0.377866	-1.851832475	-1.858092656	16	8	0	0	0	1	0	0	0	0	0	1	0	0	0	0
AT1G45249.1	275	F	L	NA	NA	NA	NA	ENSVATH01298517	0.0375	0	NA	0.716	0	1.2	1.53	-11.6	0.011715994	0.377166447	0.146601	0.123706	-7.397940008	-6.499704507	6	31	0	0	0	0	0	0	0	0	0	0	0	0	0	1
AT1G45249.1	273	V	M	NA	NA	NA	NA	ENSVATH01298518	0.05	0	NA	0.296	0	1	NA	-6.12	0.027377605	0.094303751	2.12138	0.562987	-0.217239375	-0.298858748	1	7	0	0	0	0	0	0	NA	NA	0	0	0	0	0	0
AT1G45249.1	251	L	I	NA	NA	NA	NA	ENSVATH01298520	0.05	0	NA	0.249	0.659	-1.243	13.97	-2.7	0.627109314	0.585434303	0.0554214	0.055452	-6.838314629	-6.846136375	20	0	0	0	0	1	0	0	1	1	0	0	0	1	0	1
AT1G45249.1	229	S	P	NA	NA	NA	NA	ENSVATH01298522	0.0375	0	NA	0.397	0	1.203	2.93	-0.895	0.044987245	0.194730264	0.339529	0.300755	-3.257116258	-2.72621192	1	10	0	0	0	0	0	0	0	1	0	1	0	0	0	0
AT1G45249.1	20	G	A	NA	NA	NA	NA	ENSVATH01298531	0.3125	0	0	0.621	0.002	-0.443	3.1	-3.55	0.096034337	0.042098258	0.575888	0.576579	-1.106752152	-1.11160594	9	5	0	0	0	0	0	0	0	1	0	0	0	0	0	0
AT1G45249.1	379	Q	H	NA	NA	NA	NA	ENSVATH04878044	0.0125	0	NA	0.057	0.993	-2.667	2.6	1.29	0.661645349	0.630062652	0.190375	0.190462	-5.951030217	-5.958694182	25	0	0	1	1	1	0	1	0	0	0	1	0	1	0	1
AT1G45249.1	257	R	I	NA	NA	NA	NA	ENSVATH04878060	0.0125	0	NA	0.099	0.988	-4.802	9.35	3.55	0.832374119	0.800251202	0.112054	0.112096	-9.198817885	-9.206792953	28	0	0	1	0	1	1	1	0	1	0	1	0	1	0	1
AT1G45249.1	232	Q	R	NA	NA	NA	NA	ENSVATH04878061	0.0125	0	NA	0.051	0.012	-2.654	6.77	3.08	0.676301924	0.643913731	0.215634	0.215738	-6.285046913	-6.292429824	25	0	0	1	0	0	0	1	0	1	0	1	0	1	0	1
AT1G45249.1	158	A	T	NA	NA	NA	NA	ENSVATH04878062	0.025	0	NA	0.626	0.991	-1.776	2.89	-5.42	0.259455608	0.22087142	0.429811	0.430332	-1.821552582	-1.828077646	16	1	0	0	0	1	0	1	0	1	0	0	0	0	0	0
AT1G45249.1	150	V	I	NA	NA	NA	NA	ENSVATH04878063	0.025	0	NA	0.011	0.805	-0.991	9.06	10	0.981372399	0.973736566	0.0135226	0.013526	-15.67567227	-15.67567227	41	0	1	1	0	1	0	0	0	1	1	1	1	1	1	1
AT1G45249.1	124	A	G	NA	NA	NA	NA	ENSVATH04878064	0.0125	0	NA	0.58	0	1.135	1.38	-19.5	0.044014237	0.007655644	2.98417	3.04522	-1.974321457	-1.950487377	12	11	0	0	0	0	0	0	0	0	0	0	0	0	0	0
AT1G45249.1	124	A	T	NA	NA	NA	NA	ENSVATH04878065	0.0125	0	NA	0.058	0	0.312	2.23	-14.9	0.098565256	0.057375098	2.98417	3.04522	-1.974321457	-1.950487377	12	4	0	1	0	0	0	0	0	0	0	0	0	0	0	0
AT1G45249.1	114	G	A	NA	NA	NA	NA	ENSVATH04878068	0.025	0	NA	0.174	0.999	-2.265	2.72	-14.3	0.056676987	0.015731463	1.42393	1.43775	-0.313618484	-0.306453312	11	8	0	0	1	1	0	1	0	0	0	0	0	0	0	0
AT1G45249.1	80	Q	L	NA	NA	NA	NA	ENSVATH04878070	0.0125	0	NA	0.536	0.234	-1.871	6.43	-12.565	0.101719597	0.105139428	1.3492	1.35612	-0.304624283	-0.298327555	6	0	0	0	0	1	0	1	0	1	0	0	0	0	0	0
AT1G45249.1	39	V	L	NA	NA	NA	NA	ENSVATH04878072	0.0125	0	NA	1	0	0.871	1.59	-19.8	0.013147441	0.116669068	1.00985	0.903767	-0.117643976	-0.010245038	2	15	0	0	0	0	0	0	0	0	0	0	0	0	0	0
AT1G45249.1	25	G	S	NA	NA	NA	NA	ENSVATH04878074	0.0125	0	NA	1	1	0.305	1.02	-19.8	0.116081098	0.027159176	0.618874	0.619551	-1.006136299	-1.010426497	19	9	0	0	1	1	0	0	0	0	0	0	0	0	0	0
AT1G45249.1	18	G	C	NA	NA	NA	NA	ENSVATH04878075	0.0125	0	NA	0.062	1	-4.125	4.49	-8.86	0.333361447	0.302320614	0.730681	0.732458	-0.332090577	-0.336251032	26	1	0	1	1	1	0	1	0	1	0	0	0	1	0	1
AT1G47710.1	351	R	A	Much less efficient in metacaspase-9 inhibition.	NA	PubMed:17028019		SWISSPROT	NA	0	1	NA	0.002	-3.38	10.49	5.34	0.899637647	0.87956988	0.0765216	0.0765662	-9.165869283	-9.178496232	36	0	NA	NA	0	0	0	1	0	1	0	1	1	1	0	1
AT1G47710.1	86	A	V	NA	NA	NA	NA	ENSVATH00084671	0.3625	0	0	0.264	0.271	-1.481	4.32	-1.31	0.168280778	0.141235268	0.495265	0.496194	-1.382075407	-1.390736506	10	1	0	0	0	1	0	1	0	1	0	1	0	0	0	0
AT1G47710.1	272	V	L	NA	NA	NA	NA	ENSVATH00084688	0.3125	0	0	0.258	0.124	-2.632	11.91	7.35	0.849969913	0.801440972	0.0780313	0.0780839	-7.60205999	-7.612542541	36	1	0	0	0	1	0	1	1	1	0	1	0	1	0	1
AT1G47710.1	330	C	S	NA	NA	NA	NA	ENSVATH00084694	0.075	0	NA	0.021	0.91	-0.861	11.56	9.47	0.712272371	0.636907024	0.0202124	0.020224	-13.08482977	-13.09731736	7	0	1	1	0	1	0	0	1	1	1	1	0	1	0	1
AT1G47710.1	143	E	G	NA	NA	NA	NA	ENSVATH01312911	0.0125	0	NA	0.119	0.174	-6.064	13.47	8.96	0.956860678	0.943341249	0.0357159	0.0357366	-12.67266968	-12.68603581	38	0	0	1	0	1	1	1	1	1	1	1	1	1	1	1
AT1G47710.1	143	E	D	NA	NA	NA	NA	ENSVATH01312912	0.0125	0	NA	0.176	0.018	-2.545	6.82	-0.128	0.951462196	0.925345775	0.0357159	0.0357366	-12.67266968	-12.68603581	38	1	0	0	0	0	0	1	0	1	0	1	1	1	1	1
AT1G47710.1	214	A	G	NA	NA	NA	NA	ENSVATH01312915	0.0125	0	NA	0.372	0	-2.729	3.02	4.12	0.348767688	0.348349034	0.559988	0.561579	-0.939000147	-0.948307358	23	0	0	0	0	0	0	1	0	1	0	1	0	1	0	1
AT1G47710.1	274	E	K	NA	NA	NA	NA	ENSVATH01312917	0.1	0	NA	0.567	0.115	-1.57	3.6	7.29	0.313299661	0.296366503	0.314323	0.314721	-3.052609906	-3.062741458	14	0	0	0	0	1	0	1	0	1	0	1	0	1	0	1
AT1G47710.1	281	K	R	NA	NA	NA	NA	ENSVATH01312918	0.3	0	0	0.038	0.99	-2.704	5.2	8.42	0.933113188	0.899826243	0.0370497	0.0370726	-11.77234978	-11.78606541	36	1	0	1	0	1	0	1	0	1	1	1	1	1	0	1
AT1G47710.1	380	V	I	NA	NA	NA	NA	ENSVATH01312921	0.1	0	NA	0.365	0.001	-0.478	4.46	3.99	0.547501388	0.262853483	0.145685	0.135531	-5.780276668	-5.304140232	32	7	0	0	0	0	0	0	0	1	0	1	0	1	0	0
AT1G47710.1	18	A	V	NA	NA	NA	NA	ENSVATH04894593	0.0125	0	NA	0.167	0.924	-2.586	4.78	9.62	0.528974007	0.502624967	0.186228	0.186355	-4.391140351	-4.395209299	22	0	0	0	0	1	0	1	0	1	1	1	0	1	0	1
AT1G47710.1	19	K	E	NA	NA	NA	NA	ENSVATH04894594	0.0125	0	NA	0.69	0.144	-3.121	6.39	7.47	0.836853574	0.804638598	0.0981437	0.0982089	-9.333544641	-9.34514116	28	0	0	0	0	1	0	1	0	1	0	1	0	1	0	1
AT1G47710.1	92	L	H	NA	NA	NA	NA	ENSVATH04894596	0.0125	0	NA	0.002	1	-6.748	16.24	3.165	0.691268424	0.661071159	0.0872902	0.0873588	-5.794227418	-5.803823815	27	0	1	1	1	1	1	1	1	1	0	1	0	1	0	1
AT1G47710.1	118	Y	F	NA	NA	NA	NA	ENSVATH04894598	0.0125	0	NA	0.286	0.01	-3.665	7.36	7.41	0.903928569	0.841639436	0.049264	0.0492933	-10.18009036	-10.18972042	37	2	0	0	0	0	0	1	0	1	0	1	1	1	0	1
AT1G47710.1	187	Q	K	NA	NA	NA	NA	ENSVATH04894621	0.0125	0	NA	1	0	3.157	0.83	4.29	0.005890219	0.667455453	0.141818	0.117908	-6.69792678	-5.785882348	2	33	0	0	0	0	0	0	0	0	0	1	0	0	0	1
AT1G47710.1	202	P	S	NA	NA	NA	NA	ENSVATH04894623	0.0125	0	NA	0.051	1	-7.481	11.17	9.5	0.961526264	0.949235245	0.0206535	0.0206651	-12.87580563	-12.88495894	39	0	0	1	1	1	1	1	0	1	1	1	1	1	1	1
AT1G47710.1	211	Y	F	NA	NA	NA	NA	ENSVATH04894624	0.0125	0	NA	0.307	0.361	-1.11	1.75	3.95	0.129500532	0.021764392	0.463132	0.46402	-1.214691524	-1.221262848	23	11	0	0	0	1	0	0	0	0	0	1	0	0	0	0
AT1G47710.1	215	Y	F	NA	NA	NA	NA	ENSVATH04894625	0.0125	0	NA	0.639	0.971	0.056	2.16	-0.854	0.091952406	0.008614863	0.350731	0.351167	-2.419754925	-2.425742958	19	14	0	0	0	1	0	0	0	0	0	1	0	0	0	0
AT1G47710.1	226	L	V	NA	NA	NA	NA	ENSVATH04894626	0.0125	0	NA	0.511	0	-0.03	6.42	3.88	0.218225261	0.200975328	0.261721	0.261913	-3.464046709	-3.470804567	6	0	0	0	0	0	0	0	0	1	0	1	0	0	0	0
AT1G47710.1	242	D	N	NA	NA	NA	NA	ENSVATH04894627	0.0375	0	NA	0.312	0.307	-3.396	3.61	6.57	0.602361799	0.534713244	0.202892	0.203086	-4.654318549	-4.665914349	27	1	0	0	0	1	0	1	0	1	0	1	0	1	0	1
AT1G47710.1	249	D	G	NA	NA	NA	NA	ENSVATH04894628	0.0125	0	NA	0.224	0.145	0.464	3.38	6.21	0.236045545	0.185775938	0.211328	0.211558	-4.463303969	-4.474802245	6	1	0	0	0	1	0	0	0	1	0	1	0	0	0	0
AT1G47710.1	259	G	A	NA	NA	NA	NA	ENSVATH04894629	0.0125	0	NA	0.567	1	-4.275	3.76	4.09	0.492763971	0.467992678	0.234973	0.235322	-4.095108717	-4.108757004	21	0	0	0	1	1	0	1	0	1	0	1	0	1	0	1
AT1G47710.1	262	D	N	NA	NA	NA	NA	ENSVATH04894631	0.05	0	NA	0.181	0.912	-2.204	5.25	4.99	0.411641765	0.34902123	0.258762	0.259055	-3.852456612	-3.863656831	19	1	0	0	0	1	0	1	0	1	0	1	0	1	0	1
AT1G47710.1	351	R	K	Slightly more efficient in metacaspase-9 inhibition.	NA	PubMed:17028019		SWISSPROT	NA	0	1	0.993	0.013	-1.457	2.34	6.78	0.875017829	0.801898222	0.0765216	0.0765662	-9.165869283	-9.178496232	36	2	0	0	0	0	0	1	0	0	0	1	0	1	0	1
AT1G48020.1	55	P	A	Inhibits dimer formation and reduces inhibitory activity.	NA	PubMed:15528298	PMEI1	SWISSPROT	NA	0	1	1	0.027	2.97	2.07	-2.65	0.056441409	0.030008751	0.166868	0.166932	-2.41365016	-2.421352769	8	12	0	0	0	0	0	0	0	0	0	0	0	0	0	0
AT1G48020.1	154	N	S	NA	NA	NA	NA	ENSVATH00086090	0.25	0	0	0.336	0.108	0.1	2.56	1.76	0.222660923	0.155231831	0.140255	0.140297	-3.241831736	-3.252318687	10	2	0	0	0	1	0	0	0	0	0	1	0	0	0	0
AT1G48020.1	109	L	I	NA	NA	NA	NA	ENSVATH00086091	0.125	0	0	0	0.937	-0.534	2.01	-20	0.571867691	0.278835491	0.0797999	0.0798122	-8.56253799	-8.569794272	22	6	1	1	0	1	0	0	0	0	0	0	0	1	0	0
AT1G48020.1	89	P	T	NA	NA	NA	NA	ENSVATH00086092	0.025	0	NA	0	0.999	-6.289	2.92	-0.0609	0.380190826	0.37043392	0.138836	0.138875	-1.51399765	-1.522378148	22	0	1	1	1	1	1	1	0	1	0	1	0	1	0	1
AT1G48020.1	86	G	V	NA	NA	NA	NA	ENSVATH00086093	0.15	0	0	0.09	0.932	-0.054	4.84	1.82	0.303273104	0.274725772	0.138082	0.138098	-4.729712555	-4.740086132	8	0	0	1	0	1	0	0	0	1	0	1	0	0	0	0
AT1G48020.1	50	T	K	NA	NA	NA	NA	ENSVATH01317432	0.3125	0	0	0.272	0	-0.659	23.05	5.13	0.19341593	0.174989234	0.133875	0.13343	-3.655165796	-3.670946031	3	0	0	0	0	0	0	0	1	1	0	1	0	0	0	0
AT1G48020.1	45	L	I	NA	NA	NA	NA	ENSVATH01317433	0.0625	0	NA	0.656	0.977	-0.111	1.27	-15.9	0.151475215	0.067725382	0.375934	0.376251	-1.618080279	-1.623585478	14	5	0	0	0	1	0	0	0	0	0	0	0	0	0	0
AT1G48020.1	172	M	I	NA	NA	NA	NA	ENSVATH04900738	0.0125	0	NA	0	0	-1.319	2.58	-11.4	0.262628458	0.186778328	0.152712	0.152772	-3.23808193	-3.249561036	13	2	1	1	0	0	0	1	0	0	0	0	0	0	0	0
AT1G48020.1	129	S	F	NA	NA	NA	NA	ENSVATH04900739	0.0125	0	NA	0	1	-5.319	4.61	-5.029	0.543434164	0.521825152	0.162316	0.162396	-3.59155142	-3.61077365	25	0	1	1	1	1	1	1	0	1	0	0	0	1	0	1
AT1G48020.1	123	G	R	NA	NA	NA	NA	ENSVATH04900740	0.0125	0	NA	0	0.999	-3.918	3.84	4.19	0.7381238	0.645830293	0.069794	0.069804	-10.53181371	-10.54067688	18	1	1	1	1	1	0	1	0	1	0	1	0	1	0	1
AT1G48020.1	13	S	F	NA	NA	NA	NA	ENSVATH04900745	0.0375	0	NA	0	0.001	-0.787	1.75	-4.945	0.155678096	0.092213648	0.218627	0.218723	-2.528365097	-2.534779296	8	3	1	1	0	0	0	0	0	0	0	0	0	0	0	0
AT1G48380.2	79	G	D	In hyp7/rhl1-2; dwarf and reduced ploidy phenotype, but DNA binding only slightly reduced.	hyp7/rhl1-2	http://www.pnas.org/content/102/51/18736	RHL1	BOTH	NA	0	1	0	1	-6.833	35.86	9.35	0.961467255	0.94818422	7.84E-19	1.53E-16	-13.53645339	-13.54651807	37	0	1	1	1	1	1	1	1	1	1	1	1	1	1	1
AT1G48380.2	323	S	G	NA	NA	NA	NA	ENSVATH00087273	0.35	0	0	0.548	0	0.457	2.44	-4.43	0.064577877	0.04015086	1.21657	1.10907	-0.130480802	-0.279216588	4	3	0	0	0	0	0	0	0	0	0	0	0	0	0	0
AT1G48380.2	245	N	K	NA	NA	NA	NA	ENSVATH00087278	0.35	0	0	0.591	0.234	0.157	5.99	-10.6	0.065384805	0.057716098	1.22635	0.925207	-0.077794762	-0.228664645	1	1	0	0	0	1	0	0	0	1	0	0	0	0	0	0
AT1G48380.2	231	I	T	NA	NA	NA	NA	ENSVATH00087279	0.35	0	0	0.353	0	2.262	1.8	2.23	0.018728148	0.157573943	0.507957	0.437449	-1.587941172	-1.208293916	2	15	0	0	0	0	0	0	0	0	0	1	0	0	0	0
AT1G48380.2	218	G	E	NA	NA	NA	NA	ENSVATH00087281	0.1	0	NA	0	0.984	-3.291	35.36	10	0.977735587	0.969243535	7.84E-19	7.84E-19	-14.81155246	-14.81155246	41	0	1	1	0	1	0	1	1	1	1	1	1	1	1	1
AT1G48380.2	351	L	P	NA	NA	NA	NA	ENSVATH01320979	0.35	0	0	0.028	0	0.727	3.56	-0.069	0.087528052	0.040455865	1.11452	0.983933	-0.015996406	-0.118730638	12	5	1	1	0	0	0	0	0	1	0	1	0	0	0	0
AT1G48380.2	348	R	K	NA	NA	NA	NA	ENSVATH01320980	0.3375	0	0	1	0	1.073	1.33	-2.27	0.010276685	0.132562391	1.07803	0.901118	-0.091828215	-0.065865296	2	17	0	0	0	0	0	0	0	0	0	0	0	0	0	0
AT1G48380.2	345	P	L	NA	NA	NA	NA	ENSVATH01320981	0.1375	0	0	0.275	0.953	-1.206	5.76	-1.295	0.11682414	0.119580851	1.01207	1.01476	-0.014558705	-0.011902782	8	0	0	0	0	1	0	0	0	1	0	1	0	0	0	0
AT1G48380.2	342	E	A	NA	NA	NA	NA	ENSVATH01320982	0.35	0	0	0.266	0.063	-0.334	NA	-1.8	0.057554693	0.06383851	1.29018	0.817941	-0.164408979	-0.232376684	1	2	0	0	0	1	0	0	NA	NA	0	1	0	0	0	0
AT1G48380.2	342	E	K	NA	NA	NA	NA	ENSVATH01320983	0.35	0	0	0.251	0.234	0.089	NA	-0.218	0.07251989	0.078308925	1.29018	0.817941	-0.164408979	-0.232376684	1	0	0	0	0	1	0	0	NA	NA	0	1	0	0	0	0
AT1G48380.2	295	S	P	NA	NA	NA	NA	ENSVATH01320984	0.3625	0	0	0.015	0	-2.943	5.2	7.045	0.510305597	0.248833335	0.0896035	0.0653668	-8.10442608	-6.963035933	25	7	1	1	0	0	0	1	0	1	0	1	0	1	0	0
AT1G48380.2	245	N	I	NA	NA	NA	NA	ENSVATH01320995	0.3625	0	0	0.135	0.133	2.02	2	-3.5	0.073353691	0.076020336	1.22635	0.925207	-0.077794762	-0.228664645	1	0	0	1	0	1	0	0	0	0	0	0	0	0	0	0
AT1G48380.2	228	S	T	NA	NA	NA	NA	ENSVATH01320996	0.3	0	0	0.55	0	0.243	2.03	-5.55	0.021643746	0.086817217	1.23905	1.11562	-0.133035453	-0.290759728	2	11	0	0	0	0	0	0	0	0	0	0	0	0	0	0
AT1G48380.2	201	I	T	NA	NA	NA	NA	ENSVATH01321000	0.3125	0	0	NA	NA	-0.267	NA	0	0.085044763	0.082442719	0.20756	0.22	0	0	1	0	NA	NA	NA	NA	0	0	NA	NA	0	1	0	0	0	0
AT1G48380.2	191	A	S	NA	NA	NA	NA	ENSVATH01321002	0.075	0	NA	NA	NA	-0.058	NA	0	0.084844523	0.082442719	0.220088	0.22	0	0	1	0	NA	NA	NA	NA	0	0	NA	NA	0	1	0	0	0	0
AT1G48380.2	188	T	S	NA	NA	NA	NA	ENSVATH01321004	0.2375	0	0	NA	NA	-0.15	NA	0	0.084722811	0.082442719	0.227716	0.22	0	0	1	0	NA	NA	NA	NA	0	0	NA	NA	0	1	0	0	0	0
AT1G48380.2	381	K	I	NA	NA	NA	NA	ENSVATH04904333	0.025	0	NA	0.015	NA	-1.303	5.51	-1.15	0.116829296	0.119523712	0.999711	1.0034	-0.003002208	-0.00025544	8	0	1	1	NA	NA	0	1	0	1	0	1	0	0	0	0
AT1G48380.2	354	K	E	NA	NA	NA	NA	ENSVATH04904334	0.0125	0	NA	0.251	0.407	-1.037	4.24	5.34	0.318561692	0.314893529	0.508395	0.50918	-1.290459538	-1.296539237	20	0	0	0	0	1	0	0	0	1	0	1	0	1	0	1
AT1G48380.2	272	V	L	NA	NA	NA	NA	ENSVATH04904340	0.0375	0	NA	0.7	0	-0.286	NA	0	0.084847365	0.082442719	0.21991	0.22	0	0	1	0	0	0	0	0	0	0	NA	NA	0	1	0	0	0	0
AT1G48380.2	226	L	M	NA	NA	NA	NA	ENSVATH04904342	0.275	0	0	0.161	0.13	0.561	2.36	0.838	0.110199692	0.093356949	0.659156	0.660039	-0.628092083	-0.631333854	6	1	0	0	0	1	0	0	0	0	0	1	0	0	0	0
AT1G48380.2	225	K	T	NA	NA	NA	NA	ENSVATH04904343	0.275	0	0	0.332	0	-2.224	4.1	3.26	0.264062099	0.119073226	0.197104	0.167202	-4.689217502	-3.915302208	18	6	0	0	0	0	0	1	0	1	0	1	0	0	0	0
AT1G48380.2	196	N	H	NA	NA	NA	NA	ENSVATH04904344	0.0125	0	NA	NA	NA	-0.453	NA	0	0.084528605	0.082442719	0.239908	0.22	0	0	1	0	NA	NA	NA	NA	0	0	NA	NA	0	1	0	0	0	0
AT1G48380.2	185	L	F	NA	NA	NA	NA	ENSVATH04904345	0.0625	0	NA	NA	NA	-0.133	NA	0	0.084523513	0.082442719	0.240228	0.22	0	0	1	0	NA	NA	NA	NA	0	0	NA	NA	0	1	0	0	0	0
AT1G48380.2	183	H	N	NA	NA	NA	NA	ENSVATH04904346	0.0125	0	NA	NA	NA	-0.333	NA	0	0.084645395	0.082442719	0.232573	0.22	0	0	1	0	NA	NA	NA	NA	0	0	NA	NA	0	1	0	0	0	0
AT1G48380.2	144	N	Y	NA	NA	NA	NA	ENSVATH04904347	0.0125	0	NA	0.038	0.998	-6.933	6.11	8.67	0.827075073	0.79109997	0.0732261	0.073278	-9.663317972	-9.682975411	26	0	0	1	1	1	1	1	0	1	1	1	0	1	0	1
AT1G48380.2	26	K	R	NA	NA	NA	NA	ENSVATH04904350	0.0125	0	NA	0.676	0.98	-2.162	1.33	0.813	0.201855121	0.0404906	0.26189	0.262164	-3.267250908	-3.275318705	22	10	0	0	0	1	0	1	0	0	0	1	0	0	0	0
AT1G48380.2	3	R	Q	NA	NA	NA	NA	ENSVATH04904351	0.0625	0	NA	0	0.663	-2.221	4.96	2.64	0.475318041	0.462935599	0.280929	0.281161	-2.443608237	-2.448600022	25	0	1	1	0	1	0	1	0	1	0	1	0	1	0	1
AT1G48380.2	2	V	E	NA	NA	NA	NA	ENSVATH04904352	0.0125	0	NA	0	0.915	-2.602	33.52	-0.326	0.495454965	0.475509938	0.236114	0.236305	-3.464367946	-3.471317214	23	0	1	1	0	1	0	1	1	1	0	1	0	1	0	1
AT1G49040.1	131	S	F	In scd1-1; temperature sensitive mutant with normal growth at the permissive temperature of 16 degrees Celsius and growth defects and sterility due to defective cytokinesis in guard cells and leaf epidermal cells at 22 degrees Celsius.	scd1-1	PubMed:12874123	SCD1	SWISSPROT	NA	0	1	0	0.999	-5.012	17.43	6.57	0.866129902	0.844051004	0.0291299	0.0291353	-7.950471874	-7.953134298	35	0	1	1	1	1	1	1	1	1	0	1	0	1	0	1
AT1G49040.1	635	S	L	NA	NA	NA	NA	ENSVATH00088875	0.025	0	NA	0.293	0.007	-0.793	2.02	-8.205	0.084246185	0.020238372	1.27093	1.27189	-0.31887278	-0.317731244	18	9	0	0	0	0	0	0	0	0	0	0	0	0	0	0
AT1G49040.1	514	N	I	NA	NA	NA	NA	ENSVATH00088881	0.175	0	0	0.142	0	-0.597	NA	-0.505	0.09482365	0.049192541	0.564674	0.565112	-0.80008583	-0.80201962	8	4	0	1	0	0	0	0	NA	NA	0	1	0	0	0	0
AT1G49040.1	396	D	H	NA	NA	NA	NA	ENSVATH00088886	0.0125	0	NA	0.151	0.974	-0.286	2.51	3.96	0.31910746	0.251876527	0.139553	0.139587	-5.661718853	-5.664574196	8	1	0	1	0	1	0	0	0	0	0	1	0	1	0	0
AT1G49040.1	638	R	Q	NA	NA	NA	NA	ENSVATH01325868	0.1125	0	0	0	0.001	-1.826	2.73	6.71	0.805136234	0.678160475	0.0669926	0.0670047	-7.279314897	-7.281588002	36	3	1	1	0	0	0	1	0	0	0	1	0	1	0	1
AT1G49040.1	507	A	P	NA	NA	NA	NA	ENSVATH01325877	0.0625	0	NA	0	0.998	-3.31	25.83	4.17	0.699785337	0.682613849	0.163441	0.163483	-3.996113138	-3.998460985	33	0	1	1	1	1	0	1	1	1	0	1	0	1	0	1
AT1G49040.1	1086	L	I	NA	NA	NA	NA	ENSVATH04911097	0.025	0	NA	0.837	0.073	0.204	4.36	1.15	0.461630152	0.158890692	0.0609932	0.0610016	-5.910978499	-5.91266588	27	8	0	0	0	1	0	0	0	1	0	1	0	1	0	0
AT1G49040.1	1019	K	I	NA	NA	NA	NA	ENSVATH04911112	0.0125	0	NA	0.387	0.218	0.831	2.8	-4.59	0.120530522	0.12251114	0.916697	0.917621	-0.084785426	-0.08589495	8	0	0	0	0	1	0	0	0	0	0	0	0	0	0	0
AT1G49040.1	919	L	Q	NA	NA	NA	NA	ENSVATH04911135	0.0125	0	NA	1	0	3.183	1.74	3.935	0.004630321	0.421862323	0.326596	0.27811	-3.086078117	-2.521794364	2	29	0	0	0	0	0	0	0	0	0	1	0	0	0	1
AT1G49040.1	888	G	S	NA	NA	NA	NA	ENSVATH04911143	0.025	0	NA	0.033	1	-3.775	1.49	3.83	0.808998533	0.789994189	0.1268	0.126827	-5.719599208	-5.722035703	36	0	1	1	1	1	0	1	0	0	0	1	0	1	0	1
AT1G49040.1	681	Y	H	NA	NA	NA	NA	ENSVATH04911225	0.0125	0	NA	0.378	0.001	-1.689	6.9	5.2	0.669827266	0.56489395	0.127545	0.12758	-4.812121275	-4.814500342	32	2	0	0	0	0	0	1	0	1	0	1	0	1	0	1
AT1G49040.1	658	Y	F	NA	NA	NA	NA	ENSVATH04911238	0.025	0	NA	0.366	0.281	-2.222	10.87	3.01	0.870304948	0.825719161	0.0361455	0.0361535	-8.016709819	-8.019286871	37	1	0	0	0	1	0	1	0	1	0	1	0	1	0	1
AT1G49040.1	638	R	W	NA	NA	NA	NA	ENSVATH04911239	0.0125	0	NA	0	0.97	-4.577	4.73	6.67	0.856854731	0.836248362	0.0669926	0.0670047	-7.279314897	-7.281588002	36	0	1	1	0	1	1	1	0	1	0	1	0	1	0	1
AT1G49040.1	565	D	N	NA	NA	NA	NA	ENSVATH04911277	0.0125	0	NA	0.101	0.032	0.446	4.13	-0.16	0.167603737	0.15603034	0.29221	0.292316	-2.660314083	-2.66181054	4	0	0	1	0	0	0	0	0	1	0	1	0	0	0	0
AT1G49040.1	516	R	K	NA	NA	NA	NA	ENSVATH04911297	0.0375	0	NA	1	0.001	0.147	NA	-3.88	0.071739231	0.003816807	0.22897	0.22905	-3.464556498	-3.467152659	17	17	0	0	0	0	0	0	NA	NA	0	0	0	0	0	0
AT1G49040.1	507	A	V	NA	NA	NA	NA	ENSVATH04911298	0.0125	0	NA	0	0.032	-1.122	9.09	2.66	0.616703205	0.470177011	0.163441	0.163483	-3.996113138	-3.998460985	33	3	1	1	0	0	0	0	0	1	0	1	0	1	0	1
AT1G49040.1	506	A	T	NA	NA	NA	NA	ENSVATH04911299	0.0125	0	NA	0.101	0.253	-1.85	7.89	-5.13	0.436151998	0.383812182	0.288421	0.288531	-2.292803819	-2.294889261	25	1	0	1	0	1	0	1	0	1	0	0	0	1	0	1
AT1G49040.1	221	K	E	NA	NA	NA	NA	ENSVATH04911360	0.025	0	NA	0.326	0.333	-1.475	7.57	1.68	0.321405318	0.319765907	0.518355	0.518699	-1.020921227	-1.022776807	21	0	0	0	0	1	0	1	0	1	0	1	0	1	0	1
AT1G49040.1	140	R	L	NA	NA	NA	NA	ENSVATH04911391	0.025	0	NA	0.023	0.921	-4.627	3.13	-1.9905	0.538386413	0.48460145	0.240148	0.240242	-2.44379402	-2.446072091	30	1	1	1	0	1	1	1	0	1	0	1	0	1	0	1
AT1G49040.1	111	I	V	NA	NA	NA	NA	ENSVATH04911394	0.0125	0	NA	0.248	0.015	-0.455	1.96	4.35	0.690814899	0.542975909	0.151374	0.151408	-5.519296157	-5.521912791	33	3	0	0	0	0	0	0	0	0	0	1	0	1	0	1
AT1G49040.1	106	R	L	NA	NA	NA	NA	ENSVATH04911395	0.025	0	NA	0.033	0	-1.11	3.77	7.61	0.391521255	0.308171744	0.0751543	0.0751627	-7.082734547	-7.084427642	8	1	1	1	0	0	0	0	0	1	0	1	0	1	0	1
AT1G49040.1	80	F	L	NA	NA	NA	NA	ENSVATH04911408	0.05	0	NA	0.116	0.529	-3.039	3.17	-0.113	0.394592003	0.339805805	0.294356	0.294458	-2.87527412	-2.877702187	21	1	0	1	0	1	0	1	0	1	0	1	0	1	0	1
AT1G49040.1	25	G	R	NA	NA	NA	NA	ENSVATH04911424	0.0125	0	NA	0	1	-5.663	36.52	3.95	0.901959299	0.881904486	3.90E-16	5.61E-16	-9.223937582	-9.22639923	36	0	1	1	1	1	1	1	1	1	0	1	1	1	0	1
AT1G50170.1	199	C	A	Impairs [4Fe-4S] cluster binding. No effect on enzymatic activity.	NA	PubMed:22414210	SIRB	SWISSPROT	NA	0	1	NA	0.393	-8.428	5.92	5.54	0.927153072	0.893093552	0.0502604	0.0503179	-11.00643152	-11.02532484	37	1	NA	NA	0	1	1	1	0	1	0	1	1	1	0	1
AT1G50170.1	210	C	A	Impairs [4Fe-4S] cluster binding. No effect on enzymatic activity.	NA	PubMed:22414210	SIRB	SWISSPROT	NA	0	1	NA	0.999	-8.351	19.92	4.49	0.865783043	0.844900813	0.0945041	0.0946455	-7.639690654	-7.657577317	36	0	NA	NA	1	1	1	1	1	1	0	1	0	1	0	1
AT1G50170.1	213	C	A	Impairs [4Fe-4S] cluster binding. No effect on enzymatic activity.	NA	PubMed:22414210	SIRB	SWISSPROT	NA	0	1	NA	1	-8.351	31.68	5.55	0.948306353	0.932858059	2.77E-16	2.77E-16	-12.08990678	-12.1084447	37	0	NA	NA	1	1	1	1	1	1	0	1	1	1	1	1
AT1G50170.1	219	C	A	Impairs [4Fe-4S] cluster binding. No effect on enzymatic activity.	NA	PubMed:22414210	SIRB	SWISSPROT	NA	0	1	NA	1	-8.343	18.74	5.61	0.934597583	0.917647156	0.0476219	0.0476749	-10.96754242	-10.98647604	37	0	NA	NA	1	1	1	1	1	1	0	1	1	1	1	1
AT1G50170.1	109	E	D	NA	NA	NA	NA	ENSVATH01333929	0.9	0	NA	0.592	0	-0.064	2.01	-19.9	0.050886586	0.012428958	0.457629	0.408704	-2.129490753	-1.733450815	11	13	0	0	0	0	0	0	0	0	0	0	0	0	0	0
AT1G50170.1	184	P	R	NA	NA	NA	NA	ENSVATH01333935	0.0125	0	NA	0.624	0.022	0.856	35.28	-1.49	0.271743272	0.288065219	0.0589373	0.028007	-7.756656809	-6.354912915	1	0	0	0	0	0	0	0	1	1	0	1	0	0	0	0
AT1G50170.1	31	S	F	NA	NA	NA	NA	ENSVATH04921399	0.025	0	NA	0	0.962	-1.193	NA	-5.83	0.106122614	0.081773567	1.69114	1.71395	-0.643224819	-0.625726522	10	2	1	1	0	1	0	0	NA	NA	0	0	0	0	0	0
AT1G50170.1	49	K	Q	NA	NA	NA	NA	ENSVATH04921400	0.0125	0	NA	0.03	0.999	-1.265	2.17	-1.2	0.268865187	0.262559853	0.462224	0.46359	-1.494124542	-1.50789364	16	0	1	1	1	1	0	0	0	0	0	1	0	0	0	0
AT1G50170.1	215	G	R	NA	NA	NA	NA	ENSVATH04921419	0.0125	0	NA	0.007	0.999	-7.357	36.52	6.72	0.949737575	0.935097879	4.36E-17	4.36E-17	-11.88573939	-11.90232283	38	0	1	1	1	1	1	1	1	1	0	1	1	1	1	1
AT1G50240.2	35	K	A	Alters binding to Kinesin-12 members.	NA	PubMed:22709276	TIO	SWISSPROT	NA	0	1	NA	1	-4.926	26.45	9.95	0.973237921	0.963487999	7.84E-19	1.12E-16	-14.27424758	-14.27424758	40	0	NA	NA	1	1	1	1	1	1	1	1	1	1	1	1
AT1G50240.2	230	E	K	NA	NA	NA	NA	ENSVATH01334515	1	0	NA	1	0	3.143	0.85	5.67	0.003102708	0.733999313	0.20119	0.166852	-5.672536847	-4.910554142	1	36	0	0	0	0	0	0	0	0	0	1	0	0	0	1
AT1G50240.2	737	L	Q	NA	NA	NA	NA	ENSVATH01334539	0.025	0	NA	0.685	0.997	-3.266	7.89	0.035	0.355719111	0.35158713	0.438204	0.438678	-1.314549381	-1.318099678	22	0	0	0	1	1	0	1	0	1	0	1	0	1	0	1
AT1G50240.2	1064	S	N	NA	NA	NA	NA	ENSVATH01334546	0.025	0	NA	0.469	0.752	-0.676	4.11	4.8	0.362063249	0.335627299	0.224752	0.22496	-4.333766651	-4.34170235	13	0	0	0	0	1	0	0	0	1	0	1	0	1	0	1
AT1G50240.2	554	A	G	NA	NA	NA	NA	ENSVATH04922074	0.05	0	NA	0.286	0.283	-1.47	3.83	1.15	0.241906685	0.22411443	0.25861	0.258818	-3.398460388	-3.404390259	8	0	0	0	0	1	0	1	0	1	0	1	0	0	0	0
AT1G50240.2	598	N	S	NA	NA	NA	NA	ENSVATH04922075	0.0625	0	NA	0.795	0.138	-0.677	3.29	5.48	0.210650923	0.198113613	0.338521	0.338856	-2.638969483	-2.6455458	8	0	0	0	0	1	0	0	0	1	0	1	0	0	0	0
AT1G50240.2	671	V	I	NA	NA	NA	NA	ENSVATH04922080	0.0125	0	NA	0.619	0.006	-0.685	2.56	3.91	0.429202055	0.335193758	0.276078	0.276312	-2.723023781	-2.728327964	25	2	0	0	0	0	0	0	0	0	0	1	0	1	0	1
AT1G50240.2	1015	D	E	NA	NA	NA	NA	ENSVATH04922083	0.0875	0	NA	1	0	-0.623	5.03	-9.14	0.110077861	0.078354129	0.523766	0.524586	-1.067791155	-1.073039484	6	2	0	0	0	0	0	0	0	1	0	0	0	0	0	0
AT1G50240.2	1300	K	T	NA	NA	NA	NA	ENSVATH04922107	0.025	0	NA	0.171	0.663	-2.457	13.43	-0.0959	0.188807328	0.182797594	0.414973	0.415558	-1.38582862	-1.39076534	10	0	0	0	0	1	0	1	1	1	0	1	0	0	0	0
AT1G50430.1	257	D	N	In DWF5-4; dwarf plant.	dwf5-4	PubMed:10758495	DWF5	SWISSPROT	NA	0	1	0.005	1	-4.936	13.88	10	0.979689611	0.971653449	0.014576	0.0145768	-15.26433005	-15.26433005	41	0	1	1	1	1	1	1	1	1	1	1	1	1	1	1
AT1G50430.1	164	S	I	NA	NA	NA	NA	ENSVATH00091335	0.0125	0	NA	0.057	0.784	-3.876	14.03	6.08	0.478231918	0.453131418	0.215673	0.215708	-4.160841978	-4.162638868	20	0	0	1	0	1	0	1	1	1	0	1	0	1	0	1
AT1G50430.1	56	I	F	NA	NA	NA	NA	ENSVATH00091338	0.0125	0	NA	0.685	0.212	-0.674	2.34	4.8	0.548778696	0.525731263	0.233368	0.233394	-4.123177341	-4.124310911	24	0	0	0	0	1	0	0	0	0	0	1	0	1	0	1
AT1G50430.1	86	G	A	NA	NA	NA	NA	ENSVATH04923416	0.025	0	NA	0	0.761	-5.356	7.62	8.9	0.954532459	0.931427808	0.0179018	0.0179028	-11.95485312	-11.95615849	41	1	1	1	0	1	1	1	0	1	1	1	1	1	1	1
AT1G50500.1	393	S	Y	In hit1-1; reduced tolerence to both heat and water stress, lethal at 37 degrees Celsius. Altered vesicle trafficking leading in changes in the plasma membrane components. Less stable plasma membrane under heat stress conditions, leading to heat intolerance; this sensitivity to heat depends more of the duration than of the intensity of the stress.	hit1-1	PubMed:16408208, PubMed:21398432, PubMed:21758000, Ref.4	VPS53	SWISSPROT	NA	1	1	0	1	-5.767	23.48	8.47	0.835941058	0.821452106	0.104411	0.104505	-5.180056829	-5.1867981	40	0	1	1	1	1	1	1	1	1	1	1	0	1	0	1
AT1G50500.1	748	G	A	NA	NA	NA	NA	ENSVATH00091434	0.1625	1	0	1	0.003	-1.254	3.4	1.5	0.116815042	0.023201261	0.562477	0.563258	-0.874317086	-0.878364661	21	10	0	0	0	0	0	0	0	1	0	1	0	0	0	0
AT1G50500.1	828	A	E	NA	NA	NA	NA	ENSVATH04923839	0.0125	1	NA	0	0.934	-1.068	34.48	7.45	0.577634409	0.566226417	0.293115	0.293409	-2.657883407	-2.663680384	30	0	1	1	0	1	0	0	1	1	0	1	0	1	0	1
AT1G50500.1	706	A	V	NA	NA	NA	NA	ENSVATH04923847	0.0125	1	NA	0.095	0.503	-1.531	4.26	5.35	0.734419875	0.681534957	0.162998	0.163131	-4.334675159	-4.341310488	36	1	0	1	0	1	0	1	0	1	0	1	0	1	0	1
AT1G50500.1	685	S	R	NA	NA	NA	NA	ENSVATH04923849	0.0125	1	NA	0.21	0.215	-2.276	3.07	5.91	0.756061087	0.699036902	0.162765	0.162899	-5.554500102	-5.563088721	34	1	0	0	0	1	0	1	0	1	0	1	0	1	0	1
AT1G50500.1	469	Q	H	NA	NA	NA	NA	ENSVATH04923872	0.0125	1	NA	0.102	0.963	-3.579	4.87	7	0.730491622	0.715072245	0.205906	0.206071	-4.049447738	-4.05560617	35	0	0	1	0	1	0	1	0	1	0	1	0	1	0	1
AT1G50500.1	415	L	V	NA	NA	NA	NA	ENSVATH04923887	0.0125	1	NA	0.206	0.341	-1.977	12.29	5.23	0.859005976	0.843456931	0.0680533	0.0681005	-5.981823966	-5.987390523	40	0	0	0	0	1	0	1	1	1	0	1	0	1	0	1
AT1G50500.1	370	Q	R	NA	NA	NA	NA	ENSVATH04923890	0.0125	1	NA	0.644	0.271	0.032	NA	0	0.096020205	0.087610668	3.39E-15	0.279981	0	-0.07990956	2	0	0	0	0	1	0	0	NA	NA	0	1	0	0	0	0
AT1G50500.1	332	D	G	NA	NA	NA	NA	ENSVATH04923893	0.025	1	NA	0.028	0.015	-2.495	3.95	-0.694	0.203933883	0.194281319	0.39993	0.400359	-2.163494228	-2.169032371	9	0	1	1	0	0	0	1	0	1	0	1	0	0	0	0
AT1G50500.1	203	C	Y	NA	NA	NA	NA	ENSVATH04923915	0.0125	1	NA	0.006	1	-10.321	21.23	9.95	0.957108221	0.944619356	7.84E-19	7.84E-19	-11.98229903	-11.99094874	40	0	1	1	1	1	1	1	1	1	1	1	1	1	1	1
AT1G50500.1	191	E	D	NA	NA	NA	NA	ENSVATH04923916	0.0125	1	NA	0.032	0.011	-1.833	6.34	-5.51	0.863915003	0.845769063	0.0845804	0.0846456	-6.876972013	-6.884456052	38	0	1	1	0	0	0	1	0	1	0	0	0	1	0	1
AT1G50500.1	62	A	S	NA	NA	NA	NA	ENSVATH04923926	0.0125	1	NA	0	1	-2.222	23.39	9.58	0.899873126	0.879614931	2.05E-16	2.05E-16	-9.109429715	-9.117139711	36	0	1	1	1	1	0	1	1	1	1	1	1	1	0	1
AT1G50500.1	47	Q	H	NA	NA	NA	NA	ENSVATH04923932	0.0125	1	NA	0.047	0.556	-2.668	3.24	-5.25	0.792214723	0.735765796	0.0738966	0.0739451	-6.438898616	-6.445956872	34	1	0	1	0	1	0	1	0	1	0	0	0	1	0	1
AT1G51170.1	165	G	S	In ucn-1; loss of activity.	ucn-1	PubMed:22927420	UNC	SWISSPROT	NA	1	1	0	1	-5.985	7.5	10	0.983859296	0.977064892	7.84E-19	7.84E-19	-16	-16	42	0	1	1	1	1	1	1	0	1	1	1	1	1	1	1
AT1G51170.1	55	K	D	Loss of activity.	NA	PubMed:22927420	UNC	SWISSPROT	NA	1	1	NA	1	-5.962	21.52	9.23	0.981344594	0.973441486	4.36E-17	2.00E-17	-16	-16	40	0	NA	NA	1	1	1	1	1	1	1	1	1	1	1	1
AT1G51170.1	395	C	W	NA	NA	NA	NA	ENSVATH00092224	0.025	1	NA	0.074	0.083	-1.742	3.29	-14.2	0.291016744	0.181727201	0.299051	0.299298	-3.933778467	-3.94242898	15	3	0	1	0	1	0	1	0	1	0	0	0	0	0	0
AT1G51170.1	297	V	M	NA	NA	NA	NA	ENSVATH00092226	1	1	NA	0.248	0.001	1.329	3.31	-0.182	0.018554421	0.113100064	0.747753	0.632643	-0.51545247	-0.239077913	2	13	0	0	0	0	0	0	0	1	0	1	0	0	0	0
AT1G51170.1	386	T	P	NA	NA	NA	NA	ENSVATH01340183	0.25	1	0	0.277	0.012	-0.904	6.5	-6.5	0.158478994	0.155849167	0.592489	0.593671	-0.909177837	-0.915634665	9	0	0	0	0	0	0	0	0	1	0	0	0	0	0	0
AT1G51170.1	221	S	L	NA	NA	NA	NA	ENSVATH01340190	0.1125	1	0	0.013	0.006	-5.314	5.84	6.15	0.750876539	0.700678026	0.247036	0.247159	-4.475201579	-4.480315045	37	1	1	1	0	0	1	1	0	1	0	1	0	1	0	1
AT1G51170.1	123	G	S	NA	NA	NA	NA	ENSVATH01340195	0.2625	1	0	0.135	0.075	-0.055	3.38	2.66	0.334082108	0.303291238	0.214341	0.214489	-5.123897679	-5.132719942	9	0	0	1	0	1	0	0	0	1	0	1	0	1	0	1
AT1G51170.1	11	L	F	NA	NA	NA	NA	ENSVATH01340198	0.375	1	0	0.314	0.915	-0.562	2.45	-14.9	0.023738503	0.040428528	10	10	-2.331839677	-2.111509925	4	0	0	0	0	1	0	0	0	0	0	0	0	0	0	0
AT1G51170.1	395	C	F	NA	NA	NA	NA	ENSVATH04930206	0.0125	1	NA	0.266	0.95	-1.628	2.03	-1.67	0.317153276	0.22977045	0.299051	0.299298	-3.933778467	-3.94242898	15	2	0	0	0	1	0	1	0	0	0	1	0	1	0	0
AT1G51170.1	300	P	S	NA	NA	NA	NA	ENSVATH04930209	0.0125	1	NA	0.079	0.998	-7.831	4.47	6.895	0.938516004	0.909394107	0.0777424	0.0777786	-11.20145984	-11.21262809	39	1	0	1	1	1	1	1	0	1	0	1	1	1	1	1
AT1G51170.1	291	T	I	NA	NA	NA	NA	ENSVATH04930210	0.0125	1	NA	0	1	-5.966	33.48	10	0.983859296	0.977064892	7.84E-19	6.50E-17	-16	-16	42	0	1	1	1	1	1	1	1	1	1	1	1	1	1	1
AT1G51170.1	268	A	D	NA	NA	NA	NA	ENSVATH04930213	0.0125	1	NA	0.011	0.999	-5.949	42.17	8.82	0.955712678	0.942594354	0.0476736	0.047694	-12.21391899	-12.22470419	39	0	1	1	1	1	1	1	1	1	1	1	1	1	1	1
AT1G51170.1	234	F	V	NA	NA	NA	NA	ENSVATH04930214	0.025	1	NA	0.69	0.931	-4.994	3.31	1.98	0.657309233	0.625996947	0.195285	0.195426	-5.863422108	-5.873144831	25	0	0	0	0	1	1	1	0	1	0	1	0	1	0	1
AT1G51170.1	139	C	Y	NA	NA	NA	NA	ENSVATH04930216	0.0125	1	NA	0.056	0.919	-9.15	5.95	6.12	0.754923661	0.720058285	0.154149	0.15425	-7.693669346	-7.703811038	26	0	0	1	0	1	1	1	0	1	0	1	0	1	0	1
AT1G51170.1	129	V	A	NA	NA	NA	NA	ENSVATH04930217	0.025	1	NA	0.861	0.068	-2.242	3.19	6.81	0.530360045	0.088010825	0.0754998	0.0755343	-9.748680379	-9.757890845	28	13	0	0	0	1	0	1	0	1	0	1	0	1	0	0
AT1G51170.1	115	V	I	NA	NA	NA	NA	ENSVATH04930219	0.025	1	NA	0.189	0.81	-0.921	1.91	7.17	0.727211134	0.697505842	0.148921	0.149006	-6.325624843	-6.334251139	28	0	0	0	0	1	0	0	0	0	0	1	0	1	0	1
AT1G51170.1	83	N	I	NA	NA	NA	NA	ENSVATH04930221	0.025	1	NA	0.035	0.028	-1.548	NA	-4.16	0.08398406	0.090344411	2.43539	2.55096	-0.732525545	-0.699837287	5	0	1	1	0	0	0	1	NA	NA	0	0	0	0	0	0
AT1G51170.1	44	S	F	NA	NA	NA	NA	ENSVATH04930223	0.0125	1	NA	0.034	0.984	-3.296	4.01	-4.58	0.21283046	0.210856524	0.580364	0.58147	-0.866633566	-0.872487027	14	0	1	1	0	1	0	1	0	1	0	0	0	0	0	0
AT1G51170.1	35	T	I	NA	NA	NA	NA	ENSVATH04930224	0.0125	1	NA	0.103	1	-5.929	5.13	7.12	0.942747209	0.927513894	0.0683516	0.0683898	-11.31491512	-11.32472221	38	0	0	1	1	1	1	1	0	1	0	1	1	1	1	1
AT1G51170.1	35	T	S	NA	NA	NA	NA	ENSVATH04930225	0.0375	1	NA	0.093	0.998	-3.897	3.01	6.735	0.935701242	0.904997724	0.0683516	0.0683898	-11.31491512	-11.32472221	38	1	0	1	1	1	0	1	0	1	0	1	1	1	1	1
AT1G51500.1	171	G	D	In cer5-1; accumulation of wax in epidermal cells cytoplasm, and reduction of cuticular wax deposition.	cer5-1	PubMed:15499022	ABCG12	SWISSPROT	NA	1	1	0	1	-6.875	35.86	9.97	0.973393969	0.963611859	2.77E-16	8.87E-17	-14.29277058	-14.30233658	40	0	1	1	1	1	1	1	1	1	1	1	1	1	1	1
AT1G51500.1	351	V	M	NA	NA	NA	NA	ENSVATH04934053	0.0125	1	NA	0.215	0.004	-0.039	3.05	-3.1	0.139506298	0.106922417	1.14495	1.14908	-0.184758396	-0.179553539	14	2	0	0	0	0	0	0	0	1	0	0	0	0	0	0
AT1G51500.1	244	S	T	NA	NA	NA	NA	ENSVATH04934059	0.0125	1	NA	0.53	0.305	-2.165	7.03	3.51	0.552785552	0.523453115	0.197294	0.197537	-4.83765668	-4.854207121	22	0	0	0	0	1	0	1	0	1	0	1	0	1	0	1
AT1G51500.1	111	I	V	NA	NA	NA	NA	ENSVATH04934060	0.0125	1	NA	1	0	0.421	1.02	-0.711	0.011549303	0.053672872	0.280869	0.28131	-2.860051684	-2.872587415	10	27	0	0	0	0	0	0	0	0	0	1	0	0	0	0
AT1G51660.1	234	T	D	Abolishes activity of MKK4 against MPK6.	NA	PubMed:23341468	MKK4	SWISSPROT	NA	1	1	NA	1	-5.46	40.59	8.825	0.982610044	0.975281269	0.0104246	0.0104261	-16	-16	41	0	NA	NA	1	1	1	1	1	1	1	1	1	1	1	1
AT1G51660.1	230	S	A	Abolishes phosphorylation by ASK7/BIN2.	NA	PubMed:11687590, PubMed:11875555, PubMed:23341468	MKK4	SWISSPROT	NA	1	1	0.112	0.997	-2.8	7.58	6.62	0.976000154	0.966573993	0.0441759	0.0441803	-15.18368445	-15.18368445	39	0	0	1	1	1	0	1	0	1	0	1	1	1	1	1
AT1G51660.1	234	T	A	Abolishes phosphorylation by ASK7/BIN2.	NA	PubMed:23341468	MKK4	SWISSPROT	NA	1	1	0	0.999	-4.427	23.52	8.77	0.982610044	0.975281269	0.0104246	0.0104261	-16	-16	41	0	1	1	1	1	0	1	1	1	1	1	1	1	1	1
AT1G51660.1	108	K	M	Loss of activity.	NA	PubMed:11687590, PubMed:11875555	MKK4	SWISSPROT	NA	1	1	0	1	-5.649	10.68	8.24	0.976787026	0.966892514	0.0107184	0.0107203	-16	-16	37	0	1	1	1	1	1	1	0	1	1	1	1	1	1	1
AT1G51660.1	108	K	R	Loss of activity.	NA	PubMed:11687590, PubMed:11875555	MKK4	SWISSPROT	NA	1	1	0	1	-2.825	4.07	8.24	0.976787026	0.966892514	0.0107184	0.0107203	-16	-16	37	0	1	1	1	1	0	1	0	1	1	1	1	1	1	1
AT1G51660.1	16	S	I	NA	NA	NA	NA	ENSVATH04935125	0.0125	1	NA	0.215	0.827	-2.652	5.71	-16.8	0.38835417	0.316271409	0.176323	0.176446	-5.383629528	-5.397279298	13	1	0	0	0	1	0	1	0	1	0	0	0	1	0	1
AT1G51660.1	182	S	N	NA	NA	NA	NA	ENSVATH04935130	0.0125	1	NA	0.602	0.005	-1.606	1.89	-19.2	0.494984152	0.23410789	0.162644	0.162729	-5.811833957	-5.824607069	26	6	0	0	0	0	0	1	0	0	0	0	0	1	0	0
AT1G51660.1	304	S	W	NA	NA	NA	NA	ENSVATH04935132	0.0125	1	NA	0	1	-6.746	14.44	4.815	0.974030363	0.964175793	0.0505001	0.0505073	-14.81155246	-14.81155246	39	0	1	1	1	1	1	1	1	1	0	1	1	1	1	1
AT1G51710.1	178	L	K	Abolishes the calmodulin-binding.	NA	PubMed:15987637	UBP6	SWISSPROT	NA	1	1	NA	1	-5.87	28.01	5.98	0.947501448	0.935107527	2.11E-16	2.30E-16	-10.30670316	-10.31007965	42	0	NA	NA	1	1	1	1	1	1	0	1	1	1	1	1
AT1G51710.1	175	W	R	Abolishes the calmodulin-binding.	NA	PubMed:15987637	UBP6	SWISSPROT	NA	1	1	0.005	0.956	-5.452	4.56	7.11	0.685743916	0.656571349	0.136084	0.136126	-5.726450126	-5.730302637	27	0	1	1	0	1	1	1	0	1	0	1	0	1	0	1
AT1G51710.1	113	C	S	Loss of activity.	NA	PubMed:15987637	UBP6	SWISSPROT	NA	1	1	0	1	-9.988	14.04	10	0.977723949	0.969515006	2.11E-16	2.11E-16	-14.46462106	-14.46462106	42	0	1	1	1	1	1	1	1	1	1	1	1	1	1	1
AT1G51710.1	387	N	S	NA	NA	NA	NA	ENSVATH00093084	0.0375	1	NA	0.711	0	-0.553	1.8	-7.12	0.124186977	0.024334899	0.464797	0.465195	-1.450799265	-1.454174761	20	10	0	0	0	0	0	0	0	0	0	0	0	0	0	0
AT1G51710.1	381	D	G	NA	NA	NA	NA	ENSVATH04935503	0.0125	1	NA	0.046	0.774	-2.511	9.48	2.5	0.483464094	0.467440004	0.241499	0.241688	-2.903423653	-2.907721593	24	0	0	1	0	1	0	1	0	1	0	1	0	1	0	1
AT1G51710.1	247	S	T	NA	NA	NA	NA	ENSVATH04935522	0.0125	1	NA	0.54	0.004	-0.178	2.8	0.005	0.261737282	0.132846843	0.636289	0.636799	-0.602181611	-0.603849492	27	5	0	0	0	0	0	0	0	0	0	1	0	0	0	0
AT1G51710.1	221	G	D	NA	NA	NA	NA	ENSVATH04935537	0.0125	1	NA	0.641	0	0.82	2.79	-20	0.029425156	0.057101628	1.16657	1.04833	-0.052495209	-0.194489627	3	9	0	0	0	0	0	0	0	0	0	0	0	0	0	0
AT1G51710.1	220	E	D	NA	NA	NA	NA	ENSVATH04935538	0.0125	1	NA	0.323	0.009	-0.843	1.72	-3.19	0.530725345	0.520042488	0.338157	0.338349	-2.503964757	-2.507532964	28	0	0	0	0	0	0	0	0	0	0	0	0	1	0	1
AT1G51760.1	206	S	L	In iar3-1; reduces activity.	iar3-1	PubMed:10072397	ILL4	SWISSPROT	NA	1	1	0.067	0.171	-5.138	13.67	7.175	0.877728589	0.857025805	0.0837832	0.0838622	-8.133810752	-8.147109688	36	0	0	1	0	1	1	1	1	1	0	1	0	1	0	1
AT1G51760.1	224	G	E	In iar3-2; abolishes activity.	iar3-2	PubMed:10072397	ILL4	SWISSPROT	NA	1	1	0.01	1	-7.836	35.36	10	0.981423163	0.973786987	2.30E-16	2.30E-16	-15.67567227	-15.67567227	41	0	1	1	1	1	1	1	1	1	1	1	1	1	1	1
AT1G51760.1	230	A	T	In iar3-3; reduces activity.	iar3-3	PubMed:10072397	ILL4	SWISSPROT	NA	1	1	0.036	0.998	-3.918	33.24	10	0.980693495	0.972879831	4.36E-17	7.84E-19	-15.49208344	-15.49208344	41	0	1	1	1	1	0	1	1	1	1	1	1	1	1	1
AT1G51760.1	226	G	E	In iar3-4; reduces activity.	iar3-4	PubMed:10072397	ILL4	SWISSPROT	NA	1	1	0.014	1	-7.836	35.36	10	0.981423163	0.973786987	4.36E-17	4.36E-17	-15.67567227	-15.67567227	41	0	1	1	1	1	1	1	1	1	1	1	1	1	1	1
AT1G51760.1	3	F	L	NA	NA	NA	NA	ENSVATH01346065	0.025	1	NA	0.875	0.003	-1.906	1.9	-2.72	0.144109964	0.081256285	1.02647	1.03334	-0.025367201	-0.020127164	18	4	0	0	0	0	0	1	0	0	0	0	0	0	0	0
AT1G51760.1	4	F	C	NA	NA	NA	NA	ENSVATH01346066	0.025	1	NA	0.155	0	-0.663	1.78	0.126	0.06152091	0.027893394	1.17421	1.20362	-0.137932457	-0.118571402	7	5	0	1	0	0	0	0	0	0	0	1	0	0	0	0
AT1G51760.1	43	D	Y	NA	NA	NA	NA	ENSVATH01346068	0.0125	1	NA	0.006	0.973	-3.464	7.04	5.26	0.250572731	0.236684266	0.292604	0.292969	-2.612136979	-2.622067534	11	0	1	1	0	1	0	1	0	1	0	1	0	0	0	0
AT1G51760.1	354	I	T	NA	NA	NA	NA	ENSVATH01346127	0.025	1	NA	0.487	0	0.271	2.36	-11.4	0.086296257	0.041702379	2.82905	2.85627	-2.406947762	-2.3832431	10	5	0	0	0	0	0	0	0	0	0	0	0	0	0	0
AT1G51760.1	6	W	R	NA	NA	NA	NA	ENSVATH04935985	0.0125	1	NA	0.15	0.002	-8.546	3.2	-0.487	0.373076787	0.218767144	0.292572	0.292854	-3.141614411	-3.150323894	24	4	0	1	0	0	1	1	0	1	0	1	0	1	0	0
AT1G51760.1	17	N	T	NA	NA	NA	NA	ENSVATH04935986	0.075	1	NA	0.589	0.023	0.774	2.15	-18	0.18093176	0.167081359	3.13334	3.16446	-3.680051165	-3.648435585	12	1	0	0	0	0	0	0	0	0	0	0	0	0	0	0
AT1G51760.1	19	T	S	NA	NA	NA	NA	ENSVATH04935987	0.0875	1	NA	0.423	0	-0.697	2.06	-2.934	0.111689688	0.085967423	1.63338	1.28924	-0.209532569	-0.494003972	11	2	0	0	0	0	0	0	0	0	0	0	0	0	0	0
AT1G51760.1	43	D	E	NA	NA	NA	NA	ENSVATH04935989	0.0125	1	NA	1	0.001	1.88	1.07	-7.68	0.027468105	0.02320174	0.292604	0.292969	-2.612136979	-2.622067534	11	20	0	0	0	0	0	0	0	0	0	0	0	0	0	0
AT1G51760.1	67	E	Q	NA	NA	NA	NA	ENSVATH04935990	0.0125	1	NA	0.226	0.425	-2.394	2.68	5.16	0.590591392	0.48756716	0.232608	0.232856	-3.655389651	-3.665789602	31	2	0	0	0	1	0	1	0	0	0	1	0	1	0	1
AT1G51760.1	223	S	R	NA	NA	NA	NA	ENSVATH04935995	0.025	1	NA	0.585	0.051	-3.353	7.56	7.96	0.927731009	0.890216792	0.0604443	0.0604732	-12.43767144	-12.45299614	33	1	0	0	0	1	0	1	0	1	1	1	1	1	0	1
AT1G51760.1	295	K	E	NA	NA	NA	NA	ENSVATH04935999	0.0125	1	NA	1	0	2.945	0.7	8.98	0.03818341	0.374576169	0.0541286	0.0541537	-10.78134898	-10.79444109	8	30	0	0	0	0	0	0	0	0	1	1	0	0	0	1
AT1G51760.1	383	V	A	NA	NA	NA	NA	ENSVATH04936004	0.0125	1	NA	0.003	0.638	-2.632	8.99	10	0.512931461	0.485585308	0.174302	0.174425	-4.418889264	-4.427628008	21	0	1	1	0	1	0	1	0	1	1	1	0	1	0	1
AT1G51950.1	37	T	K	NA	NA	NA	NA	ENSVATH01349704	0.0375	1	NA	0.917	0.81	-1.371	4.37	5.41	0.138913747	0.137849586	0.664345	0.664995	-0.603389227	-0.605676175	8	0	0	0	0	1	0	1	0	1	0	1	0	0	0	0
AT1G51950.1	58	M	I	NA	NA	NA	NA	ENSVATH01349705	0.1	1	NA	0.501	0	-0.428	1.68	-10.9	0.035893684	0.052930835	4.22113	3.58515	-3.124809047	-3.74670562	4	9	0	0	0	0	0	0	0	0	0	0	0	0	0	0
AT1G51950.1	97	V	L	NA	NA	NA	NA	ENSVATH01349711	0.0125	1	NA	0.06	0.339	-2.767	11.74	9	0.938215905	0.909742344	0.0203413	0.0203452	-10.78471678	-10.78875661	40	1	0	1	0	1	0	1	1	1	1	1	1	1	1	1
AT1G51950.1	32	N	S	NA	NA	NA	NA	ENSVATH04938551	0.025	1	NA	0.924	0.007	0.165	1.56	-16.7	0.099449997	0.076823787	2.36225	2.37142	-1.975764801	-1.965812879	7	2	0	0	0	0	0	0	0	0	0	0	0	0	0	0
AT1G51950.1	60	R	G	NA	NA	NA	NA	ENSVATH04938552	0.0125	1	NA	0.396	0.989	0.137	1.99	-4.84	0.069696463	0.032190939	1.66998	1.67377	-0.879153076	-0.874948362	8	5	0	0	0	1	0	0	0	0	0	0	0	0	0	0
AT1G51950.1	74	L	H	NA	NA	NA	NA	ENSVATH04938553	0.0125	1	NA	0.55	0.999	-1.375	12.95	2.3065	0.423025871	0.420603649	0.456416	0.456776	-1.281044325	-1.28384301	26	0	0	0	1	1	0	1	1	1	0	1	0	1	0	1
AT1G51950.1	112	S	C	NA	NA	NA	NA	ENSVATH04938564	0.0125	1	NA	0.008	0.993	-4.404	7.14	3.4115	0.601290716	0.613259837	0.201852	0.173919	-5.168105921	-4.410781164	26	0	1	1	1	1	0	1	0	1	0	1	0	1	0	1
AT1G51950.1	135	C	S	NA	NA	NA	NA	ENSVATH04938567	0.0625	1	NA	0.853	0.001	-0.26	2.41	-6.19	0.076973526	0.049539371	1.74496	1.74854	-0.985849231	-0.981549168	6	3	0	0	0	0	0	0	0	0	0	0	0	0	0	0
AT1G51950.1	145	K	N	NA	NA	NA	NA	ENSVATH04938568	0.0125	1	NA	0.455	0.025	-0.036	2.08	-3.08	0.082976162	0.062223897	1.30799	1.31034	-0.368134318	-0.365366573	6	2	0	0	0	0	0	0	0	0	0	0	0	0	0	0
AT1G51950.1	237	V	L	NA	NA	NA	NA	ENSVATH04938585	0.0125	1	NA	0.016	0.77	-2.455	6.53	6.36	0.808752846	0.753521471	0.089539	0.0895598	-6.941467692	-6.945321844	34	1	1	1	0	1	0	1	0	1	0	1	0	1	0	1
AT1G51950.1	251	I	V	NA	NA	NA	NA	ENSVATH04938587	0.0125	1	NA	0.215	0.049	-0.51	6.96	4.79	0.229463362	0.068768295	0.0692938	0.069313	-6.93855506	-6.943095148	8	7	0	0	0	1	0	0	0	1	0	1	0	0	0	0
AT1G51950.1	99	G	E	NA	crane-1	http://pcp.oxfordjournals.org/content/49/7/1025.full	IAA18	MANUAL	NA	1	1	0	1	-7.911	35.36	10	0.972682213	0.96314167	5.61E-16	5.61E-16	-13.82780587	-13.83106373	41	0	1	1	1	1	1	1	1	1	1	1	1	1	1	1
AT1G51950.1	99	G	R	NA	crane-2	http://pcp.oxfordjournals.org/content/49/7/1025.full	IAA18	MANUAL	NA	1	1	0	1	-7.911	36.52	10	0.972682213	0.96314167	5.61E-16	5.61E-16	-13.82780587	-13.83106373	41	0	1	1	1	1	1	1	1	1	1	1	1	1	1	1
AT1G52150.1	606	A	V	In cna-1; dominant negative. Loss of organogenesis and formation of ring-like corona meristems.	cna-1	PubMed:15705957	ATHB-15	SWISSPROT	NA	1	1	0.005	0.989	-3.002	12.75	4.76	0.862072998	0.843938051	0.0731728	0.0732117	-6.794838959	-6.800656281	38	0	1	1	0	1	0	1	1	1	0	1	0	1	0	1
AT1G52150.1	189	G	D	In icu4-1 and icu4-2; gain of function. Delayed in juvenile-to-adult and flowering phase change and increased number of vegetative leaves, which lack abaxial trichomes.	icu4-1	PubMed:16617092	ATHB-15	SWISSPROT	NA	1	1	0	1	-6.009	5.67	10	0.935440387	0.921535001	0.028688	0.0286997	-9.649340954	-9.655393383	41	0	1	1	1	1	1	1	0	1	1	1	1	1	1	1
AT1G52150.1	271	W	L	NA	NA	NA	NA	ENSVATH00093936	0.0125	1	NA	0.151	0.012	-11.748	33.15	10	0.9710023	0.961489358	4.36E-17	4.36E-17	-13.193489	-13.19955307	42	0	0	1	0	0	1	1	1	1	1	1	1	1	1	1
AT1G52150.1	625	N	S	NA	NA	NA	NA	ENSVATH01353431	0.1125	1	0	1	0	-0.36	2.54	-7.97	0.116878612	0.016237307	0.460005	0.460502	-1.588493091	-1.593643795	22	12	0	0	0	0	0	0	0	0	0	0	0	0	0	0
AT1G52150.1	622	Q	H	NA	NA	NA	NA	ENSVATH01353433	0.375	1	0	0.137	0	-0.102	1.95	-9.36	0.104802702	0.092043782	1.04571	1.04749	-0.053059183	-0.051047924	8	1	0	1	0	0	0	0	0	0	0	0	0	0	0	0
AT1G52150.1	622	Q	L	NA	NA	NA	NA	ENSVATH01353434	0.375	1	0	0.321	0	-0.629	4.08	-6.13	0.093763007	0.070174424	1.04571	1.04749	-0.053059183	-0.051047924	8	2	0	0	0	0	0	0	0	1	0	0	0	0	0	0
AT1G52150.1	614	A	T	NA	NA	NA	NA	ENSVATH01353435	0.0125	1	NA	0.638	0.001	-1.005	4.18	-3.88	0.238661173	0.09916761	0.459127	0.459559	-1.465289975	-1.46913208	24	6	0	0	0	0	0	0	0	1	0	0	0	0	0	0
AT1G52150.1	785	I	T	NA	NA	NA	NA	ENSVATH04941328	0.0125	1	NA	0.006	0.929	-4.096	2.91	8.07	0.7656537	0.745527795	0.154909	0.155	-5.218093905	-5.224358974	34	0	1	1	0	1	0	1	0	1	1	1	0	1	0	1
AT1G52150.1	779	C	W	NA	NA	NA	NA	ENSVATH04941329	0.0125	1	NA	0.156	0.001	-6.658	6.12	-3.35	0.660371162	0.643070066	0.27477	0.274942	-3.941293142	-3.946644926	31	0	0	1	0	0	1	1	0	1	0	0	0	1	0	1
AT1G52150.1	595	E	D	NA	NA	NA	NA	ENSVATH04941336	0.0375	1	NA	1	0.001	1.762	2.04	2.59	0.412296655	0.059351011	0.0335678	0.033591	-7.484648152	-7.491959389	28	13	0	0	0	0	0	0	0	0	0	1	0	1	0	0
AT1G52150.1	578	A	T	NA	NA	NA	NA	ENSVATH04941337	0.0125	1	NA	0.256	0.1	-3.291	33.24	9.82	0.94772315	0.93473124	2.05E-16	2.05E-16	-10.66918864	-10.6753904	41	0	0	0	0	1	0	1	1	1	1	1	1	1	1	1
AT1G52150.1	492	A	S	NA	NA	NA	NA	ENSVATH04941347	0.025	1	NA	0.359	0.104	-1.907	11.23	9.34	0.89238302	0.830166846	0.0287742	0.0287861	-8.540024306	-8.546079555	40	2	0	0	0	1	0	1	1	1	1	1	1	1	0	1
AT1G52150.1	328	I	M	NA	NA	NA	NA	ENSVATH04941358	0.0125	1	NA	0.002	0.437	-2.557	3.11	-16.2	0.882670001	0.864476931	0.0858729	0.0859199	-7.672036538	-7.679355287	38	0	1	1	0	1	0	1	0	1	0	0	0	1	0	1
AT1G52150.1	271	W	C	NA	NA	NA	NA	ENSVATH04941361	0.0125	1	NA	0.492	0.059	-11.804	29.05	10	0.9710023	0.961489358	4.36E-17	4.36E-17	-13.193489	-13.19955307	42	0	0	0	0	1	1	1	1	1	1	1	1	1	1	1
AT1G52150.1	241	N	D	NA	NA	NA	NA	ENSVATH04941363	0.0625	1	NA	0.239	0.013	-1.951	8.34	7.51	0.805498952	0.776507751	0.102046	0.102102	-7.653105471	-7.659686786	30	0	0	0	0	0	0	1	0	1	0	1	0	1	0	1
AT1G52150.1	240	M	I	NA	NA	NA	NA	ENSVATH04941364	0.0625	1	NA	0.15	0	0.201	5.97	-20	0.249210137	0.201976655	0.229626	0.229854	-3.442165697	-3.449644436	10	1	0	1	0	0	0	0	0	1	0	0	0	0	0	0
AT1G52150.1	240	M	V	NA	NA	NA	NA	ENSVATH04941365	0.0125	1	NA	0.256	0	-0.384	11.22	-8.45	0.249210137	0.201976655	0.229626	0.229854	-3.442165697	-3.449644436	10	1	0	0	0	0	0	0	1	1	0	0	0	0	0	0
AT1G52150.1	228	P	L	NA	NA	NA	NA	ENSVATH04941366	0.0125	1	NA	0.043	0.001	-7.459	6.65	8.475	0.885219266	0.821015039	0.0548568	0.0548794	-8.22612582	-8.23219132	40	2	0	1	0	0	1	1	0	1	1	1	0	1	0	1
AT1G52150.1	164	E	G	NA	NA	NA	NA	ENSVATH04941371	0.0125	1	NA	0.001	1	-5.794	28.23	10	0.971202238	0.961714433	1.61E-16	8.47E-17	-13.22550566	-13.23286121	42	0	1	1	1	1	1	1	1	1	1	1	1	1	1	1
AT1G52340.1	264	S	N	In aba2-1; reduced absicic acid synthesis.	aba2-1	http://www.plantcell.org/content/14/8/1833.full	ABA2	BOTH	NA	0	1	0.034	0.993	-2.591	11.27	8.78	0.982621216	0.975292443	0.00724402	0.00724852	-16	-16	41	0	1	1	1	1	0	1	1	1	1	1	1	1	1	1
AT1G52340.1	28	G	R	In aba2-12/sre1-2; reduced absicic acid synthesis.	aba2-12/sre1-2	http://www.plantcell.org/content/14/8/1833.full	ABA2	BOTH	NA	0	1	0.001	1	-7.56	35.99	8.92	0.978133219	0.969750736	0.0202164	0.0202234	-14.91713567	-14.91713567	41	0	1	1	1	1	1	1	1	1	1	1	1	1	1	1
AT1G52340.1	176	S	F	In aba2-13/san3-1; reduced absicic acid synthesis.	aba2-13/san3-1	http://www.plantcell.org/content/14/8/1833.full	ABA2	BOTH	NA	0	1	0	1	-5.773	11.67	7.47	0.963790238	0.951392079	0.0371627	0.0371818	-13.52338572	-13.53978193	38	0	1	1	1	1	1	1	1	1	0	1	1	1	1	1
AT1G52340.1	162	G	R	In aba2-3/sis4-1; reduced absicic acid synthesis.	aba2-3/sis4-1	PubMed:12417697	ABA2	SWISSPROT	NA	0	1	0.006	0.914	-1.504	38.17	-2.52	0.227471197	0.212828043	0.190991	0.191203	-2.60442551	-2.619125157	9	0	1	1	0	1	0	1	1	1	0	0	0	0	0	0
AT1G52340.1	45	A	V	In aba2-4/sis4-2; reduced absicic acid synthesis.	aba2-4/sis4-2	PubMed:12417697	ABA2	SWISSPROT	NA	0	1	0.001	1	-3.796	35.49	9.79	0.982646636	0.975317914	1.94E-17	4.36E-17	-16	-16	41	0	1	1	1	1	0	1	1	1	1	1	1	1	1	1
AT1G52340.1	145	R	C	In gin1-2; reduced absicic acid synthesis.	gin1-2	PubMed:12417697	ABA2	SWISSPROT	NA	0	1	0	0.999	-7.16	16.21	-2.14	0.967113926	0.955744079	0.0290763	0.029069	-13.63882766	-13.65377616	39	0	1	1	1	1	1	1	1	1	0	1	1	1	1	1
AT1G52340.1	236	A	V	In isi4; reduced absicic acid synthesis.	isi4	PubMed:11439129	ABA2	SWISSPROT	NA	0	1	0.007	1	-3.347	6.87	8.95	0.96996708	0.959121451	0.029107	0.0291189	-14.07434401	-14.09185773	39	0	1	1	1	1	0	1	0	1	1	1	1	1	1	1
AT1G52340.1	172	S	A	NA	NA	NA	NA	ENSVATH04943531	0.1125	0	0	1	0	2.044	1.39	3.575	0.006437703	0.514333025	0.12101	0.10519	-5.669894807	-4.684189135	3	31	0	0	0	0	0	0	0	0	0	1	0	0	0	1
AT1G52340.1	136	A	S	NA	NA	NA	NA	ENSVATH04943536	0.025	0	NA	0.14	0.603	-1.768	3.34	2.52	0.272736176	0.252766338	0.174904	0.175085	-3.373891729	-3.389928876	10	0	0	1	0	1	0	1	0	1	0	1	0	0	0	0
AT1G52340.1	128	T	I	NA	NA	NA	NA	ENSVATH04943538	0.025	0	NA	0.098	0	2.937	3.97	7.51	0.209993439	0.416977309	0.0861167	0.0720227	-9.962206698	-8.839117451	1	7	0	1	0	0	0	0	0	1	0	1	0	0	0	1
AT1G52340.1	120	Y	N	NA	NA	NA	NA	ENSVATH04943540	0.025	0	NA	0.309	0.002	-0.693	2.87	-16.1	0.059497981	0.022552609	2.40254	2.1506	-1.663346178	-2.055119736	6	6	0	0	0	0	0	0	0	0	0	0	0	0	0	0
AT1G52340.1	92	F	Y	NA	NA	NA	NA	ENSVATH04943545	0.125	0	0	1	0.022	-0.899	3.37	1.49	0.463057895	0.39617807	0.19727	0.197481	-4.075934295	-4.093427401	21	1	0	0	0	0	0	0	0	1	0	1	0	1	0	1
AT1G52340.1	74	F	C	NA	NA	NA	NA	ENSVATH04943548	0.125	0	0	0.183	0	2.75	1.83	-2.04	0.026383016	0.080691701	0.385492	0.339718	-2.188757544	-1.695968568	5	15	0	0	0	0	0	0	0	0	0	1	0	0	0	0
AT1G52340.1	72	T	A	NA	NA	NA	NA	ENSVATH04943549	0.125	0	0	0.564	0.01	-0.579	3.55	-7.04	0.105257421	0.073432078	0.444408	0.446649	-1.429266806	-1.451020048	4	2	0	0	0	0	0	0	0	1	0	0	0	0	0	0
AT1G52340.1	10	Y	S	NA	NA	NA	NA	ENSVATH04943564	0.175	0	0	0.399	NA	1.368	2.27	-12.95	0.0547781	0.062541931	3.01936	2.69638	-2.248770181	-2.460671682	2	4	0	0	NA	NA	0	0	0	0	0	0	0	0	0	0
AT1G52400.1	207	E	Q	Loss of activity towards ABA-GE.	NA	PubMed:16990135	BGLU18	SWISSPROT	NA	1	1	0	1	-2.811	5.43	9.05	0.982594255	0.975265459	0.0149163	0.0149198	-16	-16	41	0	1	1	1	1	0	1	0	1	1	1	1	1	1	1
AT1G52830.1	78	C	R	In shy1-1; gain of function. Affects auxin-related developmental processes. Affects photomorphogenesis.	shy1-1	NA	IAA6	SWISSPROT	NA	1	1	1	0.999	-7.993	2.72	5.36	0.673676449	0.138233946	0.0503468	0.0504177	-13.18825078	-13.24286599	26	13	0	0	1	1	1	1	0	0	0	1	0	1	0	0
AT1G52830.1	157	L	I	NA	NA	NA	NA	ENSVATH00095066	0.0125	1	NA	0.002	0.999	-1.879	15.46	8.83	0.982646636	0.975317914	4.36E-17	2.05E-17	-16	-16	41	0	1	1	1	1	0	1	1	1	1	1	1	1	1	1
AT1G52830.1	118	I	L	NA	NA	NA	NA	ENSVATH01359831	0.05	1	NA	0.317	0	-0.014	2.59	-10.6	0.065613672	0.049890257	0.878131	0.778439	-0.311461831	-0.144632298	2	2	0	0	0	0	0	0	0	0	0	0	0	0	0	0
AT1G52830.1	116	S	N	NA	NA	NA	NA	ENSVATH01359832	0.05	1	NA	0.369	0.085	-0.267	2.59	5.08	0.145991152	0.058535454	0.226198	0.200554	-4.585653491	-3.921394576	8	6	0	0	0	1	0	0	0	0	0	1	0	0	0	0
AT1G52830.1	65	P	Q	NA	NA	NA	NA	ENSVATH01359835	0.025	1	NA	0.034	1	-2.005	3	2.53	0.420213511	0.410768218	0.362085	0.365327	-1.78820957	-1.828109803	24	0	1	1	1	1	0	1	0	1	0	1	0	1	0	1
AT1G52830.1	162	P	H	NA	NA	NA	NA	ENSVATH04947697	0.0125	1	NA	0	1	-8.573	19.31	10	0.982646636	0.975317914	7.84E-19	7.84E-19	-16	-16	41	0	1	1	1	1	1	1	1	1	1	1	1	1	1	1
AT1G52830.1	43	T	S	NA	NA	NA	NA	ENSVATH04947702	0.0875	1	NA	0.78	0.006	0.212	1.74	-2.695	0.129806687	0.128625976	0.678322	0.681171	-0.591112469	-0.597363824	7	0	0	0	0	0	0	0	0	0	0	0	0	0	0	0
AT1G52830.1	20	D	N	NA	NA	NA	NA	ENSVATH04947703	0.0875	1	NA	0.491	0.989	-0.101	2.66	2.58	0.220488888	0.202823603	0.225285	0.226331	-3.102058022	-3.153144766	7	0	0	0	0	1	0	0	0	0	0	1	0	0	0	0
AT1G52830.1	9	E	Q	NA	NA	NA	NA	ENSVATH04947704	0.0125	1	NA	0.03	0.999	-2.46	9.32	7.85	0.966682219	0.952389349	0.0272595	0.0272949	-16	-16	32	0	1	1	1	1	0	1	0	1	0	1	1	1	1	1
AT1G53500.1	18	G	A	Abolishes dehydratase activity.	NA	PubMed:17190829	RHM2	SWISSPROT	NA	1	1	0	0.995	-4.55	22.05	9.27	0.976360614	0.967573814	2.30E-16	1.36E-16	-14.52482585	-14.52482585	41	0	1	1	1	1	1	1	1	1	1	1	1	1	1	1
AT1G53500.1	165	K	A	Abolishes dehydratase activity.	NA	PubMed:17190829	RHM2	SWISSPROT	NA	1	1	NA	1	-4.836	26.45	9.27	0.982646636	0.975317914	4.36E-17	4.36E-17	-16	-16	41	0	NA	NA	1	1	1	1	1	1	1	1	1	1	1	1
AT1G53500.1	96	D	N	In mum4-1; no extruded mucilage and seed coat defects. Abolishes dehydratase activity.	mum4-1	PubMed:14671019, PubMed:17190829	RHM2	SWISSPROT	NA	1	1	0.001	1	-3.821	13.97	9.27	0.982646636	0.975317914	2.05E-17	2.05E-17	-16	-16	41	0	1	1	1	1	0	1	1	1	1	1	1	1	1	1
AT1G53500.1	193	G	R	In mum4-2; no extruded mucilage and seed coat defects. Abolishes dehydratase activity.	mum4-2	PubMed:14671019, PubMed:17190829	RHM2	SWISSPROT	NA	1	1	0	1	-6.183	36.52	9.27	0.975646399	0.966400234	2.30E-16	2.30E-16	-14.72668383	-14.72668383	40	0	1	1	1	1	1	1	1	1	1	1	1	1	1	1
AT1G53500.1	359	V	A	NA	NA	NA	NA	ENSVATH01365704	0.1625	1	0	0.442	0.001	1.067	2.04	-3.38	0.018002652	0.07553999	1.26518	1.07297	-0.064992813	-0.248297588	3	13	0	0	0	0	0	0	0	0	0	0	0	0	0	0
AT1G53500.1	48	D	N	NA	NA	NA	NA	ENSVATH01365707	0.05	1	NA	1	0	2.075	1.17	6.55	0.026523564	0.170248255	0.134991	0.135033	-6.796711401	-6.801744408	8	26	0	0	0	0	0	0	0	0	0	1	0	0	0	0
AT1G53500.1	556	R	H	NA	NA	NA	NA	ENSVATH04954141	0.0125	1	NA	0.072	0.936	-2.266	13.32	5.545	0.955374834	0.942735085	0.0198939	0.0198987	-11.81132739	-11.81638571	40	0	0	1	0	1	0	1	1	1	0	1	1	1	1	1
AT1G53500.1	475	D	E	NA	NA	NA	NA	ENSVATH04954143	0.025	1	NA	0.004	0.129	-0.562	10.98	-14	0.275594446	0.248413846	0.184891	0.184963	-4.839597504	-4.844408927	6	0	1	1	0	1	0	0	0	1	0	0	0	0	0	0
AT1G53500.1	454	P	T	NA	NA	NA	NA	ENSVATH04954144	0.0875	1	NA	0.612	0	1.067	1.96	-0.652	0.061088066	0.019389433	0.255144	0.255255	-3.594826162	-3.598861494	11	15	0	0	0	0	0	0	0	0	0	1	0	0	0	0
AT1G53500.1	376	D	G	NA	NA	NA	NA	ENSVATH04954147	0.05	1	NA	0.427	0	0.016	1.87	-13.7	0.012536438	0.079355946	1.75316	1.55347	-0.683769575	-0.965913245	4	17	0	0	0	0	0	0	0	0	0	0	0	0	0	0
AT1G53500.1	36	K	A	Reduces dehydratase activity.	NA	PubMed:17190829	RHM2	SWISSPROT	NA	1	1	NA	0.153	-3.967	17.97	8.065	0.917397755	0.899301872	0.0593423	0.0593592	-9.814109246	-9.819397924	37	0	NA	NA	0	1	0	1	1	1	1	1	1	1	0	1
AT1G53670.1	132	T	S	Decreases activity 14-fold.	NA	PubMed:19457862	MSRB1	SWISSPROT	NA	0	1	0.165	0.186	-3.767	9.57	8.83	0.979890767	0.971370387	0.0138607	0.0138633	-16	-16	39	0	0	0	0	1	0	1	0	1	1	1	1	1	1	1
AT1G53670.1	116	C	S	Decreases activity 2-fold.	NA	PubMed:19457862	MSRB1	SWISSPROT	NA	0	1	0.015	0.892	-9.53	3.25	9	0.976806171	0.966911699	0.00661048	0.00661141	-16	-16	37	0	1	1	0	1	1	1	0	1	1	1	1	1	1	1
AT1G53670.1	132	T	C	Decreases activity 6-fold.	NA	PubMed:19457862	MSRB1	SWISSPROT	NA	0	1	NA	0.817	-5.867	3.8	8.83	0.974397525	0.949506783	0.0138607	0.0138633	-16	-16	39	2	NA	NA	0	1	1	1	0	1	1	1	1	1	1	1
AT1G53670.1	186	C	S	Loss of activity.	NA	PubMed:19457862, PubMed:20236937	MSRB1	SWISSPROT	NA	0	1	0	1	-10	14.04	9.96	0.982646636	0.975317914	1.71E-17	1.71E-17	-16	-16	41	0	1	1	1	1	1	1	1	1	1	1	1	1	1	1
AT1G53670.1	101	G	R	NA	NA	NA	NA	ENSVATH04955456	0.0125	0	NA	0.001	0.996	-7.93	36.52	10	0.983859296	0.977064892	2.77E-16	2.77E-16	-16	-16	42	0	1	1	1	1	1	1	1	1	1	1	1	1	1	1
AT1G53670.1	195	N	K	NA	NA	NA	NA	ENSVATH04955463	0.0375	0	NA	0.911	0	2.379	1.06	-19.4	0.016484278	0.214630942	0.1094	0.109435	-5.182865834	-5.194490307	6	26	0	0	0	0	0	0	0	0	0	0	0	0	0	0
AT1G53910.1	2	C	A	Increased lifetime of the protein and accumulation in the nucleus.	NA	PubMed:22020282, PubMed:24599061	RAP2-12	SWISSPROT	NA	1	1	NA	0.659	-8.555	24.66	8.8	0.959452266	0.946847089	0.0350841	0.0351007	-12.63218393	-12.64328021	39	0	NA	NA	0	1	1	1	1	1	1	1	1	1	1	1
AT1G53910.1	69	D	Y	NA	NA	NA	NA	ENSVATH00096814	0.0125	1	NA	0.004	0.999	-3.532	NA	0.484	0.058827725	0.067141498	5.31544	6.21851	-1.061755549	-0.988602971	7	0	1	1	1	1	0	1	NA	NA	0	1	0	0	0	0
AT1G53910.1	195	K	N	NA	NA	NA	NA	ENSVATH00096817	0.0625	1	NA	0.026	0.953	-2.939	2.69	2.07	0.603255127	0.581384672	0.217919	0.218121	-4.110679245	-4.1201326	27	0	1	1	0	1	0	1	0	0	0	1	0	1	0	1
AT1G53910.1	40	K	M	NA	NA	NA	NA	ENSVATH04957056	0.0625	1	NA	0.198	0.998	-2.118	3.78	1.27	0.228082869	0.211928972	0.19838	0.198609	-2.976838114	-2.98691829	8	0	0	0	1	1	0	1	0	1	0	1	0	0	0	0
AT1G53910.1	51	E	D	NA	NA	NA	NA	ENSVATH04957057	0.05	1	NA	1	0.002	1.41	0.98	-19	0.040387756	0.267861084	0.0698646	0.0699002	-10.1495437	-10.16057915	9	29	0	0	0	0	0	0	0	0	0	0	0	0	0	0
AT1G53910.1	102	F	I	NA	NA	NA	NA	ENSVATH04957067	0.025	1	NA	0.42	0.001	0.035	3.22	-5.91	0.123829649	0.130310318	2.05361	2.06893	-1.338098383	-1.322645851	8	0	0	0	0	0	0	0	0	1	0	0	0	0	0	0
AT1G53910.1	103	G	C	NA	NA	NA	NA	ENSVATH04957068	0.0125	1	NA	0.059	1	-1.275	2.72	-10	0.142204105	0.14050385	0.627575	0.628833	-0.692044238	-0.697669071	8	0	0	1	1	1	0	0	0	0	0	0	0	0	0	0
AT1G53910.1	106	V	I	NA	NA	NA	NA	ENSVATH04957069	0.0375	1	NA	0.222	0.125	-0.498	4.11	-10.2	0.115303394	0.100686889	0.919804	0.922371	-0.083853061	-0.08714424	9	1	0	0	0	1	0	0	0	1	0	0	0	0	0	0
AT1G53910.1	107	T	A	NA	NA	NA	NA	ENSVATH04957070	0.025	1	NA	0.83	0	0.054	3.32	5.41	0.023723783	0.191779744	0.329811	0.282436	-2.718705225	-2.166304786	2	15	0	0	0	0	0	0	0	1	0	1	0	0	0	0
AT1G53910.1	181	P	T	NA	NA	NA	NA	ENSVATH04957073	0.0125	1	NA	0	1	-7.956	17.77	10	0.979737441	0.971762441	7.84E-19	7.84E-19	-14.879015	-14.91713567	42	0	1	1	1	1	1	1	1	1	1	1	1	1	1	1
AT1G53910.1	183	E	D	NA	NA	NA	NA	ENSVATH04957075	0.0125	1	NA	0.036	0.004	-2.365	6.09	-11.2	0.859089974	0.811744043	0.0987705	0.0988291	-7.964914628	-7.975563589	36	1	1	1	0	0	0	1	0	1	0	0	0	1	0	1
AT1G53910.1	201	P	S	NA	NA	NA	NA	ENSVATH04957076	0.0125	1	NA	0.801	0.977	-2.586	2.33	-5.69	0.07741601	0.045887158	3.38692	3.4927	-1.475070588	-1.4445452	11	4	0	0	0	1	0	1	0	0	0	0	0	0	0	0
AT1G53910.1	206	N	K	NA	NA	NA	NA	ENSVATH04957077	0.0125	1	NA	0.263	0.006	-2.645	4.73	-9.49	0.184942843	0.166075095	1.0349	1.03837	-0.037889803	-0.034456832	17	1	0	0	0	0	0	1	0	1	0	0	0	0	0	0
AT1G53910.1	211	P	L	NA	NA	NA	NA	ENSVATH04957078	0.0125	1	NA	0.689	0.997	-1.148	7.06	6.645	0.780875084	0.722127249	0.107124	0.107189	-6.496731056	-6.506516854	33	1	0	0	1	1	0	0	0	1	0	1	0	1	0	1
AT1G53910.1	279	I	V	NA	NA	NA	NA	ENSVATH04957084	0.0125	1	NA	0.053	0.455	0.627	6.35	8.84	0.274562525	0.251443776	0.252145	0.252397	-4.186230258	-4.196003765	8	0	0	1	0	1	0	0	0	1	1	1	0	0	0	0
AT1G53910.1	287	V	L	NA	NA	NA	NA	ENSVATH04957086	0.0125	1	NA	1	0	1.751	0.77	-3.44	0.006327755	0.492789674	0.255428	0.213405	-3.780253102	-3.11054254	1	27	0	0	0	0	0	0	0	0	0	0	0	0	0	1
AT1G53910.1	325	D	E	NA	NA	NA	NA	ENSVATH04957089	0.0125	1	NA	0.266	0.979	-2.04	2.86	-4.96	0.495831176	0.355928538	0.281	0.281304	-3.178522501	-3.187917274	29	3	0	0	0	1	0	1	0	0	0	0	0	1	0	1
AT1G53910.1	336	D	N	NA	NA	NA	NA	ENSVATH04957091	0.0125	1	NA	0.056	0.991	-3.508	3.1	4.72	0.809892802	0.640428424	0.0985433	0.0986065	-8.365412901	-8.377089995	35	4	0	1	0	1	0	1	0	1	0	1	0	1	0	1
AT1G53910.1	336	D	V	NA	NA	NA	NA	ENSVATH04957092	0.0125	1	NA	0.002	0.997	-4.557	8.11	8.39	0.874744615	0.852902459	0.0985433	0.0986065	-8.365412901	-8.377089995	35	0	1	1	1	1	1	1	0	1	1	1	0	1	0	1
AT1G53910.1	344	L	I	NA	NA	NA	NA	ENSVATH04957094	0.0125	1	NA	0.011	0.944	-1.879	4.94	7.87	0.908671531	0.891924869	0.0645405	0.0645684	-8.613565229	-8.621358654	39	0	1	1	0	1	0	1	0	1	0	1	1	1	0	1
AT1G54030.1	80	P	L	Defects in endoplasmic reticulum (ER) protein export and organizational defects in the ER.	NA	PubMed:20626647	MVP1	SWISSPROT	NA	0	1	0	1	-7.854	13.05	8.31	0.971063155	0.95871136	0.0362743	0.0362853	-16	-16	34	0	1	1	1	1	1	1	1	1	1	1	1	1	1	1
AT1G54030.1	57	G	E	In mvp1-1; defects in endoplasmic reticulum (ER) protein export and organizational defects in the ER.	mvp1-1	PubMed:19880612	MVP1	SWISSPROT	NA	0	1	0	1	-7.661	10.85	10	0.981314521	0.973411384	0.00798228	0.00797595	-16	-16	40	0	1	1	1	1	1	1	0	1	1	1	1	1	1	1
AT1G54030.1	341	G	R	In nuc; formation of large perinuclear aggregates accumulating GLL23.	nuc	PubMed:24330158	MVP1	SWISSPROT	NA	0	1	0.035	0.96	-2.03	42.1	4.21	0.561151535	0.506058944	0.0785257	0.0785552	-8.330361461	-8.342864747	12	0	1	1	0	1	0	1	1	1	0	1	0	1	0	1
AT1G54030.1	400	E	D	NA	NA	NA	NA	ENSVATH00097029	0.0125	0	NA	0	0.799	-0.096	NA	-1.98	0.14071304	0.13981632	0.580728	0.58985	-0.237238936	-0.250804184	9	0	1	1	0	1	0	0	NA	NA	0	1	0	0	0	0
AT1G54030.1	45	H	L	NA	NA	NA	NA	ENSVATH01368708	0.3375	0	0	0.788	NA	-0.76	2.79	-19.1	0.051344476	0.061026305	3.78753	2.90043	-1.507868466	-2.068642832	1	2	0	0	NA	NA	0	0	0	0	0	0	0	0	0	0
AT1G54030.1	116	L	V	NA	NA	NA	NA	ENSVATH01368716	0.05	0	NA	0.287	0.005	0.013	9.15	-5.6	0.215951999	0.192860919	0.218403	0.218376	-4.741020492	-4.744363323	2	0	0	0	0	0	0	0	0	1	0	0	0	0	0	0
AT1G54030.1	260	L	H	NA	NA	NA	NA	ENSVATH01368746	0.0625	0	NA	0.016	1	-4.037	12.77	-4.135	0.207618438	0.213143185	0.943021	0.949737	-0.035832803	-0.041055022	17	0	1	1	1	1	0	1	1	1	0	0	0	0	0	0
AT1G54030.1	5	P	R	NA	NA	NA	NA	ENSVATH04957597	0.0125	0	NA	NA	NA	0.079	NA	0	0.084852442	0.082445235	0.219592	0.219772	0	0	1	0	NA	NA	NA	NA	0	0	NA	NA	0	1	0	0	0	0
AT1G54030.1	7	F	V	NA	NA	NA	NA	ENSVATH04957598	0.0125	0	NA	NA	NA	0.066	NA	0	0.084842655	0.082445235	0.220205	0.219772	0	0	1	0	NA	NA	NA	NA	0	0	NA	NA	0	1	0	0	0	0
AT1G54030.1	10	N	I	NA	NA	NA	NA	ENSVATH04957599	0.0625	0	NA	NA	NA	-0.048	NA	0	0.084722651	0.082445235	0.227726	0.219772	0	0	1	0	NA	NA	NA	NA	0	0	NA	NA	0	1	0	0	0	0
AT1G54030.1	14	P	R	NA	NA	NA	NA	ENSVATH04957600	0.0625	0	NA	NA	NA	0.179	NA	0	0.032468879	0.082359948	5.87784	0.227503	0	-0.688218599	1	0	NA	NA	NA	NA	0	0	NA	NA	0	1	0	0	0	0
AT1G54030.1	19	L	F	NA	NA	NA	NA	ENSVATH04957601	0.0125	0	NA	0.397	NA	0.279	NA	0	0.026497083	0.062693339	6.28484	0.22043	0	-0.678198656	1	1	0	0	NA	NA	0	0	NA	NA	0	1	0	0	0	0
AT1G54030.1	20	S	C	NA	NA	NA	NA	ENSVATH04957602	0.0125	0	NA	0.044	NA	0.252	NA	0	0.029605117	0.082360103	6.3641	0.227489	0	-0.710188161	1	0	0	1	NA	NA	0	0	NA	NA	0	1	0	0	0	0
AT1G54030.1	32	H	Y	NA	NA	NA	NA	ENSVATH04957603	0.025	0	NA	0.142	NA	0.403	2.45	-16.7	0.101684632	0.066459248	1.52115	1.53773	-0.487055585	-0.472684658	11	3	0	1	NA	NA	0	0	0	0	0	0	0	0	0	0
AT1G54030.1	33	F	V	NA	NA	NA	NA	ENSVATH04957604	0.0125	0	NA	0.139	NA	0.703	2.92	-18.7	0.08265225	0.071031872	5.42952	5.78025	-3.353505111	-3.274244317	9	2	0	1	NA	NA	0	0	0	1	0	0	0	0	0	0
AT1G54030.1	87	Q	E	NA	NA	NA	NA	ENSVATH04957609	0.025	0	NA	1	0	0.803	3.17	-20	0.05872168	0.02658743	1.26386	1.27034	-0.325120496	-0.317557069	6	5	0	0	0	0	0	0	0	1	0	0	0	0	0	0
AT1G54030.1	394	I	T	NA	NA	NA	NA	ENSVATH04957625	0.0625	0	NA	0	0.022	-0.774	NA	-2.64	0.127961923	0.127835158	0.680635	0.691481	-0.166888603	-0.178338457	8	0	1	1	0	0	0	0	NA	NA	0	0	0	0	0	0
AT1G54030.1	59	G	S	Restored lipase activity, but no effect on ER morphology.	NA	PubMed:23155454	MVP1	SWISSPROT	NA	0	1	1	0.013	2.038	0.43	7.83	0.059193604	0.566466841	0.0429412	0.0429581	-14.0801038	-14.09185773	8	32	0	0	0	0	0	0	0	0	0	1	0	0	0	1
AT1G54840.1	276	G	E	In idm2-3; DNA hypermethylation and loss of transgenes transcriptional silencing.	idm2-3	PubMed:25002145	IDM2	SWISSPROT	NA	0	1	0	1	-7.917	35.36	8.49	0.966862284	0.952569598	2.00E-17	4.36E-17	-16	-16	32	0	1	1	1	1	1	1	1	1	1	1	1	1	1	1
AT1G54840.1	246	G	D	Loss of function, but no effect on the oligomer formation.	NA	PubMed:24920332, PubMed:25002145	IDM2	SWISSPROT	NA	0	1	0.004	1	-6.717	5.9	6.58	0.887560217	0.860328321	0.0596393	0.0596541	-10.62801278	-10.63445399	30	0	1	1	1	1	1	1	0	1	0	1	0	1	0	1
AT1G54840.1	260	G	D	Loss of function.	NA	PubMed:25002145	IDM2	SWISSPROT	NA	0	1	0	1	-7	9.87	7.42	0.940128823	0.919682388	0.0145508	0.0145541	-13.45503947	-13.46196822	31	0	1	1	1	1	1	1	0	1	0	1	1	1	1	1
AT1G54840.1	49	D	E	Loss of function.	NA	PubMed:25002145	IDM2	SWISSPROT	NA	0	1	0.031	0.998	-3.552	8.51	2.97	0.715119043	0.677192504	0.0775889	0.0776148	-7.354181936	-7.362249171	24	0	1	1	1	1	0	1	0	1	0	1	0	1	0	1
AT1G54840.1	345	Q	K	NA	NA	NA	NA	ENSVATH01371265	0.0375	0	NA	0	0.022	-0.84	2.76	-15.3	0.094152276	0.074288124	2.65468	2.68918	-1.633608799	-1.619161294	8	2	1	1	0	0	0	0	0	0	0	0	0	0	0	0
AT1G54840.1	344	L	F	NA	NA	NA	NA	ENSVATH01371266	0.0375	0	NA	0.043	0.968	-1.248	3.04	-13.8	0.161881602	0.1640555	0.829597	0.830553	-0.226640016	-0.228526435	12	0	0	1	0	1	0	0	0	1	0	0	0	0	0	0
AT1G54840.1	55	H	N	NA	NA	NA	NA	ENSVATH01371268	0.0125	0	NA	0.519	0	0.055	2.47	0.404	0.130244861	0.075516279	0.236992	0.233433	-3.369538563	-3.301954289	3	3	0	0	0	0	0	0	0	0	0	1	0	0	0	0
AT1G54840.1	289	K	E	NA	NA	NA	NA	ENSVATH04963607	0.0125	0	NA	0.519	0.935	-2.403	4.69	6.41	0.559874331	0.530329339	0.20071	0.200799	-4.985042866	-4.99175763	22	0	0	0	0	1	0	1	0	1	0	1	0	1	0	1
AT1G54840.1	214	G	S	NA	NA	NA	NA	ENSVATH04963609	0.025	0	NA	0.196	0.954	0.391	0.93	2.06	0.05246377	0.040624723	0.226318	0.226445	-4.077922056	-4.083434992	9	16	0	0	0	1	0	0	0	0	0	1	0	0	0	0
AT1G54840.1	126	V	A	NA	NA	NA	NA	ENSVATH04963611	0.125	0	0	0.726	0	-0.037	3	-14.1	0.065996833	0.049152958	1.37881	1.10161	-0.081869493	-0.310651177	3	2	0	0	0	0	0	0	0	1	0	0	0	0	0	0
AT1G54840.1	83	A	S	NA	NA	NA	NA	ENSVATH04963612	0.0125	0	NA	0.607	0.49	-0.387	1.88	-3.35455	0.136250425	0.085096571	0.540119	0.540929	-0.73251147	-0.736595933	12	3	0	0	0	1	0	0	0	0	0	0	0	0	0	0
AT1G54840.1	35	L	S	NA	NA	NA	NA	ENSVATH04963613	0.0125	0	NA	0.123	0.957	-0.793	3.02	-7.3305	0.137283948	0.137774058	0.724339	0.72612	-0.251923663	-0.254903338	9	0	0	1	0	1	0	0	0	1	0	0	0	0	0	0
AT1G55325.1	407	S	N	In gct-3; uncoupled cell division, pattern formation and morphogenesis during embryogenesis.	gct-3	PubMed:20023166	MED13	SWISSPROT	NA	0	1	0	1	-2.638	10.44	6.91	0.800669977	0.743121947	0.105295	0.105351	-7.05848161	-7.064420189	33	1	1	1	1	1	0	1	0	1	0	1	0	1	0	1
AT1G55325.1	811	S	P	NA	NA	NA	NA	ENSVATH00098545	0.975	0	NA	0.323	0	3.131	2.25	3.07	0.008936976	0.142951807	0.714641	0.620501	-0.701349933	-0.445779859	3	20	0	0	0	0	0	0	0	0	0	1	0	0	0	0
AT1G55325.1	1110	T	P	NA	NA	NA	NA	ENSVATH00098549	1	0	NA	0.326	0	0.488	7.23	2.64	0.040835657	0.10971281	0.619037	0.544046	-1.087770502	-0.78897028	1	7	0	0	0	0	0	0	0	1	0	1	0	0	0	0
AT1G55325.1	1452	P	S	NA	NA	NA	NA	ENSVATH00098551	0.3875	0	0	0.056	0.068	-5.516	4.7	4.395	0.575638742	0.479445252	0.279067	0.27926	-2.730188289	-2.734001276	33	2	0	1	0	1	1	1	0	1	0	1	0	1	0	1
AT1G55325.1	1727	T	S	NA	NA	NA	NA	ENSVATH00098552	0.0375	0	NA	1	0.001	-0.074	0.87	-4.8315	0.041998073	0.008351319	1.94149	1.9512	-0.836540448	-0.830275616	10	10	0	0	0	0	0	0	0	0	0	0	0	0	0	0
AT1G55325.1	1837	H	Y	NA	NA	NA	NA	ENSVATH00098556	0.05	0	NA	0.022	0.944	-1.814	11.46	4.58	0.262352224	0.241028117	0.206699	0.206856	-3.856548001	-3.861612031	8	0	1	1	0	1	0	1	1	1	0	1	0	0	0	0
AT1G55325.1	228	E	G	NA	NA	NA	NA	ENSVATH01372968	0.45	0	0	0.39	0	-0.114	NA	0	0.032264605	0.082106219	10	0.250546	0	-4.620444314	1	0	0	0	0	0	0	0	NA	NA	0	1	0	0	0	0
AT1G55325.1	582	I	T	NA	NA	NA	NA	ENSVATH01372977	0.0375	0	NA	1	0.002	1.42	1.94	-2.57	0.137733229	0.118589825	0.720547	0.721237	-0.499940628	-0.502205391	10	1	0	0	0	0	0	0	0	0	0	0	0	0	0	0
AT1G55325.1	750	T	P	NA	NA	NA	NA	ENSVATH01372980	0.375	0	0	0.021	0.887	-3.861	7.85	0.74	0.223229981	0.226392364	0.771362	0.772362	-0.305845122	-0.308002238	17	0	1	1	0	1	0	1	0	1	0	1	0	0	0	0
AT1G55325.1	8	I	L	NA	NA	NA	NA	ENSVATH04968005	0.0125	0	NA	0.737	0.001	-1.06	3.38	1.72	0.191891269	0.129615912	1.05549	1.05935	-0.047207557	-0.044309364	21	3	0	0	0	0	0	0	0	1	0	1	0	0	0	0
AT1G55325.1	22	S	N	NA	NA	NA	NA	ENSVATH04968010	0.0125	0	NA	0.325	0.001	0.608	2.13	-2.28	0.076492315	0.041750087	1.54847	1.55309	-0.654638034	-0.64970933	8	4	0	0	0	0	0	0	0	0	0	0	0	0	0	0
AT1G55325.1	78	N	D	NA	NA	NA	NA	ENSVATH04968013	0.025	0	NA	0	1	-4.24	29.27	9.35	0.92208318	0.900707561	3.68E-17	4.36E-17	-11.43053245	-11.43689404	33	0	1	1	1	1	0	1	1	1	1	1	1	1	0	1
AT1G55325.1	165	R	M	NA	NA	NA	NA	ENSVATH04968021	0.0125	0	NA	0.004	0.998	-4.383	13.35	0.334	0.535381106	0.523758141	0.296434	0.296692	-2.550256323	-2.554869265	28	0	1	1	1	1	0	1	1	1	0	1	0	1	0	1
AT1G55325.1	219	R	C	NA	NA	NA	NA	ENSVATH04968028	0.0125	0	NA	0.139	0	0.127	NA	0	0.016056869	0.062392631	10	0.255583	0	-1.858092656	1	1	0	1	0	0	0	0	NA	NA	0	1	0	0	0	0
AT1G55325.1	220	K	I	NA	NA	NA	NA	ENSVATH04968029	0.0125	0	NA	0.128	0.001	-0.248	NA	0	0.017796434	0.082577821	10	0.207768	0	-1.769571517	1	0	0	1	0	0	0	0	NA	NA	0	1	0	0	0	0
AT1G55325.1	235	I	L	NA	NA	NA	NA	ENSVATH04968030	0.0125	0	NA	0.899	0	0.041	NA	0.208	0.020992304	0.025925374	10	10	-1.104266487	-2.556920159	1	0	0	0	0	0	0	0	NA	NA	0	1	0	0	0	0
AT1G55325.1	351	L	F	NA	NA	NA	NA	ENSVATH04968036	0.0125	0	NA	0.26	0.101	-0.054	2.75	-5.03	0.120580971	0.121010279	0.790016	0.790832	-0.308874285	-0.31077108	7	0	0	0	0	1	0	0	0	0	0	0	0	0	0	0
AT1G55325.1	431	T	M	NA	NA	NA	NA	ENSVATH04968044	0.0125	0	NA	0.026	0.967	-3.521	4.33	5.65	0.300849307	0.297227769	0.496365	0.496781	-1.238960443	-1.242003056	19	0	1	1	0	1	0	1	0	1	0	1	0	0	0	1
AT1G55325.1	583	K	I	NA	NA	NA	NA	ENSVATH04968046	0.025	0	NA	0.012	0.965	-6.708	12.98	5.62	0.869017372	0.84820066	0.0416639	0.0416874	-7.732534926	-7.738249565	36	0	1	1	0	1	1	1	1	1	0	1	0	1	0	1
AT1G55325.1	633	E	K	NA	NA	NA	NA	ENSVATH04968047	0.0375	0	NA	0.021	0.957	-3.435	10.68	6.72	0.714637512	0.694227824	0.174495	0.1746	-4.684012871	-4.688901252	32	0	1	1	0	1	0	1	0	1	0	1	0	1	0	1
AT1G55325.1	639	F	V	NA	NA	NA	NA	ENSVATH04968048	0.0125	0	NA	0	0.997	-5.648	16.48	6.72	0.877420143	0.856691098	0.0403384	0.0403606	-8.086141656	-8.091923727	36	0	1	1	1	1	1	1	1	1	0	1	0	1	0	1
AT1G55325.1	650	V	G	NA	NA	NA	NA	ENSVATH04968049	0.025	0	NA	0.062	0.646	-4.755	4.31	-0.118	0.299865018	0.298881735	0.561244	0.561761	-0.93530995	-0.938042646	20	0	0	1	0	1	1	1	0	1	0	1	0	0	0	1
AT1G55325.1	654	N	I	NA	NA	NA	NA	ENSVATH04968050	0.0125	0	NA	0.005	0.795	-7.163	7.79	3.17	0.486737173	0.470712079	0.283949	0.284164	-3.00498203	-3.009790831	24	0	1	1	0	1	1	1	0	1	0	1	0	1	0	1
AT1G55325.1	730	Q	P	NA	NA	NA	NA	ENSVATH04968051	0.0125	0	NA	0.291	0	-0.007	3.13	-2.98	0.087969295	0.048393794	1.54555	1.54846	-0.673309883	-0.670053243	10	4	0	0	0	0	0	0	0	1	0	0	0	0	0	0
AT1G55325.1	773	S	N	NA	NA	NA	NA	ENSVATH04968052	0.0125	0	NA	0.383	0	-1.9	8.67	5.76	0.343266218	0.268241241	0.0872921	0.0873437	-6.463441557	-6.46882903	7	1	0	0	0	0	0	1	0	1	0	1	0	1	0	0
AT1G55325.1	803	G	R	NA	NA	NA	NA	ENSVATH04968054	0.0125	0	NA	0.023	0.993	-4.222	9.12	3.22	0.366528246	0.355211116	0.261054	0.26132	-2.051872256	-2.055707373	20	0	1	1	1	1	0	1	0	1	0	1	0	1	0	1
AT1G55325.1	815	S	N	NA	NA	NA	NA	ENSVATH04968055	0.0125	0	NA	0	0.412	-2.185	10.45	3.48	0.658233447	0.645515652	0.270467	0.270668	-3.204130406	-3.209151393	33	0	1	1	0	1	0	1	0	1	0	1	0	1	0	1
AT1G55325.1	1020	D	Y	NA	NA	NA	NA	ENSVATH04968062	0.0125	0	NA	0.006	1	-6.604	7.86	6.72	0.55273883	0.52889769	0.212295	0.212431	-4.173837051	-4.178879021	24	0	1	1	1	1	1	1	0	1	0	1	0	1	0	1
AT1G55325.1	1029	T	I	NA	NA	NA	NA	ENSVATH04968063	0.0125	0	NA	0.145	0.059	-2.537	6.43	4.55	0.216709405	0.206379511	0.321492	0.321766	-2.105055109	-2.108889799	10	0	0	1	0	1	0	1	0	1	0	1	0	0	0	0
AT1G55325.1	1042	I	M	NA	NA	NA	NA	ENSVATH04968064	0.0125	0	NA	0.099	0.122	-0.048	7.82	-4.35	0.156816282	0.144378619	0.27893	0.279197	-2.96053829	-2.966696899	2	0	0	1	0	1	0	0	0	1	0	0	0	0	0	0
AT1G55325.1	1395	A	S	NA	NA	NA	NA	ENSVATH04968076	0.025	0	NA	0.415	0.646	-1.427	2.61	-0.475	0.133456926	0.116849725	0.883093	0.884145	-0.141812424	-0.143454772	11	1	0	0	0	1	0	1	0	0	0	1	0	0	0	0
AT1G55325.1	1500	P	L	NA	NA	NA	NA	ENSVATH04968078	0.0125	0	NA	0.103	0	-1.183	4.95	2.47	0.14574254	0.143365605	0.555882	0.556578	-0.760095184	-0.762976822	8	0	0	1	0	0	0	0	0	1	0	1	0	0	0	0
AT1G55325.1	1503	G	C	NA	NA	NA	NA	ENSVATH04968079	0.0125	0	NA	0.015	0.07	-2.492	3.2	-0.202	0.158874268	0.159689166	0.757462	0.758222	-0.397131888	-0.39920347	11	0	1	1	0	1	0	1	0	1	0	1	0	0	0	0
AT1G55325.1	1543	G	D	NA	NA	NA	NA	ENSVATH04968081	0.0125	0	NA	0	0.9	-6.17	36.44	8.79	0.897126521	0.881045197	0.0377984	0.0378157	-7.629846039	-7.634940904	40	0	1	1	0	1	1	1	1	1	1	1	1	1	0	1
AT1G55325.1	1621	R	C	NA	NA	NA	NA	ENSVATH04968086	0.025	0	NA	0.002	0.999	-7.193	17.16	4.72	0.702471282	0.689505161	0.210121	0.210265	-3.41008501	-3.414393778	35	0	1	1	1	1	1	1	1	1	0	1	0	1	0	1
AT1G55350.1	2106	R	C	In dek1-4; near absence of giant cells in sepals due to a reduced endoreduplication.	dek1-4	PubMed:23095885	DEK1	SWISSPROT	NA	0	1	0	1	-6.951	26.69	1.1	0.799834348	0.779084865	0.0564256	0.0564625	-5.721612275	-5.72646632	35	0	1	1	1	1	1	1	1	1	0	1	0	1	0	1
AT1G55350.1	1761	C	S	Loss of activity.	NA	PubMed:18952779	DEK1	SWISSPROT	NA	0	1	0.015	0.999	-9.343	5.43	8.43	0.901243776	0.884374357	0.0691267	0.0691557	-8.217731664	-8.221848742	39	0	1	1	1	1	1	1	0	1	1	1	1	1	0	1
AT1G55350.1	2077	L	M	NA	NA	NA	NA	ENSVATH00098578	0.0875	0	NA	1	0.001	1.624	0.67	2.07	0.01108781	0.754065347	0.094962	0.0627418	-9.276111809	-8.144860179	2	32	0	0	0	0	0	0	0	0	0	1	0	0	0	1
AT1G55350.1	799	E	D	NA	NA	NA	NA	ENSVATH00098591	0.05	0	NA	0.408	0.001	-0.864	3.64	-5.01	0.173365128	0.143875924	0.44668	0.447003	-1.852818528	-1.856285893	9	1	0	0	0	0	0	0	0	1	0	0	0	0	0	0
AT1G55350.1	1612	P	S	NA	NA	NA	NA	ENSVATH04968230	0.025	0	NA	0.029	0.985	-3.65	2.62	7.965	0.556380411	0.184923038	0.103581	0.103627	-7.270637553	-7.27572413	30	9	1	1	0	1	0	1	0	0	1	1	0	1	0	0
AT1G55350.1	1596	L	F	NA	NA	NA	NA	ENSVATH04968231	0.0125	0	NA	0.176	0	0.881	1.83	-5.44	0.077702944	0.017419254	0.571065	0.571397	-0.953949894	-0.95584061	13	9	0	0	0	0	0	0	0	0	0	0	0	0	0	0
AT1G55350.1	1528	P	T	NA	NA	NA	NA	ENSVATH04968232	0.0125	0	NA	0.181	0.786	-3.905	4.27	7.01	0.841172961	0.820891027	0.102067	0.102112	-6.738026184	-6.742960139	36	0	0	0	0	1	0	1	0	1	0	1	0	1	0	1
AT1G55350.1	1414	M	I	NA	NA	NA	NA	ENSVATH04968235	0.025	0	NA	1	0	0.748	1.15	-10.2	0.013186861	0.157420333	0.255788	0.25598	-3.692589546	-3.698503389	6	25	0	0	0	0	0	0	0	0	0	0	0	0	0	0
AT1G55350.1	1410	H	Q	NA	NA	NA	NA	ENSVATH04968238	0.0125	0	NA	0.366	0.005	-3.491	6.16	-3.28	0.835181255	0.813682757	0.122824	0.12288	-6.895345622	-6.900809857	35	0	0	0	0	0	0	1	0	1	0	0	0	1	0	1
AT1G55350.1	1400	L	I	NA	NA	NA	NA	ENSVATH04968239	0.0125	0	NA	0.38	0.075	-0.808	1.78	7.04	0.8515106	0.830936691	0.0758171	0.0758496	-7.084957562	-7.089466838	36	0	0	0	0	1	0	0	0	0	0	1	0	1	0	1
AT1G55350.1	1061	T	I	NA	NA	NA	NA	ENSVATH04968250	0.0125	0	NA	0.246	0.011	-3.073	3.06	-0.586	0.450483234	0.185870206	0.233242	0.233386	-3.908311944	-3.912772448	31	7	0	0	0	0	0	1	0	1	0	1	0	1	0	0
AT1G55350.1	909	L	F	NA	NA	NA	NA	ENSVATH04968253	0.0125	0	NA	0.26	0.044	-1.435	9.01	0.621	0.771164628	0.742710442	0.0478735	0.0478977	-6.638173987	-6.643974143	30	0	0	0	0	1	0	1	0	1	0	1	0	1	0	1
AT1G55350.1	742	V	A	NA	NA	NA	NA	ENSVATH04968260	0.0125	0	NA	0.455	0.003	-1.391	4.93	3.47	0.445515347	0.392045632	0.318387	0.318572	-2.497959547	-2.501282916	25	1	0	0	0	0	0	1	0	1	0	1	0	1	0	1
AT1G55350.1	729	A	V	NA	NA	NA	NA	ENSVATH04968262	0.0125	0	NA	0.008	0.789	-2.062	10.68	1.71	0.585235135	0.573192755	0.299311	0.299505	-2.811817062	-2.815646485	30	0	1	1	0	1	0	1	0	1	0	1	0	1	0	1
AT1G55350.1	512	L	F	NA	NA	NA	NA	ENSVATH04968277	0.0125	0	NA	0	0.124	-2.298	12.59	-3.64	0.867015421	0.846006946	5.61E-16	2.05E-16	-7.611627003	-7.616502394	36	0	1	1	0	1	0	1	1	1	0	0	0	1	0	1
AT1G55350.1	451	T	M	NA	NA	NA	NA	ENSVATH04968280	0.0125	0	NA	0.125	0.003	-1.213	2.73	-4.52	0.170343275	0.113595532	1.0135	1.01524	-0.014596431	-0.012930182	19	3	0	1	0	0	0	0	0	0	0	0	0	0	0	0
AT1G55350.1	188	N	S	NA	NA	NA	NA	ENSVATH04968291	0.0125	0	NA	1	0.002	-0.731	1.78	0.887	0.402216062	0.110547537	0.121797	0.12187	-6.098505716	-6.104161592	25	9	0	0	0	0	0	0	0	0	0	1	0	1	0	0
AT1G55600.1	344	E	K	In mini3-1; reduced seed size and earlier endosperm cellularization.	mini3-1	PubMed:16293693	WRKY10	SWISSPROT	NA	0	1	0	0.999	-3.781	19.98	10	0.97689572	0.968222169	6.50E-17	6.50E-17	-14.63442779	-14.63442779	41	0	1	1	1	1	0	1	1	1	1	1	1	1	1	1
AT1G55600.1	190	H	D	NA	NA	NA	NA	ENSVATH00099183	0.9875	0	NA	0.801	0	-2.408	4.84	2.22	0.106620645	0.062712039	0.392162	0.398281	-1.657824148	-1.701319366	5	3	0	0	0	0	0	1	0	1	0	1	0	0	0	0
AT1G55600.1	406	T	P	NA	NA	NA	NA	ENSVATH01374685	0.8625	0	0	0.076	0.16	-0.541	NA	0	0.084845768	0.082535618	0.22001	0.211587	0	0	1	0	0	1	0	1	0	0	NA	NA	0	1	0	0	0	0
AT1G55600.1	403	T	P	NA	NA	NA	NA	ENSVATH01374686	0.8125	0	0	0.269	NA	-1.023	NA	0	0.084845768	0.082535618	0.22001	0.211587	0	0	1	0	0	0	NA	NA	0	0	NA	NA	0	1	0	0	0	0
AT1G55600.1	401	T	P	NA	NA	NA	NA	ENSVATH01374687	0.05	0	NA	0.348	NA	0.009	NA	0	0.084845768	0.082535618	0.22001	0.211587	0	0	1	0	0	0	NA	NA	0	0	NA	NA	0	1	0	0	0	0
AT1G55600.1	272	P	S	NA	NA	NA	NA	ENSVATH01374689	0.9875	0	NA	0.255	0	1.04	3.82	7.78	0.101631148	0.152670525	0.229583	0.197944	-4.762592	-4.061241179	2	6	0	0	0	0	0	0	0	1	0	1	0	0	0	0
AT1G55600.1	241	E	Q	NA	NA	NA	NA	ENSVATH01374691	0.0625	0	NA	0.617	0.816	-0.783	2.19	3.7	0.096736434	0.034904437	0.383252	0.383697	-1.880232895	-1.886210348	8	6	0	0	0	1	0	0	0	0	0	1	0	0	0	0
AT1G55600.1	207	V	I	NA	NA	NA	NA	ENSVATH01374693	0.9875	0	NA	0.406	0.002	-0.557	6.02	7.42	0.321567144	0.286063244	0.116452	0.116512	-5.798261583	-5.806377362	6	0	0	0	0	0	0	0	0	1	0	1	0	1	0	0
AT1G55600.1	483	V	I	NA	NA	NA	NA	ENSVATH04970581	0.0125	0	NA	0.423	0.435	-0.375	2.47	4.48	0.200130425	0.183982455	0.200704	0.200955	-3.237770214	-3.244945745	5	0	0	0	0	1	0	0	0	0	0	1	0	0	0	0
AT1G55600.1	445	V	F	NA	NA	NA	NA	ENSVATH04970582	0.0375	0	NA	0.192	0.999	-3.867	3.75	-12.4	0.243789838	0.253940645	1.28735	1.2913	-0.31219022	-0.308026953	20	0	0	0	1	1	0	1	0	1	0	0	0	0	0	0
AT1G55600.1	412	Y	C	NA	NA	NA	NA	ENSVATH04970583	0.0125	0	NA	0.158	0.05	-0.467	2.27	1.44	0.073642231	0.074387116	1.5585	1.12456	-0.107214973	-0.567776541	1	0	0	0	0	1	0	0	0	0	0	1	0	0	0	0
AT1G55600.1	399	P	L	NA	NA	NA	NA	ENSVATH04970584	0.0125	0	NA	0.176	NA	-1.837	NA	0	0.020283536	0.0821144	10	0.249802	0	-2.392967681	1	0	0	0	NA	NA	0	1	NA	NA	0	1	0	0	0	0
AT1G55600.1	368	A	T	NA	NA	NA	NA	ENSVATH04970586	0.05	0	NA	0	0.333	-2.375	25.79	9.97	0.933974273	0.918501942	0.0205951	0.0206027	-10.2165531	-10.22416682	39	0	1	1	0	1	0	1	1	1	1	1	1	1	1	1
AT1G55600.1	305	N	T	NA	NA	NA	NA	ENSVATH04970593	0.0125	0	NA	0.257	0.918	-0.65	4.36	7.69	0.440316282	0.385738572	0.077744	0.0777794	-8.128565425	-8.137990926	6	0	0	0	0	1	0	0	0	1	0	1	0	1	0	1
AT1G55600.1	267	D	Y	NA	NA	NA	NA	ENSVATH04970594	0.0375	0	NA	0.009	0.988	0.2	13.55	9.73	0.669628338	0.618323879	0.061348	0.0613778	-8.748997239	-8.757809006	17	0	1	1	0	1	0	0	1	1	1	1	0	1	0	1
AT1G55600.1	244	Y	D	NA	NA	NA	NA	ENSVATH04970595	0.75	0	0	0.461	NA	-0.486	9.45	6.33	0.271340492	0.236434537	0.191231	0.196368	-4.900654357	-5.094839571	5	0	0	0	NA	NA	0	0	0	1	0	1	0	0	0	0
AT1G55600.1	243	Q	E	NA	NA	NA	NA	ENSVATH04970596	0.0375	0	NA	1	0.135	0.827	7.56	2.94	0.116604429	0.080784692	0.326182	0.314903	-2.266334175	-2.220084758	3	2	0	0	0	1	0	0	0	1	0	1	0	0	0	0
AT1G55600.1	242	D	N	NA	NA	NA	NA	ENSVATH04970597	0.0125	0	NA	0.027	0.904	-1.244	13.61	9.57	0.731539383	0.704279416	0.117288	0.116941	-6.075794654	-6.0619228	29	0	1	1	0	1	0	0	1	1	1	1	0	1	0	1
AT1G55600.1	221	E	V	NA	NA	NA	NA	ENSVATH04970598	0.0125	0	NA	0.265	0.915	-1.832	18.14	6.51	0.274738783	0.25497049	0.202654	0.202808	-3.456254694	-3.463697917	10	0	0	0	0	1	0	1	1	1	0	1	0	0	0	0
AT1G55600.1	98	N	Y	NA	NA	NA	NA	ENSVATH04970611	0.0125	0	NA	0.078	0.974	-0.893	3.07	3.1	0.095624485	0.093763733	0.597116	0.59658	-0.634659925	-0.632576983	2	0	0	1	0	1	0	0	0	1	0	1	0	0	0	0
AT1G55600.1	65	E	K	NA	NA	NA	NA	ENSVATH04970612	0.0125	0	NA	0.02	0.659	-3.067	10.87	8.43	0.868363615	0.843787521	0.0584061	0.0584309	-8.752350711	-8.760848206	33	0	1	1	0	1	0	1	0	1	1	1	0	1	0	1
AT1G55600.1	51	R	K	NA	NA	NA	NA	ENSVATH04970615	0.0875	0	NA	0.96	0.271	-0.178	2.16	-4.72	0.087999218	0.076209733	0.933834	0.935972	-0.070186301	-0.072894093	5	1	0	0	0	1	0	0	0	0	0	0	0	0	0	0
AT1G55600.1	50	P	A	NA	NA	NA	NA	ENSVATH04970616	0.0125	0	NA	0.331	0.904	-0.71	3.95	1.49	0.139350787	0.1045996	0.810781	0.81307	-0.193232769	-0.196683575	13	2	0	0	0	1	0	0	0	1	0	1	0	0	0	0
AT1G55600.1	45	P	R	NA	NA	NA	NA	ENSVATH04970617	0.05	0	NA	0.304	0.988	-2.755	NA	0.55	0.114137374	0.117746413	1.21488	1.23473	-0.09099414	-0.08389468	8	0	0	0	0	1	0	1	NA	NA	0	1	0	0	0	0
AT1G55600.1	41	S	T	NA	NA	NA	NA	ENSVATH04970618	0.0125	0	NA	0.604	0.271	-1.615	2.28	-4.46	0.187744013	0.147796291	1.33834	1.3686	-0.324548877	-0.301336716	19	2	0	0	0	1	0	1	0	0	0	0	0	0	0	0
AT1G55600.1	5	D	N	NA	NA	NA	NA	ENSVATH04970620	0.0125	0	NA	0	0.904	-3.047	2.43	6.1	0.632549807	0.607766738	0.182316	0.18245	-4.658339978	-4.666188112	27	0	1	1	0	1	0	1	0	0	0	1	0	1	0	1
AT1G55860.2	3648	C	S	Abolishes ability to conjugate ubiquitin in vitro.	NA	PubMed:10571878	UPL1	SWISSPROT	NA	1	1	0	1	-9.427	10.58	9.115	0.977314595	0.961928059	0.0119609	0.0119636	-16	-16	39	1	1	1	1	1	1	1	0	1	1	1	1	1	1	1
AT1G55860.2	3045	G	R	NA	NA	NA	NA	ENSVATH00099718	0.025	1	NA	0	1	-7.862	6.45	8.55	0.939276276	0.923656722	0.0468584	0.0468725	-11.00423015	-11.01165512	38	0	1	1	1	1	1	1	0	1	1	1	1	1	1	1
AT1G55860.2	2452	M	V	NA	NA	NA	NA	ENSVATH00099723	0.4	1	0	0.798	0	0.23	3.48	-0.614	0.052157484	0.068996846	0.97528	0.811441	-0.201609733	-0.020292777	1	3	0	0	0	0	0	0	0	1	0	1	0	0	0	0
AT1G55860.2	3132	G	E	NA	NA	NA	NA	ENSVATH01375740	0.275	1	0	0.184	0.603	-1.564	3.93	-10.5	0.197244926	0.168834662	0.468778	0.469631	-0.890927919	-0.895697298	14	1	0	0	0	1	0	1	0	1	0	0	0	0	0	0
AT1G55860.2	3132	G	R	NA	NA	NA	NA	ENSVATH01375741	0.275	1	0	0.089	0.914	-3.042	4.29	3.88	0.217543832	0.214362406	0.468778	0.469631	-0.890927919	-0.895697298	14	0	0	1	0	1	0	1	0	1	0	1	0	0	0	0
AT1G55860.2	3128	E	D	NA	NA	NA	NA	ENSVATH01375742	1	1	NA	0.576	0	2.097	1.28	-14.8	0.010160161	0.06807382	2.07174	1.76564	-0.736865968	-1.089320111	5	19	0	0	0	0	0	0	0	0	0	0	0	0	0	0
AT1G55860.2	2380	E	D	NA	NA	NA	NA	ENSVATH01375750	0.4	1	0	0.159	0.184	-2.455	2.32	-6.97	0.679055439	0.433176181	0.0878506	0.0878866	-7.042784089	-7.050276836	31	5	0	0	0	1	0	1	0	0	0	0	0	1	0	1
AT1G55860.2	1939	A	T	NA	NA	NA	NA	ENSVATH01375752	0.1875	1	0	0.163	0.039	-0.778	3.35	-0.584	0.235772255	0.228140751	0.388108	0.388544	-1.643882319	-1.648957794	13	0	0	0	0	1	0	0	0	1	0	1	0	0	0	0
AT1G55860.2	1717	E	D	NA	NA	NA	NA	ENSVATH01375756	0.5	1	0	0.629	0.391	-2.343	2.79	-8.76	0.494531498	0.309132309	0.208955	0.209111	-4.354237896	-4.360888202	27	4	0	0	0	1	0	1	0	0	0	0	0	1	0	1
AT1G55860.2	1528	G	R	NA	NA	NA	NA	ENSVATH01375757	0.0125	1	NA	0.516	0	1.906	2.29	-4.78	0.107957259	0.077096622	0.568464	0.569186	-1.00982859	-1.013941183	6	2	0	0	0	0	0	0	0	0	0	0	0	0	0	0
AT1G55860.2	3543	R	C	NA	NA	NA	NA	ENSVATH04972533	0.0125	1	NA	0	1	-7.55	7.82	-2.74	0.90030265	0.882263207	0.0466119	0.0466262	-8.487846779	-8.49541224	38	0	1	1	1	1	1	1	0	1	0	0	1	1	0	1
AT1G55860.2	3508	E	D	NA	NA	NA	NA	ENSVATH04972534	0.0125	1	NA	0.167	0.09	-2.877	13.31	4.6	0.981344594	0.973441486	7.84E-19	6.50E-17	-16	-16	40	0	0	0	0	1	0	1	1	1	0	1	1	1	1	1
AT1G55860.2	3291	P	A	NA	NA	NA	NA	ENSVATH04972542	0.025	1	NA	0.011	1	-7.895	5.56	8.69	0.961825604	0.940492027	0.0140683	0.0140717	-13.14241122	-13.14983672	40	1	1	1	1	1	1	1	0	1	1	1	1	1	1	1
AT1G55860.2	3178	N	K	NA	NA	NA	NA	ENSVATH04972543	0.0125	1	NA	0.062	0.159	-4.389	4.91	-16.3	0.239254163	0.215895555	0.92616	0.928535	-0.075376517	-0.07829168	21	1	0	1	0	1	0	1	0	1	0	0	0	0	0	0
AT1G55860.2	3129	S	N	NA	NA	NA	NA	ENSVATH04972544	0.0125	1	NA	0.106	0.001	-0.796	1.91	-8.97	0.0974712	0.061152858	0.808489	0.810478	-0.252857865	-0.256735673	9	3	0	1	0	0	0	0	0	0	0	0	0	0	0	0
AT1G55860.2	3000	D	Y	NA	NA	NA	NA	ENSVATH04972549	0.0375	1	NA	0.023	0.102	-5.762	3.38	3.38	0.529218765	0.508087243	0.246362	0.246538	-3.762097012	-3.768744551	24	0	1	1	0	1	1	1	0	1	0	1	0	1	0	1
AT1G55860.2	2996	E	A	NA	NA	NA	NA	ENSVATH04972550	0.05	1	NA	0.04	0.084	-3.032	7.95	5.67	0.240636494	0.19544653	0.231703	0.231925	-3.228328755	-3.234890503	10	1	0	1	0	1	0	1	0	1	0	1	0	0	0	0
AT1G55860.2	2990	G	S	NA	NA	NA	NA	ENSVATH04972551	0.0125	1	NA	0.149	0	-1.509	NA	2.19	0.113849545	0.079712601	0.131475	0.131641	-0.864701935	-0.873277809	6	2	0	1	0	0	0	1	NA	NA	0	1	0	0	0	0
AT1G55860.2	2989	V	A	NA	NA	NA	NA	ENSVATH04972552	0.0125	1	NA	0.503	0.004	-0.877	2.81	-19.2	0.117362065	0.062745888	4.0145	4.07059	-2.04517448	-2.022117792	19	5	0	0	0	0	0	0	0	0	0	0	0	0	0	0
AT1G55860.2	2889	Y	S	NA	NA	NA	NA	ENSVATH04972554	0.05	1	NA	0.029	0.998	-8.683	2.86	7.435	0.892347541	0.849988444	0.068102	0.068122	-9.375943775	-9.382219783	36	1	1	1	1	1	1	1	0	0	0	1	1	1	0	1
AT1G55860.2	2871	L	Q	NA	NA	NA	NA	ENSVATH04972556	0.0125	1	NA	0.19	0.99	-5.728	1.99	-0.418	0.521255784	0.503456692	0.241891	0.242013	-3.266363044	-3.2707226	25	0	0	0	0	1	1	1	0	0	0	1	0	1	0	1
AT1G55860.2	2848	E	D	NA	NA	NA	NA	ENSVATH04972557	0.0125	1	NA	0.525	0.556	-0.452	3.47	-7.34	0.154650161	0.15429819	0.69465	0.695749	-0.530260434	-0.533854828	10	0	0	0	0	1	0	0	0	1	0	0	0	0	0	0
AT1G55860.2	2846	P	L	NA	NA	NA	NA	ENSVATH04972558	0.0125	1	NA	0.484	0.065	0.061	2.69	-4.765	0.092415141	0.068165148	0.866539	0.86796	-0.146529944	-0.148599764	7	2	0	0	0	1	0	0	0	0	0	0	0	0	0	0
AT1G55860.2	2846	P	S	NA	NA	NA	NA	ENSVATH04972559	0.0375	1	NA	0.816	0.01	-0.527	2.04	-4.765	0.058482812	0.021976772	0.866539	0.86796	-0.146529944	-0.148599764	7	6	0	0	0	0	0	0	0	0	0	0	0	0	0	0
AT1G55860.2	2769	Q	P	NA	NA	NA	NA	ENSVATH04972564	0.0125	1	NA	0.015	0.985	-3.486	8.45	2.2	0.336703198	0.303320097	0.181416	0.181506	-5.494307493	-5.500473746	8	0	1	1	0	1	0	1	0	1	0	1	0	1	0	1
AT1G55860.2	2748	R	G	NA	NA	NA	NA	ENSVATH04972565	0.0125	1	NA	0	0.35	-5.817	4.77	6.62	0.916805615	0.898686196	0.0800158	0.0800454	-9.794348846	-9.802859818	37	0	1	1	0	1	1	1	0	1	0	1	1	1	0	1
AT1G55860.2	2718	A	V	NA	NA	NA	NA	ENSVATH04972566	0.0125	1	NA	0	0.69	-3.954	7.69	8.77	0.945689487	0.931351795	0.0307104	0.0307187	-11.19849476	-11.2053182	39	0	1	1	0	1	0	1	0	1	1	1	1	1	1	1
AT1G55860.2	2594	V	I	NA	NA	NA	NA	ENSVATH04972569	0.0125	1	NA	0.447	0.012	-0.74	3.48	-6.94	0.106824212	0.076328815	0.557672	0.558311	-0.944556682	-0.948307358	6	2	0	0	0	0	0	0	0	1	0	0	0	0	0	0
AT1G55860.2	2450	D	N	NA	NA	NA	NA	ENSVATH04972572	0.05	1	NA	0.501	0.001	0.173	0.81	-3.33	0.02409044	0.041090534	0.484673	0.485326	-1.239004114	-1.244140383	7	16	0	0	0	0	0	0	0	0	0	0	0	0	0	0
AT1G55860.2	2263	S	Y	NA	NA	NA	NA	ENSVATH04972573	0.0125	1	NA	0.008	0.923	-5.089	9.69	0.525	0.525266817	0.507025441	0.247784	0.247988	-3.34592747	-3.351557042	25	0	1	1	0	1	1	1	0	1	0	1	0	1	0	1
AT1G55860.2	2087	M	L	NA	NA	NA	NA	ENSVATH04972574	0.0125	1	NA	0.143	0.002	-0.771	2.76	-3.22	0.122437437	0.107146841	0.918247	0.924174	-0.054746646	-0.059721645	10	1	0	1	0	0	0	0	0	0	0	0	0	0	0	0
AT1G55860.2	2076	A	V	NA	NA	NA	NA	ENSVATH04972575	0.0125	1	NA	0.079	0	-1.027	10.89	2.2	0.144629613	0.147641428	0.296392	0.259027	-3.47749317	-2.882629259	1	0	0	1	0	0	0	0	0	1	0	1	0	0	0	0
AT1G55860.2	2063	G	D	NA	NA	NA	NA	ENSVATH04972576	0.0375	1	NA	0.69	0	1.415	2.17	-2.34	0.023346205	0.080375922	1.69624	1.29559	-0.224094056	-0.514718768	2	10	0	0	0	0	0	0	0	0	0	0	0	0	0	0
AT1G55860.2	2035	D	N	NA	NA	NA	NA	ENSVATH04972578	0.0125	1	NA	0.113	0.021	-2.99	2.4	1.44	0.535246337	0.430526379	0.199169	0.199337	-3.606767103	-3.614173954	28	2	0	1	0	0	0	1	0	0	0	1	0	1	0	1
AT1G55860.2	2013	A	G	NA	NA	NA	NA	ENSVATH04972579	0.0125	1	NA	0.129	0.674	-3.564	3.23	4.73	0.72011013	0.688677808	0.130472	0.130527	-6.488440142	-6.494935532	27	0	0	1	0	1	0	1	0	1	0	1	0	1	0	1
AT1G55860.2	1983	L	V	NA	NA	NA	NA	ENSVATH04972580	0.0125	1	NA	0	1	-2.946	25.8	3.91	0.954595068	0.940734081	7.84E-19	2.30E-16	-12.39445578	-12.40132547	38	0	1	1	1	1	0	1	1	1	0	1	1	1	1	1
AT1G55860.2	1916	V	A	NA	NA	NA	NA	ENSVATH04972582	0.0125	1	NA	1	0	0.803	3.53	-3.55	0.08929879	0.065293799	0.793187	0.794806	-0.243237653	-0.246126743	6	2	0	0	0	0	0	0	0	1	0	0	0	0	0	0
AT1G55860.2	1899	S	F	NA	NA	NA	NA	ENSVATH04972583	0.0125	1	NA	0	1	-5.867	21.57	5.48	0.952836174	0.938164972	7.84E-19	7.84E-19	-12.55217398	-12.55945613	37	0	1	1	1	1	1	1	1	1	0	1	1	1	1	1
AT1G55860.2	1793	R	G	NA	NA	NA	NA	ENSVATH04972586	0.0125	1	NA	0.352	NA	0.533	NA	0	0.084724118	0.08178198	0.227634	0.280087	0	0	1	0	0	0	NA	NA	0	0	NA	NA	0	1	0	0	0	0
AT1G55860.2	1771	D	N	NA	NA	NA	NA	ENSVATH04972588	0.0125	1	NA	0.026	1	-4.917	7.65	4.76	0.952739268	0.938077091	0.0157809	0.0157858	-12.55631935	-12.56455541	37	0	1	1	1	1	1	1	0	1	0	1	1	1	1	1
AT1G55860.2	1697	K	R	NA	NA	NA	NA	ENSVATH04972589	0.0125	1	NA	0.116	0.544	-2.494	4.54	2.4	0.857394034	0.705390754	0.0496213	0.0496386	-10.27690735	-10.28502264	34	4	0	1	0	1	0	1	0	1	0	1	0	1	0	1
AT1G55860.2	1623	V	A	NA	NA	NA	NA	ENSVATH04972590	0.025	1	NA	0.007	0.129	-2.513	8.71	5.8	0.301897282	0.269701489	0.10845	0.108497	-5.363758909	-5.369986275	6	0	1	1	0	1	0	1	0	1	0	1	0	0	0	0
AT1G55860.2	1443	A	V	NA	NA	NA	NA	ENSVATH04972594	0.0125	1	NA	0.123	0.996	-3.483	9.33	3.76	0.726762265	0.6991902	0.147858	0.147939	-5.971835581	-5.978223766	29	0	0	1	1	1	0	1	0	1	0	1	0	1	0	1
AT1G55860.2	1443	A	T	NA	NA	NA	NA	ENSVATH04972595	0.0125	1	NA	0.098	0.836	-3.367	6.82	3.56	0.726762265	0.6991902	0.147858	0.147939	-5.971835581	-5.978223766	29	0	0	1	0	1	0	1	0	1	0	1	0	1	0	1
AT1G55860.2	1396	R	Q	NA	NA	NA	NA	ENSVATH04972596	0.025	1	NA	0	1	-3.733	6.64	4.63	0.924765086	0.90455391	0.0183692	0.0183756	-11.27953638	-11.28744626	34	0	1	1	1	1	0	1	0	1	0	1	1	1	1	1
AT1G55860.2	1348	P	L	NA	NA	NA	NA	ENSVATH04972597	0.0125	1	NA	0.255	0.001	-0.441	1.99	-6.62	0.045496019	0.008877265	1.32771	1.33329	-0.291627546	-0.286909494	11	10	0	0	0	0	0	0	0	0	0	0	0	0	0	0
AT1G55860.2	1241	T	A	NA	NA	NA	NA	ENSVATH04972599	0.0125	1	NA	0.279	0.464	-3.946	5.27	4.53	0.493259453	0.46336907	0.167111	0.167199	-4.735241188	-4.741652503	19	0	0	0	0	1	0	1	0	1	0	1	0	1	0	1
AT1G55860.2	1219	I	M	NA	NA	NA	NA	ENSVATH04972600	0.0125	1	NA	0.003	0.995	-2.376	15.74	-11.9	0.381270681	0.363184127	0.221217	0.221461	-2.993204618	-3.000715003	18	0	1	1	1	1	0	1	1	1	0	0	0	1	0	1
AT1G55860.2	1064	G	V	NA	NA	NA	NA	ENSVATH04972601	0.0125	1	NA	0.032	0.209	-7.076	19.68	-0.911	0.513687023	0.496735601	0.254071	0.254314	-3.134581528	-3.140719964	25	0	1	1	0	1	1	1	1	1	0	1	0	1	0	1
AT1G55860.2	795	E	D	NA	NA	NA	NA	ENSVATH04972604	0.0125	1	NA	0.61	0.014	-2.458	2.76	-11.1	0.40781593	0.11355689	0.128178	0.128244	-5.867292155	-5.874502469	26	9	0	0	0	0	0	1	0	0	0	0	0	1	0	0
AT1G55860.2	686	V	L	NA	NA	NA	NA	ENSVATH04972605	0.0125	1	NA	0.174	0.464	-2.673	3.79	-0.348	0.415890892	0.324378003	0.266322	0.266546	-2.458504378	-2.463893762	25	2	0	0	0	1	0	1	0	1	0	1	0	1	0	1
AT1G55860.2	614	K	T	NA	NA	NA	NA	ENSVATH04972608	0.0125	1	NA	0.042	0.976	-5.475	5.31	4.52	0.781126236	0.712578458	0.089091	0.0891262	-8.210353719	-8.218209445	28	1	0	1	0	1	1	1	0	1	0	1	0	1	0	1
AT1G55860.2	557	N	I	NA	NA	NA	NA	ENSVATH04972609	0.05	1	NA	0.024	0.322	-2.987	11.21	3.77	0.149097139	0.146437662	0.593053	0.593917	-0.918937274	-0.923490629	8	0	1	1	0	1	0	1	1	1	0	1	0	0	0	0
AT1G55860.2	533	F	Y	NA	NA	NA	NA	ENSVATH04972610	0.025	1	NA	0	1	-2.911	13.01	7.33	0.968647535	0.95673521	0.0135425	0.013546	-14.54127757	-14.55837712	37	0	1	1	1	1	0	1	1	1	0	1	1	1	1	1
AT1G55860.2	458	D	E	NA	NA	NA	NA	ENSVATH04972612	0.0125	1	NA	0.319	0.146	-1.087	4.09	-5.58	0.190975868	0.181594679	0.382134	0.382494	-2.108023452	-2.113964677	8	0	0	0	0	1	0	0	0	1	0	0	0	0	0	0
AT1G55860.2	401	V	M	NA	NA	NA	NA	ENSVATH04972613	0.0125	1	NA	0.01	0.851	0.109	10.34	-0.237	0.51047808	0.448555198	0.0182454	0.0182508	-9.047026953	-9.053761447	7	0	1	1	0	1	0	0	0	1	0	1	0	1	0	1
AT1G55860.2	335	V	I	NA	NA	NA	NA	ENSVATH04972615	0.0125	1	NA	0.165	1	-0.937	2.03	3.49	0.795038332	0.762545382	0.0676707	0.0676967	-8.00308355	-8.009495093	28	0	0	0	1	1	0	0	0	0	0	1	0	1	0	1
AT1G55860.2	310	V	F	NA	NA	NA	NA	ENSVATH04972616	0.0125	1	NA	0.002	0.993	-4.492	3.94	2.95	0.777443441	0.743359635	0.0647551	0.0647786	-7.853871961	-7.86147626	27	0	1	1	1	1	1	1	0	1	0	1	0	1	0	1
AT1G55860.2	261	T	S	NA	NA	NA	NA	ENSVATH04972617	0.0125	1	NA	0.705	0.003	0.359	1.23	-2.61	0.10913382	0.02438277	0.347497	0.34789	-1.796458557	-1.802162799	15	9	0	0	0	0	0	0	0	0	0	0	0	0	0	0
AT1G55860.2	58	T	K	NA	NA	NA	NA	ENSVATH04972621	0.05	1	NA	0.179	0.002	-2.878	7.18	4.23	0.317878711	0.263982779	0.185463	0.185606	-3.264468964	-3.271214573	15	1	0	0	0	0	0	1	0	1	0	1	0	1	0	0
AT1G57620.1	96	G	E	In cyb-1; loss of trafficking between ER and Golgi and formation of cytoplasmic bodies.	cyb-1	PubMed:24330158	CYB	SWISSPROT	NA	1	1	0	1	-7.831	34.72	8.85	0.941754205	0.928377373	0.0444259	0.0444346	-10.17948525	-10.18310808	41	0	1	1	1	1	1	1	1	1	1	1	1	1	1	1
AT1G57620.1	17	F	S	NA	NA	NA	NA	ENSVATH01383859	0.1125	1	0	0.38	0	-0.63	3.1	-9.36	0.113754717	0.087204784	1.95825	1.96213	-1.597288217	-1.591700663	9	2	0	0	0	0	0	0	0	1	0	0	0	0	0	0
AT1G57620.1	18	S	F	NA	NA	NA	NA	ENSVATH01383860	0.1625	1	0	0.702	0	0.343	2.25	-19.8	0.125236324	0.143650676	5.34927	5.47686	-5.33269277	-5.240016557	6	0	0	0	0	0	0	0	0	0	0	0	0	0	0	0
AT1G57620.1	50	A	G	NA	NA	NA	NA	ENSVATH01383863	0.0125	1	NA	0.622	0.006	-2.981	3.81	7.59	0.785951757	0.612034869	0.0918376	0.0918602	-7.327902141	-7.331413757	36	4	0	0	0	0	0	1	0	1	0	1	0	1	0	1
AT1G57620.1	14	A	S	NA	NA	NA	NA	ENSVATH04983392	0.0125	1	NA	0.428	0.06	-0.898	3.55	-9.7784	0.13753187	0.143817095	1.73433	1.73852	-0.895181831	-0.891174613	10	0	0	0	0	1	0	0	0	1	0	0	0	0	0	0
AT1G57620.1	20	S	L	NA	NA	NA	NA	ENSVATH04983394	0.0125	1	NA	0.691	0	2.093	1.88	-13.065	0.047507686	0.037375024	6.41465	6.55482	-3.912183102	-3.756562584	4	3	0	0	0	0	0	0	0	0	0	0	0	0	0	0
AT1G57620.1	23	C	Y	NA	NA	NA	NA	ENSVATH04983395	0.0625	1	NA	0.009	0.569	-1.203	7.7	4.69	0.096131963	0.098218048	1.0723	1.07355	-0.084915842	-0.083451833	5	0	1	1	0	1	0	0	0	1	0	1	0	0	0	0
AT1G57620.1	79	H	N	NA	NA	NA	NA	ENSVATH04983426	0.0125	1	NA	0.138	0.021	-4.914	4.65	6.59	0.614875936	0.510486923	0.237088	0.237177	-4.140316624	-4.144348214	31	2	0	1	0	0	1	1	0	1	0	1	0	1	0	1
AT1G58440.1	183	G	R	In dry2/seq1-5; extreme sensitivity to dehydration and ectopic localization of RHD2 NADPH oxidase and ROS production.	dry2/seq1-5	PubMed:19309460	SQE1	SWISSPROT	NA	1	1	0.016	1	-7.51	36.52	10	0.979737441	0.971960917	2.05E-17	7.84E-19	-14.91713567	-14.91713567	42	0	1	1	1	1	1	1	1	1	1	1	1	1	1	1
AT1G58440.1	378	R	H	NA	NA	NA	NA	ENSVATH00104923	0.025	1	NA	0.156	0.001	0.221	1.73	-2.475	0.334967479	0.202098063	0.529676	0.530272	-1.216516632	-1.220910963	28	4	0	1	0	0	0	0	0	0	0	0	0	1	0	0
AT1G58440.1	528	T	A	NA	NA	NA	NA	ENSVATH01395686	0.025	1	NA	0.168	0.091	-0.473	NA	-8.76	0.09570621	0.104194021	2.55285	2.60178	-0.811234583	-0.794917494	7	0	0	0	0	1	0	0	NA	NA	0	0	0	0	0	0
AT1G58440.1	123	E	D	NA	NA	NA	NA	ENSVATH01395752	0.025	1	NA	0.44	0	-0.689	7.63	6.61	0.758581738	0.731432219	0.165921	0.165997	-6.422973765	-6.430301954	30	0	0	0	0	0	0	0	0	1	0	1	0	1	0	1
AT1G58440.1	518	Y	N	NA	NA	NA	NA	ENSVATH04995104	0.0125	1	NA	0.002	0.959	-2.004	6	4.59	0.835803301	0.818950533	0.184396	0.184481	-5.942181806	-5.947860339	38	0	1	1	0	1	0	1	0	1	0	1	0	1	0	1
AT1G58440.1	385	S	N	NA	NA	NA	NA	ENSVATH04995117	0.0125	1	NA	0.194	0.005	-2.355	7.38	7.88	0.310273054	0.258585394	0.281679	0.281921	-3.191398135	-3.198655984	15	1	0	0	0	0	0	1	0	1	0	1	0	1	0	0
AT1G58440.1	313	D	E	NA	NA	NA	NA	ENSVATH04995122	0.05	1	NA	1	0.001	-1.397	10.63	4.41	0.868965803	0.821405784	0.0990696	0.0991096	-8.698969983	-8.713420019	35	1	0	0	0	0	0	1	0	1	0	1	0	1	0	1
AT1G58440.1	304	A	T	NA	NA	NA	NA	ENSVATH04995128	0.0125	1	NA	0.252	0.644	-3.682	7.53	8.94	0.916117537	0.881657539	0.0559433	0.0559624	-9.619343654	-9.626506689	39	1	0	0	0	1	0	1	0	1	1	1	1	1	0	1
AT1G58440.1	239	C	Y	NA	NA	NA	NA	ENSVATH04995133	0.0125	1	NA	1	0.001	-7.172	5.63	6.53	0.912331815	0.876241627	0.101426	0.101464	-9.781782061	-9.788937956	38	1	0	0	0	0	1	1	0	1	0	1	1	1	0	1
AT1G58440.1	235	E	D	NA	NA	NA	NA	ENSVATH04995134	0.0125	1	NA	0.805	0	1.743	1.74	-5.26	0.043973519	0.043234432	0.138213	0.138269	-7.756361797	-7.763941631	14	27	0	0	0	0	0	0	0	0	0	0	0	0	0	0
AT1G58440.1	40	R	L	NA	NA	NA	NA	ENSVATH04995211	0.0125	1	NA	0.236	0.958	-1.545	4.3	-7.405	0.148178161	0.15627924	2.01319	2.02035	-1.229676825	-1.221449382	11	0	0	0	0	1	0	1	0	1	0	0	0	0	0	0
AT1G58440.1	38	H	Y	NA	NA	NA	NA	ENSVATH04995212	0.0125	1	NA	0.058	0.003	-1.054	4.29	-15.7	0.108526352	0.113170987	1.82928	1.838	-1.107887024	-1.098212132	6	0	0	1	0	0	0	0	0	1	0	0	0	0	0	0
AT1G58440.1	32	K	Q	NA	NA	NA	NA	ENSVATH04995213	0.0125	1	NA	0.33	0.063	-1.03	2.18	-1.17	0.161935117	0.161761871	0.715484	0.720949	-0.449275245	-0.465103638	11	0	0	0	0	1	0	0	0	0	0	1	0	0	0	0
AT1G58440.1	29	V	F	NA	NA	NA	NA	ENSVATH04995214	0.0375	1	NA	0.708	0.201	-0.711	1.88	-14.4	0.075698244	0.035517759	1.92533	1.97904	-1.252759924	-1.192427091	9	5	0	0	0	1	0	0	0	0	0	0	0	0	0	0
AT1G58440.1	22	V	I	NA	NA	NA	NA	ENSVATH04995215	0.0125	1	NA	0.253	0	0.185	1.19	-15.7	0.16158555	0.105466373	0.82309	0.824456	-0.220385474	-0.222909723	17	3	0	0	0	0	0	0	0	0	0	0	0	0	0	0
AT1G58440.1	21	F	L	NA	NA	NA	NA	ENSVATH04995216	0.025	1	NA	0.878	0	0.976	1.58	-13.1	0.022472355	0.034591009	0.689358	0.610193	-0.789809941	-0.530444531	7	15	0	0	0	0	0	0	0	0	0	0	0	0	0	0
AT1G59820.1	413	D	A	Loss of internalization of phospholipids.	NA	PubMed:18344284	ALA3	SWISSPROT	NA	0	1	0	0.973	-7.012	29.51	9.9	0.981344594	0.973441486	9.85E-18	3.95E-17	-16	-16	40	0	1	1	0	1	1	1	1	1	1	1	1	1	1	1
AT1G59820.1	651	Q	R	NA	NA	NA	NA	ENSVATH05003231	0.0125	0	NA	0.206	0.289	-2.003	4.04	8.26	0.909189888	0.885702422	0.037569778	0.037579381	-11.02686753	-11.03573565	32	0	0	0	0	1	0	1	0	1	1	1	1	1	0	1
AT1G59820.1	655	A	G	NA	NA	NA	NA	ENSVATH05003232	0.0125	0	NA	0.044	0.618	-1.49	4.81	9.9	0.591561642	0.523958429	0.030079316	0.030086878	-10.24952708	-10.2564719	8	0	0	1	0	1	0	1	0	1	1	1	0	1	0	1
AT1G59820.1	780	A	V	NA	NA	NA	NA	ENSVATH05003246	0.0125	0	NA	0.288	0.001	-1.695	6.96	7.78	0.231508722	0.213582099	0.236730354	0.236908707	-3.452996144	-3.458709633	7	0	0	0	0	0	0	1	0	1	0	1	0	0	0	0
AT1G59820.1	976	R	H	NA	NA	NA	NA	ENSVATH05003258	0.0125	0	NA	0.028	0.858	-2.951	4.62	0.8983	0.587013154	0.571278088	0.172787659	0.172871187	-3.068660178	-3.072715272	29	0	1	1	0	1	0	1	0	1	0	1	0	1	0	1
AT1G59820.1	1211	P	Q	NA	NA	NA	NA	ENSVATH05003273	0.0375	0	NA	0.042	0.094	-1.028	2.09	-4.44	0.150511971	0.099300454	1.011774302	1.013902807	-0.013070022	-0.011065867	17	3	0	1	0	1	0	0	0	0	0	0	0	0	0	0
AT1G59870.1	354	G	D	In pen3-1; more susceptible to Plectosphaerella cucumerina, with higher frequency of fungal penetration and increased formation of elongating secondary hyphae after the first haustorium development.	pen3-1	http://www.plantcell.org/content/18/3/731.full	PEN3	BOTH	NA	1	1	0	1	-6.671	40.7	6.45	0.981303207	0.973400023	0.0109819	0.0109841	-16	-16	40	0	1	1	1	1	1	1	1	1	0	1	1	1	1	1
AT1G59870.1	915	G	S	In pen3-2; more susceptible to P. cucumerina, with higher frequency of fungal penetration and increased formation of elongating secondary hyphae after the first haustorium development.	pen3-2	http://www.plantcell.org/content/18/3/731.full	PEN3	BOTH	NA	1	1	0	1	-5.924	7.5	9.96	0.982646636	0.975317914	2.11E-16	3.68E-17	-16	-16	41	0	1	1	1	1	1	1	0	1	1	1	1	1	1	1
AT1G59870.1	709	K	E	NA	NA	NA	NA	ENSVATH00106690	1	1	NA	0.446	0	1.485	2.18	-10.9	0.014169764	0.126346458	0.820117	0.680348	-0.422834618	-0.182775193	2	15	0	0	0	0	0	0	0	0	0	0	0	0	0	0
AT1G59870.1	493	M	L	NA	NA	NA	NA	ENSVATH05003810	0.0125	1	NA	1	0	1.638	1.04	-2.7	0.01172342	0.7575466	0.109648	0.0895611	-8.635803695	-7.611671403	1	30	0	0	0	0	0	0	0	0	0	0	0	0	0	1
AT1G59870.1	749	S	N	NA	NA	NA	NA	ENSVATH05003821	0.025	1	NA	0.313	0	-0.52	NA	-8.64	0.089095947	0.058493683	2.12602	2.1355	-1.414845076	-1.404539052	8	3	0	0	0	0	0	0	NA	NA	0	0	0	0	0	0
AT1G59870.1	750	T	S	NA	NA	NA	NA	ENSVATH05003822	0.05	1	NA	0.158	0.621	-2.359	2.18	1.3555	0.697848305	0.667893582	0.153865	0.153924	-6.005969832	-6.012825946	27	0	0	0	0	1	0	1	0	0	0	1	0	1	0	1
AT1G59870.1	786	I	V	NA	NA	NA	NA	ENSVATH05003823	0.025	1	NA	0.677	0	0.354	2.61	-8.01	0.01647403	0.17957209	0.218847	0.18957	-4.868108784	-4.141407467	6	24	0	0	0	0	0	0	0	0	0	0	0	0	0	0
AT1G59870.1	1009	S	F	NA	NA	NA	NA	ENSVATH05003846	0.0125	1	NA	0.001	0.17	-3.185	11.24	4.55	0.535930707	0.468802108	0.103783	0.103873	-9.935968653	-9.957518602	6	0	1	1	0	1	0	1	1	1	0	1	0	1	0	1
AT1G59870.1	1101	A	T	NA	NA	NA	NA	ENSVATH05003850	0.0125	1	NA	0.37	0.281	-1.54	2.71	0.721	0.307614054	0.289146649	0.29445	0.294637	-3.249030557	-3.263903225	13	0	0	0	0	1	0	1	0	0	0	1	0	1	0	1
[truncated: 11,709 more rows]
